# Supplementary material
Source: publisher figshare collection journal article supplement (https://gsajournals.figshare.com/ndownloader/files/17799329)
Supplement: Supplementary file 1 [file 17799329]

## Sheet: Map info.
S/n	Nr	Locus	Segregation	Identical	Group	Position	interval	Scaffolds	Tag Seq	SNP_position	SNP		1	2	3	4	5	6	7	8	9	10	11	12	13	14	15	16	17	18	19	20	21	22	23	24	25	26	27	28	29	30	31	32	33	34	35	36	37
1	4333	53683	<nnxnp>		1	0		RACA24	TCTTCCTACCTGTTGCTATAGTTTCAGCAGACAGCCTTGCCACAGCATCTA	18	T	A	np	nn	nn	nn	nn	nn	np	np	np	np	nn	np	nn	np	nn	np	np	nn	np	np	np	nn	nn	np	nn	nn	np	nn	nn	nn	np	nn	nn	np	np	np	np
2	4325	53608	<lmxll>		1	0.842	0.842	RACA24	CCATTTGCTTGATCAAAATTTACAGTGACATCCTTTCATAACCGTTTTTTT	42	C	A	lm	lm	lm	lm	ll	ll	lm	ll	lm	lm	lm	lm	ll	lm	ll	ll	ll	lm	lm	ll	lm	ll	ll	lm	lm	ll	ll	ll	--	ll	lm	lm	lm	lm	lm	ll	lm
3	4324	53601	<nnxnp>		1	0.98	0.138	RACA24	GGCGATGCTTCTCCTGGATCTTTGTTTTTTTGTATTCATGTGTGTGTGTAC	16	A	G	np	nn	nn	nn	nn	nn	np	np	np	np	nn	np	nn	np	nn	np	np	nn	np	np	np	nn	nn	np	nn	nn	np	nn	--	nn	np	nn	nn	np	np	np	np
4	4326	53609	<nnxnp>		1	1.019	0.039	RACA24	CACAGGACTAGTGAGAGATCATTCCTGATCCGATAATATCTTGAGATCGAT	5	A	G	np	nn	--	nn	nn	nn	np	np	np	np	nn	np	nn	np	nn	np	np	nn	np	np	np	nn	nn	np	nn	nn	np	nn	--	nn	np	nn	nn	np	np	np	np
5	4331	53660	<hkxhk>		1	2.152	1.133	RACA24	GCATTTGCATTGACAAAGTCTGAAATAGTGATATATCTACTTACATAGTCA	34	A	T	hk	kk	kk	kk	hk	hk	hk	hh	hk	hk	kk	hk	hk	hk	hk	hh	hh	kk	hk	hh	hk	hk	hk	hk	kk	hk	hh	hk	hk	hk	hk	kk	kk	hk	hk	hh	hk
6	4330	53637	<hkxhk>		1	2.83	0.678	RACA24	ACTTTTTTAAACTTACATTGTCCAACACAGAAACAACATAAAAACATTTCT	13	T	C	hh	hk	hk	hk	kk	kk	hh	hk	--	hh	hk	hh	kk	--	kk	hk	hk	hk	hh	hk	hh	kk	kk	hh	hk	kk	hk	kk	kk	kk	hh	hk	hk	hh	hh	hk	hh
7	4328	53619	<lmxll>		1	6.344	3.514	RACA24	AGAAGTCAACACAAGACCAAAAAAATAGAATAAACATTTGTCAATCATCTC	25	T	C	lm	lm	--	lm	ll	ll	lm	ll	lm	lm	lm	lm	ll	lm	ll	ll	ll	lm	lm	ll	lm	ll	ll	lm	lm	ll	ll	ll	--	ll	lm	lm	lm	lm	lm	ll	lm
8	4370	54341	<nnxnp>		1	8.848	2.504	RACA24	GATCACGCTCAGGCTCATGAAAAAGTTTTCTAACCGAGCTTTGAGGGTTAT	30	A	T	np	nn	--	np	nn	nn	np	np	np	np	nn	np	nn	np	nn	np	np	nn	np	np	np	nn	nn	np	nn	nn	np	nn	nn	nn	np	nn	nn	np	np	np	np
9	3780	46110	<lmxll>		1	8.996	0.148	RACA23	ACGGGAAAAGGTAACTAAACTGTACAGAACAGGAAAGAGGAGGAAATATAA	16	A	G	lm	lm	lm	lm	ll	ll	lm	ll	lm	lm	lm	lm	ll	lm	ll	ll	ll	lm	lm	ll	lm	ll	ll	lm	lm	lm	ll	ll	ll	ll	lm	ll	lm	lm	lm	ll	lm
10	5258	66471	<lmxll>		1	9.078	0.082	sc00230	ACACGTTTTTCTTCTGTTCTCTTCATTCACTCGTCTGTTTGCGGTGTTGTC	42	G	A	lm	lm	lm	lm	ll	ll	lm	ll	lm	lm	lm	lm	ll	lm	ll	ll	ll	lm	lm	ll	lm	ll	ll	lm	lm	lm	ll	ll	ll	ll	lm	ll	lm	lm	lm	ll	lm
11	3777	46098	<hkxhk>		1	9.538	0.46	RACA23	GGAGAAGGAGTTTGGAGAATTGTGTCTTGAGAAAATTACATACACAAAGTN	17	A	G	hh	hk	hk	hh	kk	kk	hh	hk	hh	hh	hk	hh	kk	hh	kk	hk	hk	hk	hh	hk	hh	kk	kk	hh	hk	hk	hk	kk	kk	kk	hh	kk	hk	hh	hh	hk	hh
12	4302	53304	<hkxhk>		1	9.538	0	RACA24	ACAGAAATCTACAAAAGAAATCTGGAAATCACATTGTATGATTTTAAACAA	35	G	A	kk	hk	hk	kk	hh	hh	kk	hk	kk	kk	hk	kk	hh	kk	hh	hk	hk	hk	kk	hk	kk	hh	hh	kk	hk	hk	hk	hh	hh	hh	kk	hh	hk	kk	kk	hk	kk
13	3785	46131	<lmxll>		1	10.321	0.783	RACA23	CTGTGTGTTGGTGGAGGTGAGTCACCGCTCCATCAGAACGGTCCATTCTTC	3	T	C	lm	lm	--	lm	ll	ll	lm	ll	lm	lm	lm	lm	ll	lm	ll	ll	ll	lm	lm	ll	lm	ll	ll	lm	lm	lm	ll	ll	--	ll	lm	ll	lm	lm	lm	ll	lm
14	4360	54056	<lmxll>		1	10.335	0.014	RACA24	GAGAGCCTCTCTCAGTGAAAATAGGGGCCCAACCCTCTCCAAGCCCAGAGA	34	C	T	lm	lm	lm	lm	ll	ll	lm	ll	lm	lm	lm	lm	ll	lm	ll	ll	ll	lm	lm	ll	lm	ll	ll	lm	lm	lm	ll	ll	ll	ll	lm	ll	lm	lm	lm	ll	lm
15	3778	46100	<lmxll>		1	10.34	0.005	RACA23	TTGTAAAGGAGGTTTTTGTTACTTTCAATGTCTTTAGTGGTCATGTTTGTG	14	T	A	lm	lm	lm	lm	ll	ll	lm	ll	lm	lm	lm	lm	ll	lm	ll	ll	ll	lm	lm	ll	lm	ll	ll	lm	lm	lm	ll	ll	ll	ll	lm	ll	lm	lm	lm	ll	lm
16	3786	46133	<lmxll>		1	10.389	0.049	RACA23	TCATAGATTTATGAAGATTATTTACAAAGTGATGCATAATGTGGCTCCTCT	40	G	T	lm	lm	--	lm	ll	ll	lm	ll	lm	lm	lm	lm	ll	lm	ll	ll	ll	lm	lm	ll	lm	ll	ll	lm	lm	--	ll	ll	ll	--	lm	ll	lm	lm	lm	ll	lm
17	3791	46157	<efxeg>		1	10.814	0.425	RACA23	GGTGAAGACAAGCACAGCGATGTGCTTGCTGATGCCTCTGCAGAGCTTTCC	14	C	T	fg	ef	--	fg	ee	ee	--	eg	fg	fg	ef	fg	ee	fg	ee	eg	eg	ef	fg	eg	fg	ee	ee	fg	ef	ef	eg	ee	ee	ee	fg	ee	ef	fg	fg	eg	fg
18	3770	46044	<lmxll>		1	10.879	0.065	RACA23	NAATTCAGAGCCCTCAAGCTTGAAACTCGGAGTTCCTTTTCGTGTTTTNNN	9	G	A	lm	lm	--	lm	ll	ll	lm	ll	lm	lm	lm	lm	ll	lm	ll	ll	ll	lm	lm	ll	lm	ll	ll	lm	lm	lm	ll	ll	--	ll	lm	ll	lm	lm	lm	ll	lm
19	3787	46137	<efxeg>		1	11.013	0.134	RACA23	GCTTTGATGGTGTCTACATCAATTCCATTATCCTTTGAAAGGAAATAGATT	15	A	T	fg	ef	--	fg	ee	ee	fg	eg	fg	fg	ef	fg	ee	fg	ee	eg	eg	ef	fg	eg	fg	ee	ee	fg	ef	ef	eg	--	--	ee	fg	ee	ef	fg	fg	eg	fg
20	3761	45961	<hkxhk>		1	11.116	0.103	RACA23	AATCGTACCTGCAGCAGTGTCGCGTGGATAAAATGTCTCTGAATAACATAT	23	G	A	hh	hk	hk	--	kk	kk	hh	hk	--	hh	hk	hh	kk	hh	kk	hk	hk	hk	hh	hk	hh	kk	kk	hh	hk	hk	hk	kk	kk	kk	--	kk	hk	hh	--	hk	hh
21	5257	66458	<hkxhk>		1	11.204	0.088	sc00230	TCACAGAAAAAAAAAAATAATAATAATCTTTATAATGAAATAAACAACAAT	36	G	T	hh	hk	hk	hh	kk	kk	hh	hk	hh	hh	hk	hh	kk	hh	kk	hk	hk	hk	hh	hk	hh	kk	kk	hh	hk	hk	hk	kk	kk	kk	hh	kk	hk	hh	hh	hk	hh
22	3755	45906	<nnxnp>		1	11.418	0.214	RACA23	NAATTCCACTGGAAATTTCTGATTCAGATGATTATACCAATGATAATAGTT	21	G	A	np	nn	nn	np	nn	--	np	np	np	np	nn	np	nn	np	nn	np	np	nn	np	np	np	nn	nn	np	nn	nn	np	nn	--	nn	np	nn	nn	np	np	np	np
23	4336	53794	<lmxll>		1	11.424	0.006	RACA24	CTGGTTTACGGTTTCATCCACCACATGTTGTGGCATCTTGATGGACCCTTT	25	T	A	lm	lm	lm	lm	ll	ll	lm	ll	lm	lm	lm	lm	ll	lm	ll	ll	ll	lm	lm	ll	lm	ll	ll	lm	lm	lm	ll	ll	ll	ll	lm	--	lm	lm	lm	ll	lm
24	5204	65501	<nnxnp>		1	11.432	0.008	sc00203	GCCCGGGTTGTATCCCTTCTTCACCCCCCTGGTAACTCCGTGGTCCCAGCG	7	T	G	np	nn	--	np	nn	nn	np	np	--	np	nn	np	nn	np	nn	np	np	nn	np	np	np	nn	nn	np	nn	nn	np	nn	nn	nn	np	nn	nn	np	np	np	np
25	3772	46050	<nnxnp>		1	11.433	0.001	RACA23	GCCAAATTTGGGAAAACTGAGTCTCCCGGGAGAAGTGTGTCTCCGAGCGGC	29	T	G	np	nn	nn	np	nn	nn	np	np	np	np	nn	np	nn	np	nn	np	np	nn	np	np	np	nn	nn	np	nn	nn	np	nn	nn	nn	np	nn	nn	np	np	np	np
26	3766	46011	<nnxnp>	3766	1	11.443	0.01	RACA23	GTTGTCTGAACACATGAACTCATAGACTGTACACAGAGATCGACGAAGCCG	41	G	A	np	nn	nn	np	nn	nn	np	np	np	np	nn	np	nn	np	nn	np	np	nn	np	np	np	nn	nn	np	nn	nn	np	nn	nn	nn	np	nn	nn	np	np	np	np
27	5208	65527	<nnxnp>	3766	1	11.443	0	sc00203	ACAGGACTGGTGAGAGAGGCGAGGCAGAAACCCAGCTGGGTCCTTTTTAGA	28	G	A	np	nn	nn	np	nn	nn	np	np	np	np	nn	np	nn	np	nn	np	np	nn	np	np	np	nn	nn	np	nn	nn	np	nn	nn	nn	np	nn	nn	np	np	np	np
28	5255	66434	<nnxnp>	3766	1	11.443	0	sc00230	ACTTGAACAAACGTTGCTCTCTCCTGCTGTCAGCCACTTGTATTCACCAGA	38	T	A	np	nn	nn	np	nn	nn	np	np	np	np	nn	np	nn	np	nn	np	np	nn	np	np	np	nn	nn	np	nn	nn	np	nn	nn	nn	np	nn	nn	np	np	np	np
29	5370	68772	<nnxnp>	3766	1	11.443	0	sc00298	TGGAAAGTTAAACACAGTGGTGACCATGTGGAAGATCAAAAACAGATTCCT	19	G	A	np	nn	nn	np	nn	nn	np	np	np	np	nn	np	nn	np	nn	np	np	nn	np	np	np	nn	nn	np	nn	nn	np	nn	nn	nn	np	nn	nn	np	np	np	np
30	4337	53799	<nnxnp>		1	11.51	0.067	RACA24	AAGTAATGACTTTTTTCTGTAAGATGACCTTTTAAAGTTATAAAACCGCTG	44	T	A	np	nn	--	np	nn	nn	np	np	np	np	nn	np	nn	np	nn	np	np	nn	np	np	np	nn	nn	np	nn	nn	np	nn	nn	nn	np	nn	nn	np	np	np	np
31	3788	46142	<nnxnp>		1	11.515	0.005	RACA23	GCGGGAGTGCATGGATGTAAGCTGGACTGAAACAGGAAACTTTCTCAAACG	27	A	T	np	nn	nn	np	nn	nn	np	np	np	np	nn	np	nn	np	nn	np	np	nn	np	np	np	nn	nn	np	nn	nn	np	nn	nn	nn	np	nn	nn	np	np	np	np
32	3789	46143	<nnxnp>		1	11.526	0.011	RACA23	CTGACGTAGGTTTTTTCTGTCTGGATCAGCTCAGTCATGATGAACCTGCAC	32	A	G	np	--	nn	np	nn	nn	np	np	np	np	nn	np	nn	np	nn	np	np	nn	np	np	np	nn	nn	np	--	nn	np	nn	nn	nn	np	nn	--	np	np	np	np
33	3783	46116	<nnxnp>		1	11.541	0.015	RACA23	GATTTTGGTTGTTCTTGGTATATTTTTTACCCTCTGACCGTTTTTCTCTCA	25	C	T	np	nn	--	np	nn	nn	np	np	np	np	nn	np	nn	--	nn	np	np	nn	np	np	np	nn	nn	np	nn	nn	np	nn	nn	nn	np	nn	nn	np	--	np	np
34	3790	46153	<hkxhk>		1	11.857	0.316	RACA23	GGGAAACGAAGTAGTGCTGCATTAAATTTTTTTTTCTGTACTGACTGGATC	6	C	T	kk	hk	hk	kk	hh	hh	kk	hk	kk	kk	hk	kk	hh	kk	hh	hk	hk	hk	kk	hk	kk	hh	hh	kk	hk	hk	hk	hh	hh	hh	kk	hh	hk	kk	kk	hk	kk
35	3767	46024	<nnxnp>		1	12.02	0.163	RACA23	TTACTCAAACATGTTGACAAAATGTGATAAAATACACAAATCAGTCATTGA	47	T	C	np	nn	nn	np	nn	nn	np	np	np	np	nn	np	nn	np	nn	np	np	nn	np	np	np	nn	nn	np	nn	nn	np	nn	nn	nn	np	nn	nn	np	np	np	np
36	5253	66427	<nnxnp>		1	12.104	0.084	sc00230	GATCTGGTTCATAAAAGACGCCGCCCCACTTCTGCAGGAGAGCGTGTCAGT	12	G	A	np	nn	nn	np	nn	nn	np	np	np	np	nn	np	nn	np	nn	np	np	nn	np	np	np	nn	nn	np	nn	nn	np	nn	nn	nn	np	nn	nn	np	np	np	np
37	3155	38456	<hkxhk>	3155	1	12.225	0.121	RACA36	GATTGGCTGGGCAGGATGGCAGAGGTGGGTCGTTGGCATTGCAGTCCGTGA	24	G	A	kk	hk	hk	kk	hh	hh	kk	hk	kk	kk	hk	kk	hh	kk	hh	hk	hk	hk	kk	hk	kk	hh	hh	kk	hk	hk	hk	hh	hh	hh	kk	hh	hk	kk	kk	hk	kk
38	3763	45992	<hkxhk>	3155	1	12.225	0	RACA23	TAAAATTAATCCTTTAACCCATCGTCATTTACACAATTTCTTCCTTTAAGT	6	T	G	kk	hk	hk	kk	hh	hh	kk	hk	kk	kk	hk	kk	hh	kk	hh	hk	hk	hk	kk	hk	kk	hh	hh	kk	hk	hk	hk	hh	hh	hh	kk	hh	hk	kk	kk	hk	kk
39	3771	46047	<hkxhk>	3155	1	12.225	0	RACA23	GAGAAAACACAACTGAAAAACCGTGTGAGCAGTGGCACGACTTTATTATTT	22	G	A	kk	hk	hk	kk	hh	hh	kk	hk	kk	kk	hk	kk	hh	kk	hh	hk	hk	hk	kk	hk	kk	hh	hh	kk	hk	hk	hk	hh	hh	hh	kk	hh	hk	kk	kk	hk	kk
40	3156	38457	<hkxhk>		1	12.233	0.008	RACA36	CCTATTGCCCGGGCTCCAAGAACGGGAAGGCAGATGCTCTTTCTCGTCCGC	10	G	A	kk	hk	hk	kk	hh	hh	kk	hk	kk	kk	hk	kk	hh	--	hh	hk	hk	hk	kk	hk	kk	hh	hh	kk	hk	hk	hk	hh	hh	hh	kk	hh	hk	kk	kk	hk	kk
41	5256	66443	<nnxnp>		1	12.26	0.027	sc00230	AGACCTTTTTTTGCATATTACATTTGGGTTTTAACACTCTGGTTGCATTTC	20	C	A	np	nn	nn	np	nn	nn	np	np	np	--	nn	np	nn	np	nn	np	np	nn	np	np	np	nn	nn	np	nn	nn	np	nn	nn	nn	np	nn	nn	np	np	np	np
42	3775	46063	<hkxhk>		1	12.29	0.03	RACA23	GAATTCAAACACAGAACTTATCTGGAATGAATACATAAATAAACACTTGTT	29	A	G	--	hk	--	kk	hh	hh	kk	hk	kk	kk	hk	kk	hh	kk	hh	hk	hk	hk	kk	hk	kk	hh	hh	kk	hk	hk	hk	hh	hh	--	kk	hh	hk	kk	kk	hk	kk
43	5206	65521	<lmxll>		1	12.434	0.144	sc00203	GTATAACACCATCATTCTAGTCATTAGTAACGTGCAGTACAGGCTCCTTAC	13	A	G	lm	lm	lm	lm	ll	ll	lm	ll	lm	lm	lm	lm	ll	lm	ll	ll	ll	lm	lm	ll	lm	ll	ll	lm	lm	lm	ll	ll	ll	ll	lm	ll	lm	lm	lm	ll	lm
44	3760	45924	<lmxll>		1	12.436	0.002	RACA23	TTTTTATCTGTCAAACAAACAAACAAACAAGAGCTTCCGCTGCGAATGCTC	31	A	C	lm	lm	lm	lm	ll	ll	lm	ll	lm	lm	lm	lm	ll	--	ll	ll	ll	lm	lm	ll	lm	ll	ll	lm	lm	lm	ll	ll	ll	ll	lm	ll	lm	lm	lm	ll	lm
45	3759	45923	<lmxll>		1	12.438	0.002	RACA23	TTCAGGCAGATTATCTGAAGGTTGTTTGTGCATTTTTTTTACTAATCGTTT	47	G	A	lm	lm	lm	lm	ll	ll	lm	ll	lm	lm	lm	lm	ll	lm	ll	ll	ll	lm	lm	ll	lm	ll	ll	lm	lm	lm	ll	ll	ll	ll	lm	ll	lm	lm	lm	ll	lm
46	4039	49627	<nnxnp>		1	12.51	0.072	RACA39	CTCAGAGAAAACACAAACATGCAAACTCCACACAGAGAAAACCCAGCTGGG	8	G	A	np	nn	--	np	nn	nn	np	np	np	np	nn	np	nn	np	nn	np	np	nn	np	np	np	nn	nn	np	nn	nn	np	nn	nn	nn	np	nn	nn	np	np	np	np
47	3154	38455	<nnxnp>		1	12.515	0.005	RACA36	GAACCCAGACACAGCGTAACGTGGAACTCTCCAAAACATATAAACGCAAGC	3	C	T	np	nn	nn	np	nn	nn	np	np	np	np	nn	np	nn	np	nn	np	np	nn	np	np	np	nn	nn	np	nn	nn	np	nn	nn	nn	np	nn	nn	np	np	np	np
48	3153	38450	<lmxll>		1	12.549	0.034	RACA36	CTTGAACAAACTAGAATGAAAGACACATTAGGTTTTGATACTGTTATGCTG	29	A	T	lm	lm	--	lm	ll	ll	lm	ll	lm	lm	lm	lm	ll	lm	ll	ll	ll	lm	lm	ll	lm	ll	ll	lm	lm	lm	ll	ll	ll	ll	lm	ll	lm	lm	lm	ll	lm
49	5259	66474	<hkxhk>		1	12.804	0.255	sc00230	CTCATTTTTGGACTGTTTTGGGGTGATTGTGTGGAATCTGCTCCTCATCTC	47	T	G	hk	hk	--	kk	hh	hh	kk	hk	kk	kk	hk	kk	hh	--	hh	hk	hk	hk	kk	hk	kk	hh	hh	kk	hk	hk	hk	hh	hh	--	kk	hh	hk	kk	kk	hk	kk
50	3762	45967	<efxeg>		1	13.287	0.483	RACA23	CGATTGAACCCTAAACCCACGTGATTTTAAACAGTAAGTCAGACTACAAGC	10	C	T	fg	ef	ef	fg	ee	ee	fg	eg	fg	fg	ef	fg	ee	fg	ee	eg	eg	ef	fg	eg	fg	ee	ee	fg	ef	ef	eg	ee	ee	ee	fg	ee	ef	fg	fg	eg	fg
51	3774	46062	<nnxnp>		1	13.667	0.38	RACA23	NAATTCAGTTTGTAGGCTGTGAAATAATGGCTTGTAGTGGCCATCTCTCCT	29	G	A	np	nn	nn	np	nn	nn	np	np	np	np	nn	nn	nn	np	nn	np	np	nn	np	np	np	nn	nn	np	nn	nn	np	nn	nn	nn	np	nn	nn	np	np	np	np
52	3158	38470	<nnxnp>		1	14.06	0.393	RACA36	GAAAAAGGTTCGGTCTGTTTTCACGTCCTACAGCTTCAACAAATGTCTCAT	37	C	A	np	nn	nn	np	nn	nn	np	np	np	np	nn	np	nn	np	nn	np	np	nn	np	np	np	nn	nn	np	nn	nn	--	nn	nn	np	np	nn	nn	np	np	np	np
53	3756	45907	<lmxll>		1	14.242	0.182	RACA23	GCCTATAACTCATGTCTAGAAAGGTCAGCATTTGAATCCCAGAGTCATTTT	44	T	C	lm	lm	lm	lm	ll	ll	lm	ll	lm	lm	lm	lm	ll	lm	ll	ll	ll	lm	lm	ll	lm	ll	ll	lm	lm	lm	ll	ll	ll	ll	lm	ll	lm	lm	lm	ll	lm
54	3758	45914	<nnxnp>		1	14.632	0.39	RACA23	TCATCCAGAGGCACCTCAGCCTGCAGAGGGTTTCCGGAGGACAGGATGTTC	34	A	C	np	nn	nn	np	nn	nn	np	np	np	np	nn	np	nn	np	nn	np	np	--	np	np	np	nn	nn	np	nn	nn	np	nn	nn	nn	np	nn	nn	np	np	np	np
55	5254	66430	<nnxnp>		1	14.645	0.013	sc00230	TTAAGTTCATCTCATGACGAATGGGAGCAACAACAAAAGTGCTGCGTTTAT	30	A	C	np	nn	nn	np	nn	nn	np	np	np	np	nn	np	nn	np	nn	np	np	nn	np	np	np	nn	nn	np	nn	nn	np	nn	nn	nn	np	nn	nn	np	np	np	np
56	3776	46064	<lmxll>		1	14.814	0.169	RACA23	GAATTCCTTAAATTAGAACTTTTACTGACACTGAACAATTTATTCTGAAGA	13	T	C	--	lm	--	lm	ll	ll	lm	ll	lm	lm	lm	lm	ll	--	ll	ll	ll	lm	lm	ll	lm	ll	ll	lm	lm	lm	ll	ll	--	ll	lm	ll	lm	lm	lm	ll	lm
57	3781	46113	<nnxnp>		1	15.059	0.245	RACA23	CTTGTGATTGGTATAAAATGGTAGAAAATTGGTTAATTTTAGCTGTGAATG	20	A	G	np	nn	nn	np	nn	nn	np	np	np	np	nn	np	nn	--	nn	np	np	nn	np	np	np	nn	nn	np	nn	nn	np	nn	nn	nn	np	nn	nn	np	np	np	np
58	4329	53626	<hkxhk>		1	17.826	2.767	RACA24	GGAACAGATCACTTATTAGATATATAACTAAAAAAAAAAAGACAAACAGGA	28	T	A	kk	hk	hk	hk	hh	hh	kk	hk	kk	kk	hk	kk	hh	kk	hh	hk	hk	hk	kk	hk	kk	hh	hh	kk	hk	hh	hk	hh	hh	hh	kk	hk	hk	kk	kk	hk	kk
59	4335	53749	<nnxnp>		1	21.943	4.117	RACA24	GGATCTGCATACATCGATCAGGCGTTTGAGCTCAAGCTATGCAAGATAAAG	9	T	A	np	nn	nn	nn	nn	nn	np	np	np	np	nn	np	nn	np	nn	np	np	nn	np	np	np	nn	nn	np	nn	nn	np	nn	nn	nn	np	nn	nn	np	nn	np	np
60	4354	53995	<lmxll>		1	22.022	0.079	RACA24	GACATATCACCAACAAAGATTTCATGCTGCCTCCTGGACATCCTCCGTTGT	21	T	A	ll	ll	ll	ll	lm	ll	ll	lm	ll	ll	ll	ll	lm	ll	lm	lm	lm	ll	ll	ll	lm	lm	lm	ll	ll	lm	ll	lm	lm	lm	ll	ll	ll	ll	ll	lm	ll
61	4357	54016	<lmxll>		1	22.024	0.002	RACA24	AATCTCTTGGTTTACTAGTAATAAAATTGTTATGGAAGACATGATTGTATT	14	C	T	ll	ll	--	ll	lm	ll	ll	lm	ll	ll	ll	ll	lm	ll	lm	lm	lm	ll	ll	ll	lm	lm	lm	ll	ll	lm	ll	lm	lm	lm	ll	ll	ll	ll	ll	lm	ll
62	4344	53925	<lmxll>		1	22.469	0.445	RACA24	GATCGTGAGCAAAGATTTAGGTAAATGTGGCAATTATGTACAGGTGACATA	8	G	T	ll	ll	ll	ll	lm	ll	ll	lm	ll	ll	ll	ll	lm	ll	lm	lm	lm	ll	ll	ll	lm	lm	lm	ll	ll	lm	lm	lm	--	lm	ll	ll	ll	ll	ll	lm	ll
63	4342	53923	<lmxll>		1	22.545	0.076	RACA24	TTAAGAATTGTTCTTATTATGTACCATAGCAGTCCTGGACTTTAAGAACCT	7	T	A	ll	ll	--	ll	lm	ll	ll	lm	ll	ll	ll	ll	lm	ll	lm	lm	lm	ll	ll	ll	lm	lm	lm	ll	ll	lm	lm	lm	lm	lm	ll	ll	ll	ll	ll	lm	ll
64	4334	53748	<nnxnp>		1	23.058	0.513	RACA24	CCCTGAAGCTAGAAAGTGTTATCGCGCTCTTTGGTGTTGAGGGAAAAAAAA	21	T	G	np	nn	nn	nn	nn	nn	np	np	np	np	nn	np	nn	np	nn	np	np	nn	np	np	np	nn	nn	np	nn	nn	np	nn	nn	nn	np	nn	nn	np	nn	np	np
65	4348	53960	<lmxll>		1	23.463	0.405	RACA24	NAATTCATCCCACTGTTTTTTTTCCCACATAAAATAATACAACTGAAACAT	37	T	C	lm	lm	--	lm	ll	lm	lm	ll	lm	lm	lm	lm	ll	lm	ll	ll	ll	lm	lm	lm	ll	ll	ll	--	lm	--	lm	ll	ll	ll	lm	lm	lm	lm	lm	ll	lm
66	4340	53909	<lmxll>		1	26.783	3.32	RACA24	CATTACTGCACACATTTTCTTTAAGTCGTTTTCAATTAAAATGGAACAGAC	43	G	A	ll	ll	ll	ll	lm	ll	ll	lm	ll	ll	ll	ll	lm	ll	lm	lm	lm	ll	ll	ll	lm	lm	lm	ll	ll	lm	lm	lm	lm	lm	ll	ll	ll	ll	ll	lm	ll
67	4345	53936	<lmxll>		1	27.89	1.107	RACA24	TAAGAAAAACAGCTACAAATTCAGGGGTTTTGTGCTGCACAAATCCAAAAA	39	C	A	ll	ll	ll	ll	lm	ll	ll	lm	ll	--	ll	ll	lm	ll	lm	lm	lm	ll	ll	ll	lm	lm	lm	ll	ll	lm	ll	lm	lm	lm	ll	ll	ll	ll	ll	lm	ll
68	4316	53418	<lmxll>		1	31.691	3.801	RACA24	GATAATGGGTAGACTGTGGCAACAAAAGTGGTAATTAAAACTGAAGTATGA	31	T	C	ll	ll	ll	ll	lm	ll	ll	lm	ll	ll	ll	lm	lm	ll	lm	lm	lm	ll	ll	ll	lm	lm	lm	ll	ll	lm	ll	lm	lm	lm	ll	ll	ll	ll	ll	lm	ll
69	4317	53439	<lmxll>		1	32.255	0.564	RACA24	CTTTTGTTGTGTGATTTCAGTCCATATTGTAGAATCCCAGTAGACTTGTCA	18	A	G	ll	ll	ll	ll	lm	ll	ll	lm	ll	ll	ll	lm	lm	ll	lm	lm	lm	ll	ll	ll	lm	lm	lm	ll	ll	lm	ll	lm	--	lm	ll	ll	ll	ll	ll	lm	ll
70	4314	53397	<efxeg>		1	33.077	0.822	RACA24	CCAACACTAAACCACCCTTCTCTGTATGTCTACAATCATTTCCACAGAACA	10	G	A	ee	ee	eg	eg	--	eg	ee	ef	ee	ee	ee	ef	fg	ee	fg	fg	ef	ee	ee	ee	ef	ef	ef	ee	eg	fg	eg	fg	ef	ef	eg	ee	ee	ee	eg	fg	ee
71	4319	53470	<lmxll>	4319	1	33.147	0.07	RACA24	TGTTAATACAGAAACTCCTCTGCTACGTCTTCTAAACTTGTCCATATCTCC	7	A	T	ll	ll	ll	ll	lm	ll	ll	lm	ll	ll	ll	lm	lm	ll	lm	lm	lm	ll	ll	ll	lm	lm	lm	ll	ll	lm	ll	lm	lm	lm	ll	ll	ll	ll	ll	lm	ll
72	4323	53508	<lmxll>	4319	1	33.147	0	RACA24	GAGCCGTTCGAGCGTTTCCCGTCTCCTGTCATCATCTCAATGTGAAAAACT	12	C	T	ll	ll	ll	ll	lm	ll	ll	lm	ll	ll	ll	lm	lm	ll	lm	lm	lm	ll	ll	ll	lm	lm	lm	ll	ll	lm	ll	lm	lm	lm	ll	ll	ll	ll	ll	lm	ll
73	4321	53485	<lmxll>		1	33.257	0.11	RACA24	TTAGGTGCAGTGCTAACAAAACCTGCATTATGTATGGATTCAATCCAGATT	7	C	T	ll	ll	ll	ll	lm	ll	ll	lm	ll	ll	ll	lm	lm	ll	lm	lm	lm	ll	ll	ll	lm	lm	lm	ll	ll	lm	ll	lm	--	lm	ll	ll	ll	ll	ll	lm	ll
74	4318	53461	<lmxll>		1	33.355	0.098	RACA24	GCTGATTGCTGCATATTAGAAGGACGTGGGTTGGATTGAATGCAATGAAAA	23	A	G	ll	ll	--	ll	lm	ll	ll	lm	ll	ll	ll	lm	lm	ll	lm	lm	lm	ll	ll	ll	lm	lm	lm	ll	ll	lm	ll	lm	lm	lm	ll	ll	ll	--	ll	lm	ll
75	4320	53483	<lmxll>		1	35.222	1.867	RACA24	CTGGCACCCACTGAGAAAACAATCTGCAGGTCAGTGCTGGCTCACGTGTCA	15	A	G	ll	ll	--	ll	lm	ll	ll	lm	--	ll	ll	lm	lm	ll	lm	lm	lm	ll	ll	ll	lm	lm	lm	ll	lm	lm	ll	lm	lm	--	ll	ll	ll	ll	ll	lm	ll
76	4363	54168	<nnxnp>		1	39.087	3.865	RACA24	GGTATCATCAACATAAAATAAAGTTTAAAAAGTTGATGACAATTTCTTTTT	31	A	G	np	np	nn	nn	nn	nn	np	np	np	np	nn	np	nn	np	nn	np	np	nn	np	np	np	nn	np	np	nn	nn	np	nn	np	nn	nn	np	nn	np	nn	nn	np
77	4367	54234	<nnxnp>		1	40.821	1.734	RACA24	GATGTAGTATTTTGTAATATCGCCCTTTTGAAATTAGGTACTAAAGCGAAA	26	T	A	np	np	nn	nn	nn	nn	np	np	np	np	nn	np	nn	np	nn	np	np	nn	np	np	np	nn	np	np	--	nn	np	nn	np	np	nn	np	nn	np	nn	nn	np
78	4364	54181	<nnxnp>		1	40.937	0.116	RACA24	GTAAAATTGTGTATAATTAGCTTTTCAAAATAAAAGCAGCAAAACAATAGG	9	G	T	np	np	--	nn	nn	nn	np	np	np	np	nn	np	nn	np	nn	np	np	nn	np	np	np	nn	np	np	nn	nn	--	nn	np	--	nn	np	nn	np	nn	nn	np
79	4366	54219	<nnxnp>		1	42.308	1.371	RACA24	CCCGTCTGTTGTGGCTCTCTGGTTTAAAAAATATATATTTTTTACTTTAAA	36	T	A	np	np	nn	nn	nn	nn	np	np	np	np	nn	np	nn	np	nn	np	np	nn	np	np	np	nn	np	np	--	nn	np	nn	np	np	nn	np	nn	np	nn	nn	np
80	4369	54282	<nnxnp>		1	42.332	0.024	RACA24	CCTGTGCAGACAAACTGAAACCTGTGCGCAGGGTTTTCAAATAAAAAAAAG	27	A	G	np	np	nn	nn	nn	nn	np	np	np	np	nn	np	nn	np	nn	np	np	nn	np	np	np	--	np	np	nn	nn	np	nn	np	np	nn	np	nn	np	nn	nn	np
81	4291	53199	<lmxll>		1	49.669	7.337	RACA24	CATTGAATTAGACATAACAACTGAGGCAGAACTAAACCAACAGGCACGACT	33	A	T	ll	lm	--	ll	ll	lm	ll	ll	lm	ll	lm	ll	ll	lm	ll	ll	ll	lm	lm	lm	--	ll	ll	lm	lm	ll	lm	lm	ll	ll	ll	lm	lm	lm	lm	ll	ll
82	4287	53139	<hkxhk>		1	49.917	0.248	RACA24	GGGGTCACTTTGACACAAACACTTTGACTTCCTGTTTGACGCTGCAGTAAA	46	G	T	hk	hh	hk	kk	kk	hk	hk	hk	hh	hk	hh	hk	kk	hh	kk	kk	hk	hh	hh	hh	hk	hk	hk	hh	hk	kk	hk	hk	hk	hk	kk	hh	hh	hh	hk	kk	hk
83	3542	43241	<hkxhk>		1	52.684	2.767	RACA25	TCTTTATCAACTGTTGGTCTGCACATTTCTGCTGTTAAGTTTCTTTTTTTG	33	G	A	hk	hh	--	kk	kk	hk	hk	hk	hh	hk	hh	hk	kk	hh	kk	hk	hh	hh	hh	hh	hk	hk	hk	hh	hk	kk	hk	hk	--	hh	kk	hh	hh	hh	hk	kk	hk
84	3545	43269	<hkxhk>		1	52.746	0.062	RACA25	TCCACCATTGGTTGTTCCACTGTGGTTCCACAAGAGAGCATGAGTGTCACA	17	C	T	hk	kk	hk	hh	hh	hk	hk	hk	kk	hk	kk	hk	hh	kk	hh	hk	kk	kk	kk	kk	hk	hk	hk	kk	hk	hh	hk	hk	hk	kk	hh	kk	kk	kk	hk	hh	hk
85	4279	53075	<hkxhk>		1	54.372	1.626	RACA24	ACAGAAGGTCACAGTCCAGCTGCAACTTTGGCAGTGTCTTTCGGTAAAAGT	32	A	G	hk	hh	hk	kk	kk	hk	hk	hk	--	hk	hh	hk	kk	hh	kk	kk	hh	hh	hh	hh	hk	hk	hk	hh	hk	kk	hk	hk	--	hh	kk	hh	hh	hh	hk	kk	hk
86	4280	53076	<hkxhk>		1	54.519	0.147	RACA24	ACCCTGACAATCAATTTAATAATAAATAAAAATACATGTTTGAGAGTCCCG	4	T	A	hk	kk	hk	hh	hh	hk	hk	hk	kk	hk	kk	hk	hh	kk	hh	hh	kk	kk	kk	kk	hk	hk	hk	kk	hk	hh	hk	hk	hk	kk	hh	--	--	kk	hk	hh	hk
87	3588	43688	<nnxnp>		1	54.917	0.398	RACA25	ATATTAAAAGTGTTCCCAGTGGTTTTTTAGAGATGGTAATGCAAATTTCCA	21	T	G	np	--	nn	nn	nn	nn	np	np	np	np	np	np	nn	np	nn	nn	np	np	np	np	np	np	np	np	nn	nn	nn	nn	np	np	nn	nn	np	np	nn	nn	np
88	3584	43662	<nnxnp>		1	54.928	0.011	RACA25	ACAAACGTATTATGTTACGTGCTTTAAAAACTTATGGTATCAGTGTTGGAT	43	T	C	np	--	nn	nn	nn	nn	np	np	np	np	np	np	nn	np	nn	nn	np	np	np	np	np	np	np	np	nn	nn	nn	nn	--	np	nn	nn	np	np	nn	nn	np
89	4286	53136	<lmxll>		1	58.408	3.48	RACA24	GTTTGTGGAAACAGTTACATAAAAACTACATCTGGGAGCCAAAAATAAAGC	12	A	G	lm	ll	ll	lm	lm	ll	lm	lm	ll	lm	ll	lm	lm	ll	lm	lm	lm	ll	ll	ll	lm	lm	lm	ll	ll	lm	ll	ll	lm	lm	lm	ll	ll	ll	ll	lm	lm
90	4289	53148	<lmxll>	4289	1	59.789	1.381	RACA24	ACAGACTTTTGCATTCAATTATTTATTTATTTATTTTTTAAGCTAAAGCAA	15	C	T	lm	ll	ll	lm	lm	ll	lm	lm	ll	lm	ll	lm	lm	ll	lm	lm	lm	ll	ll	ll	lm	lm	lm	ll	ll	lm	ll	ll	lm	lm	lm	ll	ll	ll	ll	lm	lm
91	4290	53151	<lmxll>	4289	1	59.789	0	RACA24	AATTAAGACTCGTCAGTTTTCCTGGAAGGCTCGGCGGCCGCGGCGAGGGCG	14	A	G	lm	ll	ll	lm	lm	ll	lm	lm	ll	lm	ll	lm	lm	ll	lm	lm	lm	ll	ll	ll	lm	lm	lm	ll	ll	lm	ll	ll	lm	lm	lm	ll	ll	ll	ll	lm	lm
92	4288	53141	<lmxll>		1	59.945	0.156	RACA24	GACCGGAGCAGCTCTACCTGATGGCATGGCGCTGAGCTCAGTGTTTTCCAG	3	C	T	lm	ll	--	lm	lm	ll	lm	lm	ll	lm	ll	lm	lm	ll	lm	lm	lm	ll	ll	ll	lm	lm	lm	ll	ll	lm	ll	ll	lm	lm	lm	ll	ll	ll	ll	lm	lm
93	3561	43473	<hkxhk>		1	63.611	3.666	RACA25	TCTGCTGCCACGGAACAGTCCTCAGAACCAGAACCAAATCGATACTGGGCN	8	C	T	kk	hk	hh	hk	hh	hh	kk	hk	hh	hk	kk	kk	hk	kk	hk	hh	hk	hk	hk	kk	kk	kk	kk	hk	hh	hk	hk	hh	--	hk	hk	hh	kk	hk	hh	hk	kk
94	3565	43498	<lmxll>		1	65.1	1.489	RACA25	AAATGTAACAGAACTTCAGAATAAAACCCAAACAGAAAAGATACTGTTGGC	8	C	G	lm	ll	ll	lm	ll	ll	lm	ll	ll	lm	lm	lm	lm	lm	ll	ll	ll	ll	ll	lm	lm	lm	lm	ll	ll	lm	lm	ll	lm	ll	lm	ll	lm	ll	ll	lm	lm
95	3568	43523	<efxeg>		1	66.086	0.986	RACA25	ATTTAGCCATAAACTGACACTGAGGATGTTTCTCCAAATGAATATTCCGTC	23	G	T	ef	ee	ee	fg	eg	eg	ef	ee	eg	fg	ef	ef	fg	ef	ee	eg	ee	ee	ee	ef	ef	ef	ef	ee	eg	fg	fg	eg	--	ee	--	eg	ef	ee	eg	fg	ef
96	3548	43375	<abxcd>		1	68.996	2.91	RACA25	TATAAGTCAAACCTAAAATGGGTAAAAACCTCTAAATCGGCTTTAATTCTA	19	G	T	bc	ac	ad	bd	ad	ad	bc	ac	ad	bd	bc	bc	bd	bc	bc	ad	ac	ac	ac	bc	bc	--	bc	ac	ad	bd	bd	ad	bc	ac	bd	ad	--	ac	ad	bd	bc
97	3579	43612	<nnxnp>		1	69.799	0.803	RACA25	ATTATATATAAAGACGTATACGGCTGAGGACGGCGTGTCACGCGACTGTGT	29	G	A	np	np	--	nn	nn	nn	np	np	nn	--	np	np	nn	np	np	nn	np	np	np	np	np	np	np	np	nn	nn	nn	nn	--	np	nn	nn	np	np	nn	nn	np
98	3550	43389	<nnxnp>	3550	1	70.046	0.247	RACA25	TTGTTGGTGTTGGAGACTTTTTTAAAAGAAATCTTATTTTTGGGTTTAAAT	27	T	G	np	np	nn	nn	nn	nn	np	np	nn	nn	np	np	nn	np	np	nn	np	np	np	np	np	np	np	np	nn	nn	nn	nn	--	np	nn	nn	np	np	nn	nn	np
99	5353	68411	<nnxnp>	3550	1	70.046	0	sc00286	TTATAGAGATATGAGATAATATAATTAACAAGAAAAATCCAGAATATAACA	7	A	G	np	np	nn	nn	nn	nn	np	np	nn	nn	np	np	nn	np	np	nn	np	np	np	np	np	np	np	np	nn	nn	nn	nn	--	np	nn	nn	np	np	nn	nn	np
100	5510	71493	<nnxnp>	3550	1	70.046	0	sc02222	GATTTAAGTGCTAGCTAAGAGCTTCTTCTCCAGAAGTCTGGAAACTCGTTG	12	G	A	np	np	nn	nn	nn	nn	np	np	nn	nn	np	np	nn	np	np	nn	np	np	np	np	np	np	np	np	nn	nn	nn	nn	--	np	nn	nn	np	np	nn	nn	np
101	5173	65066	<hkxhk>		1	73.329	3.283	sc00187	CAAGAGTGATTCCCAAGCAAACTTTACCAACAAACAGCCATGAAGTATTAT	18	A	T	hh	hk	kk	hk	kk	kk	hh	hk	kk	hk	hh	hh	hk	hh	hk	kk	hk	hk	hk	hk	hh	hh	hh	hk	kk	hk	hk	kk	hh	hk	hk	kk	--	hk	kk	hk	hh
102	3543	43245	<lmxll>		1	77.932	4.603	RACA25	TTCCAAAAGTCAATCAAACTAGGTGAGATTTTTGAGGATATTTATAATAAA	35	G	A	lm	ll	--	lm	lm	ll	lm	lm	ll	lm	lm	lm	lm	lm	lm	ll	ll	ll	ll	lm	lm	lm	lm	ll	ll	lm	ll	ll	lm	ll	lm	ll	ll	ll	ll	lm	lm
103	3546	43271	<lmxll>		1	79.839	1.907	RACA25	TTCTCCAAAAAAAAGATAAAAAATAATATTAGATCCTTGAAATCCTTCAAA	31	G	T	lm	ll	lm	lm	lm	ll	lm	lm	ll	lm	lm	lm	lm	lm	lm	ll	ll	ll	ll	lm	lm	lm	lm	ll	ll	lm	lm	ll	lm	ll	lm	ll	ll	ll	ll	lm	lm
1	2172	26755	<lmxll>		2	0		RACA10	GAATTCTGAATCACCGCGGAGTCTCATCAGGAAGGTTGCAGGTCTGAATCC	10	T	C	lm	ll	--	ll	ll	ll	lm	ll	ll	lm	ll	lm	ll	ll	ll	lm	lm	lm	ll	ll	ll	ll	ll	lm	--	lm	lm	ll	--	lm	ll	ll	lm	lm	ll	lm	ll
2	2158	26589	<nnxnp>		2	1.003	1.003	RACA10	CTCCAAAACATATAAACTCGAGCGACTCGCCCAACATCATCCATGTTTTCC	17	C	T	nn	nn	nn	np	nn	nn	nn	np	np	np	np	np	nn	nn	nn	np	np	nn	np	np	np	np	np	nn	nn	nn	nn	nn	nn	np	nn	nn	np	nn	nn	np	nn
3	5288	67117	<lmxll>		2	1.203	0.2	sc00248	TCTCTGATCAGAACCAGAAACCTTAAGAACCCTGGAGTTCCTCTGAGAGAG	23	T	G	lm	ll	lm	ll	ll	ll	lm	ll	ll	lm	ll	lm	ll	ll	ll	ll	lm	lm	ll	ll	ll	ll	ll	lm	ll	lm	lm	ll	lm	lm	ll	ll	lm	lm	ll	lm	ll
4	2169	26720	<nnxnp>		2	1.316	0.113	RACA10	CCAGTGGTGTTGGTAGCAAGACATTCATAGACATAAAGAGCTGCAAAGAAC	37	G	T	nn	nn	--	--	nn	--	nn	np	np	np	np	np	nn	nn	nn	np	np	nn	np	np	np	np	np	nn	nn	nn	--	nn	--	np	np	nn	np	nn	nn	np	nn
5	2160	26614	<nnxnp>		2	1.605	0.289	RACA10	GTTTTTGGCCAAAAAACTCCATGGATGTGTTGTTATATCTTAAAAGTTCGA	25	T	G	nn	nn	--	np	nn	nn	nn	np	np	np	np	np	nn	nn	nn	np	np	nn	np	np	np	np	np	nn	nn	nn	nn	nn	nn	np	np	nn	np	nn	nn	np	nn
6	2168	26698	<nnxnp>		2	1.618	0.013	RACA10	TCTGCCGCACTGATCAGATGAACATCTGTTATCTCTGTCTGATGGACGGAC	19	A	G	nn	nn	nn	np	nn	nn	nn	np	np	np	np	np	nn	nn	nn	np	np	nn	np	np	np	np	np	nn	nn	nn	nn	nn	nn	np	np	nn	np	nn	nn	np	nn
7	2809	34054	<hkxhk>		2	2.095	0.477	RACA31	TTGTTTTCATACTAGAATCCTGGACGTGTTTTTTCTATGATGGTTTGAACT	3	T	C	hk	hh	--	hk	hh	hh	hk	hk	hk	kk	hk	hk	hh	hh	hh	hk	kk	hk	hk	hk	hk	hk	hk	hk	hh	hk	hk	hh	hk	kk	hk	hh	kk	hk	hh	kk	hh
8	5287	67102	<hkxhk>		2	3.273	1.178	sc00248	TTACCAATGGCAATCCTGAAACCAGTCCCTAGACCAGAAAGTTATTTCAAA	43	A	C	hk	--	hk	hk	hh	hh	hk	hk	hk	kk	hk	hk	hh	hh	hh	hk	kk	hk	hk	hk	hk	hk	hk	hk	hh	hk	hk	hh	hk	--	hk	hh	kk	hk	hh	kk	hh
9	2189	26888	<nnxnp>		2	3.373	0.1	RACA10	AAATCCTTAGGGAAAAGTTTAAATTTGTTTGAGACAGAAGTCCAAGATTTC	14	A	G	nn	nn	nn	np	nn	nn	nn	np	np	np	np	nn	nn	nn	nn	np	np	nn	np	np	np	np	np	nn	nn	nn	--	nn	nn	np	np	nn	np	nn	nn	np	nn
10	2176	26782	<lmxll>		2	3.395	0.022	RACA10	GGCCGAGCAGCCCTCCGGTCTCCAGGGCTCCTGGCCGCCTCTGTGTTTGGC	16	G	A	lm	ll	lm	ll	ll	ll	lm	ll	ll	--	ll	lm	ll	ll	ll	lm	lm	lm	ll	ll	ll	--	ll	lm	ll	lm	lm	ll	lm	lm	ll	ll	lm	lm	--	lm	ll
11	2173	26756	<lmxll>		2	3.446	0.051	RACA10	CTGAACCTGCTCAAGCCAGAACTTCAGACCCACTTTCTGATGATGGAGCCA	14	G	C	lm	ll	lm	ll	ll	ll	lm	ll	ll	lm	ll	lm	ll	ll	ll	lm	lm	lm	ll	ll	ll	ll	ll	lm	ll	lm	lm	ll	lm	lm	ll	ll	lm	lm	ll	lm	ll
12	2202	27036	<lmxll>		2	4.432	0.986	RACA10	NCTCTAAACATTTTCCACTCAGATAAAAGCTTTGGGATGTTTTCCGCTCCG	34	G	A	lm	ll	lm	ll	ll	ll	lm	ll	ll	lm	ll	lm	ll	ll	ll	ll	--	lm	ll	ll	ll	ll	ll	lm	--	lm	lm	--	lm	lm	ll	ll	lm	lm	ll	lm	ll
13	2199	27020	<lmxll>		2	4.497	0.065	RACA10	TCCTTCTTGTTCTGGTTCCATGAAAGTAGGAGGAGCTTCAATTTTCATTGT	27	A	C	lm	--	lm	ll	ll	ll	lm	ll	ll	lm	ll	lm	ll	ll	ll	ll	lm	lm	ll	ll	ll	ll	ll	lm	ll	lm	lm	ll	lm	lm	ll	ll	lm	lm	ll	lm	ll
14	2193	26920	<hkxhk>		2	4.607	0.11	RACA10	GATCTCAATCAGAGATTTACATCTTCCTCTTCTAAAATACGTCGTCTTGTT	11	G	A	hk	hh	hk	hk	hh	hh	hk	hk	hk	kk	hk	hk	--	hh	hh	hk	kk	hk	hk	hk	hk	hk	hk	hk	hh	hk	hk	hh	--	kk	hk	hh	kk	hk	hh	kk	hh
15	2187	26857	<hkxhk>		2	4.71	0.103	RACA10	AGGGACATATTTTTGTGATAAACATCCAAACGTTGGTACGAAGTTTCACTC	8	A	T	hk	hh	hk	hk	hh	hh	hk	hk	hk	kk	hk	hk	hh	hh	hh	hk	kk	hk	hk	hk	hk	hk	hk	hk	hh	hk	hk	hh	hk	kk	hk	hh	kk	hk	hh	kk	hh
16	2191	26904	<lmxll>		2	4.737	0.027	RACA10	CCAGAATCTTCTCCTCTCGCAGGAATCCAGGGAGGCGGTGATCTGGATGTC	36	G	A	lm	ll	lm	ll	ll	ll	lm	ll	ll	--	ll	lm	ll	ll	ll	ll	lm	lm	ll	ll	ll	ll	ll	lm	ll	lm	lm	ll	lm	lm	ll	ll	lm	lm	--	lm	ll
17	2185	26822	<lmxll>		2	4.863	0.126	RACA10	AAAGAGATGTAAATAGACATAAGGACATGTAAAGAGATATAAGGAGATATA	41	A	C	lm	ll	lm	ll	ll	ll	lm	ll	ll	--	ll	lm	ll	ll	ll	ll	lm	lm	ll	ll	ll	ll	ll	lm	ll	lm	lm	ll	lm	lm	ll	ll	lm	lm	ll	lm	ll
18	2157	26588	<nnxnp>		2	4.864	0.001	RACA10	GTATTCCGTTTGTCTACGTAACTATAAATAGTTGTGTTTTTCTAAACTTCC	6	C	T	nn	nn	nn	np	nn	nn	nn	np	np	np	np	np	nn	nn	nn	np	np	nn	np	np	np	np	np	nn	nn	nn	nn	nn	nn	np	nn	nn	np	nn	nn	np	nn
19	2200	27030	<nnxnp>		2	5.059	0.195	RACA10	TCTGACGAATGAATTGACTCGATGCACGGAGCTGTGAGACGTGTTTCCGTT	36	T	A	nn	nn	nn	np	nn	nn	nn	np	np	np	np	nn	nn	--	nn	np	np	nn	np	np	np	np	np	nn	nn	nn	nn	nn	nn	np	np	nn	np	nn	nn	np	nn
20	2201	27033	<efxeg>		2	5.126	0.067	RACA10	AAATATATAAAACTGACAATAATGGGAGTTTAGAGCAGTGACCCTTTAAAA	33	A	G	ef	ee	ef	eg	ee	ee	ef	eg	eg	--	eg	ef	ee	ee	ee	eg	fg	ef	eg	eg	eg	eg	eg	ef	ee	ef	ef	ee	ef	fg	eg	ee	fg	ef	ee	fg	ee
21	2188	26887	<hkxhk>		2	5.663	0.537	RACA10	TCTGAAAAAGTCTTCAAAGATTCTTAGCTGATATTTTTCTACCTCTGTCTG	7	A	T	hk	hh	hk	hk	hh	hh	hk	hk	hk	kk	hk	hk	hh	hh	hh	hk	kk	hk	hk	hk	hk	hk	hk	hk	hh	hk	hk	hh	hk	kk	hk	hh	kk	hk	hh	kk	hh
22	2196	26940	<hkxhk>		2	5.681	0.018	RACA10	GGAGATCATCACTGCTAAACCTGGAGATGACGTCATTCTGAGATGTAGAAA	10	A	T	hk	kk	hk	hk	kk	kk	hk	hk	hk	hh	hk	hk	kk	kk	kk	hk	hh	hk	hk	hk	hk	hk	hk	hk	kk	hk	hk	kk	hk	hh	hk	kk	hh	hk	kk	hh	kk
23	2186	26824	<hkxhk>		2	5.696	0.015	RACA10	CATTTCCAATGATGCTGGAACTGGATTCCTAATATAAAAAACAAAGAAAAC	37	A	G	hk	kk	hk	hk	kk	kk	hk	hk	hk	--	hk	hk	kk	kk	kk	hk	hh	hk	hk	hk	hk	hk	hk	hk	kk	hk	hk	kk	hk	hh	hk	kk	hh	hk	kk	hh	kk
24	5291	67174	<hkxhk>		2	5.697	0.001	sc00248	GCTGGGACTCACAGTCACACCAACTACAACCAGAAGTGACCAGAGGGTCCT	25	A	G	hk	--	hk	hk	hh	hh	hk	hk	hk	kk	hk	hk	hh	hh	hh	hk	kk	hk	hk	hk	hk	hk	hk	hk	hh	hk	hk	hh	hk	kk	hk	hh	kk	hk	hh	kk	hh
25	2183	26818	<nnxnp>		2	5.838	0.141	RACA10	NNNNAAGTGAGATTCAACGTTTCTCCTCTTGAGTAAGGAACATATGTAAGG	17	C	T	nn	nn	nn	np	nn	nn	nn	np	np	np	np	np	nn	nn	nn	np	np	nn	np	np	np	np	np	nn	nn	--	nn	nn	nn	np	np	nn	np	nn	nn	np	nn
26	2181	26816	<nnxnp>		2	5.888	0.05	RACA10	ATGGCAAAAAGCTGCTGTCTCTGACAGTCTAATAGTGCATTTCCACTTGTT	32	A	T	nn	nn	nn	np	nn	nn	nn	np	np	np	np	np	nn	nn	nn	np	np	nn	np	np	np	np	np	nn	nn	nn	nn	nn	nn	np	np	nn	np	nn	nn	np	--
27	2190	26902	<efxeg>		2	6.117	0.229	RACA10	GAGCCAAAACTCATCAGCTTCTCCCTGATGTTCGCAGTCTTCCATTCCTGT	13	C	T	ef	ee	--	eg	ee	ee	ef	eg	eg	--	eg	ef	ee	ee	ee	eg	fg	ef	eg	eg	eg	eg	eg	ef	ee	ef	ef	ee	ef	fg	eg	ee	fg	ef	ee	fg	ee
28	5431	69567	<efxeg>		2	6.162	0.045	sc00338	GGATCTGCAGAGATCAGAGCTGTCCTCAGACAGAATGTTCTCTGGATTCTC	22	T	A	ef	ee	ee	eg	ee	ee	ef	eg	eg	fg	eg	ef	ee	ee	ee	eg	--	ef	eg	eg	eg	eg	eg	ef	ee	ef	ef	ee	ef	fg	eg	ee	fg	ef	ee	fg	ee
29	4678	57934	<efxeg>		2	6.734	0.572	RACA15	TGAATCCTGAATCAAACCCAGTTTACTTCCATCAGAAGCAGAATGTTGGAC	3	T	A	ef	--	--	eg	ee	ee	ef	eg	eg	fg	eg	ef	ee	ee	ee	eg	fg	ef	eg	eg	eg	eg	eg	ee	ee	ef	ef	ee	ef	fg	eg	ee	fg	ef	--	fg	ee
30	2195	26937	<nnxnp>	2195	2	6.843	0.109	RACA10	ACACACTTCCTCACAGTAGTTGTGTTTGTCCAAACGTCTTTTTCACAACTT	8	C	T	nn	nn	nn	np	nn	nn	nn	np	np	np	np	nn	nn	nn	nn	np	np	nn	np	np	np	np	np	nn	nn	nn	nn	nn	nn	np	np	nn	np	nn	nn	np	nn
31	5433	69577	<nnxnp>	2195	2	6.843	0	sc00338	GATCAGGATATGGATTCCACTCGTGTTCAGCATTAACTTCTTCAGTGTTTG	8	T	C	nn	nn	nn	np	nn	nn	nn	np	np	np	np	nn	nn	nn	nn	np	np	nn	np	np	np	np	np	nn	nn	nn	nn	nn	nn	np	np	nn	np	nn	nn	np	nn
32	2182	26817	<nnxnp>		2	6.917	0.074	RACA10	GTTAAACAAGATCACAACACCTTTGATTTTACAACACCTATGGGAACTACC	22	T	C	nn	nn	nn	np	nn	nn	nn	np	np	np	np	np	nn	nn	nn	np	np	nn	np	np	np	np	np	nn	nn	nn	nn	nn	nn	np	np	nn	np	nn	nn	np	nn
33	2184	26819	<nnxnp>		2	7.089	0.172	RACA10	GATTCACTCGGGGTTAAGAAGAGACAAATTCTATTAGTGATTGAGAAAAGG	20	A	G	--	nn	nn	np	nn	nn	nn	np	np	np	np	np	nn	nn	nn	np	np	nn	np	np	np	np	np	nn	nn	nn	nn	nn	nn	np	np	nn	np	nn	nn	np	--
34	5468	70666	<nnxnp>		2	7.242	0.153	sc00634	GTAAGACTTCTACATTGGAGCTTTAGCTCCAGACCAGAGTTAATGTTGGAC	31	G	A	nn	nn	nn	np	nn	nn	nn	np	np	np	np	np	nn	nn	nn	np	np	nn	np	np	np	np	np	nn	nn	nn	nn	nn	nn	np	np	nn	np	nn	nn	np	nn
35	2175	26773	<hkxhk>		2	8.667	1.425	RACA10	ATTAGTATATCCATTCTAGTAAAGTGATTCCATTAATCCATTCGAGTAGAG	15	C	T	hk	hh	hk	hk	hh	hh	hk	hk	hk	kk	hk	--	hh	hh	hh	kk	kk	hk	hk	hk	hk	hk	hk	hk	hh	hk	hk	hh	hk	kk	hk	hh	kk	hk	hh	kk	hh
36	2180	26811	<nnxnp>		2	8.854	0.187	RACA10	CCTGCGATCATGACCAAACCTGCACTGAGAGGAGAGAGCGGACATCCTGGT	34	A	C	nn	nn	np	np	nn	nn	nn	np	np	np	np	np	nn	nn	nn	np	np	nn	np	np	np	np	np	nn	nn	nn	--	nn	--	np	np	nn	np	nn	nn	np	nn
37	5133	64619	<hkxhk>		2	9.27	0.416	sc00169	AGACAGCCCGCTTGGTTATGCATGGATTTCTTCAAAACTTTGATCAAAAAC	8	C	T	hk	hh	hk	hk	hh	hh	hk	hk	hk	kk	hk	kk	hh	hh	hh	hk	kk	hk	hk	hk	hk	hk	hk	hk	hh	hk	hk	hh	hk	kk	hk	hh	kk	hk	hh	kk	hh
38	5484	70951	<nnxnp>		2	9.602	0.332	sc00897	TTTAAACACTATAAACAGCATCAGTCTCATAGTTTTCTGATTTTCCTGGCA	34	T	C	nn	--	--	np	nn	nn	nn	np	np	np	np	np	nn	nn	nn	np	np	nn	np	np	np	np	np	nn	nn	nn	nn	nn	nn	np	np	nn	np	nn	nn	np	nn
39	2154	26569	<nnxnp>		2	10.348	0.746	RACA10	GACAAAGCAAAGCAGAGAAATGAAAATCACCAGAATGACTTTTGAGAATCT	12	T	C	nn	nn	nn	np	nn	nn	nn	np	np	np	np	np	nn	nn	nn	np	np	nn	np	np	np	--	np	nn	nn	nn	nn	nn	nn	np	--	nn	np	nn	nn	np	nn
40	2162	26634	<nnxnp>		2	10.614	0.266	RACA10	GCGTCTCCGAGCTGCAACAGAACAACCCTGGAAGACAAAGGACAGACGTGA	6	C	T	nn	nn	nn	np	nn	nn	nn	np	np	np	np	np	nn	nn	nn	np	np	nn	np	np	np	np	np	nn	nn	nn	nn	nn	nn	np	np	nn	np	nn	nn	np	nn
41	2161	26627	<nnxnp>		2	10.653	0.039	RACA10	CGCCTCAAGTACTTCCTGGAGCATCCCGCTGGCAACCGGATCATCCACCCT	26	T	C	nn	nn	--	np	nn	nn	nn	np	np	np	np	np	nn	nn	nn	np	np	nn	np	np	np	np	np	nn	nn	nn	nn	nn	--	np	np	nn	np	nn	nn	np	nn
42	2163	26646	<nnxnp>		2	10.839	0.186	RACA10	CCATAGGCAAGTAAATGTTATTTACAATTTTAATTTTTGTGTTTCTTTTTT	8	A	T	nn	nn	nn	np	nn	nn	nn	np	np	np	np	np	nn	nn	nn	--	np	nn	np	np	np	np	np	nn	nn	nn	nn	nn	--	np	np	nn	np	nn	nn	np	nn
43	2148	26542	<nnxnp>		2	12.265	1.426	RACA10	CTTCAAAACCAGAATATTCGGCTTGAATTTTGCTCATTTTCTCCTCACTCT	14	G	T	nn	nn	--	np	nn	nn	nn	np	np	np	np	np	nn	nn	nn	np	np	nn	np	np	np	nn	np	nn	nn	nn	nn	nn	nn	np	nn	nn	np	nn	nn	np	nn
44	2140	26499	<nnxnp>		2	13.771	1.506	RACA10	AATGTTTCACTTTTTACAGTGTAGCAGATGGGTCAAAGTTCCACCTGGTGT	5	G	T	nn	nn	--	np	nn	nn	nn	np	np	np	np	np	nn	nn	nn	np	np	nn	np	np	np	nn	np	nn	nn	nn	nn	nn	nn	np	nn	nn	np	nn	nn	np	nn
45	2143	26526	<lmxll>		2	16.766	2.995	RACA10	CTGAAGAAGTATTAAGATAATCTAATCATACACCAACATCTTTTATGTCTT	29	A	T	lm	lm	--	ll	lm	ll	lm	ll	lm	ll	lm	lm	ll	ll	ll	ll	lm	lm	ll	lm	ll	ll	lm	lm	ll	lm	lm	ll	--	lm	ll	ll	lm	lm	ll	ll	ll
46	2127	26341	<hkxhk>		2	19.972	3.206	RACA10	CAGTGAGGTGAGCCTCGCTTCCCAGCAGGGGGCGCTGGGCGCCCCGGTCGT	3	T	C	hk	hh	hk	hk	hk	hh	hk	hk	kk	hk	kk	kk	hh	hh	hh	kk	kk	hk	hk	kk	hk	hh	kk	hh	hh	hk	hk	--	hh	kk	hh	hh	kk	hk	hh	hh	hk
47	2126	26321	<hkxhk>		2	20.504	0.532	RACA10	TGTGTGATGACTAATCTGAAAGATTGTTAACTTGTGCTTTCTTATATGGTC	12	A	T	hk	hh	hk	hk	hk	hh	hk	hk	kk	hk	kk	kk	hh	hh	hh	kk	kk	hk	hk	kk	hk	hh	kk	hh	hh	hk	hk	hh	hh	kk	hh	hh	kk	hk	hh	hh	hk
48	2132	26380	<hkxhk>		2	20.683	0.179	RACA10	TCTTCAACTCTTTGGAAAAAAAGTCAGATTCCAACCAAAAGTGGAACACAA	20	A	T	hk	kk	--	hk	hk	kk	hk	hk	hh	hk	hh	hh	kk	kk	kk	hh	hh	hk	hk	hh	hk	kk	hh	kk	kk	hk	hk	kk	kk	hh	kk	kk	hh	hk	kk	hk	hk
49	2144	26530	<hkxhk>		2	22.976	2.293	RACA10	ATAGCAAAGAAACACCTTTGAGTCTTTTTGACATTTGCTGTTGATGCATGG	6	A	G	hk	hk	hk	hk	hk	hh	hk	hk	kk	hk	kk	kk	hh	hh	hh	kk	kk	hk	hk	kk	hk	hh	kk	hk	hh	hk	hk	hh	hh	kk	hh	hh	kk	hk	hh	hk	hh
50	2124	26270	<lmxll>		2	24.05	1.074	RACA10	CCTCTAGGCATGCACTGTTCAGGGGGAACCACCTCCCCCGCTTCGTCCGGA	20	A	G	lm	ll	lm	ll	lm	ll	lm	ll	lm	ll	lm	lm	ll	ll	ll	lm	lm	lm	ll	lm	ll	ll	lm	ll	ll	lm	lm	ll	ll	lm	ll	ll	lm	lm	ll	ll	lm
51	2145	26535	<hkxhk>		2	24.403	0.353	RACA10	ACTATTAGAGCAATTAATAGAAAATGGGAGAAGCTGAACATGACTGTCAGT	27	G	A	hh	kk	hk	hk	hk	kk	hk	hk	hh	hk	hh	hh	kk	kk	kk	hh	hh	hk	hk	hh	hk	kk	hh	hk	hk	hk	--	kk	kk	--	kk	kk	hh	hk	kk	hk	kk
52	2133	26381	<lmxll>		2	25.283	0.88	RACA10	GTGGGGGCTGCAGTCAAAGTGCTGCGTTTCAGAGCCTCGGAAACCAACAAA	38	G	A	lm	ll	lm	ll	lm	ll	lm	ll	lm	ll	lm	lm	ll	ll	ll	lm	lm	lm	ll	lm	ll	ll	lm	ll	ll	lm	lm	ll	ll	lm	ll	ll	lm	lm	ll	ll	lm
53	2121	26163	<lmxll>		2	25.512	0.229	RACA10	AGCTCATCATTGAAACTTCATTCTAATAAAAATTCGGAAGTTTTAAATATT	46	A	T	ll	lm	ll	lm	ll	lm	ll	lm	ll	lm	ll	ll	lm	lm	lm	ll	ll	ll	lm	ll	lm	lm	ll	lm	lm	ll	ll	lm	--	ll	lm	lm	ll	ll	lm	lm	ll
54	2112	26002	<nnxnp>		2	25.517	0.005	RACA10	AACTCATTTAGAAAAAAAAGTTGAGCATAAATACCTATTTATTTATTGTAC	21	T	C	np	np	np	np	np	np	np	nn	np	nn	nn	nn	np	np	np	nn	np	np	nn	nn	nn	np	nn	np	np	nn	np	np	np	nn	np	np	nn	np	np	np	np
55	2120	26154	<lmxll>		2	25.912	0.395	RACA10	AGTATGACCACGGTTTGTTTTGTATCCTGAAAAGCTTGGCTTTTGATACCA	39	C	G	ll	lm	ll	lm	ll	lm	ll	lm	ll	lm	ll	ll	lm	lm	lm	ll	ll	ll	lm	ll	lm	lm	ll	lm	lm	ll	ll	lm	lm	ll	lm	lm	ll	ll	lm	lm	ll
56	2105	25931	<nnxnp>		2	27.201	1.289	RACA10	TTTATACATTCCATCAAATGAGTTCTTTATTATTTAGTTCTATTGGGAATT	25	T	C	nn	nn	nn	nn	nn	nn	nn	np	nn	np	np	np	nn	nn	nn	np	nn	nn	np	np	np	nn	np	--	nn	np	nn	nn	--	np	nn	nn	np	nn	nn	nn	nn
57	2123	26262	<lmxll>		2	27.581	0.38	RACA10	ACAGGTTTAGGATGGTGGGCTTTGAAAGGCTTCACTTGAAAGTTAAAGATG	10	G	A	lm	ll	lm	ll	lm	ll	lm	ll	lm	ll	lm	lm	ll	ll	ll	lm	lm	lm	ll	lm	ll	ll	lm	ll	ll	lm	lm	ll	ll	lm	ll	ll	lm	lm	ll	ll	lm
58	2118	26144	<lmxll>		2	29.328	1.747	RACA10	ACAAAGACACAGGAAAGTTCCTTCTCAACTTCTCTGTTCTAAAAAAAATAA	8	A	G	ll	lm	ll	lm	ll	lm	ll	lm	ll	lm	ll	ll	lm	lm	lm	ll	ll	ll	lm	ll	lm	lm	ll	lm	lm	ll	ll	lm	lm	ll	lm	lm	ll	ll	ll	lm	ll
59	2099	25792	<nnxnp>		2	30.55	1.222	RACA10	TCACACACAGAGGTACTTCTTAGATAAATGGGTCATTTCACCGCATGTTAT	12	A	G	nn	nn	nn	nn	nn	nn	nn	np	nn	np	np	np	nn	np	nn	np	nn	nn	np	nn	np	nn	np	nn	nn	np	nn	nn	nn	np	nn	nn	np	nn	nn	nn	nn
60	2117	26138	<lmxll>		2	31.597	1.047	RACA10	CCTCGAGAGCTGTGGTGGTTGAAGTCCTTGCTGGAAAACACAGGCTTTCAA	22	A	G	ll	lm	ll	lm	ll	lm	ll	lm	ll	lm	ll	ll	lm	lm	lm	ll	ll	ll	lm	ll	lm	lm	ll	lm	lm	ll	ll	lm	lm	ll	lm	lm	ll	ll	ll	lm	ll
61	2097	25772	<nnxnp>		2	32.277	0.68	RACA10	TTAGAGAAATAGATGCTGTTTTAGTTCTTTATGTGGAGATCAGCTTTTTAG	27	C	T	nn	nn	nn	nn	nn	nn	nn	np	nn	np	np	np	nn	np	nn	np	nn	nn	np	nn	np	nn	np	nn	nn	np	np	nn	nn	np	nn	nn	np	nn	nn	nn	nn
62	2119	26151	<lmxll>	2119	2	33.522	1.245	RACA10	GATGGACTAAAATGAGAGAGTACATTAAAAAGAGTACGGATGGAAGCGAGT	6	C	G	ll	lm	ll	lm	ll	lm	ll	lm	ll	lm	ll	ll	lm	lm	lm	ll	ll	ll	lm	ll	lm	lm	ll	lm	lm	ll	ll	lm	lm	ll	lm	lm	ll	ll	lm	lm	ll
63	2122	26169	<lmxll>	2119	2	33.522	0	RACA10	CGAAAATCTTGCTCAAGGCTTTCACATCTCGATTCCGATACATGAAGGACT	14	A	C	ll	lm	ll	lm	ll	lm	ll	lm	ll	lm	ll	ll	lm	lm	lm	ll	ll	ll	lm	ll	lm	lm	ll	lm	lm	ll	ll	lm	lm	ll	lm	lm	ll	ll	lm	lm	ll
64	2094	25689	<nnxnp>		2	37.744	4.222	RACA10	TATTTTCCACAAAAAATGTATCTTGGCACACTGTGGGATTCCATCTAGTCG	16	T	G	np	nn	nn	nn	nn	nn	nn	np	nn	np	np	np	nn	np	nn	np	nn	nn	np	nn	np	nn	np	nn	nn	np	np	nn	--	np	nn	nn	np	nn	nn	nn	nn
65	2093	25684	<nnxnp>		2	38.914	1.17	RACA10	GAGAGGTTTTGGGCAGACCCCAAACTAAAGAATGTACATTATTCTCTATCA	31	A	T	np	nn	nn	nn	nn	nn	nn	np	nn	np	np	np	nn	np	nn	np	nn	nn	np	nn	np	nn	np	nn	nn	np	np	nn	nn	np	nn	nn	np	nn	nn	nn	nn
66	2092	25683	<nnxnp>		2	39.173	0.259	RACA10	GCTGGAACCGGCTGGGAGACGATGTGAAAAAAAAGCAGAAAACAGAACCTT	8	A	C	np	nn	nn	nn	nn	nn	nn	np	nn	np	np	np	nn	np	nn	np	nn	nn	np	nn	np	nn	np	nn	nn	np	np	nn	nn	np	nn	nn	np	nn	nn	nn	nn
67	2087	25641	<nnxnp>		2	40.725	1.552	RACA10	GGGGCAGCGTTACGCAGTGGGACGCAATCCAGCCTTTCTGCATCGGCCCCT	45	A	G	np	nn	nn	nn	nn	nn	--	np	nn	np	np	np	np	np	nn	np	nn	nn	np	nn	np	nn	np	nn	nn	np	np	nn	nn	np	nn	nn	np	nn	nn	nn	nn
68	2267	27816	<nnxnp>		2	44.041	3.316	RACA10	ATTACATGTTCTTGTAGAATCTTTATCATGTTGGAAAACGAATATGAGTNN	13	G	A	np	nn	--	nn	nn	nn	nn	np	nn	np	np	np	np	np	nn	np	nn	nn	np	nn	np	nn	np	nn	nn	np	np	nn	--	np	nn	nn	np	nn	nn	nn	nn
69	2261	27710	<lmxll>		2	47.009	2.968	RACA10	GCAACCGATTGTGTTTCACTTTGATATTTCACCCTTTAGAAGTTTATCGAT	13	T	C	ll	ll	lm	lm	ll	lm	ll	lm	ll	lm	ll	ll	ll	lm	lm	--	ll	ll	ll	ll	ll	lm	ll	lm	ll	ll	ll	lm	--	ll	lm	lm	ll	ll	ll	lm	ll
70	2263	27743	<lmxll>		2	47.172	0.163	RACA10	CTAATCCAACGTCGAGGAAGGAACATTGCTGTGAAGAGTTGGGAATAAAAG	8	A	G	ll	ll	lm	lm	ll	lm	ll	lm	ll	lm	ll	ll	ll	lm	lm	ll	ll	ll	ll	ll	ll	lm	ll	lm	ll	ll	ll	lm	lm	ll	lm	lm	ll	ll	ll	lm	ll
71	2096	25750	<hkxhk>		2	47.568	0.396	RACA10	TTACAGCCAGTCAGTGACAGATAGACCAACAAAAGACAAAAAAATAAAGAG	28	A	G	kk	hk	hh	hh	hk	hh	hk	hk	hk	hk	kk	kk	hk	hk	hh	kk	hk	hk	hk	hk	hk	hh	kk	hh	hk	kk	kk	hh	hh	kk	hh	hh	kk	hk	hk	hh	hk
72	2265	27765	<nnxnp>		2	47.802	0.234	RACA10	GGGGCTTTATTTTTCGCTTTTTGCAGACTTAAGACTTGTATTGTCGACCGC	44	C	T	np	nn	nn	nn	nn	nn	nn	np	nn	np	np	np	np	np	nn	nn	nn	np	np	nn	np	nn	np	nn	nn	np	np	nn	nn	np	nn	nn	np	nn	nn	nn	nn
73	2241	27523	<nnxnp>		2	48.948	1.146	RACA10	GTGGTGTAAAATGGGGAGAAATCTCAGTTTTATCCTTTTTGTGCTGAACAG	22	T	C	np	nn	--	nn	nn	nn	nn	np	nn	np	np	np	np	np	nn	nn	nn	np	np	nn	np	nn	np	nn	nn	np	np	nn	nn	np	nn	nn	np	nn	nn	nn	nn
74	2237	27500	<hkxhk>		2	49.114	0.166	RACA10	GCTGCTGCAGGGCTGCAACCTGAAAAATACAAGGCTAACTTCTGGAATTNN	3	G	C	hk	hk	hh	hk	kk	hk	kk	hh	kk	hh	hk	hk	hk	hh	hk	kk	kk	hk	hk	kk	hk	hk	hk	hk	kk	hk	hk	--	hk	hk	hk	hk	hk	kk	kk	hk	kk
75	2243	27532	<nnxnp>		2	49.192	0.078	RACA10	CGCTTCCTTTTTCATTTTCTGCAGCCTTCACATTTGTCAGCACTCCCGTCA	47	G	A	np	nn	np	nn	nn	nn	nn	np	nn	np	np	np	np	np	nn	nn	nn	np	np	nn	np	nn	np	nn	nn	np	np	nn	nn	np	nn	nn	np	nn	nn	nn	nn
76	2248	27544	<efxeg>		2	49.46	0.268	RACA10	GTGACGTAATACAGTAAATTCTATGGTTTCTGTGAATCTGTATCCACTTGA	11	C	G	fg	ef	--	ee	ef	ee	ef	eg	ef	eg	fg	fg	fg	eg	ee	ef	ef	fg	fg	ef	--	ee	fg	ee	ef	fg	fg	ee	--	fg	ee	ee	fg	ef	ef	ee	ef
77	2249	27547	<nnxnp>		2	49.751	0.291	RACA10	TGAATGACTCGCATGATGCTACTTTAGATTGAATGGAAACAGAACCTTCTG	5	G	C	np	nn	np	nn	nn	nn	nn	np	nn	np	np	np	np	np	nn	nn	nn	np	np	nn	np	nn	np	nn	nn	np	np	nn	nn	np	nn	nn	np	nn	nn	nn	nn
78	2247	27543	<lmxll>		2	50.042	0.291	RACA10	TTGCTTTCATTCTACAATACCAGTGCCGAACTCAATTTTCTGTGAAGGTTG	26	C	T	lm	lm	--	ll	lm	ll	lm	ll	lm	ll	lm	lm	lm	ll	ll	lm	lm	lm	lm	lm	lm	ll	lm	ll	lm	lm	lm	ll	ll	lm	ll	ll	lm	lm	lm	ll	lm
79	2239	27505	<lmxll>		2	50.145	0.103	RACA10	GGTTTTAAAAAAATATTGACAGATCCTCCAGTTGGTTAAGATCACATTAAA	36	T	C	lm	lm	--	ll	lm	ll	lm	ll	lm	ll	lm	lm	lm	ll	ll	lm	lm	lm	lm	lm	lm	ll	lm	ll	lm	lm	lm	ll	ll	lm	ll	ll	lm	lm	lm	ll	lm
80	2240	27518	<hkxhk>	2240	2	50.508	0.363	RACA10	ATGTACAAAACTTGCGTTGAAAGTTAAACCGGGTCAAATTTTGACCAATCA	38	T	C	kk	hk	hk	hh	hk	hh	hk	hk	hk	hk	kk	kk	kk	hk	hh	hk	hk	kk	kk	hk	kk	hh	kk	hh	hk	kk	kk	hh	hh	kk	hh	hh	kk	hk	hk	hh	hk
81	2244	27537	<hkxhk>	2240	2	50.508	0	RACA10	TCCTTCTTCTGCAGCAGAAAGACTGACAGCCCAGCGGAGCGACGCACGGAC	7	T	A	kk	hk	hk	hh	hk	hh	hk	hk	hk	hk	kk	kk	kk	hk	hh	hk	hk	kk	kk	hk	kk	hh	kk	hh	hk	kk	kk	hh	hh	kk	hh	hh	kk	hk	hk	hh	hk
82	2242	27529	<lmxll>		2	50.616	0.108	RACA10	ACAGTCTTGACCCTGGTGTCCTTCGACAGCTCTTTGGTCTCGGTGGACAGA	9	A	G	lm	lm	--	ll	lm	ll	lm	ll	lm	ll	lm	lm	lm	ll	ll	lm	lm	lm	lm	lm	lm	ll	lm	ll	lm	lm	lm	ll	ll	lm	ll	ll	--	lm	lm	ll	lm
83	2251	27571	<lmxll>		2	53.144	2.528	RACA10	TACTTTAGATTCCTCCTTTTGTGTTTATGTGAAATTATTGTGTATTTTTTG	8	A	C	lm	lm	ll	ll	lm	ll	lm	ll	lm	ll	lm	lm	lm	ll	ll	lm	lm	lm	lm	lm	lm	ll	lm	ll	lm	lm	lm	ll	ll	lm	ll	ll	lm	lm	lm	ll	lm
84	2250	27564	<lmxll>		2	53.154	0.01	RACA10	CCTAGATCCATTCTAAGTCCGTGAATCAGATTGTTCAAAATGCACCATTAT	19	C	A	lm	lm	--	ll	lm	ll	lm	ll	lm	ll	lm	lm	lm	ll	ll	lm	lm	lm	lm	lm	lm	ll	lm	ll	lm	lm	lm	ll	ll	lm	ll	ll	lm	lm	lm	ll	lm
85	2088	25643	<lmxll>	2088	2	53.164	0.01	RACA10	GTGTCTAAAGCCACCAACAGCAATGAAAAAAAAGGACTTGAGGAAAATATA	28	A	C	lm	lm	ll	ll	lm	ll	lm	ll	lm	ll	lm	lm	lm	ll	ll	lm	lm	lm	lm	lm	lm	ll	lm	ll	lm	lm	lm	ll	ll	lm	ll	ll	lm	lm	lm	ll	lm
86	2252	27582	<lmxll>	2088	2	53.164	0	RACA10	TCCCCTCAGATCGGGTCCGGCCTTGCATCAGCACAGAATGCGGTTGACGGC	20	C	G	lm	lm	ll	ll	lm	ll	lm	ll	lm	ll	lm	lm	lm	ll	ll	lm	lm	lm	lm	lm	lm	ll	lm	ll	lm	lm	lm	ll	ll	lm	ll	ll	lm	lm	lm	ll	lm
87	2253	27594	<lmxll>	2088	2	53.164	0	RACA10	GCTTTGTTATGATAAACAAAGACCCTTATGCCGCTGTTGGCTGTCTGACAG	17	A	G	lm	lm	ll	ll	lm	ll	lm	ll	lm	ll	lm	lm	lm	ll	ll	lm	lm	lm	lm	lm	lm	ll	lm	ll	lm	lm	lm	ll	ll	lm	ll	ll	lm	lm	lm	ll	lm
88	2272	27840	<lmxll>	2088	2	53.164	0	RACA10	CATCAAGCTAGAACCAAACAGCAACAAATCTAACAACATTCTTTATTTTCC	29	C	G	lm	lm	ll	ll	lm	ll	lm	ll	lm	ll	lm	lm	lm	ll	ll	lm	lm	lm	lm	lm	lm	ll	lm	ll	lm	lm	lm	ll	ll	lm	ll	ll	lm	lm	lm	ll	lm
89	2256	27617	<lmxll>		2	53.189	0.025	RACA10	GATGAGTGATGCTGCTGCTTAGACCAAGAACAGAGGAGAACGAGGAGCTGA	19	T	C	lm	lm	ll	ll	lm	ll	lm	ll	lm	ll	lm	lm	lm	ll	ll	lm	lm	lm	lm	lm	lm	ll	lm	ll	lm	lm	lm	ll	ll	lm	ll	ll	lm	lm	lm	ll	lm
90	2235	27437	<nnxnp>		2	53.749	0.56	RACA10	TCTCAGCGCCGGATGAAAACAAAGGAGAGATCCCCGAGGGCAACTTTAGCC	40	C	A	np	nn	--	nn	nn	nn	nn	np	nn	np	np	np	np	np	nn	nn	nn	np	np	nn	np	nn	np	--	nn	np	np	nn	nn	np	nn	nn	np	nn	nn	nn	np
91	2254	27612	<hkxhk>		2	54.109	0.36	RACA10	ATTAGAAACAACACATAGATAGTATGTTTATTACAAATTATAGATTTTATT	42	G	T	hk	kk	--	hk	kk	hk	kk	hh	kk	hh	hk	hk	hk	hh	hk	kk	kk	hk	hk	kk	hk	hk	hk	hk	kk	hk	hk	hk	hk	hk	hk	hk	hk	kk	kk	hk	kk
92	2233	27401	<nnxnp>		2	54.836	0.727	RACA10	TTAATTCTAGTTTTAACGTAATTTTAATTATGATTTAATGTTTTTACTGTA	6	C	T	np	nn	--	nn	nn	nn	np	np	nn	np	np	np	np	np	nn	nn	nn	np	np	nn	np	nn	np	nn	nn	np	np	nn	--	np	nn	nn	np	nn	nn	nn	np
93	2095	25720	<lmxll>		2	56.424	1.588	RACA10	GAGGCATGATGCATGTTTACTCCTGGCGCCTTTCTGGTATTTTGCACAAAG	3	G	A	lm	lm	ll	ll	lm	ll	lm	ll	lm	ll	lm	lm	lm	ll	ll	lm	lm	lm	ll	lm	ll	ll	lm	ll	lm	lm	lm	ll	ll	lm	ll	ll	lm	lm	lm	ll	lm
94	2222	27287	<nnxnp>		2	57.989	1.565	RACA10	CTGCTCGTCACACAGATGTGTCTGAGCGCACATCCAGATAGAGGAGTTTAA	11	A	T	np	nn	np	nn	nn	np	np	np	nn	np	np	np	np	np	nn	nn	nn	np	np	nn	np	nn	np	nn	nn	np	np	nn	--	np	nn	nn	np	nn	nn	nn	np
95	2101	25865	<lmxll>		2	58.009	0.02	RACA10	CGACNNTGTTAAATTTTCCAAATTAAAATAAAACATTTTCATTAACAATAC	18	C	A	lm	lm	ll	ll	lm	ll	lm	ll	lm	ll	lm	lm	lm	ll	ll	lm	lm	lm	ll	lm	ll	ll	lm	ll	lm	--	lm	ll	ll	--	ll	ll	lm	lm	lm	ll	lm
96	2223	27295	<nnxnp>	2223	2	58.027	0.018	RACA10	TTTGTCACATCAAGTCTAGCAGTAAATGTTTCTCTAATCACACAAACTTTG	36	G	A	np	nn	np	nn	nn	np	np	np	nn	np	np	np	np	np	nn	nn	nn	np	np	nn	np	nn	np	nn	nn	np	np	nn	nn	np	nn	nn	np	nn	nn	nn	np
97	5446	70235	<nnxnp>	2223	2	58.027	0	sc00419	TTCTGATCTTTGCGTCGTTTAGTAATAAATCTTCTATGGGTCCTACTTGGT	26	A	G	np	nn	np	nn	nn	np	np	np	nn	np	np	np	np	np	nn	nn	nn	np	np	nn	np	nn	np	nn	nn	np	np	nn	nn	np	nn	nn	np	nn	nn	nn	np
98	2103	25904	<lmxll>		2	58.391	0.364	RACA10	GTTTCAAACAGCATTTTTTGTCAGTCCGGATTCACAACAATTTGAATAAAG	23	G	C	lm	lm	ll	ll	lm	ll	lm	ll	lm	ll	lm	lm	lm	ll	ll	lm	lm	lm	ll	lm	ll	ll	lm	ll	lm	lm	lm	ll	ll	lm	ll	ll	lm	lm	lm	ll	lm
99	2264	27756	<nnxnp>		2	62.093	3.702	RACA10	TTTTTTTAAGGTTGATTTAAGCTAAAAAGTCTTCTTGCTTTAGGTAGCATC	26	A	G	nn	np	np	np	np	np	np	nn	np	nn	nn	nn	nn	nn	np	np	np	nn	nn	np	nn	np	nn	np	np	nn	nn	np	--	nn	np	np	nn	np	np	np	np
100	2212	27185	<nnxnp>		2	65.204	3.111	RACA10	GAAGGCAAAGAGCTGTCATACAGCACTAACTCAGCTGGAGGAGACGCACAG	43	G	A	nn	np	nn	np	np	nn	nn	nn	np	--	nn	nn	nn	nn	np	np	np	nn	nn	np	nn	np	nn	np	np	nn	nn	np	np	nn	np	np	nn	np	np	np	nn
101	2224	27307	<nnxnp>		2	65.933	0.729	RACA10	CTAAAATGAAAGACATAAAACCTCTATTCCAAACAGATATTGAATTGTGGG	14	A	C	nn	np	--	np	np	nn	nn	nn	np	nn	nn	nn	nn	nn	np	np	np	nn	nn	np	nn	np	nn	np	np	nn	nn	np	np	nn	np	np	nn	np	np	np	nn
102	2229	27361	<nnxnp>		2	65.965	0.032	RACA10	TAGAATGTGAACATTTCTCAGCGTTCATGCAACAAAAACAAAAACAANNNN	25	C	T	nn	np	--	np	np	nn	nn	nn	np	nn	nn	nn	nn	nn	np	np	np	nn	nn	np	nn	np	nn	np	np	nn	nn	np	--	nn	np	np	nn	np	np	np	nn
103	2226	27321	<nnxnp>		2	66.054	0.089	RACA10	GCACCCAAGTACTTTGGATCTGTCGTCCCTTCCGTAGCAGTCTAGTGTGCT	26	C	G	nn	np	nn	np	np	nn	nn	nn	np	nn	nn	nn	nn	nn	np	np	np	nn	nn	np	nn	np	nn	np	np	nn	nn	np	np	nn	np	np	nn	np	np	np	nn
104	2225	27313	<nnxnp>		2	66.081	0.027	RACA10	ACTGCCCAGACTACGGGTCTCTAGGCAGTAGACCTTGCTAGATGCCGCTGN	22	G	A	nn	np	nn	np	np	nn	nn	nn	np	nn	nn	nn	nn	nn	np	np	np	nn	nn	np	nn	np	nn	np	np	nn	nn	np	np	nn	np	np	nn	np	np	np	nn
105	2219	27270	<nnxnp>		2	67.636	1.555	RACA10	GGCCACCATTGAAACATCTGAAGAAATGGACCAACTCATGGAAACTGTGTC	31	A	C	nn	np	--	np	np	nn	nn	nn	np	nn	nn	nn	nn	nn	np	np	np	nn	nn	np	nn	np	nn	np	np	nn	nn	np	--	nn	np	np	nn	np	np	np	nn
106	2218	27269	<nnxnp>		2	67.64	0.004	RACA10	GATCACTGAGACAGTTTGATGGATTTACTGAAGTCTCATAACTGTTGCCCG	17	A	G	--	np	--	np	np	nn	nn	nn	np	nn	nn	nn	nn	nn	np	np	np	nn	nn	np	nn	np	nn	np	np	nn	--	np	np	nn	np	np	nn	np	np	np	nn
107	2230	27366	<nnxnp>	2230	2	67.656	0.016	RACA10	TGTTTTGCTGTCTATTACTCTTCGTTCTAAGTTTCAGAACCATCAGAAGTG	18	T	C	nn	np	nn	np	np	nn	nn	nn	np	nn	nn	nn	nn	nn	np	np	np	nn	nn	np	nn	np	nn	np	np	nn	nn	np	np	nn	np	np	nn	np	np	np	nn
108	2232	27391	<nnxnp>	2230	2	67.656	0	RACA10	CTCTTCACCATAATGGACCGGGACAATGGTGGACTCTACTGCTTTCCACCT	19	G	A	nn	np	nn	np	np	nn	nn	nn	np	nn	nn	nn	nn	nn	np	np	np	nn	nn	np	nn	np	nn	np	np	nn	nn	np	np	nn	np	np	nn	np	np	np	nn
109	5325	67899	<nnxnp>	2230	2	67.656	0	sc00271	GCTTTTATTTTGAAAATATGAAAACTGAAGGGATGTAATGACCTGAAAATA	44	G	A	nn	np	nn	np	np	nn	nn	nn	np	nn	nn	nn	nn	nn	np	np	np	nn	nn	np	nn	np	nn	np	np	nn	nn	np	np	nn	np	np	nn	np	np	np	nn
110	5469	70670	<nnxnp>		2	67.753	0.097	sc00636	GCAGGGTTATTTAGGTCTACTTATTTAGTTAAAACCAAGGAAACTGTCGTG	37	A	G	nn	np	--	np	np	nn	nn	nn	np	--	nn	nn	nn	nn	np	np	np	nn	nn	np	nn	np	nn	np	np	--	nn	np	--	nn	np	np	nn	np	np	np	nn
111	2204	27108	<nnxnp>		2	71.492	3.739	RACA10	GCTGTGGTGGGCGGAGCCAAAATGAGATGTCTGCTATTAGAAATCCAATGA	23	G	T	nn	np	--	np	np	nn	nn	nn	np	nn	nn	nn	nn	nn	np	np	np	nn	nn	np	nn	np	nn	np	np	nn	nn	np	np	nn	np	np	nn	np	np	np	nn
112	2205	27124	<nnxnp>	2205	2	71.613	0.121	RACA10	GATCGCAATTGAGGATTTATGTAAAATTAAACACATTATACAAAGGAGTTG	9	G	T	nn	np	nn	np	np	nn	nn	nn	np	nn	nn	nn	nn	nn	np	np	np	nn	nn	np	nn	np	nn	np	np	nn	nn	np	np	nn	np	np	nn	np	np	np	nn
113	2206	27128	<nnxnp>	2205	2	71.613	0	RACA10	TATTTTCAAGCTAGCAGAAGTCACTTGAGAGAAAAAAACTGACTCCAAGCT	6	T	C	nn	np	nn	np	np	nn	nn	nn	np	nn	nn	nn	nn	nn	np	np	np	nn	nn	np	nn	np	nn	np	np	nn	nn	np	np	nn	np	np	nn	np	np	np	nn
114	2208	27154	<nnxnp>	2205	2	71.613	0	RACA10	ATTAACATTTAATGTTTTTTTTTTATTTTCATGGAGTTATTACTCACACTT	17	T	C	nn	np	nn	np	np	nn	nn	nn	np	nn	nn	nn	nn	nn	np	np	np	nn	nn	np	nn	np	nn	np	np	nn	nn	np	np	nn	np	np	nn	np	np	np	nn
115	2209	27156	<nnxnp>	2205	2	71.613	0	RACA10	TTTTCTTTGCATCAAACAAAACTTCCGCTGCAATTGGGAACGTATCAAACA	22	T	A	nn	np	nn	np	np	nn	nn	nn	np	nn	nn	nn	nn	nn	np	np	np	nn	nn	np	nn	np	nn	np	np	nn	nn	np	np	nn	np	np	nn	np	np	np	nn
116	2207	27147	<nnxnp>		2	71.713	0.1	RACA10	TATAGATAAGAAGGCACAAGACGAATTAGACATTTAAAAAGCATTTAAAGG	22	C	G	nn	np	nn	np	np	nn	nn	nn	np	nn	nn	nn	nn	nn	np	np	np	nn	nn	np	nn	np	nn	np	np	nn	nn	np	--	nn	np	np	nn	np	np	np	nn
117	2203	27103	<nnxnp>		2	72.043	0.33	RACA10	CCAGCTGCTGATTAGCTCAGTCAGATTTTTTCACATTCTGAGTGAATGAAA	24	T	A	nn	np	--	np	np	nn	nn	nn	np	nn	nn	nn	nn	--	--	np	np	nn	nn	np	nn	np	nn	np	np	nn	nn	--	np	--	np	np	nn	np	np	np	nn
1	301	3364	<lmxll>		3	0		RACA11	AAACTTGAAATTTATAATTAAAGAGGTTGTTTCTCTGACTTTACCTTAACT	16	A	T	ll	ll	ll	lm	lm	ll	lm	ll	ll	lm	lm	lm	lm	ll	ll	ll	lm	lm	ll	lm	lm	lm	lm	lm	ll	ll	ll	lm	ll	lm	lm	lm	lm	lm	ll	ll	lm
2	366	4019	<nnxnp>		3	0.082	0.082	RACA11	TTAGTCATGTGGTTTGTTTACAAGCTTTTGTGTGGAACACAAATGTCCACT	8	G	C	nn	nn	--	nn	np	np	nn	nn	np	nn	nn	nn	np	nn	np	nn	nn	nn	nn	nn	nn	nn	nn	np	nn	nn	np	nn	--	--	nn	nn	nn	nn	np	nn	np
3	302	3366	<lmxll>		3	0.738	0.656	RACA11	TTGCTTTTGCCAGTACTATAACAAATAATGTCAACGTGAATCTTTTTAATA	15	C	G	ll	ll	--	lm	lm	ll	lm	ll	ll	lm	lm	lm	lm	ll	ll	ll	lm	lm	ll	lm	lm	lm	lm	lm	ll	ll	ll	lm	--	lm	lm	lm	lm	lm	ll	ll	lm
4	295	3327	<efxeg>		3	2.057	1.319	RACA11	CAACAATAACGCCGGCGGATCTGCCGCCCCTTTGTTGCACTCAAACAAGCG	7	A	G	ee	ee	eg	ef	fg	eg	ef	ee	eg	ef	ef	ef	fg	ee	eg	ee	ef	ef	ee	ef	ef	ef	ef	fg	ee	ee	eg	fg	eg	--	ef	ef	ef	ef	eg	ee	fg
5	5532	71895	<lmxll>		3	2.922	0.865	sc06225	ACGTATTTTTTACTAAACGTTCCGTCTTTCCTGCGTTATACTCTCGGAAAT	18	G	A	ll	lm	ll	lm	lm	ll	lm	ll	ll	lm	lm	lm	lm	ll	ll	ll	lm	lm	ll	lm	lm	lm	lm	lm	ll	ll	ll	lm	ll	lm	lm	lm	lm	lm	ll	ll	lm
6	292	3295	<nnxnp>		3	3.067	0.145	RACA11	TAAGATTCTTCAAAACCAAAGAGCCAGAATGTAAAAATAAAAGAGCCACAT	15	T	C	nn	nn	np	nn	np	np	nn	nn	np	nn	nn	nn	np	nn	np	nn	nn	nn	nn	nn	nn	nn	nn	np	nn	nn	np	np	np	np	nn	nn	nn	nn	np	nn	np
7	289	3255	<efxeg>		3	3.156	0.089	RACA11	GCTCCTTTGACTTTCCCATGGTAGCATTTGTGGGTGTGTGATTCTAATGAG	15	A	C	ee	ef	eg	ef	fg	eg	ef	ee	eg	ef	ef	ef	fg	ee	eg	ee	ef	ef	ee	ef	ef	ef	ef	fg	ee	ee	eg	fg	eg	fg	ef	ef	ef	ef	eg	ee	fg
8	291	3294	<efxeg>		3	3.687	0.531	RACA11	CTAAAGTCCCACTATGTCGATTTTTCTATCCTAAAATCATTCCCAGTGATC	15	A	G	ee	ef	eg	ef	fg	eg	ef	ee	eg	ef	ef	ef	fg	ee	eg	ee	ef	ef	ee	ef	ef	ef	ef	fg	ee	ee	eg	fg	eg	fg	ef	ef	ef	ef	eg	ee	fg
9	297	3329	<efxeg>		3	4.75	1.063	RACA11	TTTCAGGCAACAGACTTTTCTCCGTCCTCCACTCTGTGCTCTCCACACAGT	4	A	C	ee	--	eg	ef	fg	eg	ef	ee	eg	ef	ef	ef	fg	ee	eg	ee	ef	ef	ee	ef	ef	ef	ef	fg	ee	ee	eg	fg	eg	fg	ef	ef	ef	ef	eg	ee	fg
10	288	3246	<nnxnp>		3	5.083	0.333	RACA11	GGATCTCATTTGCAGCGCTGACCTGACTGAAGGCCAGCTTGTAGATGTGTT	44	T	A	nn	nn	np	nn	np	np	nn	nn	np	nn	nn	nn	np	nn	np	nn	nn	nn	nn	nn	nn	nn	nn	np	nn	nn	np	np	np	np	nn	nn	nn	nn	np	nn	np
11	190	2278	<lmxll>		3	5.566	0.483	RACA11	TACGGTCAGGAAATAGACTCCAGCTCCAGAGCAGCTCCGCTTCATGATCCG	27	A	G	ll	lm	ll	lm	lm	ll	lm	ll	ll	lm	lm	lm	lm	ll	ll	ll	lm	lm	ll	lm	lm	lm	lm	lm	ll	ll	ll	--	ll	lm	lm	lm	lm	lm	ll	ll	lm
12	314	3471	<lmxll>		3	5.875	0.309	RACA11	GCGTTTTCTTTGTTATTCATGTTTTTCTTCGGTGTGTTTTTTGGACGTTCG	9	T	C	ll	lm	ll	lm	lm	ll	lm	ll	ll	lm	lm	lm	lm	ll	ll	ll	lm	lm	ll	lm	lm	lm	lm	lm	ll	ll	ll	ll	--	lm	lm	lm	lm	lm	ll	ll	lm
13	315	3472	<lmxll>		3	5.876	0.001	RACA11	GAATATTCTAAGAGCTGAAGAGCTACGAACGTCCAAAAAACACACCGAAGA	4	A	G	ll	lm	ll	lm	lm	--	lm	ll	ll	lm	lm	lm	lm	ll	ll	ll	lm	lm	ll	lm	lm	lm	lm	lm	ll	ll	ll	ll	ll	lm	lm	lm	lm	lm	ll	ll	lm
14	178	2213	<lmxll>	178	3	5.882	0.006	RACA11	CAAGGGTAATTTCCAAGCGAACCAACAGCCATGAAGTTTTGTAGAGCTATC	40	G	T	ll	lm	ll	lm	lm	ll	lm	ll	ll	lm	lm	lm	lm	ll	ll	ll	lm	lm	ll	lm	lm	lm	lm	lm	ll	ll	ll	ll	ll	lm	lm	lm	lm	lm	ll	ll	lm
15	213	2558	<lmxll>	178	3	5.882	0	RACA11	TTGTGTTTAGAGCTCTTCAAAACATATAAACCCAAGCTACTCGCTCAACAT	47	A	G	ll	lm	ll	lm	lm	ll	lm	ll	ll	lm	lm	lm	lm	ll	ll	ll	lm	lm	ll	lm	lm	lm	lm	lm	ll	ll	ll	ll	ll	lm	lm	lm	lm	lm	ll	ll	lm
16	236	2767	<lmxll>	178	3	5.882	0	RACA11	CTGTAAAGAGGAGATCGTCTTAAAGGGAAGAGGAAGGTTTGCTCTGTTTCA	31	G	A	ll	lm	ll	lm	lm	ll	lm	ll	ll	lm	lm	lm	lm	ll	ll	ll	lm	lm	ll	lm	lm	lm	lm	lm	ll	ll	ll	ll	ll	lm	lm	lm	lm	lm	ll	ll	lm
17	191	2291	<lmxll>		3	5.974	0.092	RACA11	CAGTCTCTGAGCCTCTACTGGAAAACATGTTTCTCATCTGGGATCTGGAGA	12	C	A	ll	lm	ll	lm	lm	ll	lm	ll	ll	lm	lm	lm	lm	ll	ll	ll	lm	lm	ll	lm	lm	lm	lm	lm	ll	ll	--	ll	--	lm	lm	lm	lm	lm	ll	ll	lm
18	210	2537	<lmxll>	210	3	7.011	1.037	RACA11	CATGGAAACTGCAAACGAGCTGTTCTGATGCCAGACTTTTAATTTGAAATC	9	T	C	ll	lm	ll	lm	lm	ll	lm	ll	ll	lm	lm	lm	lm	ll	ll	ll	lm	lm	ll	lm	lm	lm	lm	lm	ll	ll	ll	ll	ll	lm	lm	lm	lm	lm	ll	ll	lm
19	290	3267	<lmxll>	210	3	7.011	0	RACA11	GAAGGCAGAGCTGCCACCAACAAATTCGAAGGAGCCACGCGGCTCGGCGTG	44	C	T	ll	lm	ll	lm	lm	ll	lm	ll	ll	lm	lm	lm	lm	ll	ll	ll	lm	lm	ll	lm	lm	lm	lm	lm	ll	ll	ll	ll	ll	lm	lm	lm	lm	lm	ll	ll	lm
20	5384	68918	<lmxll>		3	7.042	0.031	sc00304	NAATTCAGGACTGTAAGCTAACTTATAAACAATCTTTGCATTTCTCGATGA	37	G	T	ll	lm	ll	lm	lm	ll	lm	ll	--	lm	lm	lm	lm	ll	ll	ll	lm	lm	ll	lm	lm	lm	lm	lm	ll	ll	ll	ll	ll	lm	lm	lm	lm	lm	ll	ll	lm
21	5170	64988	<lmxll>		3	7.052	0.01	sc00187	GACATCACATTAATGGGGGGGGTCTCATGGTTCTCCCTGTCATCCATTGGG	47	T	C	--	lm	ll	lm	lm	ll	lm	ll	ll	lm	lm	lm	lm	ll	ll	ll	lm	lm	--	lm	lm	lm	lm	lm	ll	ll	ll	ll	ll	lm	lm	lm	lm	lm	ll	ll	lm
22	185	2247	<nnxnp>		3	7.654	0.602	RACA11	GATGGTTTTCAGTGATCAGTCTGATGCAGATCCAGACGTTTCACATCCAAA	37	A	G	nn	nn	--	nn	np	np	nn	nn	np	nn	nn	nn	np	nn	np	nn	nn	nn	nn	nn	nn	nn	nn	np	nn	nn	np	np	np	np	nn	nn	nn	nn	np	nn	np
23	171	2173	<hkxhk>		3	7.698	0.044	RACA11	GTGGAGACTAAAGATCACAGGACGGTTGATGTGGATCTAAACTTTCACAGG	21	A	G	hk	hh	kk	hh	hk	kk	hh	hk	kk	hh	hh	hh	hk	hk	kk	hk	hh	hh	hk	hh	hh	hh	hh	hk	hk	hk	kk	kk	--	hk	hh	hh	hh	hh	kk	hk	hk
24	323	3545	<hkxhk>		3	7.73	0.032	RACA11	ATTCCAGTGAACCACATCCATTACAGTTAGTTGGATCTATCTTAATAATCC	22	A	C	hk	kk	hh	kk	hk	hh	kk	hk	hh	kk	kk	kk	hk	hk	hh	hk	kk	kk	hk	kk	kk	kk	kk	hk	hk	hk	hh	hh	hh	hk	kk	kk	kk	kk	hh	hk	hk
25	300	3363	<nnxnp>		3	8.654	0.924	RACA11	CATAGTTTTCTAGAGGAAAAAAGAAAAGAATGAAATTATTATAACAGCTAC	15	A	G	nn	nn	--	nn	np	np	nn	nn	np	nn	nn	--	np	nn	np	nn	nn	nn	nn	nn	--	nn	nn	np	np	nn	np	np	--	np	nn	nn	nn	nn	np	nn	np
26	235	2765	<lmxll>		3	11.167	2.513	RACA11	TCCTAAAATGATTTCTAGAAGTTCTCCTTTATCAGCTGGTCATAAAAAGTC	38	G	A	lm	ll	lm	ll	ll	lm	ll	lm	lm	ll	ll	ll	ll	lm	lm	lm	ll	ll	lm	ll	ll	ll	ll	ll	lm	lm	lm	lm	lm	ll	ll	ll	ll	ll	lm	lm	ll
27	353	3895	<lmxll>		3	11.272	0.105	RACA11	AGGGGTCTTCCTTCCGGGTCCTACAAGAGTTCACAAAAATAACTCATATTT	45	A	T	lm	ll	--	ll	--	lm	ll	lm	lm	ll	ll	ll	ll	lm	lm	lm	ll	ll	lm	ll	ll	ll	ll	ll	lm	lm	lm	lm	lm	ll	ll	ll	ll	ll	lm	lm	ll
28	197	2407	<lmxll>	197	3	11.626	0.354	RACA11	TTACTCGTGTACACACAGACCCTTTCCAAAAACCTCAGAATATCATGCAAA	46	G	T	lm	ll	lm	ll	ll	lm	ll	lm	lm	ll	ll	ll	ll	lm	lm	lm	ll	ll	lm	ll	ll	ll	ll	ll	lm	lm	lm	lm	lm	ll	ll	ll	ll	ll	lm	lm	ll
29	200	2423	<lmxll>	197	3	11.626	0	RACA11	GATTCAAGTCTGACCTCTGGAGCGACCGGCGGCGCCGGCCTGGAGATCCAA	23	G	A	lm	ll	lm	ll	ll	lm	ll	lm	lm	ll	ll	ll	ll	lm	lm	lm	ll	ll	lm	ll	ll	ll	ll	ll	lm	lm	lm	lm	lm	ll	ll	ll	ll	ll	lm	lm	ll
30	238	2802	<nnxnp>		3	13.278	1.652	RACA11	TAACAGCAAGTTTCCGATGGCGGTGTGATCGTAGCTTCAGAGCTAGCCTTC	46	T	C	np	np	nn	np	--	nn	np	np	nn	np	np	np	nn	np	nn	np	np	np	np	np	np	np	np	nn	np	np	nn	nn	nn	nn	np	np	np	np	nn	np	--
31	186	2253	<nnxnp>		3	13.29	0.012	RACA11	GAATCGGGCCCCCGGACCTTTACTTTGACACATGTGCATCAGACGAAATGT	20	G	T	np	np	nn	np	nn	nn	np	np	nn	np	np	np	nn	np	--	np	np	np	np	np	np	np	np	nn	np	np	nn	nn	--	nn	np	np	np	np	nn	np	nn
32	195	2342	<nnxnp>	195	3	13.297	0.007	RACA11	CTGCTTCAGCCACAAAAGTAAAACTTCTTAATCAAACTGCTTTCACGGTTG	14	A	T	np	np	nn	np	nn	nn	np	np	nn	np	np	np	nn	np	nn	np	np	np	np	np	np	np	np	nn	np	np	nn	nn	nn	nn	np	np	np	np	nn	np	nn
33	5172	65011	<nnxnp>	195	3	13.297	0	sc00187	CTGTTGAAGGGCAGAACCACATGCCATCCCAGTTCAAAATGCAGTTCAAAG	24	T	C	np	np	nn	np	nn	nn	np	np	nn	np	np	np	nn	np	nn	np	np	np	np	np	np	np	np	nn	np	np	nn	nn	nn	nn	np	np	np	np	nn	np	nn
34	5383	68917	<nnxnp>	195	3	13.297	0	sc00304	GAATTCCTTCATATAGTCAACTGCACAGCAGGTTATTTAGTATGAGAAAGT	26	A	G	np	np	nn	np	nn	nn	np	np	nn	np	np	np	nn	np	nn	np	np	np	np	np	np	np	np	nn	np	np	nn	nn	nn	nn	np	np	np	np	nn	np	nn
35	5169	64986	<nnxnp>		3	13.302	0.005	sc00187	GCTCCTTCATCACAGCAGAAGAGCGAAGAGTTTAGGAGCAGAAACAGCAGC	24	G	C	np	np	nn	np	nn	nn	np	np	nn	np	np	np	nn	np	nn	np	np	np	np	np	np	np	np	nn	np	np	nn	nn	nn	nn	np	np	np	np	nn	np	nn
36	318	3499	<efxeg>		3	13.45	0.148	RACA11	GAACAAACTTCCGCTGGATCAGGAACGGACACATCGACTGAGAAACCTCAA	11	C	T	fg	eg	ef	eg	ee	ef	eg	fg	ef	eg	eg	eg	ee	fg	ef	fg	eg	eg	fg	eg	eg	eg	eg	ee	fg	fg	ef	ef	--	ee	eg	eg	eg	eg	ef	fg	ee
37	199	2422	<lmxll>		3	14.054	0.604	RACA11	TTGCATCATGTTTGAAAGTCTCTTCAGCTGCTGCTGGAAGATTCCAGGAGA	33	C	T	lm	ll	lm	ll	ll	lm	ll	lm	lm	ll	ll	ll	ll	lm	lm	lm	ll	ll	lm	ll	ll	ll	ll	ll	lm	lm	lm	lm	lm	ll	ll	ll	ll	ll	lm	lm	ll
38	335	3650	<nnxnp>		3	21.446	7.392	RACA11	NAATTCTGCTCAATCCCACACAATAGCATGGCCTGTGTCTGTGCTGCAGAC	30	G	C	np	np	--	np	nn	nn	np	np	nn	np	np	np	nn	np	nn	np	nn	np	np	np	np	nn	np	nn	nn	np	--	nn	--	nn	np	nn	np	np	nn	np	nn
39	343	3765	<hkxhk>		3	26.185	4.739	RACA11	GGTTAGTAATCTGGATTAATATATCAGATAAAACTTCAAACAATCTTATAT	16	T	G	hk	hk	--	hk	hk	hh	kk	hk	hh	kk	kk	kk	hk	hk	hh	hk	hk	kk	hk	kk	kk	hk	kk	hk	hh	hk	hh	hk	hh	hk	hk	hh	kk	kk	hh	kk	hk
40	341	3733	<nnxnp>		3	26.633	0.448	RACA11	TGTTTTGTTGTGGTACAGAGTATGAGGCTCGGTGTAGTGTGCTGCCAACTA	14	G	A	np	np	nn	np	nn	nn	np	np	nn	np	np	np	nn	np	nn	np	nn	np	np	np	np	nn	np	nn	nn	np	nn	nn	nn	nn	np	nn	np	np	nn	np	nn
41	329	3616	<nnxnp>		3	27.27	0.637	RACA11	CTTAACCTTTTCATTTAGTGATGCGCCTTCTTCTCTGTGTCTGTGCGTCTC	24	G	T	np	np	--	np	nn	nn	np	np	nn	np	np	np	nn	np	nn	np	nn	np	np	np	np	nn	np	nn	nn	np	nn	nn	nn	nn	np	nn	np	np	nn	np	nn
42	326	3582	<nnxnp>		3	27.402	0.132	RACA11	TAATAAATGTCAAATTGGCCAAAAAGCTAGCAGAATACTATTATAACTTTC	38	T	C	np	np	nn	np	nn	nn	np	np	nn	np	np	np	nn	np	nn	np	nn	np	np	np	np	nn	np	nn	nn	np	nn	nn	nn	nn	np	nn	np	np	nn	np	nn
43	332	3633	<nnxnp>		3	27.522	0.12	RACA11	GAAAAAGTTAACAATAAAAGAATTTTAAATGAAATTGTAAGATTTTTTTTT	42	T	A	np	np	nn	np	nn	nn	np	np	nn	np	np	np	nn	np	nn	np	nn	np	np	np	np	nn	np	nn	nn	np	nn	nn	--	nn	np	nn	np	np	nn	np	nn
44	330	3623	<nnxnp>		3	27.53	0.008	RACA11	CACCTTACAATGATAATTGGTCCTCTTGCTTAATGTTCACGCCCATCTAAT	9	A	T	--	np	--	np	nn	nn	np	np	nn	np	np	np	nn	np	nn	np	nn	np	np	np	np	nn	np	nn	nn	np	nn	nn	nn	nn	np	nn	np	np	nn	np	nn
45	331	3624	<nnxnp>		3	27.631	0.101	RACA11	CCTCAAGAGCTGTGATGTTTTGGGGCTTTTGCTGCAACACAGACTTTTGGA	19	T	C	np	np	--	np	nn	nn	np	np	nn	np	np	np	nn	np	nn	--	nn	np	np	np	np	nn	np	nn	nn	np	nn	nn	--	nn	np	nn	np	np	nn	np	nn
46	342	3752	<lmxll>		3	27.649	0.018	RACA11	GTGAGTAGTTGTGTATAGAAGACTTAGACGTGAAGAATTGATGCTGTTTTG	23	T	C	lm	lm	lm	lm	ll	lm	ll	lm	lm	ll	ll	ll	ll	lm	lm	lm	ll	ll	lm	ll	ll	ll	ll	ll	lm	lm	lm	ll	lm	ll	lm	lm	ll	ll	lm	ll	ll
47	324	3559	<hkxhk>		3	28.26	0.611	RACA11	GCTTTGGCTGCTATTGATTTCCAAGTATTTTTCCTTAAGAGTGCACAAAGC	25	T	C	hk	hk	--	hk	hk	kk	hh	hk	kk	hh	hh	hh	hk	hk	kk	hk	hk	hh	hk	hh	hh	hk	hh	hk	kk	hk	kk	hk	--	hk	hk	kk	hh	hh	kk	hh	hk
48	340	3700	<nnxnp>		3	30.028	1.768	RACA11	CACGTTCACACAAAGAAAACAAGTCCAAATATTTTGTTTCAAAATGTATGA	39	C	G	np	np	nn	np	nn	nn	np	np	nn	np	np	np	nn	np	nn	np	nn	np	np	np	np	nn	np	nn	nn	np	nn	nn	nn	nn	np	nn	np	np	nn	np	nn
49	358	3933	<hkxhk>		3	33.198	3.17	RACA11	TCATCGTAGCTGTCGCCATTTGTTCTCGCAGACATCTCAGACCGGTAATGT	29	A	G	kk	kk	hk	kk	hh	hk	hk	kk	hh	hk	hk	hk	hh	hk	hk	--	hh	hk	hk	kk	hk	hh	hk	hh	hk	kk	hh	hh	--	hh	kk	hk	hk	hk	hk	hk	hh
50	357	3929	<nnxnp>		3	34.91	1.712	RACA11	TAGAAGCTGAAAGCACTATCTCCTCTCTTATTCATGAAGACAAAAAGCCAA	24	G	C	nn	nn	--	nn	np	np	nn	nn	np	nn	nn	np	np	np	np	nn	np	nn	nn	nn	nn	np	nn	np	np	nn	np	np	np	np	nn	np	nn	nn	np	nn	np
51	356	3927	<nnxnp>		3	34.936	0.026	RACA11	AAGTAAGCTAACGGGTAAAGATTTATGTCCCTGATTGTTCTTTACCACTAT	4	A	G	np	np	nn	np	nn	nn	np	np	nn	np	np	nn	nn	--	nn	np	nn	np	np	np	np	nn	np	nn	nn	np	nn	nn	nn	nn	np	nn	np	np	nn	np	nn
52	349	3858	<lmxll>		3	34.963	0.027	RACA11	AAAGCCACATCACGGTACAATGACAAGCACATATAAAAACCTAAGGTACAA	31	T	C	lm	lm	lm	lm	ll	lm	--	lm	lm	ll	ll	lm	ll	lm	lm	lm	ll	ll	ll	ll	ll	ll	ll	ll	lm	lm	ll	ll	lm	ll	lm	lm	ll	ll	lm	ll	ll
53	351	3884	<hkxhk>		3	35.45	0.487	RACA11	TAATTCATCTGAGTTTCATTGTCCTACGACTTCACTCTCTTCAACGTTTTC	13	T	A	hh	hh	hk	hh	kk	hk	hk	hh	kk	hk	hk	hk	kk	hk	hk	hh	kk	hk	hk	hk	hk	kk	hk	kk	hk	hh	kk	kk	hk	kk	hh	hk	hk	hk	hk	hk	kk
54	352	3885	<efxeg>		3	36.126	0.676	RACA11	ACGACAGTTTTTTTTTCTTCTTTTTTGTTGTAGAGTTCTTTCAAACTCTAT	16	C	T	--	--	ef	fg	ee	ef	eg	fg	ee	eg	eg	ef	ee	ef	ef	fg	ee	eg	eg	eg	eg	ee	eg	ee	ef	fg	ee	ee	ef	ee	fg	ef	eg	eg	ef	eg	ee
55	361	3956	<nnxnp>		3	37.709	1.583	RACA11	TAGACACATTTTCATAAACCATTGGAAGCAGGAACGGGGTTTTGGTGTGGT	35	A	G	np	np	nn	np	nn	nn	np	np	nn	np	np	nn	nn	nn	nn	np	nn	np	np	np	np	nn	np	nn	nn	np	nn	nn	nn	nn	np	nn	np	np	nn	np	nn
56	364	3983	<nnxnp>		3	37.927	0.218	RACA11	GAAGCTAGCTTTTACCTAGATGATTATCTGACTTATTTGAATTATCAACAT	27	C	G	np	np	nn	np	nn	nn	np	np	nn	np	np	nn	nn	nn	nn	np	nn	np	np	np	np	nn	np	nn	nn	np	nn	nn	--	nn	np	nn	np	np	nn	np	nn
57	362	3968	<hkxhk>		3	41.258	3.331	RACA11	TCTCTTTTTTGTAGCCGGTTTTTGAAATATTCTAGGGCAGGGAATCGATTG	35	G	A	hk	hk	--	hk	hk	hh	kk	kk	hk	kk	kk	hh	hk	hh	hh	hk	hk	kk	kk	hk	kk	hk	kk	hk	hh	hk	--	hk	--	hk	hk	hh	kk	kk	hh	kk	hk
58	4783	59411	<lmxll>		3	42.037	0.779	RACA12	TGGAGTTTCTGGGTTCCCAACGGACTCTTGCATCCTTCATCTAGAGCTGCA	15	C	A	ll	ll	--	ll	lm	ll	lm	ll	lm	lm	lm	ll	ll	ll	ll	ll	lm	--	lm	ll	lm	lm	lm	lm	lm	ll	lm	--	ll	lm	ll	ll	lm	lm	ll	lm	ll
59	2870	34998	<lmxll>		3	43.284	1.247	RACA31	CTGTAGTGGTTGCACCAGGCATTGCATTAAAATGTGTTTATTTGAATAAAC	28	A	C	lm	ll	ll	ll	lm	ll	lm	lm	lm	ll	lm	ll	ll	ll	ll	ll	lm	lm	lm	ll	lm	lm	lm	lm	lm	ll	lm	lm	ll	--	ll	ll	lm	lm	ll	lm	ll
60	286	3236	<lmxll>		3	45.242	1.958	RACA11	GTTGCTTACAATGTGCATGCTAGGATAACAACCTGGAGGGCCAACGGAACC	25	T	G	lm	ll	--	ll	lm	ll	lm	lm	lm	lm	lm	ll	ll	ll	ll	ll	lm	lm	lm	ll	lm	lm	lm	lm	lm	ll	lm	lm	ll	lm	ll	ll	lm	lm	ll	lm	ll
61	180	2221	<nnxnp>		3	45.625	0.383	RACA11	GAGCCCCAACTCCACCTACTGCTTCTCTGTGACGGCTGTTTACGGCTCTGC	33	A	G	np	np	nn	np	nn	nn	nn	np	nn	np	np	nn	nn	nn	nn	np	nn	np	np	np	np	nn	np	np	nn	np	nn	nn	nn	nn	np	nn	np	np	nn	np	nn
62	4785	59426	<lmxll>		3	46.582	0.957	RACA12	TTAATCCTTGAAACATATTTGAGATGATAGTAGGCTGATTTTGTGACCGTC	28	A	T	lm	ll	ll	ll	lm	ll	lm	lm	lm	lm	lm	ll	ll	--	ll	ll	lm	lm	lm	ll	lm	lm	lm	lm	lm	ll	lm	lm	ll	lm	ll	ll	lm	lm	ll	lm	ll
63	4776	59297	<lmxll>	4776	3	46.697	0.115	RACA12	CCAAAAGGTTTCCTCATGATTGTATCTGCACAGTGTGGATGTTTTGTGCAG	44	T	A	lm	ll	ll	ll	lm	ll	lm	lm	lm	lm	lm	ll	ll	ll	ll	ll	lm	lm	lm	ll	lm	lm	lm	lm	lm	ll	lm	lm	ll	lm	ll	ll	lm	lm	ll	lm	ll
64	5408	69297	<lmxll>	4776	3	46.697	0	sc00321	TTGGCGGCGGCTCCAAACTCCTCGTGTCTGCAGGTCAGAAAATTAGAGATN	20	C	A	lm	ll	ll	ll	lm	ll	lm	lm	lm	lm	lm	ll	ll	ll	ll	ll	lm	lm	lm	ll	lm	lm	lm	lm	lm	ll	lm	lm	ll	lm	ll	ll	lm	lm	ll	lm	ll
65	5463	70545	<lmxll>		3	46.922	0.225	sc00536	GTCTCCTAAGAGGGAACCCTTATCTGGTTTACTGTTCCATCTGGTAGAGGT	18	C	T	lm	ll	ll	ll	lm	ll	lm	lm	lm	lm	lm	ll	ll	ll	ll	ll	lm	lm	lm	ll	lm	lm	lm	lm	lm	ll	lm	lm	ll	lm	ll	ll	lm	lm	ll	lm	ll
66	179	2216	<nnxnp>		3	47.357	0.435	RACA11	AAAGGTGATAAAAACCCAAACGTCCCAAGAGGCAACCAGAGCAAGCGCAGA	45	C	T	np	np	nn	np	nn	nn	nn	np	nn	--	np	nn	np	nn	nn	np	--	np	np	np	np	nn	np	np	nn	np	nn	nn	nn	nn	np	nn	np	np	nn	np	nn
67	182	2225	<hkxhk>		3	47.616	0.259	RACA11	GGAGCCGCACGGCGCTCCTCTCCCTGTTGCTCTAGCGTTGCTGCAAGCCAG	37	T	C	hk	hk	kk	hk	hk	kk	hk	hh	hk	hh	hh	kk	hk	kk	kk	hk	hk	hh	hh	hk	hh	hk	hh	hh	kk	hk	hk	hk	kk	hk	hk	kk	hh	hh	kk	hh	kk
68	175	2200	<hkxhk>		3	47.616	0	RACA11	TCTGAAGACAACTGACATGACGGAGGAGGAGCAGCGGTTAGAGTTTGGCTC	21	G	A	hk	hk	hh	hk	hk	hh	hk	kk	hk	kk	kk	hh	hk	hh	hh	hk	hk	kk	kk	hk	kk	hk	kk	kk	hh	hk	hk	hk	hh	hk	hk	hh	kk	kk	hh	kk	hh
69	174	2188	<hkxhk>		3	47.653	0.037	RACA11	AGTAAAATGTGTCTATCTCACACTAAAAAGAGGCTTAAATATGGAGTTTAA	3	A	C	hk	hk	hh	hk	hk	hh	hk	kk	hk	kk	kk	hh	hk	hh	hh	hk	hk	kk	kk	hk	kk	hk	kk	kk	hh	hk	hk	hk	hh	hk	hk	hh	kk	kk	hh	kk	hk
70	5365	68651	<lmxll>		3	47.881	0.228	sc00294	AAAAAGCAATTTTAGCTTTGTTTGTTCAGGAAAAACAAAATCACAAAAAGC	12	T	C	lm	ll	ll	ll	lm	ll	lm	lm	lm	lm	lm	ll	ll	ll	ll	ll	lm	lm	lm	ll	lm	lm	lm	lm	lm	ll	lm	lm	ll	lm	ll	ll	lm	lm	ll	lm	ll
71	5366	68655	<lmxll>		3	48.419	0.538	sc00294	CATATGACAAGCTAAATGTACTTTTAAGGCATAACTTTTTCCACATGTTTC	10	G	A	lm	ll	ll	ll	lm	ll	lm	lm	lm	lm	lm	ll	ll	ll	ll	ll	lm	lm	lm	ll	lm	lm	lm	lm	lm	ll	lm	lm	ll	lm	ll	ll	lm	lm	ll	lm	ll
72	221	2631	<lmxll>		3	49.872	1.453	RACA11	GCCACAAGAATCGTGTTCGGTGGGAATGCACCTTTAGAGTGTGTTGGTTGC	44	T	A	lm	ll	ll	ll	lm	ll	lm	lm	lm	lm	lm	ll	ll	ll	ll	ll	lm	lm	lm	ll	lm	lm	lm	lm	ll	ll	lm	lm	ll	lm	ll	ll	lm	lm	ll	lm	ll
73	282	3174	<lmxll>		3	50.556	0.684	RACA11	TTTACCTTGATGCCTGTCATTTTTCTTGGCAGGAGTAACAGTGGTTCATAG	12	C	A	lm	ll	ll	ll	lm	ll	lm	lm	lm	lm	lm	ll	ll	--	ll	ll	lm	lm	lm	ll	lm	lm	lm	lm	lm	ll	lm	lm	--	lm	ll	ll	lm	lm	ll	lm	ll
74	209	2533	<lmxll>		3	51.204	0.648	RACA11	AGAATCCGAGCTGTTATCCAGCTAAAATCTGCATCTGGTCCAAATTCTACC	6	C	T	lm	ll	ll	ll	lm	ll	lm	lm	lm	lm	lm	ll	ll	ll	ll	ll	lm	lm	lm	ll	lm	lm	lm	lm	ll	ll	lm	lm	ll	lm	ll	ll	lm	lm	--	lm	ll
75	212	2547	<hkxhk>		3	52.538	1.334	RACA11	CCTCAAAGCCTGTGCGATGCATCCGTGTGAAGAGGCCCGGGTTTCAGCATA	24	G	A	kk	hk	--	hk	hk	hh	hk	kk	hk	kk	kk	hh	hh	hh	hh	hh	hk	hk	kk	hk	kk	hk	kk	kk	hh	hh	hk	hk	hh	hk	hk	hh	kk	kk	hh	hk	hh
76	217	2594	<hkxhk>		3	52.681	0.143	RACA11	CTATTTAAACTGAGTAGATGTATAAACTTTTTTTTGATGCTTTCTTGAATA	5	T	A	kk	hk	hh	hk	hk	hh	hk	kk	hk	kk	kk	--	hh	hh	hh	hh	hk	hk	kk	hk	kk	hk	kk	kk	hh	hh	hk	hk	hh	hk	hk	hh	kk	kk	hh	hk	hh
77	3509	42879	<lmxll>		3	53.326	0.645	RACA13	AGTGTCCCCTGGAACTTGACTTTCATGACTTTATTTGTTACAACATTCTGA	7	C	A	ll	lm	lm	lm	ll	lm	ll	ll	ll	ll	ll	lm	lm	lm	lm	lm	ll	ll	ll	lm	ll	ll	ll	lm	ll	lm	ll	ll	lm	ll	lm	lm	ll	ll	lm	ll	lm
78	279	3158	<lmxll>	279	3	53.365	0.039	RACA11	CTTCGGTCGCTGGCCCAAATGTGTCCACCCTAGTGTTAACCACTGTGCAGT	29	C	A	ll	lm	--	lm	ll	lm	ll	ll	ll	ll	ll	lm	lm	lm	lm	lm	ll	ll	ll	lm	ll	ll	ll	ll	ll	lm	ll	ll	lm	ll	lm	lm	ll	ll	lm	ll	lm
79	287	3242	<lmxll>	279	3	53.365	0	RACA11	CTTGTTTATCGACTTCTGCACACTGACTTTAATTACATTTTACAGCACAGC	47	C	T	ll	lm	--	lm	ll	lm	ll	ll	ll	ll	ll	lm	lm	lm	lm	lm	ll	ll	ll	lm	ll	ll	ll	ll	ll	lm	ll	ll	lm	ll	lm	lm	ll	ll	lm	ll	lm
80	225	2688	<lmxll>		3	53.432	0.067	RACA11	CTTTTAGTGGTCATTGAGAAACAGCAAAACTTGGTTCTTCTTGTGGAGTTG	41	T	C	lm	ll	ll	ll	lm	ll	lm	lm	lm	lm	lm	ll	ll	ll	ll	ll	lm	lm	lm	ll	lm	lm	lm	lm	ll	ll	lm	lm	ll	lm	ll	ll	lm	lm	ll	lm	ll
81	231	2727	<lmxll>		3	53.845	0.413	RACA11	AGTGAAAACAAAAACAGCGATGTGCTTGCCGGTGCCTTTGTAGAGCTCTCC	36	T	C	lm	ll	--	ll	lm	ll	lm	lm	lm	lm	lm	ll	ll	--	ll	ll	lm	lm	lm	ll	lm	lm	lm	lm	ll	ll	lm	lm	ll	lm	ll	ll	lm	lm	ll	lm	ll
82	251	2930	<lmxll>		3	53.853	0.008	RACA11	GAATTCTATTAATGCCAATCCTCCACAGTGAATTAAACCCTGCGGTTTCCT	24	A	T	ll	lm	lm	lm	ll	lm	ll	ll	ll	ll	ll	lm	lm	lm	lm	lm	ll	ll	ll	lm	ll	ll	ll	ll	lm	lm	ll	ll	lm	ll	lm	lm	ll	ll	lm	ll	lm
83	243	2847	<lmxll>		3	53.878	0.025	RACA11	GGAGGAAATCTTTGGCATACTGCTGGGATTTAAACACAAAAAAAAAAAAAA	43	A	G	ll	lm	lm	lm	ll	lm	ll	ll	ll	ll	ll	lm	lm	lm	lm	lm	ll	ll	ll	lm	ll	ll	ll	ll	lm	lm	ll	ll	lm	ll	lm	lm	ll	ll	lm	ll	lm
84	256	2970	<lmxll>		3	54.19	0.312	RACA11	GCAAACAAAAAATCACTTGCAAGTTGTGATATTTCTGTTTTAGTTTCCTTT	18	G	T	ll	lm	lm	lm	ll	lm	ll	ll	ll	ll	ll	lm	lm	lm	lm	lm	ll	ll	ll	lm	ll	ll	ll	ll	lm	lm	ll	ll	lm	ll	lm	lm	ll	ll	lm	ll	lm
85	5519	71651	<lmxll>		3	54.427	0.237	sc03130	ATTTGACAGTTGTGTCAACAAAAGCCCAATGATTCAAGCCCAGCAGCACAT	37	G	A	ll	lm	lm	lm	ll	lm	ll	ll	ll	ll	ll	lm	lm	lm	lm	lm	ll	ll	ll	lm	ll	ll	ll	ll	ll	lm	ll	ll	lm	ll	lm	lm	ll	ll	lm	ll	lm
86	4766	59214	<lmxll>		3	54.443	0.016	RACA12	NAATTCCAATCTTATTCAAGAGGAACCAGAATCTCCACGGATTAAAGAGGA	13	A	G	ll	lm	lm	lm	ll	lm	ll	ll	ll	ll	ll	lm	lm	lm	lm	lm	ll	ll	ll	lm	ll	ll	ll	ll	ll	lm	ll	ll	lm	ll	lm	lm	ll	ll	lm	ll	lm
87	4770	59228	<lmxll>		3	54.629	0.186	RACA12	GGATGAGAGATTTGATAGGAAAAAAGAGCCAGTTAGCAGTGCAGGTAACTC	40	G	C	ll	lm	lm	lm	ll	lm	ll	ll	ll	ll	ll	lm	lm	lm	lm	lm	ll	ll	ll	lm	ll	ll	ll	ll	ll	lm	ll	ll	lm	ll	lm	lm	ll	ll	lm	ll	lm
88	5421	69452	<lmxll>		3	54.731	0.102	sc00330	GCCGCGGGTGCTGTTGTAGCGCGCAGGACCGCTCTAGCTTCATGTGCTTAT	30	G	A	ll	lm	lm	lm	ll	lm	ll	ll	ll	--	ll	lm	lm	lm	lm	lm	ll	ll	ll	lm	ll	ll	ll	ll	ll	lm	ll	ll	lm	ll	lm	lm	ll	ll	lm	ll	lm
89	283	3200	<lmxll>		3	54.75	0.019	RACA11	NAATTCAAAACAATCGGCAAAAAGTCACTCTTAAATGGGAGTGAAATGATA	47	G	A	ll	lm	--	lm	ll	lm	ll	ll	ll	ll	ll	lm	lm	lm	lm	lm	ll	ll	ll	lm	ll	ll	ll	ll	ll	--	--	ll	lm	ll	lm	lm	ll	ll	lm	ll	lm
90	4786	59464	<lmxll>	4786	3	54.757	0.007	RACA12	GTTTAATGGAAACAGCACAACAATAATCTTCCTGGCTTGTAATTTTTAACT	17	C	T	ll	lm	lm	lm	ll	lm	ll	ll	ll	ll	ll	lm	lm	lm	lm	lm	ll	ll	ll	lm	ll	ll	ll	ll	ll	lm	ll	ll	lm	ll	lm	lm	ll	ll	lm	ll	lm
91	4800	59714	<lmxll>	4786	3	54.757	0	RACA12	TAGACAGGAATCCTCCTGGGCTTCTGTGGTTGAATGTTACCGAAGCTTCTA	32	A	G	ll	lm	lm	lm	ll	lm	ll	ll	ll	ll	ll	lm	lm	lm	lm	lm	ll	ll	ll	lm	ll	ll	ll	ll	ll	lm	ll	ll	lm	ll	lm	lm	ll	ll	lm	ll	lm
92	4764	59207	<lmxll>		3	54.784	0.027	RACA12	GTGGAAGCTTCTGATCCCAGGCGTTGACAAACACTGGAGCTTTTAAGAAAA	23	T	C	ll	lm	--	lm	ll	lm	ll	ll	ll	ll	ll	lm	lm	lm	lm	lm	ll	ll	ll	lm	ll	ll	ll	ll	ll	lm	--	--	lm	ll	lm	lm	ll	ll	lm	ll	lm
93	239	2809	<lmxll>		3	54.812	0.028	RACA11	ACCAGAACTGTTGCTATAAAATTAGGAAAATCAGACAAAATCCTGATGTTT	23	A	G	lm	ll	ll	ll	lm	ll	lm	lm	lm	lm	lm	ll	ll	ll	ll	ll	lm	lm	lm	ll	lm	lm	lm	lm	ll	ll	lm	lm	ll	lm	ll	ll	lm	lm	ll	lm	ll
94	214	2560	<lmxll>		3	55.034	0.222	RACA11	AAATGAAGAAAAACCCAAACATACACAGTCAAAATTATCTCGCTCCAAATT	22	A	G	lm	--	ll	ll	lm	ll	lm	lm	lm	lm	lm	ll	ll	ll	ll	ll	lm	lm	lm	ll	lm	lm	lm	lm	ll	ll	lm	lm	ll	lm	ll	ll	lm	lm	ll	lm	ll
95	2197	26964	<lmxll>		3	55.336	0.302	RACA10	GGGACGTTTCTTCAGCGGAGATACCTTTAAAAAGCCCAGGATCTTCTTACT	34	C	T	lm	ll	ll	ll	lm	ll	lm	lm	lm	lm	lm	ll	ll	ll	ll	ll	lm	lm	lm	ll	lm	lm	lm	lm	lm	ll	lm	lm	ll	lm	ll	ll	lm	lm	ll	lm	ll
96	5413	69325	<lmxll>		3	55.896	0.56	sc00321	ACTCATAATGATTCCAAACAACAGAAGAACAGAGTTTAATATTTAGAACTT	16	A	G	ll	lm	lm	lm	ll	lm	ll	ll	ll	ll	ll	lm	lm	lm	lm	lm	ll	ll	ll	lm	ll	ll	ll	ll	ll	lm	ll	ll	lm	ll	lm	lm	ll	ll	lm	ll	lm
97	3520	42933	<lmxll>		3	56.741	0.845	RACA13	CAGCACTTAAAGACTTGACAGACCAATACTCAGAAGCTCCTAAATCTGTTT	22	C	T	ll	lm	--	lm	ll	lm	ll	ll	ll	ll	ll	lm	lm	lm	lm	lm	ll	ll	ll	lm	ll	ll	ll	lm	ll	lm	ll	ll	lm	ll	lm	lm	ll	ll	lm	ll	lm
98	234	2758	<hkxhk>		3	56.997	0.256	RACA11	GCAGTGAACTTCAACGTATTGTCAGTGACAAACCTACTGTATGCGATGGAA	43	C	T	kk	hk	hh	hk	hk	hh	hk	kk	hk	kk	kk	hh	hh	hh	hh	hh	hk	hk	kk	hk	kk	hk	kk	kk	hh	hh	hk	hk	hh	hk	hk	hk	kk	kk	hh	hk	hh
99	230	2725	<lmxll>		3	57.064	0.067	RACA11	CTCTGTGTTTGATGACATTTGTGGTGTTAAAAGACAATGCTACAACTCCAG	14	A	G	--	ll	--	ll	lm	ll	lm	lm	lm	lm	lm	ll	ll	ll	ll	ll	lm	lm	lm	ll	lm	lm	lm	lm	ll	ll	lm	ll	--	lm	ll	ll	lm	lm	ll	lm	ll
100	229	2704	<hkxhk>		3	57.944	0.88	RACA11	GATCGTTTTTTTTGGCAACTCCAACAATAACTGCTCCCTCTCCACTTGTGG	5	T	C	kk	hk	--	hk	hk	hh	hk	kk	hk	kk	kk	hh	hh	hh	hh	hh	hk	hk	kk	hk	kk	hk	kk	kk	hh	hh	hk	hk	--	hk	hk	hk	kk	kk	hh	hk	hh
101	3511	42881	<hkxhk>		3	58.596	0.652	RACA13	GCTGGAGAACTGGAACGAGGGGATGGATGGAGACGGTCCTGATGGTGATGT	32	A	T	kk	hh	hk	hh	kk	hk	kk	hk	kk	hk	hk	hk	hk	hk	hh	hk	hk	kk	hk	hh	kk	kk	hk	hh	kk	hk	hk	kk	--	kk	hh	hh	hk	kk	hk	kk	hh
102	250	2927	<lmxll>		3	58.763	0.167	RACA11	CGACTTGTAATGGGACTAGGAATGTTTGCTGTTTTCAGAGAGATGCCATGT	19	G	A	ll	lm	lm	lm	ll	lm	ll	ll	ll	ll	ll	lm	lm	lm	lm	lm	ll	ll	ll	lm	ll	ll	ll	ll	lm	lm	ll	ll	lm	ll	lm	lm	ll	ll	lm	ll	lm
103	192	2304	<lmxll>		3	59.762	0.999	RACA11	CCTCTATCTCATCTTTCATCTTTTAAGTGGGAGAAATGCATAATTGATCAC	40	T	C	ll	ll	--	ll	lm	ll	lm	lm	lm	lm	lm	ll	ll	ll	ll	ll	lm	lm	lm	ll	lm	lm	lm	lm	--	ll	lm	lm	--	lm	ll	ll	lm	lm	ll	lm	ll
104	194	2334	<lmxll>		3	60.045	0.283	RACA11	ATTGAGTGTCAATTATGGTCAGCTGCAAAATTCAACGTATTTAACTACTGT	3	G	C	ll	ll	ll	ll	lm	ll	lm	lm	lm	lm	lm	ll	ll	ll	--	ll	lm	lm	lm	ll	lm	lm	lm	lm	ll	ll	lm	lm	ll	lm	ll	ll	lm	lm	ll	lm	ll
105	4775	59295	<lmxll>		3	61.205	1.16	RACA12	ACCAGGGTTTTTTGTTTTTTTGGCTCTGCTTTTTTATTTTCCCTGTATACT	14	T	G	ll	lm	lm	lm	ll	lm	ll	ll	ll	ll	ll	lm	lm	lm	lm	lm	ll	ll	ll	lm	ll	ll	ll	ll	ll	lm	ll	ll	lm	ll	lm	lm	ll	ll	lm	ll	lm
106	4793	59662	<nnxnp>		3	61.879	0.674	RACA12	GAGAAAAAAAAGCGTTTTAAGACTGTTTGTCCTCATTTTTATCAGCACCTG	23	C	T	np	np	nn	np	nn	nn	nn	np	nn	np	np	nn	nn	nn	np	nn	np	nn	np	np	nn	nn	np	np	nn	nn	np	nn	np	nn	np	np	np	nn	nn	nn	np
107	275	3147	<lmxll>		3	62.047	0.168	RACA11	TTACAAATGAAAGGATCAAAAATATGTATGCGTAAAAAAAGTAAAATACAT	47	A	C	ll	lm	lm	lm	ll	lm	ll	ll	ll	ll	ll	lm	lm	lm	lm	lm	ll	ll	ll	lm	ll	ll	ll	ll	ll	lm	ll	ll	lm	ll	lm	lm	ll	ll	lm	ll	lm
108	271	3118	<lmxll>		3	62.928	0.881	RACA11	TTTTGCTTTTANAAGAAAGGTCACAAAAGACATTATAGCAGCACTACCCAA	34	A	T	ll	lm	lm	--	ll	lm	ll	ll	ll	ll	ll	lm	lm	lm	lm	lm	ll	ll	ll	lm	ll	ll	ll	ll	ll	ll	ll	ll	--	ll	lm	lm	ll	ll	lm	ll	lm
109	3523	42949	<lmxll>		3	63.905	0.977	RACA13	TTGTGGTTTTAACTAACAAAAAAACAAAGCTAAAGGCTTTTTTATTGTTGA	25	A	G	ll	lm	lm	lm	ll	lm	ll	ll	ll	ll	ll	lm	lm	lm	lm	lm	ll	ll	ll	lm	ll	ll	ll	lm	ll	lm	ll	ll	lm	ll	lm	lm	ll	ll	lm	ll	lm
110	3281	39836	<nnxnp>		3	68.147	4.242	RACA16	AGACTGAAATGGTTAGAGGAAGGTAAACGTTGCTCAGCTTATTTCTTCCAG	24	G	A	np	np	--	np	nn	nn	nn	np	nn	np	np	nn	nn	--	np	nn	np	nn	np	np	nn	nn	np	np	nn	nn	np	nn	np	nn	np	np	np	nn	nn	nn	np
111	3501	42730	<lmxll>	3501	3	68.213	0.066	RACA13	TTAATCCCATGGTTTTGTTTTGAAGTTTGGTCCTGTTGAAGGCAGTCTGAA	41	G	A	ll	lm	lm	lm	ll	lm	ll	ll	ll	ll	lm	lm	lm	lm	lm	lm	ll	ll	ll	lm	ll	lm	ll	lm	ll	lm	ll	ll	lm	ll	lm	ll	ll	ll	lm	ll	lm
112	5326	67922	<lmxll>	3501	3	68.213	0	sc00272	TAAGTCACTGGGTTTTGTTTTCAAAGTATGGTCTGAAACAGAAATCTCTGG	27	A	G	ll	lm	lm	lm	ll	lm	ll	ll	ll	ll	lm	lm	lm	lm	lm	lm	ll	ll	ll	lm	ll	lm	ll	lm	ll	lm	ll	ll	lm	ll	lm	ll	ll	ll	lm	ll	lm
113	3500	42725	<lmxll>		3	68.368	0.155	RACA13	AAAGCTCAGCAGAGAAGGATATGACTTTTCCTTAATTAGGCTTTCACATCT	13	G	C	ll	lm	lm	lm	ll	lm	ll	ll	ll	ll	lm	lm	lm	lm	lm	lm	ll	ll	ll	lm	ll	lm	ll	lm	ll	lm	ll	ll	lm	ll	lm	ll	ll	ll	lm	ll	lm
114	3532	43147	<lmxll>		3	68.453	0.085	RACA13	TGCGTAATTGCTTAATGTGCGGTTAGCAGGGTTCTCCAGAGCTATGACATC	46	A	T	ll	lm	--	lm	ll	lm	ll	ll	ll	ll	lm	lm	lm	lm	lm	lm	ll	ll	ll	lm	ll	lm	ll	lm	ll	lm	ll	ll	lm	ll	lm	ll	ll	ll	lm	ll	lm
115	5249	66233	<lmxll>		3	68.478	0.025	sc00219	NAATTCCTAAACACACTCCTTACCCGTGGACAGCCTTCCAGAAGAGTTGAN	30	C	A	ll	lm	lm	lm	ll	lm	ll	ll	ll	ll	lm	lm	lm	lm	lm	lm	ll	ll	ll	lm	ll	lm	ll	lm	ll	lm	ll	ll	lm	ll	--	ll	ll	ll	lm	ll	lm
116	3490	42566	<lmxll>		3	68.557	0.079	RACA13	CAAAACTGTGACTTTAAGGTGGCACAAAAATCCCTCCATAAATACAAGGGC	22	C	T	ll	lm	--	lm	ll	lm	ll	ll	ll	ll	lm	lm	lm	lm	lm	lm	ll	ll	ll	lm	ll	lm	ll	lm	ll	lm	--	ll	lm	ll	lm	ll	ll	ll	lm	ll	lm
117	5345	68306	<lmxll>		3	68.591	0.034	sc00282	CCAAGCCATGTTGTGAATCGCTAACAATCAGAACATTCACAAATCTGCCTT	23	A	T	ll	lm	lm	lm	ll	lm	ll	ll	ll	ll	lm	lm	lm	lm	lm	lm	ll	ll	ll	lm	ll	lm	ll	lm	ll	lm	ll	ll	lm	ll	lm	ll	--	ll	lm	ll	lm
118	3494	42611	<lmxll>		3	69.093	0.502	RACA13	CTTAATGTTGTCGTTACACCAAACAAATCACAAAGTGGATGAGTTTGTGTN	39	T	C	ll	lm	lm	lm	ll	lm	ll	ll	ll	ll	lm	lm	lm	lm	lm	lm	ll	ll	ll	lm	ll	lm	ll	lm	ll	lm	ll	ll	lm	ll	lm	ll	ll	ll	lm	ll	lm
119	5298	67315	<lmxll>		3	69.397	0.304	sc00252	CCCATCATCACATTTGTGCTTAGTTTAAAAAAGTTAGGTGGACGAGAAAAC	46	A	G	ll	lm	lm	lm	ll	lm	ll	ll	ll	--	lm	lm	lm	lm	lm	lm	ll	ll	ll	lm	ll	lm	ll	lm	ll	lm	ll	ll	lm	ll	lm	ll	ll	ll	lm	ll	lm
120	4789	59523	<hkxhk>		3	69.698	0.301	RACA12	CTCCTTTTTGGAAAAACACATGTTCTGAGACTGTTTATGCGAACAACGAGA	46	C	A	hh	hk	--	kk	hh	hk	hh	hk	hh	hk	kk	--	kk	hk	kk	hk	hk	hh	hh	kk	hh	kk	hk	kk	hh	hk	hk	hh	--	hh	kk	hh	hk	hh	hk	hh	kk
121	5248	66229	<hkxhk>	5248	3	69.856	0.158	sc00219	TCACACAGTAAAAAAGATCAGTCAGAGAAGAGATCAAAACTCCAAAGAAAC	15	G	C	kk	hk	hk	hh	kk	hk	kk	hk	kk	hk	hh	hk	hh	hk	hh	hk	hk	kk	kk	hh	kk	hh	hk	hh	kk	hk	hk	kk	hh	kk	hh	kk	hk	kk	hk	kk	hh
122	5347	68310	<hkxhk>	5248	3	69.856	0	sc00282	AGTCACACAGAGTGTGACTAGAGCAAAAGATTAAGCCCTTCTTTGTCTCAA	16	A	T	kk	hk	hk	hh	kk	hk	kk	hk	kk	hk	hh	hk	hh	hk	hh	hk	hk	kk	kk	hh	kk	hh	hk	hh	kk	hk	hk	kk	hh	kk	hh	kk	hk	kk	hk	kk	hh
123	5247	66225	<lmxll>		3	70.262	0.406	sc00219	CCTGGAGAGAAGAATGGATGACATGGATCAACAGGCGCGGATGAATAATGC	24	G	T	ll	lm	lm	lm	ll	lm	ll	ll	ll	ll	lm	lm	lm	lm	lm	lm	ll	ll	ll	lm	ll	lm	ll	lm	ll	lm	ll	ll	lm	ll	lm	ll	ll	ll	lm	ll	lm
124	4795	59667	<nnxnp>		3	73.303	3.041	RACA12	GCAGCTTCACAAAGAGGGAGGAGCATCACCATCATTCATAAAATTAACCTA	30	G	A	np	np	nn	np	nn	nn	--	np	nn	np	np	--	nn	nn	np	nn	np	nn	np	np	nn	nn	np	np	nn	nn	np	nn	np	nn	np	np	np	nn	nn	--	np
125	3507	42864	<nnxnp>	3507	3	77.526	4.223	RACA13	TATGCCTTTATGACAGCCTGAATGCCATTGATGTGGACAAAGTTGTGGAAT	20	G	A	nn	np	nn	np	nn	nn	nn	np	nn	np	np	nn	nn	nn	np	nn	np	nn	np	np	nn	nn	np	np	nn	nn	np	nn	np	nn	np	np	np	nn	nn	nn	np
126	3508	42870	<nnxnp>	3507	3	77.526	0	RACA13	CATTTCTCTTGAAAGCTTTCTCCTTTATCTTGTCTTTCCATTGCTGTTTTT	30	C	T	nn	np	nn	np	nn	nn	nn	np	nn	np	np	nn	nn	nn	np	nn	np	nn	np	np	nn	nn	np	np	nn	nn	np	nn	np	nn	np	np	np	nn	nn	nn	np
127	3518	42931	<nnxnp>		3	77.551	0.025	RACA13	GTGACTTTAACAGGACCACAAGACTCGATTCAGTAAGCCCAAATTTAGATT	19	C	A	nn	np	--	np	nn	nn	nn	np	nn	np	np	nn	nn	nn	np	nn	np	nn	np	np	nn	nn	np	np	nn	nn	np	nn	--	nn	np	np	np	nn	nn	nn	np
128	3517	42930	<nnxnp>		3	77.589	0.038	RACA13	TTGTTTTCATTCTATAATATAAACCACAATACATTGTGCTTACTATTCACC	42	A	C	nn	np	--	np	nn	nn	nn	np	nn	np	np	nn	nn	nn	np	nn	np	nn	np	np	nn	nn	np	np	nn	nn	np	nn	--	nn	np	np	np	nn	nn	nn	np
1	5470	70672	<lmxll>		4	0		sc00638	NAATTCCTATATTCCAGCAAAGCAATATAAGGATCACTTTGGCTCTCTTGT	16	G	A	lm	ll	ll	lm	ll	lm	lm	lm	lm	ll	lm	ll	lm	ll	ll	lm	ll	ll	ll	ll	lm	lm	ll	lm	ll	lm	lm	ll	--	lm	ll	ll	ll	ll	ll	lm	ll
2	1297	15360	<lmxll>		4	0.703	0.703	RACA32	TTGCAAACACGATCTTTGGGCAGGCTTTGAGCAGGACTTGCAGCACGGTGG	9	C	G	lm	ll	--	lm	ll	lm	lm	lm	lm	ll	lm	ll	lm	ll	ll	lm	ll	ll	ll	ll	lm	lm	ll	lm	ll	lm	lm	ll	--	lm	ll	ll	ll	ll	ll	lm	ll
3	1288	15181	<lmxll>		4	0.851	0.148	RACA32	AAACAGGAAGAACATCATGTCATTATATGATTTGTTTTTAATCAACTCAAT	31	T	C	lm	--	--	lm	ll	lm	lm	lm	lm	ll	lm	ll	lm	ll	ll	lm	ll	ll	ll	ll	lm	lm	ll	lm	ll	lm	lm	ll	lm	lm	ll	ll	ll	ll	ll	lm	ll
4	1295	15323	<lmxll>		4	1.006	0.155	RACA32	NAATTCAGGAAGGAATTTTAATCCAGTTTCACAAACTATTTCTATTTAGTT	11	G	A	lm	--	lm	lm	ll	lm	lm	lm	lm	ll	lm	ll	lm	ll	ll	lm	ll	ll	ll	ll	lm	lm	ll	lm	ll	lm	lm	ll	lm	lm	ll	ll	ll	ll	ll	lm	ll
5	1293	15265	<lmxll>		4	1.162	0.156	RACA32	TTAAACCCTGATGACCACTTTGGGTCCAAAATGACTCTAATGTAATTGAAA	18	T	A	lm	ll	lm	lm	ll	lm	lm	lm	lm	ll	lm	ll	lm	ll	ll	lm	ll	ll	ll	ll	lm	lm	ll	lm	ll	lm	lm	ll	lm	lm	ll	ll	ll	ll	ll	lm	ll
6	1312	15564	<nnxnp>		4	3.229	2.067	RACA32	NAATTCCCTGTTAGCAAACAGTGGATTTTAATGTTTGGCTCCACCTCTCTA	9	A	G	--	nn	--	nn	nn	np	nn	np	np	nn	np	np	nn	np	np	nn	np	np	np	np	np	nn	nn	np	np	--	np	nn	np	--	nn	nn	nn	np	nn	nn	nn
7	1304	15516	<lmxll>		4	4.138	0.909	RACA32	GTGGTCTTCACAACAAGTCAATAACCTCATCCTGTTCTTACGCAAGGAACT	43	A	G	lm	ll	--	lm	ll	lm	lm	lm	lm	ll	lm	ll	lm	ll	ll	lm	ll	ll	ll	ll	lm	lm	ll	lm	ll	lm	lm	ll	lm	lm	ll	ll	ll	ll	ll	lm	ll
8	1301	15501	<lmxll>		4	4.274	0.136	RACA32	CTGCGTTTGTCAGTTTCCTTTACCTCCATTTATATGTGGAAAATCCAGCCT	7	T	A	lm	ll	lm	lm	ll	lm	lm	lm	lm	ll	lm	ll	lm	ll	ll	lm	ll	ll	ll	ll	lm	lm	ll	lm	ll	lm	lm	ll	lm	lm	ll	ll	ll	ll	ll	lm	ll
9	1287	15178	<lmxll>		4	5.07	0.796	RACA32	NAATTCTTTCATTTTTGTTGGAAAAAACATTCTAAAACAGTAATCATTTTT	27	C	T	--	lm	--	ll	lm	ll	ll	ll	ll	lm	ll	lm	ll	lm	lm	--	lm	lm	lm	lm	ll	ll	lm	ll	lm	--	ll	lm	ll	ll	lm	lm	lm	lm	lm	ll	lm
10	1294	15266	<lmxll>	1294	4	5.402	0.332	RACA32	ACAGACTCTGCAGGCTGTATACTTAATCTTGCATGCTAACAAACACCTCAA	13	G	A	ll	lm	ll	ll	lm	ll	ll	ll	ll	lm	ll	lm	ll	lm	lm	ll	lm	lm	lm	lm	ll	ll	lm	ll	lm	ll	ll	lm	ll	ll	lm	lm	lm	lm	lm	ll	lm
11	1298	15394	<lmxll>	1294	4	5.402	0	RACA32	GCCTGATCCATACATGCCATTTTTTTGTGAGGCTTGCAAAACGAGGCTGGG	11	A	G	ll	lm	ll	ll	lm	ll	ll	ll	ll	lm	ll	lm	ll	lm	lm	ll	lm	lm	lm	lm	ll	ll	lm	ll	lm	ll	ll	lm	ll	ll	lm	lm	lm	lm	lm	ll	lm
12	3089	37821	<lmxll>	1294	4	5.402	0	RACA36	GAGTCCTGTTCTACTCAACACACACTTTTCGCCAATTATGTGCGTGAAGAT	38	T	A	ll	lm	ll	ll	lm	ll	ll	ll	ll	lm	ll	lm	ll	lm	lm	ll	lm	lm	lm	lm	ll	ll	lm	ll	lm	ll	ll	lm	ll	ll	lm	lm	lm	lm	lm	ll	lm
13	1316	15582	<nnxnp>		4	5.455	0.053	RACA32	GGGGAGCTCTCACTGAAGGTCTTGCTTTTATTGGATTTTATAAATCTATTT	23	T	G	nn	nn	nn	nn	nn	np	nn	np	np	np	np	np	nn	np	np	nn	np	np	np	np	np	nn	nn	np	np	np	np	nn	--	nn	nn	nn	nn	np	nn	nn	nn
14	1283	15137	<lmxll>		4	5.922	0.467	RACA32	AAAGACCGGCTCACTCACTGGGTTCTTCAGAAACTTCTCTTTAAAACAGTT	4	A	G	ll	lm	ll	ll	lm	ll	ll	ll	ll	lm	ll	lm	ll	lm	lm	ll	lm	lm	lm	lm	ll	ll	lm	ll	lm	ll	ll	lm	ll	ll	lm	lm	lm	lm	lm	ll	lm
15	1282	15132	<nnxnp>		4	6.243	0.321	RACA32	GAATTCCTGGAGCCAGTGCTGTATCTCATTTCATTGCCTTTAAGATCAATA	8	G	T	np	nn	--	nn	nn	np	nn	np	np	np	np	np	nn	np	--	nn	np	np	np	np	np	nn	nn	np	np	np	np	nn	--	nn	nn	nn	nn	np	nn	nn	nn
16	5161	64851	<hkxhk>		4	6.279	0.036	sc00177	TTTTGGTCCAGAATTTCCAAATTTAGCTTTTGTCGATTCTTGGAGTTGGCC	47	G	T	hk	hk	--	kk	hk	hk	kk	hk	hk	hh	hk	--	kk	hh	hh	kk	hh	hh	hh	--	hk	kk	hk	hk	hh	hk	hk	hk	--	kk	hk	hk	hk	hh	hk	kk	hk
17	5158	64822	<nnxnp>		4	6.454	0.175	sc00177	GCATTAATCAAACAACGCCCCGAGGTCTCTAAAGTGAACGGAGGAGCTCAG	20	C	T	np	nn	nn	nn	nn	np	nn	np	np	np	np	np	nn	np	np	nn	np	np	np	np	np	nn	nn	np	np	np	np	nn	np	nn	nn	nn	nn	np	nn	nn	nn
18	3890	47766	<efxeg>		4	7.267	0.813	RACA35	TGTTTGTTTGTTTTTCAGTTTTCTTGGAGTCTTTTTTATTTGCATTTTTAC	22	C	T	eg	ef	--	ee	ef	eg	ee	eg	eg	fg	eg	fg	ee	--	fg	ee	fg	fg	fg	fg	eg	ee	ef	eg	fg	--	eg	ef	ee	ee	ef	ef	ef	fg	ef	ee	ef
19	5070	63659	<lmxll>		4	7.686	0.419	sc00127	AACCACTATGCGTCCTGATCCCGAACCACGGGCAGAACCAGGGATGTTCTG	42	G	C	ll	lm	ll	ll	lm	ll	ll	ll	ll	lm	ll	lm	ll	lm	lm	ll	lm	lm	lm	lm	ll	ll	lm	ll	lm	ll	ll	lm	--	ll	lm	lm	lm	lm	lm	ll	lm
20	3889	47755	<hkxhk>		4	7.831	0.145	RACA35	GTCCAAGCATTCAAGCAAAAAAGGGGAGGGGCTTCCTCTGTGAAAATCTGA	7	C	T	hk	hk	--	kk	hk	hk	kk	hk	hk	hk	hk	hh	kk	hh	hh	kk	hh	hh	hh	hh	hk	kk	hk	hk	hh	hk	--	hk	hk	--	hk	hk	hk	hh	hk	kk	hk
21	1302	15505	<nnxnp>		4	8.008	0.177	RACA32	NAATTCAGAGCTTCACTGTCTGTCTGAAGTTGTTTTGAACTCATCATTCAT	14	A	T	--	nn	nn	nn	nn	np	nn	np	np	np	np	np	nn	np	np	nn	np	np	np	np	np	nn	nn	np	np	np	np	nn	np	nn	nn	nn	nn	np	nn	nn	nn
22	5178	65134	<lmxll>		4	8.03	0.022	sc00191	TTGGTCCTGATCAAGGTGGAGGGGTTGCAGTCTGACTGCTTAAAGGTGTGT	31	C	T	ll	lm	ll	ll	lm	ll	ll	ll	ll	lm	ll	lm	ll	lm	lm	ll	lm	lm	lm	lm	ll	ll	lm	ll	lm	ll	ll	lm	--	ll	lm	lm	lm	lm	lm	ll	lm
23	5177	65132	<hkxhk>		4	8.564	0.534	sc00191	TCAAGTCATCCCCTCAAAAAAGGAGCTTCCGTCCTCCAAGAACATCACTCT	30	G	A	hk	hk	kk	kk	hk	hk	kk	hk	hk	hh	hk	hh	kk	hh	hh	kk	hh	hh	hh	hh	hk	kk	hk	hk	hh	hk	hk	hk	hk	kk	hk	hk	hk	hh	hk	kk	hk
24	5180	65145	<hkxhk>		4	8.599	0.035	sc00191	GTTGCCTTCTTTGGAAGAATTTGAATGGAATACTTAATGGGAAAAAATCCT	12	G	T	hk	hk	hh	hh	hk	hk	--	hk	hk	kk	hk	kk	hh	kk	kk	hh	kk	kk	kk	kk	hk	hh	hk	hk	kk	hk	hk	hk	hk	hh	hk	hk	hk	kk	hk	hh	hk
25	5181	65159	<hkxhk>		4	8.61	0.011	sc00191	TTGATTTCATCACATGTAAGCTTAATATCTGACTTTACATCCTCAAAATTC	3	A	G	hk	hk	hh	hh	hk	hk	hh	hk	hk	kk	hk	kk	hh	--	kk	hh	kk	kk	kk	kk	hk	hh	hk	hk	kk	hk	hk	hk	--	hh	hk	hk	hk	kk	hk	hh	hk
26	5165	64894	<hkxhk>		4	8.617	0.007	sc00177	CTTACAAACGGGCATCCCAGAGGTTTCCTCAGTGGACTAACAGGGTAACCG	28	T	A	hk	hk	kk	kk	hk	hk	kk	hk	hk	hh	hk	hh	kk	hh	hh	kk	hh	hh	hh	hh	hk	kk	hk	hk	hh	hk	hk	hk	hk	kk	hk	hk	hk	hh	hk	kk	hk
27	5079	63744	<lmxll>		4	8.694	0.077	sc00127	CCTCGTGCACGTGGGTCAGATGAGCTTCTCCTGTTCTGTTGTCAGTTACCT	9	C	T	ll	lm	--	ll	lm	ll	ll	ll	ll	lm	ll	lm	ll	lm	lm	ll	lm	lm	lm	lm	ll	ll	lm	ll	lm	ll	ll	lm	--	--	lm	lm	lm	lm	lm	ll	lm
28	5082	63794	<lmxll>		4	8.698	0.004	sc00127	TCAAAACACAAGCTGATCGTCAGAGCAAATCATCCTGACCTTTGCCAGCGT	17	C	T	ll	lm	--	ll	lm	ll	ll	ll	--	lm	ll	lm	ll	lm	lm	--	lm	lm	lm	lm	ll	ll	lm	--	lm	ll	ll	lm	--	ll	lm	lm	lm	lm	lm	ll	lm
29	5072	63679	<lmxll>	5072	4	8.787	0.089	sc00127	CTTTTTAAATGATGGTTCTGAGCCTGGAGAGACATTTTTGAGGTTTCCTTC	29	A	G	ll	lm	--	ll	lm	ll	ll	ll	ll	lm	ll	lm	ll	lm	lm	ll	lm	lm	lm	lm	ll	ll	lm	ll	lm	ll	ll	lm	ll	ll	lm	lm	lm	lm	lm	ll	lm
30	5073	63681	<lmxll>	5072	4	8.787	0	sc00127	TTAGTCATATGGTTTTGTTTACAAGCTTTCGCTTGAAACAAAAATGTCAAT	19	T	G	ll	lm	--	ll	lm	ll	ll	ll	ll	lm	ll	lm	ll	lm	lm	ll	lm	lm	lm	lm	ll	ll	lm	ll	lm	ll	ll	lm	ll	ll	lm	lm	lm	lm	lm	ll	lm
31	5080	63760	<lmxll>	5072	4	8.787	0	sc00127	NAATTCCTGCTATCAGCTCCCCAGATGAATCCACTGTCTTTTTCTCTGAAA	11	A	G	ll	lm	--	ll	lm	ll	ll	ll	ll	lm	ll	lm	ll	lm	lm	ll	lm	lm	lm	lm	ll	ll	lm	ll	lm	ll	ll	lm	ll	ll	lm	lm	lm	lm	lm	ll	lm
32	3893	47793	<lmxll>		4	8.795	0.008	RACA35	TTACCTGGGATCTGGGCGGGACGCAAACGATCATAGAAATGATATAAATCC	24	A	T	ll	lm	ll	ll	lm	ll	ll	ll	ll	--	ll	lm	ll	lm	lm	ll	lm	lm	lm	lm	ll	ll	lm	ll	lm	ll	ll	lm	ll	ll	lm	lm	lm	lm	lm	ll	lm
33	5069	63656	<lmxll>	5069	4	8.829	0.034	sc00127	TGTACAATTCGTAGCTGACTAAATCCTTTTTTGCCCCACTGTATATACAAT	12	A	G	ll	lm	ll	ll	lm	ll	ll	ll	ll	lm	ll	lm	ll	lm	lm	ll	lm	lm	lm	lm	ll	ll	lm	ll	lm	ll	ll	lm	ll	ll	lm	lm	lm	lm	lm	ll	lm
34	5182	65160	<lmxll>	5069	4	8.829	0	sc00191	GTAGTTTATTTATTTACTGAACTCCAAGAAAGCTGCAGATGAATTGGGGGG	46	G	A	ll	lm	ll	ll	lm	ll	ll	ll	ll	lm	ll	lm	ll	lm	lm	ll	lm	lm	lm	lm	ll	ll	lm	ll	lm	ll	ll	lm	ll	ll	lm	lm	lm	lm	lm	ll	lm
35	5160	64844	<hkxhk>		4	8.846	0.017	sc00177	GCTGAAGTTATGAGGTAGTTGGTGTTAAACTAACATCGATGTAAATTCCAG	21	G	A	hk	hk	hh	hh	hk	hk	hh	hk	hk	kk	hk	kk	hh	kk	kk	hh	kk	kk	kk	kk	hk	hh	hk	hk	kk	hk	hk	hk	hk	hh	hk	hk	hk	kk	hk	hh	hk
36	1308	15549	<lmxll>		4	8.882	0.036	RACA32	CTCAACAACAGGGAGGGAAAAAGACACATTTCTGCTGAAGTTCTGCCGCTC	38	A	G	lm	ll	lm	lm	ll	lm	lm	lm	lm	ll	lm	ll	lm	ll	ll	lm	ll	ll	ll	ll	lm	lm	ll	lm	ll	lm	lm	ll	lm	lm	ll	ll	ll	ll	ll	lm	ll
37	5163	64876	<lmxll>		4	9.54	0.658	sc00177	TTAGTCACGTAGTTTTGTTTTAAAGTCCGCTTGACGTCTGTTAATACAGAC	10	A	G	ll	lm	--	ll	lm	ll	ll	ll	ll	lm	ll	lm	ll	lm	lm	ll	lm	lm	lm	lm	ll	ll	lm	ll	lm	ll	ll	lm	ll	ll	lm	lm	lm	lm	lm	ll	lm
38	5074	63690	<hkxhk>		4	11.095	1.555	sc00127	TCTAAAATCAGCCAAACATTCATTTTTACTGGCAGATTTGCCCACCCTTTT	4	A	C	hk	--	hk	hk	kk	hh	hk	hh	hh	hk	hh	hk	hk	hk	hk	hk	hk	hk	hk	hk	hh	hk	kk	hh	hk	hh	hh	kk	hh	hk	--	kk	kk	hk	--	hk	kk
39	1313	15569	<efxeg>		4	11.263	0.168	RACA32	AAGTGACCCAGAGGACCAATTATAATCCTTGAATTTTTCAACAAAAGGAAA	6	C	T	fg	eg	--	fg	eg	ef	fg	ef	ef	ee	ef	ee	fg	ee	ee	--	ee	ee	ee	ee	ef	fg	eg	ef	ee	ef	ef	eg	ef	fg	eg	eg	eg	ee	eg	fg	eg
40	5071	63675	<lmxll>		4	12.05	0.787	sc00127	AAAATGGTCAGGTGGCTGTAATGTAAAGGTAGAGTGGTTGACTTCTGATCG	42	T	C	ll	lm	ll	ll	lm	ll	ll	ll	ll	lm	ll	lm	ll	lm	lm	ll	lm	lm	lm	lm	ll	ll	lm	ll	lm	ll	ll	lm	ll	ll	lm	lm	lm	lm	lm	ll	lm
41	5075	63700	<lmxll>		4	12.055	0.005	sc00127	GACTTTGTCAATAAAAAAAGATAAAAACCTTTTACAATCATCATTGAGTGG	32	T	C	ll	lm	ll	ll	lm	ll	ll	ll	ll	lm	ll	lm	ll	lm	lm	ll	lm	lm	lm	lm	ll	ll	lm	ll	lm	ll	ll	lm	ll	ll	lm	lm	lm	lm	lm	ll	lm
42	5068	63644	<lmxll>		4	12.148	0.093	sc00127	GACCAACCACTACATCTCGCTCTATTCCACAACCCGACTGGTACATTCAAA	41	T	A	ll	lm	--	ll	lm	ll	ll	ll	ll	lm	ll	lm	ll	lm	lm	ll	lm	lm	lm	lm	ll	ll	--	ll	lm	ll	ll	lm	--	ll	lm	lm	lm	lm	lm	ll	lm
43	1303	15514	<hkxhk>		4	12.529	0.381	RACA32	CTGGCTTCTGGTTTCTTGTCAGCATAGTAAGAAGCCATGCCAGAGACCATT	26	G	A	hk	hh	hk	hk	hh	kk	hk	kk	kk	hk	kk	hk	hk	hk	hk	hk	hk	hk	hk	hk	kk	hk	hh	kk	hk	kk	kk	hh	--	hk	hh	hh	hh	hk	hh	hk	hh
44	1318	15605	<nnxnp>		4	13.093	0.564	RACA32	AGTTTGCTGATTGTTCAACAAAAGCAATGATATAATTCACATATATTCTCT	11	A	T	np	np	--	np	np	nn	np	nn	nn	nn	nn	nn	np	nn	nn	--	nn	nn	nn	nn	nn	np	np	nn	nn	nn	nn	np	--	np	np	np	np	nn	np	np	np
45	1310	15557	<efxeg>		4	13.093	0	RACA32	CGTTGACCTCAGAGGTGTTTGCTCCGTCACACATTTTTAGTTTTTGTCCTT	13	G	A	eg	--	eg	eg	fg	ee	eg	ee	ee	ef	ee	ef	eg	ef	ef	eg	ef	ef	ef	ef	ee	eg	fg	ee	ef	ee	ee	fg	ee	eg	--	fg	fg	ef	fg	eg	fg
46	1320	15630	<nnxnp>		4	13.213	0.12	RACA32	NAATTCTCCAAGAGACCTCATGCCATACTGATGCTACAGCGGAGCTGAAGC	40	T	G	np	np	np	np	np	nn	np	nn	nn	nn	nn	--	np	nn	nn	np	nn	nn	nn	nn	nn	np	np	nn	nn	nn	nn	--	nn	np	np	np	np	nn	np	np	np
47	1322	15639	<nnxnp>	1322	4	13.238	0.025	RACA32	CCCTCCTGCCTATTGTCCCTCACTGATCCAAAGTAATTAAAGTTTTTTGTG	37	G	T	np	np	np	np	np	nn	np	nn	nn	nn	nn	nn	np	nn	nn	np	nn	nn	nn	nn	nn	np	np	nn	nn	nn	nn	np	nn	np	np	np	np	nn	np	np	np
48	1323	15657	<nnxnp>	1322	4	13.238	0	RACA32	AAAATTTCAAGAGCTTGTGAGGGATTGGCCCATTCAAACACTGACTTCCAT	19	G	A	np	np	np	np	np	nn	np	nn	nn	nn	nn	nn	np	nn	nn	np	nn	nn	nn	nn	nn	np	np	nn	nn	nn	nn	np	nn	np	np	np	np	nn	np	np	np
49	5225	65847	<nnxnp>		4	13.379	0.141	sc00209	TGTTACTAGTCAACCGTTTACGCAACTCCTAGTGGATTAAAAAGTGTAGAG	38	A	C	np	np	--	np	np	nn	np	nn	nn	nn	nn	nn	np	nn	nn	np	nn	nn	nn	nn	nn	np	--	nn	nn	nn	nn	np	nn	np	np	np	np	nn	np	np	np
50	5232	65882	<nnxnp>		4	13.451	0.072	sc00209	CCTAAATGATTGTAATGCCAGCAGTGGTGATATATACATAACACATTTTAT	37	A	G	np	np	np	np	np	nn	np	nn	nn	nn	nn	nn	np	nn	nn	np	nn	nn	nn	nn	nn	np	np	nn	nn	nn	nn	np	nn	np	np	np	np	nn	np	np	np
51	5078	63733	<lmxll>		4	14.111	0.66	sc00127	NAATTCCATAAAACCACAAAGAGAAATTATGCTAAATTGATTTTAATTGTC	17	A	T	ll	lm	--	ll	lm	ll	ll	ll	ll	lm	ll	lm	ll	lm	lm	ll	lm	lm	lm	lm	ll	ll	lm	ll	lm	ll	ll	lm	--	ll	lm	lm	lm	lm	lm	ll	lm
52	5234	65899	<nnxnp>		4	14.799	0.688	sc00209	TCAGTGTTTGAGATTTGGTTGAGTCAAAGTAAAGATCAAAAACATAACAGA	44	T	C	np	np	np	np	np	nn	np	nn	nn	nn	nn	nn	np	--	nn	np	nn	nn	nn	nn	nn	np	np	nn	nn	nn	nn	np	nn	np	np	np	np	nn	np	np	np
53	5531	71878	<hkxhk>		4	15.308	0.509	sc06042	GGGAGAAAACACATGACATTTGTTTCCTTACGTTATTTACAGTTCTTACAA	26	C	T	hk	hh	hk	hk	hh	kk	hk	--	kk	hk	kk	hk	hk	hk	hk	hk	hk	hk	hk	hk	kk	hh	hh	kk	hk	kk	kk	hh	kk	hk	hh	hh	hh	hk	hh	hk	hh
54	1319	15616	<hkxhk>		4	15.725	0.417	RACA32	GCAGACACACACATCCAACGTGTTTACTGTTAGATCCCACATGAACTACAA	19	G	A	hk	hh	--	hk	hh	kk	hk	kk	kk	hk	kk	hk	hk	hk	hk	hk	hk	hk	hk	hk	kk	hh	hh	kk	hk	kk	kk	hh	--	hk	hh	hh	hh	hk	hh	hk	hh
55	1321	15635	<hkxhk>		4	15.804	0.079	RACA32	ATTCCATAGTAATTTGTCATGGTATTTATGTGTCAAAATTAAAAAACAATT	22	T	C	hk	--	hk	hk	kk	hh	hk	hh	hh	hk	hh	hk	hk	hk	hk	hk	hk	hk	hk	hk	hh	kk	kk	hh	hk	hh	hh	kk	hh	hk	kk	kk	kk	hk	kk	hk	kk
56	5226	65852	<efxeg>		4	16.291	0.487	sc00209	TTTAAATCTTGTTCAGAAAGAGCTTTTGAATGTATTCTCTTGCTAATACAC	19	A	G	eg	--	eg	eg	--	ee	eg	ee	ee	ef	ee	ef	eg	ef	ef	eg	ef	ef	ef	ef	ee	fg	fg	ee	ef	ee	ee	fg	ee	eg	fg	fg	eg	ef	fg	eg	fg
57	1275	15056	<lmxll>		4	17.703	1.412	RACA32	ATTTGAAATAATGTATGATAGAAACTCTTTTTCTGAGTATTTCTTAATACA	19	A	T	lm	--	--	lm	ll	lm	lm	lm	lm	ll	lm	ll	lm	ll	ll	lm	ll	ll	ll	ll	lm	ll	ll	lm	ll	lm	lm	ll	lm	lm	ll	ll	lm	ll	ll	lm	ll
58	1279	15086	<lmxll>		4	18.509	0.806	RACA32	GATTTCTCTGTCTGTGAATGTTGGGAACCCTGAGGTCGGCGTGGGACACTT	35	T	C	ll	lm	ll	ll	lm	ll	ll	ll	ll	lm	ll	lm	ll	lm	lm	ll	lm	lm	lm	lm	ll	lm	lm	ll	lm	ll	ll	lm	ll	ll	lm	lm	ll	lm	lm	ll	lm
59	5227	65859	<lmxll>		4	18.53	0.021	sc00209	TTAAGCCCAAGTGCAGGTTATGTGTCAGTCTTTCTGCTCATACAAACTTGA	13	C	G	ll	lm	ll	ll	lm	ll	ll	ll	ll	lm	ll	lm	ll	lm	lm	ll	lm	lm	lm	lm	ll	lm	lm	ll	lm	ll	ll	lm	--	ll	lm	lm	ll	lm	lm	ll	lm
60	5228	65860	<lmxll>		4	18.559	0.029	sc00209	ATCCATTCAAACTGCAGTTTCAGGGTCAACCAAAGACCAGCAGTCATCGGA	4	A	T	ll	lm	ll	ll	lm	ll	ll	ll	ll	lm	--	lm	ll	lm	lm	ll	lm	lm	lm	lm	ll	lm	lm	ll	lm	ll	ll	lm	ll	ll	lm	lm	ll	lm	lm	ll	lm
61	1280	15090	<lmxll>		4	18.604	0.045	RACA32	CCATTAAAAATTCTTAATTATTGATGAGGTCCATTAAAAAACTTGTAGCAT	32	A	T	ll	--	ll	ll	lm	ll	ll	ll	ll	lm	ll	lm	ll	lm	lm	ll	lm	lm	lm	lm	ll	lm	--	ll	lm	ll	ll	lm	ll	ll	lm	lm	ll	lm	lm	ll	lm
62	1268	14967	<lmxll>		4	18.617	0.013	RACA32	CCTGAAAGTGAATCTAAACCTTCGATTCTTTGGTTGACACCAGGATTCAGA	43	G	T	ll	lm	--	ll	lm	ll	ll	ll	ll	lm	ll	lm	ll	lm	lm	ll	lm	lm	lm	lm	ll	lm	lm	ll	lm	ll	ll	lm	--	ll	lm	lm	ll	lm	lm	--	lm
63	5235	65909	<lmxll>		4	18.622	0.005	sc00209	TTTGTCTTCTATCACCTCACCCTCAAAAATGTTTGCTCAAAATCTAAATAG	8	C	T	ll	--	--	ll	lm	ll	ll	ll	ll	lm	ll	lm	ll	lm	lm	ll	lm	lm	lm	lm	ll	lm	--	ll	lm	ll	ll	lm	ll	ll	lm	lm	ll	lm	lm	ll	lm
64	1271	14986	<lmxll>		4	18.721	0.099	RACA32	TCTCAAGAGCTGTGATGATTTGGGGCTGTTTCTGGGCACAAGAAACTATAC	17	A	T	ll	lm	--	ll	lm	ll	ll	ll	ll	lm	ll	lm	ll	lm	lm	--	lm	lm	lm	lm	ll	lm	lm	ll	lm	ll	--	lm	--	ll	lm	lm	ll	lm	lm	ll	lm
65	5229	65865	<lmxll>		4	18.765	0.044	sc00209	GGGAGGAGAGAGAACTAAGCCTGGGCTCTCTGATTACATTCTTAGTCTGCT	21	T	C	ll	lm	--	ll	lm	ll	ll	ll	ll	lm	ll	lm	ll	lm	lm	ll	lm	lm	lm	lm	ll	lm	lm	ll	lm	ll	ll	lm	--	ll	lm	lm	ll	lm	lm	ll	lm
66	1269	14978	<efxeg>		4	19.054	0.289	RACA32	GAATTCCACTTCTCAGCAACTGGTGAAGGTTCACATGGTGTGGAGACGGTG	11	C	T	ee	ef	ee	ee	ef	eg	ee	eg	ee	--	eg	--	ee	ef	fg	ee	ef	fg	fg	fg	eg	ef	ef	eg	fg	eg	eg	ef	--	ee	ef	ef	ee	fg	ef	ee	ef
67	1267	14949	<hkxhk>		4	19.33	0.276	RACA32	TCCATCAAAGTCTCTGTACTCTCCACTCAAAGCAGCAGGAGGAAAACAAAA	15	G	T	hh	hk	hh	hh	hk	hk	hh	hk	hh	kk	hk	kk	hh	hk	kk	--	hk	kk	kk	kk	hk	hk	hk	hk	kk	hk	hk	hk	hk	hh	hk	hk	hh	kk	hk	hh	hk
68	1261	14896	<lmxll>	1261	4	20.529	1.199	RACA32	TGCTTTTAACAACATTTAGAACTCGCATTTAGCTAATTCAAAAATCTGCTT	41	A	G	lm	ll	lm	lm	ll	lm	lm	lm	lm	ll	lm	ll	lm	ll	ll	lm	ll	ll	ll	ll	lm	ll	ll	lm	ll	lm	lm	ll	lm	lm	ll	ll	lm	ll	ll	lm	ll
69	1270	14981	<lmxll>	1261	4	20.529	0	RACA32	GAGTGAGTTTACTGTAAATAGTGAGTGTTTAGGCTGATCTTGTAGCCTAGT	13	G	C	lm	ll	lm	lm	ll	lm	lm	lm	lm	ll	lm	ll	lm	ll	ll	lm	ll	ll	ll	ll	lm	ll	ll	lm	ll	lm	lm	ll	lm	lm	ll	ll	lm	ll	ll	lm	ll
70	1259	14885	<hkxhk>		4	20.774	0.245	RACA32	ACATAACTTACAAAGAAAAAAACTGTTTTCAGTCCCATATTTACCTACATC	37	T	C	hk	kk	--	hk	kk	hh	hk	hh	hk	hk	hh	hk	hk	kk	hk	hk	kk	hk	hk	hk	hh	kk	kk	hh	hk	hh	hh	kk	hh	hk	kk	kk	hk	hk	kk	hk	kk
71	1265	14914	<hkxhk>		4	21.141	0.367	RACA32	GCATGCAGGAATGGACCAAAGTAGCAGCTACAGTGCAAATCCGGCACAATA	5	C	G	hk	kk	hk	hk	kk	hh	hk	hh	hk	hk	hh	hk	hk	kk	hk	hk	kk	hk	hk	hk	hh	kk	kk	hh	hk	hh	hh	kk	hh	hk	kk	kk	hk	hk	kk	hk	kk
72	1262	14908	<hkxhk>		4	21.26	0.119	RACA32	TGAATCAGTGATCTTGGACATCGCAAATATTCATACTCATATTTAGAGGAA	45	G	C	hk	--	--	hk	kk	hh	hk	hh	hk	hk	hh	hk	hk	kk	hk	hk	kk	hk	hk	hk	hh	kk	--	hh	hk	hh	hh	kk	hh	hk	kk	kk	hk	hk	kk	hk	kk
73	1263	14910	<hkxhk>		4	21.305	0.045	RACA32	AATCAGTCTGGAAAGTGAAAACATCTAAGCCGCCGTATAAAGGAGATCATT	6	T	C	hk	kk	--	hk	kk	hh	hk	hh	hk	hk	hh	hk	hk	kk	hk	hk	kk	hk	hk	hk	hh	kk	kk	--	hk	hh	hh	--	hh	hk	kk	kk	hk	hk	kk	hk	kk
74	1258	14880	<nnxnp>		4	22.435	1.13	RACA32	ACAGCTTAAAAAGTTGTAAATCTACATCTTTAAAACACATTTATAAGAAAA	41	T	G	--	nn	nn	nn	nn	np	nn	np	--	np	np	np	nn	nn	np	nn	nn	np	np	np	np	nn	nn	np	np	np	np	nn	np	nn	nn	nn	nn	np	nn	nn	nn
75	1266	14933	<nnxnp>		4	23.039	0.604	RACA32	GGAAACTGCAAGGCTGGGAGAGGTGAATTATGGTATTGCAAAGGTTTGTTA	42	G	A	nn	nn	--	nn	nn	np	nn	np	nn	np	np	np	nn	nn	np	nn	nn	np	np	np	np	nn	nn	np	np	np	np	nn	--	nn	nn	nn	nn	np	nn	nn	nn
76	1264	14912	<nnxnp>		4	23.089	0.05	RACA32	TCTGCATTCTTAGAACTCTCAATGAAGCCTGCAGTTGCAAACACAAACCAA	36	G	A	nn	nn	nn	nn	nn	np	nn	np	nn	np	np	np	nn	nn	np	nn	nn	np	np	np	np	nn	nn	np	np	np	np	nn	np	nn	nn	nn	nn	np	nn	nn	nn
77	1250	14796	<nnxnp>		4	24.719	1.63	RACA32	ATCTGGTATTATTGAAAAATCAAAGTGATATCAACTTTCAAAGGACGGTGT	35	C	T	nn	nn	nn	nn	nn	np	nn	np	nn	np	np	np	nn	nn	np	nn	nn	nn	np	np	np	nn	nn	np	np	np	np	nn	np	nn	nn	nn	nn	np	nn	nn	nn
78	1252	14799	<nnxnp>		4	25.05	0.331	RACA32	GTGACCTGAAAAACTGCCCATCCATCCATCCATCCATCCATCCATCCATCC	4	A	C	nn	nn	nn	nn	nn	np	nn	np	nn	np	np	np	nn	nn	np	nn	nn	nn	np	np	np	nn	nn	np	np	np	np	nn	np	nn	nn	nn	nn	np	nn	nn	nn
79	1238	14686	<nnxnp>		4	26.816	1.766	RACA32	CTCCTGTTAAACCGGGTTTGAAAACAGCTTTTGTCTCCACACGCAGCTGAG	14	A	G	nn	nn	--	nn	nn	np	nn	np	nn	np	np	np	nn	nn	np	nn	nn	nn	np	np	np	nn	nn	np	np	np	np	nn	np	nn	nn	nn	nn	np	nn	nn	nn
80	1243	14698	<nnxnp>		4	26.82	0.004	RACA32	TTTTAAGGCCACACATGTCAAAAATTAGGACCAATTTCTCTGTCTATTTCC	29	A	G	--	nn	nn	nn	--	np	nn	np	--	np	np	np	nn	nn	np	nn	nn	nn	np	np	np	nn	nn	np	np	np	np	nn	np	nn	--	nn	nn	np	nn	nn	nn
81	1244	14717	<nnxnp>		4	26.835	0.015	RACA32	GCTGTTTCCATCAGGTTGAATTTACTTCTGTGTTTTGTTCTAGCATGCTCT	43	T	C	nn	--	nn	nn	nn	np	nn	np	nn	np	np	np	nn	nn	np	nn	nn	nn	np	np	np	nn	nn	np	np	np	np	nn	np	nn	nn	nn	nn	np	nn	nn	nn
82	1226	14514	<lmxll>		4	28.679	1.844	RACA32	TAAATAGAGTTCTGTCTTTCTTTTGATTTTATACATTTTTCACACAGCAGT	6	G	C	lm	lm	ll	ll	lm	ll	lm	lm	ll	lm	ll	lm	lm	lm	lm	ll	lm	lm	lm	lm	ll	lm	lm	ll	lm	ll	ll	lm	ll	ll	lm	lm	ll	ll	lm	ll	lm
83	1229	14575	<hkxhk>		4	29.86	1.181	RACA32	TGTTGTTTCGGTCAAGATGTAGAGCTGCTCAAGGAGGCTCAAAACCAAAGA	13	A	G	kk	kk	hk	hk	kk	hh	kk	hk	hk	hk	hh	hk	kk	kk	hk	hk	kk	kk	hk	hk	hh	kk	kk	hh	hk	hh	hh	kk	--	hk	kk	kk	hk	hh	kk	hk	kk
84	1231	14605	<nnxnp>		4	29.993	0.133	RACA32	CTGTTTCTCTAACCTGCCATACCAGGTGGAATTAAAATGAAGGATCCTCTT	14	A	T	np	np	np	np	np	nn	np	nn	np	nn	nn	nn	np	np	nn	np	np	np	nn	nn	nn	np	np	nn	nn	nn	nn	np	nn	np	np	np	np	nn	np	np	np
85	1241	14696	<nnxnp>		4	30.069	0.076	RACA32	CTGTAAATTGACTGATTTAACAGAGATGACCCACAGTGTAAATTCAGGGTG	27	A	G	np	np	--	np	np	nn	np	nn	np	nn	nn	nn	np	np	nn	np	np	np	nn	nn	nn	np	np	nn	nn	nn	nn	np	--	np	np	np	np	nn	np	np	np
86	1228	14565	<lmxll>		4	30.082	0.013	RACA32	CATCGGTATGTCAGATCACTTATGTCCTAAATGTAATGAAGACCTGGCTGG	12	A	T	lm	lm	--	ll	lm	ll	lm	lm	ll	lm	ll	lm	lm	lm	lm	--	lm	lm	lm	lm	ll	lm	lm	ll	lm	ll	ll	lm	ll	lm	lm	lm	ll	ll	lm	ll	lm
87	1242	14697	<nnxnp>		4	31.35	1.268	RACA32	TCCCGTCACTTTGAAGTATGGGAAAAGCACCACAAGAACCATTCCGAGAGC	45	A	G	np	np	--	np	np	nn	np	nn	np	nn	nn	nn	np	np	nn	np	np	np	nn	nn	nn	np	np	nn	nn	nn	nn	np	--	np	np	np	np	nn	np	np	np
88	1230	14591	<nnxnp>		4	31.557	0.207	RACA32	NNACTTAATAGATGAACATCTTTAATGCTTCCTTAAACCAAAAGCTGCTTC	16	C	A	np	np	--	np	np	nn	np	nn	np	nn	nn	nn	np	np	nn	np	np	np	nn	nn	nn	np	np	nn	nn	nn	nn	np	nn	np	np	np	np	nn	np	np	np
89	1223	14472	<lmxll>		4	32.934	1.377	RACA32	TATAAGTGAACCTTACGGTGTTTTTCGGACCATATAGCTCAATTAAAATCC	35	A	G	lm	lm	ll	ll	lm	ll	lm	lm	ll	lm	ll	lm	lm	lm	lm	ll	lm	lm	lm	ll	ll	lm	lm	ll	lm	ll	ll	lm	--	ll	lm	lm	ll	ll	lm	ll	lm
90	1227	14518	<nnxnp>		4	34.159	1.225	RACA32	GCCACATTGGTAGGAATACAAACCCATACTAAGGAGCAAACCCAGCACTCA	8	G	A	np	np	np	np	nn	nn	np	nn	np	nn	nn	nn	np	np	nn	np	np	np	nn	nn	nn	np	np	nn	nn	nn	nn	np	--	np	np	np	np	nn	np	np	np
91	1222	14451	<lmxll>		4	34.328	0.169	RACA32	GAGCCCGGGGGTCTGAGCCTGCGATCAGGACATTATCTATAGCCCAGTCAC	4	C	T	lm	lm	ll	ll	lm	ll	lm	lm	ll	lm	ll	lm	lm	lm	lm	ll	lm	lm	lm	ll	ll	lm	lm	ll	lm	ll	ll	lm	ll	ll	lm	lm	ll	ll	lm	ll	lm
92	1219	14431	<lmxll>		4	35.181	0.853	RACA32	AACCCTGTGTTTTCATTTATTATGAATGGAGTTTCAATTTAAATGTATTGT	39	T	A	lm	lm	ll	ll	ll	ll	lm	lm	ll	lm	ll	lm	lm	lm	lm	ll	lm	lm	lm	ll	ll	lm	lm	ll	lm	ll	ll	lm	--	ll	lm	lm	ll	ll	lm	ll	lm
93	1218	14429	<lmxll>		4	35.712	0.531	RACA32	GCCTGCGTTGCAGAGCAACAAATGATTTACTGTGCATCCCCGCCAAACNNN	30	T	G	lm	lm	--	ll	ll	--	lm	lm	ll	lm	ll	lm	lm	lm	lm	ll	lm	lm	lm	ll	ll	lm	lm	ll	lm	ll	ll	lm	ll	ll	lm	lm	ll	ll	lm	ll	lm
94	1215	14379	<lmxll>		4	36.733	1.021	RACA32	GCAATAGATTAAACGGCCTTAATGCATTCAAAGTTGGTAGTAAAGTCCAAA	32	G	A	lm	lm	ll	ll	ll	ll	lm	lm	ll	lm	ll	lm	lm	lm	lm	ll	lm	lm	lm	ll	ll	lm	lm	ll	lm	ll	ll	lm	--	ll	lm	lm	ll	ll	lm	ll	lm
95	1216	14408	<lmxll>		4	37.007	0.274	RACA32	GTGCTAACTCAGCTGGAACAAAGAGTAAGAAAGCTAAAAAATGATTAAAGA	35	A	G	lm	lm	ll	ll	ll	ll	lm	lm	ll	lm	ll	lm	lm	lm	lm	ll	lm	lm	lm	ll	ll	lm	lm	ll	lm	ll	ll	lm	ll	ll	lm	lm	ll	ll	lm	ll	lm
96	1173	13746	<hkxhk>		4	40.776	3.769	RACA32	TATCACTATACCATTTCCACTGCAATTTACATAATTAGAAAACAAAAGTGC	38	A	C	hk	hk	--	hk	hk	hk	hk	hk	hk	hh	hk	hk	hk	hk	hh	hk	hk	hk	hh	hk	kk	hk	hk	hh	hh	kk	hk	hh	hk	kk	hk	hk	kk	hk	kk	hk	hk
97	1184	14032	<lmxll>		4	41.871	1.095	RACA32	GAAATGTGGGTAGTCTGAATACTAGGGGTATAGGAAAAAATCAATTTGTCG	41	C	A	ll	ll	lm	lm	lm	lm	ll	ll	ll	ll	lm	ll	ll	ll	ll	lm	ll	ll	ll	lm	lm	ll	ll	lm	ll	lm	lm	ll	lm	lm	ll	ll	lm	lm	lm	lm	ll
98	1183	14031	<lmxll>		4	43.272	1.401	RACA32	TGTTGTTTTGGTCGAGGTGTAGACCAGCTCAAAGAAGCTCATTGAGATGTG	15	G	T	ll	ll	lm	lm	lm	lm	ll	ll	ll	ll	lm	ll	ll	ll	ll	lm	ll	ll	ll	lm	lm	ll	ll	lm	ll	lm	lm	ll	lm	lm	ll	ll	lm	lm	lm	lm	ll
99	1376	16378	<efxeg>		4	44.693	1.421	RACA32	GGAATGAGCAGCTCCGATCTAAGTGATCCAGAGGAGGATAGGACCAGTAGG	14	C	T	ef	ef	ee	eg	--	eg	ef	ef	fg	fg	eg	ef	ef	ef	fg	eg	ef	ef	fg	--	ee	ef	ef	fg	fg	ee	eg	fg	--	ee	ef	ef	ee	eg	ee	eg	ef
100	1377	16414	<lmxll>		4	44.749	0.056	RACA32	AGAGTTTTGCTGAAATGTAAAGGTCCTGACTCCATGCAGTTCATAGGAACA	37	A	G	lm	lm	ll	ll	ll	ll	lm	lm	lm	lm	ll	lm	lm	lm	lm	ll	lm	lm	lm	ll	ll	lm	lm	lm	lm	ll	ll	lm	ll	ll	lm	lm	ll	ll	ll	ll	lm
101	1384	16480	<lmxll>		4	44.985	0.236	RACA32	TTTCAAGAACACAATATCTTGCTTGTGTAGTTTCAACAAGCATATCTAGAA	13	A	G	lm	lm	ll	ll	ll	ll	lm	lm	lm	lm	ll	lm	lm	lm	lm	ll	lm	lm	lm	ll	ll	lm	lm	lm	lm	ll	ll	lm	ll	ll	lm	lm	ll	ll	ll	ll	lm
102	1380	16445	<lmxll>		4	45.136	0.151	RACA32	GAGCAGCTTGCTCGTGCTACAAGGCAACAATGATAAAGGGAGAGGGAAAAG	30	T	C	lm	lm	ll	ll	ll	ll	lm	lm	lm	lm	ll	lm	lm	lm	lm	--	lm	lm	lm	ll	ll	lm	lm	lm	lm	ll	ll	lm	ll	ll	lm	lm	ll	ll	ll	ll	lm
103	1168	13684	<lmxll>		4	45.766	0.63	RACA32	TTTATACAGTCAGTTGTGTTGACTGAATAGCTCAGTCTTAGATACAGACTA	24	G	A	lm	lm	ll	ll	ll	ll	lm	lm	lm	lm	ll	lm	lm	lm	lm	ll	lm	lm	lm	ll	ll	lm	lm	lm	lm	ll	ll	lm	ll	ll	lm	lm	ll	ll	ll	ll	lm
104	1160	13538	<hkxhk>		4	45.881	0.115	RACA32	NAATTCTCCAACAAAAATTAATATGGCCTACACCCAGTCTCTGCATCCATG	25	G	A	hk	hk	hh	hk	hk	hk	hk	hk	kk	kk	hk	hk	hk	hk	kk	hk	hk	hk	kk	hk	hh	hk	hk	kk	kk	hh	hk	kk	--	hh	hk	hk	hh	hk	hh	hk	hk
105	1161	13542	<hkxhk>		4	45.969	0.088	RACA32	TTGGATCGGGCCCACAGGTGTGAGGAATATCATAGCTGTAGAACGGCATCA	10	C	G	hk	hk	kk	hk	hk	hk	hk	hk	hh	hh	hk	hk	hk	hk	hh	hk	hk	hk	hh	hk	kk	hk	hk	hh	hh	kk	hk	hh	kk	kk	hk	hk	kk	hk	kk	hk	hk
106	1166	13634	<lmxll>		4	46.823	0.854	RACA32	AAAGATGATCAGGATGGGACTTTAACTTTTTTTATTCTATTTTTAATTGAA	37	T	C	ll	lm	ll	ll	ll	ll	lm	lm	lm	lm	ll	lm	lm	lm	lm	ll	lm	lm	lm	ll	ll	lm	lm	--	lm	ll	ll	lm	ll	ll	lm	lm	ll	ll	ll	ll	lm
107	1158	13472	<hkxhk>		4	46.835	0.012	RACA32	CTCAATTTGTTATGGACGTGCAACAGTTTAAACTTTATCAAATCAGTTGTT	44	A	G	hk	hk	hh	hk	hk	hk	hk	hk	kk	kk	hk	hk	hk	hk	kk	hk	hk	hk	kk	hk	hh	hk	hk	kk	kk	hh	hk	kk	hh	hh	hk	hk	hh	hk	hh	hk	hk
108	1159	13514	<hkxhk>		4	46.897	0.062	RACA32	GAATGGGTTTAAAGTCACTATTTGGAAAAATACCTCCAGGATAAATATACC	17	C	T	hk	hk	kk	hk	hk	hk	hk	hk	hh	hh	hk	hk	hk	hk	hh	hk	hk	hk	hh	hk	kk	hk	hk	hh	hh	kk	hk	hh	--	kk	hk	hk	kk	hk	kk	hk	hk
109	1164	13612	<lmxll>		4	47.46	0.563	RACA32	TGTTATACCAGTTCCTGAAACTGCAGGATTACACCAGTGAGACAGAAGATC	4	A	C	lm	lm	ll	ll	ll	ll	lm	lm	lm	lm	ll	lm	lm	lm	lm	ll	lm	lm	lm	ll	ll	lm	lm	lm	lm	ll	ll	lm	ll	ll	lm	lm	ll	ll	ll	ll	lm
110	1162	13598	<lmxll>	1162	4	47.483	0.023	RACA32	ATGTATGTCTTCATTTTCCTCATCCAACCTGGAATCAGGCTCAAAACCGTA	12	A	G	lm	lm	ll	ll	ll	ll	lm	lm	lm	lm	ll	lm	lm	lm	lm	ll	lm	lm	lm	ll	ll	lm	lm	lm	lm	ll	ll	lm	ll	ll	lm	lm	ll	ll	ll	ll	lm
111	1167	13643	<lmxll>	1162	4	47.483	0	RACA32	AATTGTAAACTGGGGATTCAAATTGAGTCGATTCAGTAATTATGTAGGGAA	41	A	G	lm	lm	ll	ll	ll	ll	lm	lm	lm	lm	ll	lm	lm	lm	lm	ll	lm	lm	lm	ll	ll	lm	lm	lm	lm	ll	ll	lm	ll	ll	lm	lm	ll	ll	ll	ll	lm
112	1163	13610	<lmxll>		4	47.637	0.154	RACA32	AACCATCTGAAGAAAAAAAATGTGACATGATTTATACGTATTAAAATAACA	39	A	T	lm	lm	--	ll	ll	ll	lm	lm	lm	lm	ll	lm	lm	lm	lm	ll	lm	lm	lm	ll	ll	lm	lm	lm	lm	ll	ll	lm	ll	ll	lm	lm	ll	ll	ll	ll	lm
113	1212	14354	<nnxnp>		4	47.646	0.009	RACA32	TCGTAGCCCTTCTATCTCTCTGCTCTGTCTCTCTCTCTCAAGAGTGTGAGT	12	A	T	nn	nn	nn	nn	np	np	nn	nn	nn	np	np	np	nn	nn	np	nn	nn	nn	np	np	nn	nn	nn	np	np	np	np	np	np	nn	nn	nn	nn	np	nn	np	nn
114	1383	16461	<hkxhk>		4	47.907	0.261	RACA32	TTCAAAGATAGTGGGACCTACATTAGAAATAAGGGAAAATCTTCATTCCCT	17	C	T	hk	hk	--	hk	hk	hk	hk	hk	hh	hh	hk	hk	hk	hk	hh	hk	hk	hk	hh	hk	kk	hk	hk	hh	hh	kk	hk	hh	--	--	hk	hk	kk	hk	kk	hk	hk
115	1382	16459	<hkxhk>		4	48.029	0.122	RACA32	CGAGGATCAGGGTTGGGCTGTTTTGCATTTTGAATAAGTTATTTAATGCAA	31	G	A	hk	hk	kk	hk	hk	hk	hk	hk	hh	hh	hk	hk	hk	hk	hh	hk	hk	hk	hh	hk	kk	hk	hk	hh	hh	kk	hk	hh	kk	kk	hk	hk	kk	hk	kk	hk	hk
116	1205	14307	<nnxnp>		4	48.207	0.178	RACA32	TTTCTCCACACGGTGCAGAAGAATCAGTTGCTAATGATGACTCCAAACTCT	11	G	A	nn	nn	nn	nn	np	np	nn	nn	nn	np	np	nn	--	nn	np	nn	nn	nn	np	np	--	nn	nn	np	np	np	np	np	np	nn	nn	nn	nn	np	nn	np	nn
117	1206	14310	<nnxnp>		4	48.361	0.154	RACA32	CTAATGCTGCAGAGAGGCTACCAATAAAGTTAGTACAAAGTGGATTCATGT	16	A	G	nn	nn	nn	nn	np	np	nn	nn	nn	np	np	nn	nn	nn	np	nn	nn	nn	np	np	nn	nn	nn	np	np	np	np	np	np	nn	nn	nn	nn	np	nn	np	nn
118	1371	16335	<hkxhk>		4	48.929	0.568	RACA32	ATCTCTTCCTGTGCTTCTTGAAGCATTTTCATCTGTTCGCTTGACTCATCA	47	A	C	hk	hk	kk	hk	hk	hk	hk	hk	hh	hh	hk	hk	hk	hk	hh	hk	hk	hk	hh	hk	kk	hk	hk	hh	hh	kk	hk	hh	kk	kk	hk	hk	kk	hk	kk	hk	hk
119	1171	13728	<lmxll>		4	49.878	0.949	RACA32	NNCTCCATCAGTAACCTAAGAGGGAAGCAGGAGGCTGGCCGAGGTGGGAGT	40	G	A	lm	lm	ll	ll	ll	ll	lm	lm	lm	lm	ll	lm	lm	lm	lm	ll	lm	lm	lm	ll	ll	lm	lm	lm	lm	ll	ll	lm	ll	ll	lm	lm	ll	--	ll	--	lm
120	1181	13967	<nnxnp>		4	50.599	0.721	RACA32	ATGGAGTCCTACAATCTTCAAGGTCTTTCTGGCTGCAGTTGCATCAAACAC	8	A	C	nn	nn	nn	np	np	np	nn	nn	nn	np	np	nn	nn	nn	np	np	nn	nn	np	np	nn	nn	nn	np	np	nn	np	np	np	nn	nn	nn	nn	np	nn	np	nn
121	1199	14261	<nnxnp>		4	51.046	0.447	RACA32	GGACTCTGGCCTGGAGAACTCCTTAGGTGATCAAAGATAAACAACATGACA	9	T	C	nn	nn	--	np	np	np	nn	nn	nn	np	np	nn	nn	nn	np	nn	nn	nn	np	np	nn	nn	nn	np	np	np	np	np	np	nn	nn	nn	nn	np	nn	np	nn
122	1204	14278	<nnxnp>		4	51.691	0.645	RACA32	AGCTGGAGAGGGAATCCTTAGAAAAAGCGGTGGAGGAGGGTGGGACTGAAA	6	T	A	nn	nn	nn	np	np	np	nn	nn	nn	np	np	nn	nn	nn	np	nn	nn	nn	np	np	nn	nn	nn	np	np	np	np	np	np	nn	nn	nn	nn	np	nn	np	nn
123	1363	16274	<lmxll>		4	51.991	0.3	RACA32	NAATTCAGGATTTCTTTTCGTAAGCCTCCAATTAACCCATTCAGAATGCAG	18	C	T	ll	--	--	lm	lm	lm	ll	ll	ll	ll	lm	ll	ll	ll	ll	lm	ll	ll	ll	lm	lm	ll	ll	ll	ll	lm	lm	ll	--	lm	ll	ll	lm	lm	lm	lm	ll
124	1364	16275	<lmxll>		4	52.021	0.03	RACA32	NAATTCTGTGGAAAACTTTTCTTGTGTCTCTGGTGTGATAGTAATAATTAG	43	A	T	ll	ll	--	lm	lm	lm	ll	ll	ll	ll	lm	ll	ll	ll	ll	lm	ll	ll	ll	lm	lm	ll	ll	ll	ll	lm	lm	ll	lm	lm	ll	ll	lm	lm	lm	lm	ll
125	1203	14273	<nnxnp>		4	52.211	0.19	RACA32	TCACAGAGTACGATCTCAGCTTGTTGCTGCTGTTTAGTTTCATCCGTGCTT	40	C	A	nn	nn	nn	np	np	np	nn	nn	nn	np	np	nn	nn	nn	np	nn	nn	nn	np	np	nn	nn	nn	np	np	np	np	np	np	nn	nn	nn	nn	np	nn	np	nn
126	1350	16116	<lmxll>		4	53.174	0.963	RACA32	GTAAGAAAGAGGTCCAAATGGCTCATTGAGGGTCATTCAGAGCCACTGTCA	12	T	C	ll	ll	--	lm	lm	lm	ll	ll	ll	ll	lm	ll	ll	ll	ll	lm	ll	ll	ll	lm	lm	ll	lm	ll	ll	lm	lm	ll	lm	lm	--	ll	lm	lm	lm	lm	ll
127	1347	16104	<lmxll>	1347	4	53.275	0.101	RACA32	CCGTTACATAGTTCAGGTGTTCCTGAAAGGGAAGCATCTCCTGTTTCAGTC	36	T	C	ll	ll	lm	lm	lm	lm	ll	ll	ll	ll	lm	ll	ll	ll	ll	lm	ll	ll	ll	lm	lm	ll	lm	ll	ll	lm	lm	ll	lm	lm	ll	ll	lm	lm	lm	lm	ll
128	1353	16161	<lmxll>	1347	4	53.275	0	RACA32	GCATGGAGGAATGGACCAAATTAGCAGCTACATTGTAAACCTGCTACAGNN	20	T	A	ll	ll	lm	lm	lm	lm	ll	ll	ll	ll	lm	ll	ll	ll	ll	lm	ll	ll	ll	lm	lm	ll	lm	ll	ll	lm	lm	ll	lm	lm	ll	ll	lm	lm	lm	lm	ll
129	1354	16170	<lmxll>	1347	4	53.275	0	RACA32	ACGTATTTTAAATTTCTTTGAGAAGATGTTCTGTGGTGCAAATGTTCAGCT	16	T	C	ll	ll	lm	lm	lm	lm	ll	ll	ll	ll	lm	ll	ll	ll	ll	lm	ll	ll	ll	lm	lm	ll	lm	ll	ll	lm	lm	ll	lm	lm	ll	ll	lm	lm	lm	lm	ll
130	1352	16131	<lmxll>		4	54.122	0.847	RACA32	GCATGAATGGATGCTTCATCAGAGCGCGGAAGCATCACAAACCAGAAAAAA	50	A	T	ll	ll	lm	lm	lm	lm	ll	ll	ll	ll	lm	ll	ll	ll	ll	lm	ll	ll	ll	lm	lm	ll	lm	ll	ll	lm	lm	ll	lm	lm	ll	ll	lm	lm	lm	lm	--
131	1201	14270	<nnxnp>		4	54.361	0.239	RACA32	CTGTTGGATTATGCACACGTTTAATAGTTTGCTTGTAATCTGAAAGTATTT	9	C	T	np	np	np	nn	nn	nn	np	np	np	nn	nn	np	np	np	nn	np	np	np	nn	nn	np	np	np	nn	nn	nn	nn	--	nn	np	np	np	np	nn	np	nn	np
132	1207	14318	<nnxnp>		4	54.69	0.329	RACA32	TATCTGGATCATCTTGCGGTTGTGCCAGCACCACAGCGAGAACAAAGAGGG	44	C	A	np	np	--	np	nn	nn	np	np	np	nn	nn	nn	np	np	nn	np	np	np	nn	nn	np	np	np	nn	nn	nn	nn	nn	--	np	np	np	np	nn	np	nn	np
133	1366	16284	<lmxll>		4	54.746	0.056	RACA32	TTAAAAAAAGGGGGGGAAAAGAAAATGACTATATGAAGAGGCAGGAATTCA	9	G	A	lm	lm	ll	ll	ll	ll	lm	lm	lm	lm	ll	lm	lm	lm	lm	ll	lm	lm	lm	ll	ll	lm	lm	lm	lm	ll	ll	lm	--	ll	lm	lm	ll	ll	ll	ll	lm
134	1355	16179	<lmxll>	1355	4	55.735	0.989	RACA32	GTATTTTTAAACAAAATATTATATTTATTGAAGCATTTTGGTCATTTTCAG	23	T	C	lm	lm	ll	ll	ll	ll	lm	lm	lm	lm	ll	lm	lm	lm	lm	ll	lm	lm	lm	ll	ll	lm	ll	lm	lm	ll	ll	lm	ll	ll	lm	lm	ll	ll	ll	ll	lm
135	1358	16184	<lmxll>	1355	4	55.735	0	RACA32	TTGTTAGAGCACAGGATTCAGTTTTTCAGGCTGCTGGGTCCTAAAGGTGGA	16	T	C	lm	lm	ll	ll	ll	ll	lm	lm	lm	lm	ll	lm	lm	lm	lm	ll	lm	lm	lm	ll	ll	lm	ll	lm	lm	ll	ll	lm	ll	ll	lm	lm	ll	ll	ll	ll	lm
136	1208	14319	<nnxnp>		4	55.903	0.168	RACA32	ACTTAGTCTTTTTTAAGGTTAAAATATTATGGTTTTAGATTTTCTTCTCTA	6	T	G	np	np	np	np	np	nn	np	np	np	nn	nn	nn	np	np	nn	np	np	np	nn	nn	np	np	np	nn	nn	np	nn	nn	nn	np	np	np	np	nn	np	nn	np
137	1360	16244	<lmxll>		4	56.127	0.224	RACA32	CTAATGACTCGGGATGGAGAGATTGCACAGGCTCCGGGGTTGCCATGGAGA	10	G	A	lm	lm	--	ll	ll	ll	lm	lm	lm	lm	ll	lm	lm	lm	lm	ll	lm	lm	lm	ll	ll	lm	ll	lm	lm	ll	ll	lm	--	ll	lm	lm	ll	ll	ll	ll	lm
138	1346	16100	<lmxll>		4	56.822	0.695	RACA32	NAATTCTGCAGCGAAGCTTAAATGTCCATAATTTGACCCTTTTTTAAATAT	11	C	T	ll	ll	lm	lm	lm	lm	ll	ll	ll	ll	lm	lm	ll	ll	ll	lm	ll	ll	ll	lm	lm	ll	lm	ll	ll	lm	lm	ll	lm	lm	ll	ll	lm	lm	lm	lm	ll
139	1341	16037	<lmxll>		4	58.675	1.853	RACA32	CAGTCGTTCAGATGTGCTTCGTTCAGGAAATGTGGAAAAAAAATCATGAAA	20	G	T	ll	ll	ll	lm	lm	lm	ll	ll	ll	ll	lm	ll	ll	ll	ll	lm	ll	ll	ll	lm	lm	ll	lm	ll	ll	--	lm	ll	lm	lm	ll	ll	lm	lm	lm	lm	ll
140	1367	16288	<lmxll>		4	58.818	0.143	RACA32	ATTTAATTTAATTTAAGAATAAAACATTGTTTTTTCCATATTCACATTGTG	26	T	G	lm	lm	--	ll	ll	ll	lm	lm	lm	lm	ll	lm	lm	lm	lm	ll	lm	lm	lm	ll	ll	lm	lm	lm	lm	ll	ll	lm	--	ll	lm	lm	ll	ll	ll	ll	lm
141	1342	16038	<lmxll>		4	59.589	0.771	RACA32	GAATTCATTTTTCTGCCTGGTCTTTGTGAAGTGGGTCACAGCTGCACTGTN	11	T	G	ll	ll	ll	lm	lm	lm	ll	ll	ll	ll	lm	ll	ll	ll	ll	lm	ll	ll	ll	lm	lm	ll	lm	ll	ll	lm	lm	ll	lm	lm	ll	ll	lm	lm	lm	lm	ll
142	1253	14811	<lmxll>		4	60.085	0.496	RACA32	CCACATCAGTCTCCCCTCTCCCTAGGTAGAGAGCCTGGGTGTCATTCTGAA	45	T	C	ll	ll	ll	lm	lm	lm	ll	ll	ll	ll	lm	ll	ll	ll	ll	lm	ll	ll	ll	lm	lm	ll	lm	ll	ll	lm	lm	ll	lm	lm	ll	ll	lm	lm	lm	lm	ll
143	1186	14044	<nnxnp>		4	60.3	0.215	RACA32	CTGCATCGTGAAAACAAGGATTTGATGTTGTCAAAATTGTAAGTCTGTGCA	17	G	A	np	np	np	nn	nn	--	np	np	np	nn	nn	np	np	np	nn	nn	np	np	nn	nn	np	np	np	nn	nn	nn	nn	nn	nn	np	np	np	np	nn	np	nn	np
144	1165	13630	<lmxll>		4	61.698	1.398	RACA32	GGAGACTGGCTAGTCCACTCCAGGACCTTGAAATGCTTCTTATGAAGCCAC	16	A	T	ll	ll	ll	lm	lm	lm	ll	ll	ll	ll	lm	ll	ll	ll	ll	ll	ll	ll	ll	lm	lm	ll	lm	ll	ll	lm	lm	ll	lm	lm	ll	ll	lm	lm	lm	lm	ll
145	1202	14272	<nnxnp>		4	61.747	0.049	RACA32	TTTCACACAACCTTTCATCAGCCTCAGAACTCCATAAATAAAGACAGTCTC	46	G	C	nn	nn	nn	np	np	np	nn	nn	nn	np	np	nn	nn	nn	np	nn	nn	nn	np	np	nn	nn	nn	np	np	np	np	np	np	nn	nn	nn	nn	np	--	np	nn
146	1348	16112	<lmxll>	1348	4	63.268	1.521	RACA32	GCCTGAAGGACCGAGGTTAGAACCTCATCTGGTTCTGATGACAGAGCAGGA	11	C	T	ll	ll	lm	lm	lm	lm	ll	ll	ll	ll	lm	ll	ll	ll	ll	lm	ll	ll	ll	lm	lm	ll	lm	ll	ll	lm	lm	ll	lm	lm	ll	ll	lm	lm	lm	lm	ll
147	1349	16114	<lmxll>	1348	4	63.268	0	RACA32	TCTCGCGTTTATGAATCGGTTATTATGTCTTTGCTGTAAATGCAGAACCGA	8	T	A	ll	ll	lm	lm	lm	lm	ll	ll	ll	ll	lm	ll	ll	ll	ll	lm	ll	ll	ll	lm	lm	ll	lm	ll	ll	lm	lm	ll	lm	lm	ll	ll	lm	lm	lm	lm	ll
148	5528	71850	<lmxll>		4	64.876	1.608	sc05627	GCAGGAGAAAGCTTCACATGACCCACTTCCGTGATGAATTGGTCCCAGCAC	46	A	G	ll	ll	--	lm	lm	lm	ll	ll	ll	ll	lm	ll	ll	ll	ll	lm	ll	ll	ll	lm	lm	ll	lm	ll	ll	lm	lm	ll	lm	lm	ll	ll	lm	lm	lm	lm	ll
149	1344	16055	<lmxll>		4	65.069	0.193	RACA32	CTTCTGATTTGGTCTCTAAAATTGGGGACAAGAACTGGAAGATCAGAAAGG	22	T	C	ll	ll	--	lm	lm	lm	ll	ll	ll	ll	lm	ll	ll	ll	ll	lm	ll	ll	ll	lm	lm	ll	lm	ll	ll	lm	lm	ll	--	lm	ll	ll	lm	lm	lm	lm	ll
150	1339	16001	<lmxll>		4	65.118	0.049	RACA32	CTTTCTATAAAACAACTTTATTGCACCAAAGGTGCCACTTATGGTGAGGAG	29	A	G	ll	ll	ll	lm	lm	lm	ll	ll	ll	ll	lm	ll	ll	ll	ll	lm	ll	ll	ll	lm	lm	ll	lm	ll	ll	lm	lm	ll	lm	lm	ll	ll	lm	lm	lm	lm	ll
151	1338	15983	<lmxll>	1338	4	65.178	0.06	RACA32	ACGTGAACTCTTGAAAGGTCCATCATAAATATCTACATCAGGAAACTCATG	33	T	C	ll	ll	ll	lm	lm	lm	ll	ll	ll	ll	lm	ll	ll	ll	ll	lm	ll	ll	ll	lm	lm	ll	lm	ll	ll	lm	lm	ll	lm	lm	ll	ll	lm	lm	lm	lm	ll
152	1345	16064	<lmxll>	1338	4	65.178	0	RACA32	ATCAGTACGACCTGAGGAACTCCAGCGCCCCCGTGAGGATCACCGTGGCTC	31	C	T	ll	ll	ll	lm	lm	lm	ll	ll	ll	ll	lm	ll	ll	ll	ll	lm	ll	ll	ll	lm	lm	ll	lm	ll	ll	lm	lm	ll	lm	lm	ll	ll	lm	lm	lm	lm	ll
153	1337	15979	<lmxll>		4	65.862	0.684	RACA32	TCTGTCTTCAGGTCCTCACAACATTCTAAACATGCATGTTTGGAGTTGGCG	45	T	G	ll	ll	ll	lm	lm	lm	ll	ll	ll	ll	lm	ll	ll	ll	ll	lm	ll	ll	ll	lm	lm	ll	lm	ll	ll	lm	lm	ll	lm	lm	ll	ll	lm	lm	lm	lm	ll
154	1187	14047	<lmxll>		4	68.551	2.689	RACA32	GCTCTCATCTCATCAACCTCACCTGAACTGGATCTGCTGCTTCTGATTCTA	33	C	A	ll	ll	--	lm	lm	ll	ll	ll	ll	ll	lm	ll	ll	ll	ll	ll	lm	ll	ll	lm	lm	ll	lm	ll	ll	lm	lm	ll	lm	lm	ll	ll	lm	lm	lm	lm	ll
155	1330	15829	<hkxhk>		4	71.324	2.773	RACA32	GAATTCCAACATGATTCAATGTACGTTGTTGCATTTATGCAAATAAAAAAC	13	A	T	--	hk	--	hh	hh	hk	kk	hk	hk	kk	hk	kk	hk	hk	kk	hh	hk	kk	kk	hh	hk	kk	hk	hk	kk	hk	kk	hk	--	hk	kk	kk	hk	hk	hk	hh	kk
156	1309	15555	<hkxhk>		4	72.886	1.562	RACA32	TTCACCAGCTTCAACACCTGAATCAGCACATGTGAACTCTATGAGGAAATA	41	T	C	kk	hk	kk	hh	hh	hk	kk	hk	hk	kk	hk	kk	kk	hk	kk	hk	hk	kk	kk	hh	hk	kk	hk	hk	kk	hk	kk	hk	hk	hk	kk	kk	hk	hk	hk	hh	kk
157	1256	14832	<lmxll>		4	74.309	1.423	RACA32	GCACCGCCAGATTACAGAAAACGGCTGCTTTTATTAGCAGGCCTGAAAATA	21	C	G	lm	lm	lm	ll	ll	lm	lm	lm	lm	lm	lm	lm	lm	lm	lm	lm	ll	lm	lm	ll	ll	lm	ll	lm	lm	ll	lm	lm	ll	ll	lm	lm	ll	ll	ll	ll	lm
158	1332	15872	<hkxhk>		4	75.156	0.847	RACA32	TCAGCGCTGAGCGTCTTCGTCTGCTGTATTGGTCAAGTTATGGAAGCGATT	36	G	C	kk	hk	kk	hh	hh	hk	kk	hk	hk	kk	hk	kk	kk	hk	kk	hk	hk	kk	kk	hh	hk	kk	hk	hk	kk	hk	kk	hk	hk	hk	kk	kk	hk	hk	hk	hh	kk
159	1333	15875	<efxeg>		4	76.932	1.776	RACA32	GAGCATCAAAGTCGTCATGAAAGTATGAGCAACAATCGATGTTTACCAAGT	31	A	G	fg	ef	fg	ee	ee	ef	fg	ef	ef	fg	ef	fg	fg	ef	fg	ef	--	fg	fg	ee	eg	fg	eg	ef	fg	eg	fg	ef	eg	eg	fg	fg	--	ef	eg	ee	fg
160	1329	15828	<lmxll>	1329	4	77.197	0.265	RACA32	GAATGATCCACCACTCAAACGGCCCTAACAGAATGTTTCCATTTCACTAAT	14	T	A	lm	lm	lm	ll	ll	lm	lm	lm	lm	lm	lm	lm	lm	lm	lm	lm	ll	lm	lm	ll	ll	lm	ll	lm	lm	ll	lm	lm	ll	ll	lm	lm	ll	lm	ll	ll	lm
161	1335	15902	<lmxll>	1329	4	77.197	0	RACA32	GCTGTCTAAACAAAACCTGAAACCAGGAACGTCAGAGTTTAAGGTCTGAAG	3	G	A	lm	lm	lm	ll	ll	lm	lm	lm	lm	lm	lm	lm	lm	lm	lm	lm	ll	lm	lm	ll	ll	lm	ll	lm	lm	ll	lm	lm	ll	ll	lm	lm	ll	lm	ll	ll	lm
162	1290	15207	<lmxll>		4	77.449	0.252	RACA32	TTAGTGAGTCCTCATCGTGTGGGAAGTTCTTCTTAGTTCTTACCTGAGGAT	39	T	A	lm	lm	lm	ll	ll	lm	lm	lm	lm	lm	lm	lm	lm	lm	lm	lm	ll	lm	lm	ll	ll	lm	ll	lm	lm	ll	lm	lm	ll	ll	lm	lm	ll	lm	ll	ll	lm
163	1292	15210	<nnxnp>		4	78.548	1.099	RACA32	TCTGCTACACGTCAGCATTCAGAGTAAACGTCCATCTGCTTCTCATTGACG	25	T	A	nn	np	--	np	np	np	nn	np	np	nn	np	nn	nn	np	nn	np	nn	nn	nn	np	nn	nn	nn	np	nn	nn	nn	np	nn	nn	nn	nn	nn	np	nn	np	nn
164	1317	15592	<nnxnp>		4	78.55	0.002	RACA32	TCACGTGAGCTAAATCATAAAAAAAATCATAACAGTTATAAAAAGTAAATT	27	C	T	nn	np	nn	np	np	np	nn	np	np	nn	np	nn	nn	np	nn	np	nn	nn	nn	np	nn	nn	nn	np	nn	nn	nn	np	nn	nn	nn	nn	nn	np	nn	np	nn
165	1334	15876	<lmxll>		4	78.57	0.02	RACA32	GCTTCAGAGACGACCTTCTGTGGGCAGGAGACCTTCAACCAGGAAAACTCT	25	A	C	lm	lm	lm	ll	ll	lm	lm	lm	lm	lm	lm	lm	lm	lm	lm	lm	ll	lm	lm	ll	ll	lm	ll	lm	lm	ll	lm	lm	ll	ll	lm	lm	ll	lm	ll	ll	lm
166	1328	15785	<lmxll>		4	79.052	0.482	RACA32	ATATTTCTGACACCATTACCTCTTCAAATGCCCCATACTGATGGATGTGGG	47	T	A	lm	lm	lm	ll	ll	lm	lm	lm	lm	lm	lm	lm	lm	lm	lm	lm	ll	lm	lm	--	ll	lm	ll	lm	lm	ll	lm	lm	--	ll	lm	lm	ll	lm	ll	ll	lm
167	1327	15764	<hkxhk>		4	79.482	0.43	RACA32	ACACACTTGGTAGTTGGTCTTTGAATCTGTTGTATGTTTTGGATTCCTTTT	18	C	G	hk	hh	hk	hk	hk	hh	hk	hh	hh	hk	hh	hk	hk	hh	hk	hh	kk	hk	hk	hk	kk	hk	kk	hh	hk	kk	hk	hh	kk	kk	hk	hk	kk	hh	kk	hk	hk
168	1291	15208	<hkxhk>		4	80	0.518	RACA32	GGGTTCTGCACTCAACACAATTACCATATTTTGACAAATGACCTGTATTCT	21	T	G	hk	kk	hk	hk	hk	kk	hk	kk	kk	hk	kk	hk	hk	kk	hk	kk	hh	hk	hk	hk	hh	hk	hh	kk	hk	hh	hk	kk	hh	hh	hk	hk	hh	kk	hh	hk	hk
169	1257	14866	<lmxll>		4	80.522	0.522	RACA32	ATAGCATTACCTGCGATAATGCTAGTGCTGATAGCTGAAAAAACTTAAGCT	45	T	G	lm	lm	lm	ll	ll	lm	lm	lm	lm	lm	lm	lm	lm	lm	lm	lm	ll	lm	lm	ll	ll	lm	ll	lm	lm	ll	lm	lm	ll	ll	lm	lm	ll	ll	ll	ll	lm
170	1274	15054	<hkxhk>		4	82.415	1.893	RACA32	CTCCTTCATGTGGACTTCCCTGAAGTTTCTTCTTTTTTCAAATTGTTTTTG	40	A	G	hk	kk	hk	hk	hk	kk	hk	kk	--	hk	kk	hk	hk	kk	hk	kk	hh	hk	hk	hk	hh	hk	hh	kk	hk	hh	hk	kk	hh	hh	hk	hk	hh	kk	hh	hk	hk
171	1325	15723	<lmxll>		4	84.013	1.598	RACA32	ACGGGAGGATTCAGCAAAATCTACAGGCCTGTGGAGGAGAGATTACAGACN	43	T	G	ll	ll	ll	lm	lm	ll	ll	ll	ll	ll	ll	ll	ll	ll	ll	ll	lm	ll	ll	lm	lm	ll	lm	ll	ll	lm	ll	lm	lm	lm	ll	ll	lm	ll	lm	lm	ll
172	1209	14323	<nnxnp>		4	87.824	3.811	RACA32	GAAAAATGACCAAAAAAAGGGAGGGGCTAAGGGAGGCAGGCAGAGTGGGGT	16	C	A	np	nn	np	nn	nn	nn	np	nn	nn	np	nn	np	np	nn	np	nn	np	np	np	nn	np	np	np	nn	np	np	np	nn	np	np	np	np	np	nn	np	nn	np
173	1221	14448	<nnxnp>		4	89.972	2.148	RACA32	ACGACACGCAGGTGTGTCCACGCCTAAACTTCACTCGCAGACGTTTATGCA	43	T	A	--	nn	--	nn	nn	nn	np	nn	nn	np	nn	np	np	--	np	nn	np	np	--	nn	np	np	np	nn	np	np	np	nn	np	np	np	np	np	nn	np	nn	np
1	3169	38537	<nnxnp>		5	0		RACA36	GGACTGGACGGTAATAGAGAACCAAAAGAGGTAACATTAGTTTCACCAGAT	32	A	G	nn	nn	nn	nn	nn	nn	nn	nn	np	np	np	np	nn	np	nn	nn	np	np	nn	nn	np	np	np	np	nn	np	nn	np	nn	np	nn	np	np	np	np	np	nn
2	3171	38566	<nnxnp>	3171	5	0.133	0.133	RACA36	ATGATTTTTTTTCCCTTCTCAACTCTAAACATTATTGATGGTCATGATTTG	12	C	T	nn	nn	--	nn	nn	nn	nn	nn	np	np	np	np	nn	np	np	nn	np	np	nn	nn	np	np	np	np	nn	np	nn	np	--	np	nn	np	np	np	np	np	nn
3	3175	38627	<nnxnp>	3171	5	0.133	0	RACA36	CAAGCATCCAACAATTTTAAACTGACCTTCTTCAGTAGACACAAGTGTACA	33	A	T	nn	nn	--	nn	nn	nn	nn	nn	np	np	np	np	nn	np	np	nn	np	np	nn	nn	np	np	np	np	nn	np	nn	np	--	np	nn	np	np	np	np	np	nn
4	3180	38665	<nnxnp>		5	0.272	0.139	RACA36	AATCTGCTTTGAAGACCCACTCTGATCACGTCTTGAGCTATTTTCAAAGCA	16	C	T	nn	nn	nn	nn	nn	nn	nn	nn	np	np	np	np	nn	np	np	nn	np	np	nn	nn	np	np	np	np	nn	np	nn	np	nn	np	nn	np	np	np	np	np	nn
5	3182	38678	<nnxnp>		5	2.034	1.762	RACA36	CTGCTAAAATTCACCGTATTGTAAGACTTTAGGTTTTATTAGCAAATTTTG	30	A	T	np	np	np	np	np	np	np	np	nn	nn	nn	nn	np	nn	nn	np	nn	nn	np	np	nn	nn	nn	nn	np	nn	np	nn	np	nn	np	nn	nn	nn	nn	nn	np
6	3163	38506	<nnxnp>	3163	5	3.396	1.362	RACA36	NNNGACTTCAAAATCAAATAAATCTGCATTTAAAAGACAAAAACAAGGACA	14	A	C	np	np	np	np	np	np	np	np	nn	nn	nn	nn	np	nn	np	np	nn	nn	np	np	nn	nn	nn	nn	np	nn	np	nn	np	nn	np	nn	nn	nn	nn	nn	np
7	3166	38514	<nnxnp>	3163	5	3.396	0	RACA36	GTGTTTTTATAGTTGTGCTTTTATCCCTGTTCGGTGACCTTGAGTTATGTG	15	T	C	np	np	np	np	np	np	np	np	nn	nn	nn	nn	np	nn	np	np	nn	nn	np	np	nn	nn	nn	nn	np	nn	np	nn	np	nn	np	nn	nn	nn	nn	nn	np
8	3167	38515	<nnxnp>	3163	5	3.396	0	RACA36	GAACGGGGAAGCCTGGCAGACTTTTTATTGGAAGTGGTCGCATGAATGGGC	38	C	T	np	np	np	np	np	np	np	np	nn	nn	nn	nn	np	nn	np	np	nn	nn	np	np	nn	nn	nn	nn	np	nn	np	nn	np	nn	np	nn	nn	nn	nn	nn	np
9	3177	38650	<nnxnp>		5	3.432	0.036	RACA36	AGGAAAACAGAAAGTGAAGAGATAGTCATATTGGGGAAAACCCATAATTAA	15	C	G	np	np	np	np	np	np	np	np	nn	nn	nn	nn	np	nn	nn	np	nn	nn	np	np	nn	nn	nn	nn	np	nn	np	nn	np	nn	np	nn	nn	nn	nn	nn	np
10	3170	38553	<nnxnp>		5	3.545	0.113	RACA36	CGAGGATCAGGAATGGTGTAGAGTCAACAGTTCAGAAGCTTGTCTGGGAAC	32	C	A	np	np	np	np	np	np	np	np	nn	--	nn	nn	np	nn	nn	np	nn	nn	np	np	nn	nn	nn	nn	np	nn	np	nn	np	nn	np	nn	nn	nn	nn	nn	np
11	3176	38632	<nnxnp>		5	3.837	0.292	RACA36	TAGAGTGCATTATCTGAATGAGGACTGACCTGTAAGAAAACAGTGTTGAGA	35	C	G	np	np	np	np	np	np	np	np	--	--	nn	nn	np	nn	nn	np	nn	nn	np	np	nn	nn	nn	nn	np	nn	np	nn	np	nn	np	nn	nn	nn	nn	nn	np
12	3152	38445	<nnxnp>		5	5.592	1.755	RACA36	NAATTCACTATATTCAGCGGAGCAATCTGTGTTTTTCATAGATGTTTGTGT	8	C	T	np	np	np	np	np	np	np	np	nn	np	nn	nn	np	nn	np	np	nn	nn	np	np	--	nn	nn	nn	np	nn	np	nn	np	--	np	nn	nn	nn	nn	nn	np
13	3162	38495	<nnxnp>		5	5.786	0.194	RACA36	TTTTAGAAAAACTGCAGTCAAGACTCAAAACAGGTGAACATTTTTACTATT	32	A	G	np	np	np	np	np	np	np	np	nn	np	nn	nn	np	nn	np	np	nn	nn	np	np	nn	nn	nn	nn	np	nn	np	nn	np	nn	np	nn	nn	nn	nn	nn	np
14	5297	67222	<lmxll>		5	10.434	4.648	sc00249	GAAGAAGATAGCAGAAAACCTGCTTGCTTCTAACTCTGTGAAGTGAGAACC	28	T	C	lm	ll	ll	ll	lm	ll	ll	ll	ll	ll	ll	ll	ll	ll	ll	lm	lm	ll	lm	lm	lm	lm	ll	lm	ll	ll	--	ll	--	lm	lm	lm	lm	ll	ll	lm	ll
15	5294	67194	<lmxll>		5	11.902	1.468	sc00249	GAGGAGGAGAACCTCCAGAGGAAGAGTGTGGAGCTGGATGAAGAAGGAAGA	36	G	A	lm	ll	--	ll	lm	ll	ll	ll	ll	ll	ll	ll	ll	ll	ll	ll	lm	ll	lm	lm	lm	lm	ll	lm	ll	ll	ll	ll	lm	lm	lm	lm	lm	ll	ll	lm	ll
16	5292	67191	<lmxll>		5	12.709	0.807	sc00249	GGGGTGCCGGATATAAAAATCCGGAGGGCCTGATCCGGCCCCCAGGCCTTG	3	G	A	lm	ll	--	ll	lm	ll	ll	ll	ll	ll	ll	ll	ll	ll	ll	ll	lm	ll	lm	lm	lm	lm	ll	lm	ll	ll	ll	ll	--	lm	lm	lm	lm	ll	ll	lm	ll
17	3121	38163	<nnxnp>	3121	5	13.31	0.601	RACA36	ACTAATACATGTACAGTGCTCCCTCATTTATTGAGGGAGTTACGTTCTAAA	5	T	A	np	np	--	np	np	np	np	np	nn	np	nn	nn	np	nn	np	np	nn	nn	np	np	nn	nn	nn	nn	np	nn	np	nn	np	nn	nn	np	nn	nn	nn	nn	np
18	3125	38186	<nnxnp>	3121	5	13.31	0	RACA36	CAATCCAATAGATCACCTTTGGGATGTGGTGGAACAGGAGATTGGCATCAT	14	A	G	np	np	--	np	np	np	np	np	nn	np	nn	nn	np	nn	np	np	nn	nn	np	np	nn	nn	nn	nn	np	nn	np	nn	np	nn	nn	np	nn	nn	nn	nn	np
19	3120	38153	<nnxnp>		5	13.379	0.069	RACA36	TTGGTTAAAGAAATCAAACCCTAGACTTTTTTTCAGACCTCAAGCCAATTG	6	A	G	np	np	np	np	np	np	np	np	nn	np	nn	nn	np	nn	np	np	nn	nn	np	np	nn	nn	nn	nn	np	nn	np	nn	np	nn	nn	np	nn	nn	nn	nn	np
20	3196	38795	<lmxll>		5	13.74	0.361	RACA36	TCATCAAATGCATCAGGGATTACGTCCTCTGCAACAAGCGCCACTCATGCT	4	C	T	lm	lm	lm	lm	ll	lm	lm	lm	lm	lm	lm	lm	lm	lm	lm	lm	ll	lm	ll	ll	ll	ll	lm	ll	lm	lm	lm	lm	ll	ll	ll	ll	ll	lm	lm	ll	lm
21	3202	38929	<lmxll>		5	14.855	1.115	RACA36	CTAGCTTTCACAAAGTGCCTGGAGAAGACTTTCATTTAGAAACATTTTATT	6	T	A	ll	lm	--	lm	ll	lm	lm	lm	lm	lm	lm	lm	lm	lm	lm	lm	ll	lm	ll	ll	ll	ll	lm	ll	lm	lm	lm	lm	--	ll	ll	ll	ll	lm	lm	ll	lm
22	3131	38260	<nnxnp>		5	15.523	0.668	RACA36	GGTGACTGTGGTGTCATTAGAGTCCAGTGAACTCATTGTCATGTTAAAAAA	13	C	T	nn	nn	nn	nn	nn	nn	nn	nn	np	nn	np	np	nn	np	nn	nn	np	np	nn	nn	np	np	np	np	nn	np	nn	np	nn	np	np	nn	np	np	np	np	nn
23	3193	38775	<lmxll>		5	16.717	1.194	RACA36	TTCATGTGATCACAATGAATCGGCTGACTCCCACGTGCAGAAAAGTGGCTT	30	C	G	ll	lm	lm	lm	ll	lm	lm	lm	lm	lm	lm	lm	lm	lm	lm	lm	ll	lm	ll	ll	ll	ll	lm	ll	lm	lm	lm	lm	ll	ll	ll	ll	ll	lm	lm	ll	lm
24	3195	38780	<lmxll>		5	17.242	0.525	RACA36	NAATTCAGTTTCTCAGTAAAGATTTGCAGACACTGCCTGCAGGAGTGTGGA	15	G	A	ll	lm	lm	lm	ll	lm	lm	lm	lm	lm	lm	lm	lm	lm	lm	lm	ll	lm	ll	ll	ll	ll	lm	ll	lm	lm	lm	lm	ll	ll	ll	ll	ll	lm	lm	ll	lm
25	5295	67200	<lmxll>		5	17.481	0.239	sc00249	TACAGTTTTATTTTTTCAATGTTTGTCCTCTTTAGTCACTAAAAACTGAGG	10	T	G	ll	lm	--	lm	ll	lm	lm	lm	lm	lm	lm	lm	lm	lm	lm	lm	ll	lm	ll	ll	ll	ll	lm	ll	lm	lm	--	lm	ll	ll	ll	ll	ll	lm	lm	ll	lm
26	5399	69108	<lmxll>		5	20.149	2.668	sc00312	GTCATCACTGGTGACTTTAACTCTATAAATCTGTCTTAGTTTACAAAAGAA	25	T	A	ll	lm	lm	lm	ll	lm	lm	lm	lm	lm	lm	lm	lm	lm	lm	lm	ll	lm	ll	ll	ll	ll	lm	ll	lm	lm	lm	lm	--	ll	ll	ll	ll	lm	lm	ll	lm
27	3197	38815	<lmxll>		5	20.252	0.103	RACA36	TTATTAAAAAACTAAATCACATCTTAGATACAATTAAGTTTTTTTTCCATG	33	T	C	ll	lm	lm	lm	ll	lm	lm	lm	lm	lm	lm	lm	lm	lm	lm	lm	ll	lm	ll	ll	ll	ll	lm	ll	lm	lm	lm	lm	ll	ll	ll	ll	ll	lm	lm	ll	lm
28	3199	38835	<lmxll>		5	20.394	0.142	RACA36	GCACCTGCAACAGCTTTCTCACATTCGTTTGTGCACCTGCTCCCACGTGCA	37	T	G	ll	lm	lm	lm	ll	lm	lm	lm	lm	lm	lm	lm	lm	lm	lm	lm	--	lm	ll	ll	ll	ll	lm	ll	lm	lm	lm	lm	ll	ll	ll	ll	ll	lm	lm	ll	lm
29	3194	38776	<lmxll>	3194	5	20.42	0.026	RACA36	ACAGTAGGTCAAAAAGTAAATGTTATTAAAATGTCACCGGTGATGGCTCCT	6	G	T	ll	lm	--	lm	ll	lm	lm	lm	lm	lm	lm	lm	lm	lm	lm	lm	ll	lm	ll	ll	ll	ll	lm	ll	lm	lm	lm	lm	ll	ll	ll	ll	ll	lm	lm	ll	lm
30	5250	66241	<lmxll>	3194	5	20.42	0	sc00219	CAAGGTTGTTTGTGTCCAGAGGAATTAATTTGGACTTCGGGAAATCTTCCA	38	G	A	ll	lm	--	lm	ll	lm	lm	lm	lm	lm	lm	lm	lm	lm	lm	lm	ll	lm	ll	ll	ll	ll	lm	ll	lm	lm	lm	lm	ll	ll	ll	ll	ll	lm	lm	ll	lm
31	5441	69907	<lmxll>		5	20.457	0.037	sc00369	TCTGCAGCTCCATGTCTCAGCCAAAGCTAATGGTAACGTTAGCATTAGCAT	36	C	T	ll	lm	lm	lm	ll	lm	lm	lm	lm	lm	lm	lm	lm	lm	lm	lm	ll	lm	ll	ll	ll	ll	lm	ll	lm	lm	lm	lm	ll	ll	ll	ll	ll	lm	lm	ll	lm
32	3116	38069	<nnxnp>		5	20.721	0.264	RACA36	GGCGCACAGTTCACAACGCATATCAGACACCCCAAGCGCCAGTACCAGTCT	31	C	G	np	np	np	np	np	np	np	np	nn	np	nn	nn	np	nn	np	np	nn	nn	np	np	nn	nn	nn	nn	np	nn	np	nn	np	nn	nn	np	nn	nn	nn	nn	np
33	5302	67436	<lmxll>		5	22.103	1.382	sc00255	AATCAGGTTTGGGAGTTTGATGAGTATGATAATCAACCTGGGTGAGCACAT	24	T	A	ll	lm	lm	lm	ll	lm	lm	lm	lm	lm	lm	lm	lm	lm	lm	lm	ll	lm	ll	ll	ll	ll	lm	ll	lm	lm	ll	lm	ll	ll	ll	ll	ll	lm	lm	ll	lm
34	5303	67444	<lmxll>		5	23.643	1.54	sc00255	TGGAAGGGTATCGTATCAAAGAGAAAGTTGTGGCAGCCACTGTTGATAATG	39	C	T	ll	lm	lm	lm	ll	lm	lm	lm	lm	lm	lm	lm	lm	lm	lm	lm	ll	lm	ll	ll	ll	ll	lm	ll	lm	lm	ll	lm	ll	ll	ll	ll	ll	lm	lm	ll	lm
35	3115	38060	<hkxhk>		5	25.621	1.978	RACA36	GAATTCAACTATGAAAATATGGGAGGGAGTGACTGGCTACTCTAAAATAAC	29	T	A	hk	hk	--	kk	hk	hk	hk	hk	hk	kk	hk	hk	hk	hk	kk	--	hh	hk	hk	hk	hh	hh	hk	hh	kk	hk	hk	hk	hk	hh	hh	hk	hh	hk	hk	hh	kk
36	3133	38280	<lmxll>		5	28.389	2.768	RACA36	GGACAGCACTAGAAAATGGCGAACTCCCTATATAGTGCACTATGTAGTGAG	26	C	A	ll	ll	lm	lm	ll	ll	ll	ll	lm	lm	lm	lm	ll	lm	lm	lm	ll	lm	ll	ll	ll	ll	lm	ll	lm	lm	ll	lm	ll	ll	ll	ll	ll	lm	lm	ll	lm
37	3130	38247	<lmxll>		5	30.176	1.787	RACA36	GCCACATTTCTTTTTTAACCACCATTTAACATAATCATCATTGTGTACATG	38	C	T	ll	ll	--	lm	ll	ll	ll	ll	lm	lm	lm	lm	ll	lm	lm	lm	ll	lm	ll	ll	ll	ll	lm	ll	lm	lm	ll	lm	ll	ll	ll	ll	ll	lm	lm	ll	lm
38	3080	37727	<nnxnp>		5	30.562	0.386	RACA36	CTGTGTTCATCTAAGCACACTTAAATATGTGTGTGTGTCATTTCTGCTTAG	5	C	T	nn	np	np	np	np	np	np	nn	nn	np	np	nn	nn	nn	np	np	nn	nn	np	np	nn	nn	nn	nn	np	nn	np	nn	np	nn	nn	np	nn	np	nn	nn	np
39	3118	38089	<lmxll>		5	31.696	1.134	RACA36	ACAAAGCCGTGCAGCAAACCTGTTTAAAATGCTTCCCTGGACTTCTCTTCT	20	T	A	ll	--	lm	lm	ll	ll	ll	ll	lm	lm	lm	lm	ll	lm	lm	lm	ll	lm	ll	ll	ll	ll	lm	ll	lm	lm	ll	lm	ll	ll	ll	ll	ll	lm	lm	ll	lm
40	3076	37647	<nnxnp>		5	33.214	1.518	RACA36	ATTTTTTAAATCCATATTACCAGAACACATACAGTAAGATTAAGTGTTAAC	17	A	T	nn	np	np	np	np	np	np	nn	nn	np	np	nn	nn	nn	np	np	nn	nn	np	np	nn	nn	nn	nn	np	nn	np	nn	np	nn	nn	np	nn	np	nn	nn	np
41	3075	37639	<nnxnp>		5	33.812	0.598	RACA36	TCATTTTTAAAATAACATTAACACTATAATACATTAACAGAGAGATTTCCT	25	G	A	nn	np	nn	np	np	np	np	nn	nn	np	np	nn	nn	nn	np	np	nn	nn	np	np	nn	nn	nn	nn	np	nn	np	nn	np	nn	nn	np	nn	np	nn	nn	np
42	3099	37870	<lmxll>		5	34.505	0.693	RACA36	TTTTGAATAATTGCAAATAGATTTACAGCTTGCTTAGAAAGTCTGAAAGGG	12	G	T	ll	ll	--	lm	ll	ll	ll	ll	lm	lm	lm	lm	ll	lm	lm	lm	ll	lm	ll	ll	ll	ll	lm	ll	lm	lm	ll	lm	ll	ll	ll	ll	ll	lm	lm	ll	lm
43	3105	37924	<lmxll>		5	34.598	0.093	RACA36	AATCTGTCTTTGAACCTGAAAGGGATTACATGGGAATGGATGACTGGCTGT	21	G	A	ll	ll	lm	lm	ll	ll	ll	ll	lm	lm	lm	lm	ll	lm	lm	lm	ll	lm	ll	ll	ll	ll	lm	ll	lm	lm	ll	lm	ll	ll	ll	ll	ll	lm	lm	ll	lm
44	3102	37902	<lmxll>		5	34.779	0.181	RACA36	GTGAATGGGAGTTTATGTATCTGTTTACGCATTTCTCAATTATGAGACTGA	12	T	G	ll	ll	lm	lm	ll	ll	ll	ll	lm	lm	lm	lm	ll	lm	lm	lm	ll	lm	ll	ll	ll	ll	lm	ll	lm	lm	ll	lm	--	ll	ll	ll	ll	lm	lm	ll	lm
45	3096	37861	<lmxll>		5	35.813	1.034	RACA36	CTGTTTACACTTTTTTCCACTAGTTTACACCCCCAACCTAATATTACAAGT	41	T	C	ll	ll	lm	lm	ll	ll	ll	ll	lm	lm	lm	lm	ll	lm	lm	lm	ll	lm	ll	ll	ll	ll	lm	ll	lm	lm	ll	lm	--	ll	ll	ll	ll	lm	lm	ll	lm
46	3100	37886	<lmxll>		5	35.884	0.071	RACA36	CAGAGTAAAATTAGGTTAATAGACTGACCAGCCCGATTCTTATCCCTGGAA	26	A	G	ll	ll	lm	lm	ll	ll	ll	ll	lm	lm	lm	lm	ll	lm	lm	lm	ll	lm	ll	ll	ll	ll	lm	ll	lm	lm	ll	lm	--	ll	ll	ll	ll	lm	lm	ll	lm
47	3110	37972	<lmxll>		5	35.887	0.003	RACA36	GCAATCTGGACAGAAGTAGGAAATATTATGCACTTTTTTATTGTGTTTTGG	15	G	T	ll	ll	lm	lm	ll	ll	ll	ll	lm	lm	lm	lm	ll	lm	lm	lm	ll	lm	ll	ll	ll	ll	lm	ll	lm	lm	ll	lm	ll	ll	ll	ll	ll	lm	lm	ll	lm
48	3111	37978	<lmxll>		5	35.889	0.002	RACA36	GTTTGAGAGAGGTGATGCTAATGCAGACCATATTCCACATGTACTCCATAC	14	A	C	ll	ll	--	lm	ll	ll	ll	ll	lm	lm	lm	lm	ll	lm	lm	lm	ll	lm	ll	ll	ll	ll	lm	ll	lm	lm	ll	lm	ll	ll	ll	ll	ll	lm	lm	ll	lm
49	3088	37812	<lmxll>		5	35.889	0	RACA36	TTTTTAAAATCCTATTATACTGAACAGATTTTTCTACGAAGGTTTGAACTT	5	A	T	ll	--	lm	lm	ll	ll	ll	ll	lm	lm	lm	lm	ll	lm	lm	lm	ll	lm	ll	ll	ll	ll	lm	ll	lm	--	ll	lm	ll	ll	ll	ll	ll	lm	lm	ll	lm
50	3103	37904	<lmxll>		5	35.903	0.014	RACA36	AGATTTAATTTACAGTTCAGAAGTTTGGGATAAATGTTTGTGGAATGGCAT	16	T	C	ll	ll	lm	lm	ll	ll	ll	ll	lm	lm	lm	lm	ll	lm	lm	lm	ll	lm	ll	ll	ll	ll	lm	ll	lm	lm	ll	lm	ll	ll	ll	ll	ll	lm	lm	ll	lm
51	3097	37865	<lmxll>		5	35.938	0.035	RACA36	CCGCAACCGGAGAGGAGACCATGTCGGGCAGACTGATAGAACCCATGCCCG	37	A	T	ll	ll	--	lm	ll	ll	ll	ll	lm	lm	lm	lm	ll	lm	lm	lm	ll	lm	ll	ll	ll	ll	lm	ll	lm	lm	ll	lm	ll	ll	ll	ll	ll	lm	lm	ll	lm
52	3107	37945	<lmxll>		5	35.944	0.006	RACA36	CTATGTACATAGTTGGTCTTCTCCCTTCTCATTTTAACACAAAAAAGTATC	11	G	C	ll	ll	lm	lm	ll	ll	ll	ll	lm	lm	lm	lm	ll	lm	lm	lm	ll	lm	ll	ll	ll	ll	lm	ll	lm	lm	ll	lm	ll	ll	ll	ll	ll	lm	lm	ll	lm
53	3101	37887	<lmxll>		5	35.952	0.008	RACA36	GAAGCCTCTGTTTCCCAAATCTCCTCTGACGGGATGAGGCTTTTGGAGCTG	15	C	A	ll	ll	--	lm	ll	ll	ll	ll	lm	lm	lm	lm	ll	lm	lm	lm	ll	lm	ll	ll	ll	ll	lm	ll	lm	lm	ll	lm	--	ll	ll	ll	ll	lm	lm	ll	lm
54	3095	37860	<lmxll>		5	35.969	0.017	RACA36	GTTCAGCTGGACAGCTCAGATACTTCTGGCTATTTTAGTTGTACTTGTAAT	37	G	A	ll	ll	lm	lm	ll	ll	ll	ll	lm	lm	lm	lm	ll	lm	lm	lm	ll	lm	ll	ll	ll	ll	lm	ll	lm	lm	ll	--	ll	--	ll	ll	ll	lm	lm	ll	lm
55	3078	37692	<nnxnp>		5	37.744	1.775	RACA36	GATTGCTGGGAAAGAACAAGTTGCCACGTCTGCTGTCTCTCTGGTGACTGT	6	T	C	nn	np	--	np	np	np	np	nn	nn	np	np	nn	nn	nn	np	np	nn	nn	np	np	nn	nn	nn	nn	np	nn	np	nn	np	nn	nn	np	nn	np	nn	nn	np
56	3079	37714	<lmxll>		5	38.281	0.537	RACA36	AACAGGCATTTACATAATAAGATCATAATAATCAACTTTAAACAAGTTAAA	36	T	A	lm	lm	--	ll	lm	lm	lm	lm	ll	lm	--	ll	lm	ll	ll	ll	lm	ll	lm	lm	lm	lm	ll	lm	ll	ll	lm	ll	--	lm	lm	lm	lm	ll	ll	lm	ll
57	3123	38173	<lmxll>		5	40.278	1.997	RACA36	GCAACGCTGCGCCATGCCCTCAGGGTGTTCCCACCTTCAGAGACATGCAGT	4	C	T	ll	ll	lm	lm	ll	ll	ll	ll	lm	lm	lm	lm	ll	lm	lm	lm	ll	lm	ll	ll	ll	ll	lm	ll	lm	--	ll	lm	--	ll	ll	ll	ll	lm	lm	ll	lm
58	3036	37212	<nnxnp>		5	43.842	3.564	RACA36	GGAGGACATTCCAGAAACCTCATCTTCAGTGGGCAGTGGATGTGACTGAGG	26	C	T	np	nn	nn	nn	nn	nn	nn	np	np	nn	nn	np	np	np	nn	nn	np	np	nn	nn	np	np	nn	np	nn	nn	nn	np	nn	np	np	nn	np	nn	np	nn	np
59	3041	37247	<hkxhk>		5	43.978	0.136	RACA36	CTATCAGACAACGTCCCCAAAGCTAATTGCATTGCAGTCCCATCATGCTTT	36	G	A	kk	hh	--	hk	hh	hh	hh	hk	hk	hh	hk	kk	hk	kk	hk	hk	hk	kk	hh	hh	hk	kk	hk	hk	hk	hh	hh	kk	--	hk	hk	hh	hk	hk	kk	hh	kk
60	3055	37395	<nnxnp>		5	45.865	1.887	RACA36	AAGAATACACCACATCCAGCGATGTTGCAGGACTATTTCTAGTCTCATTCA	18	G	C	np	nn	--	nn	nn	nn	nn	np	np	nn	nn	np	np	np	nn	nn	--	np	nn	nn	np	np	np	np	nn	nn	nn	np	--	np	np	nn	np	nn	np	nn	np
61	3051	37363	<nnxnp>		5	46.236	0.371	RACA36	CCAGAAAGTCAGGATGCCGAGAGAGGAACTGTGGTTTTGTATGAGTGGCAG	32	G	A	np	nn	--	nn	nn	nn	nn	np	np	nn	nn	np	np	np	nn	nn	np	np	nn	nn	np	np	np	np	nn	nn	nn	np	nn	np	np	nn	np	nn	np	nn	np
62	3043	37272	<efxeg>		5	48.33	2.094	RACA36	AGCCCCCCTCATGTTTGAGTTAATGTTAGCATCATTATTGAAAAATATTAA	4	T	C	fg	ee	ef	ef	ee	ee	ee	eg	eg	ee	ef	fg	eg	fg	ef	ef	eg	fg	ee	ee	eg	fg	ef	eg	ef	ee	ee	fg	--	eg	eg	ee	--	ef	fg	ee	fg
63	3028	37143	<efxeg>		5	49.219	0.889	RACA36	AACGTAAAAAGATTTGAACTCTTTCTTAACTGAATTTCTCAGACATTTGTT	15	G	C	fg	ee	ef	--	ee	ee	ee	eg	eg	ee	ef	fg	eg	fg	ef	ef	eg	fg	ee	ef	eg	fg	ef	eg	ef	ee	ee	fg	ee	eg	eg	ee	eg	ef	fg	ee	fg
64	3034	37187	<efxeg>		5	49.612	0.393	RACA36	ACAAGAAAAACCATGAACCTCCAGTTTAAAAGCCTTCTGTGAACTGCAAGG	3	A	C	fg	ee	--	ef	ee	ee	ee	eg	eg	ee	ef	fg	--	fg	ef	ef	eg	fg	ee	ef	eg	fg	ef	--	ef	ee	ee	fg	ee	eg	eg	ee	eg	ef	fg	ee	fg
65	3064	37513	<lmxll>		5	50.753	1.141	RACA36	AAGCATATATGTGTGCATTTTTAAGGAACTTTTCATAAAATGAAAAAAATG	14	G	A	lm	ll	lm	lm	ll	ll	ll	ll	ll	ll	lm	lm	ll	lm	lm	lm	ll	lm	ll	ll	ll	lm	lm	ll	lm	lm	ll	lm	ll	ll	ll	ll	ll	lm	lm	ll	lm
66	3052	37387	<lmxll>		5	50.819	0.066	RACA36	GTGTGCTGCGGGTCTCAATCAAAAGAAAAATCTCACCGAAATCCGCTTTTA	37	G	A	lm	ll	--	lm	ll	ll	ll	ll	ll	ll	lm	lm	ll	lm	lm	lm	ll	lm	ll	ll	ll	lm	lm	ll	lm	lm	ll	lm	ll	ll	ll	ll	ll	lm	lm	ll	lm
67	3053	37390	<lmxll>		5	50.845	0.026	RACA36	TAAATTAGTCCTGCAGTTTCTGACACCAGACTGACTGACAACCTGTTGAGG	13	C	T	lm	--	lm	lm	ll	ll	ll	ll	ll	ll	lm	lm	ll	lm	lm	lm	ll	lm	ll	ll	ll	lm	lm	ll	lm	lm	ll	lm	--	ll	ll	ll	ll	lm	lm	ll	lm
68	3050	37358	<hkxhk>		5	51.74	0.895	RACA36	CGGGGATTACCTCTAGAAAAGAAGGCAGCTTTAATTAATCTCTGTCTAACT	11	T	C	kk	hh	--	hk	hh	hh	hh	hk	hk	hh	hk	kk	hk	kk	hk	hk	hk	kk	hh	hh	hk	kk	kk	hk	kk	hk	hh	kk	--	hk	hk	hh	hk	hk	kk	--	kk
69	3066	37531	<lmxll>		5	52.214	0.474	RACA36	NAATTCTCAACTAAACACAGTTATTTTGTCTGTAACGTGTAGGATGTGTCG	18	A	C	lm	ll	--	lm	ll	ll	ll	ll	ll	ll	lm	lm	ll	ll	lm	--	ll	lm	ll	ll	ll	lm	lm	ll	lm	lm	ll	lm	--	ll	ll	ll	ll	lm	lm	ll	lm
70	3054	37392	<lmxll>		5	52.807	0.593	RACA36	TGAGCCAAGTAGAAAAGAAAATTCATTTCTCTTTCATCCTTTAAGTTTCAA	31	T	A	ll	lm	ll	ll	lm	lm	lm	lm	lm	lm	ll	ll	lm	--	ll	ll	lm	ll	lm	lm	lm	ll	ll	lm	ll	ll	lm	ll	lm	lm	lm	lm	lm	ll	ll	lm	ll
71	3024	37035	<lmxll>		5	54.385	1.578	RACA36	AACAAAATGCAAGTTATTTTTCTGAAAATATACTTTCTTTAATAGTAATTT	7	T	G	lm	ll	--	lm	ll	ll	ll	ll	ll	ll	lm	lm	ll	lm	lm	lm	ll	lm	ll	lm	ll	lm	lm	ll	lm	ll	ll	lm	--	ll	ll	ll	ll	lm	lm	ll	lm
72	3023	37006	<lmxll>		5	54.675	0.29	RACA36	CTGGTCATGTGCTTTTGTTTATAAGTTTCAGCTCCCAACAGGAAAATCTGC	29	A	G	lm	ll	lm	lm	ll	ll	ll	ll	ll	ll	lm	lm	ll	lm	lm	lm	ll	lm	ll	lm	ll	lm	lm	ll	lm	ll	ll	lm	ll	ll	ll	ll	ll	lm	lm	ll	lm
73	3061	37456	<hkxhk>		5	54.709	0.034	RACA36	GGACATTGTGCCCAGCGATATCATAGCTGGCCTGGTGCTTCTGCGCCAGCG	39	T	C	kk	hh	hk	hk	hh	hh	hh	hk	hk	hh	hk	kk	hk	kk	hk	hk	hk	kk	hh	hh	hk	kk	kk	hk	hk	hk	hh	kk	hh	hk	hk	hh	hk	hk	kk	hk	kk
74	3232	39250	<nnxnp>		5	54.741	0.032	RACA36	TCTGACGGGAGCGGTGACAGGTGTGTTTGTGTGCCTCCAGACTTACCGGAG	19	A	G	nn	nn	nn	nn	nn	nn	nn	nn	np	nn	nn	np	np	np	np	np	np	np	nn	nn	nn	np	np	np	nn	nn	nn	nn	nn	np	np	np	np	nn	nn	nn	np
75	3244	39402	<hkxhk>		5	56.339	1.598	RACA36	TTGGTCTCAGTTGTTATGGAGAAGTTGCAATCCGACTGTTAAGGGTGTCTT	14	T	A	hk	hk	hk	hk	hh	hh	hh	hk	hk	hh	hk	kk	hk	kk	kk	hk	hk	hk	hh	hk	hk	kk	hk	kk	hh	hh	hh	hk	hh	hk	hk	kk	hk	hk	kk	hh	kk
76	3243	39359	<hkxhk>		5	57.67	1.331	RACA36	TATCAAATACGCCAGCAGAATGATTTTACTTCTGGAGAATAGTGCATTGCA	10	G	A	hk	hk	hk	hk	hh	hh	hh	hh	hk	hh	hk	kk	hk	kk	kk	kk	hk	hk	hh	hk	hk	--	hk	kk	hh	hh	hh	hk	hh	hk	hk	kk	hk	hk	hk	hh	kk
77	3241	39337	<hkxhk>		5	57.692	0.022	RACA36	GTAATGTTCATTATAGGTTCAGCTGAGACACAATATAAAAGAGAATTTAGG	33	T	A	hk	hk	hk	hk	kk	kk	kk	kk	hk	kk	hk	hh	hk	hh	hh	hh	hk	hk	kk	hk	hk	hh	hk	hh	kk	kk	kk	hk	kk	hk	hk	hh	hk	hk	hk	kk	hh
78	3235	39292	<hkxhk>		5	57.692	0	RACA36	ACATTAGCCGTTGCAGACTTTCTGATGTGTGAAGAACTGATTTACACCCAC	8	C	T	hk	hk	hk	hk	hh	hh	hh	hh	hk	hh	hk	kk	hk	kk	kk	kk	hk	hk	hh	hk	hk	kk	hk	kk	hh	hh	hh	hk	hh	hk	hk	kk	hk	hk	hk	hh	kk
79	3251	39497	<nnxnp>		5	59.648	1.956	RACA36	ATAATCGATTTATAAATATATAAATCGATTTAGCACACAAAGCTAAAATCT	7	A	G	nn	nn	nn	nn	nn	nn	nn	np	np	nn	nn	np	np	np	np	nn	np	np	nn	nn	nn	np	nn	np	nn	nn	nn	nn	nn	np	np	np	np	nn	np	nn	np
80	3266	39589	<lmxll>		5	60.482	0.834	RACA36	ATCATTTGTCAGGTTTAAAAATGTGTTTTGTGTAACTCAAATGTTCNNNNN	31	G	T	--	lm	lm	lm	ll	ll	ll	ll	ll	ll	lm	lm	ll	lm	--	lm	ll	lm	ll	lm	ll	lm	lm	ll	ll	ll	ll	lm	ll	ll	ll	lm	ll	lm	lm	ll	lm
81	3263	39580	<lmxll>		5	60.64	0.158	RACA36	GAACAACTGGTTTGCCAGTTTAGAGCTGGCAGGGGCCAAACTCGTCTATGA	40	C	T	lm	lm	lm	lm	ll	ll	ll	ll	ll	ll	lm	lm	ll	lm	lm	lm	ll	lm	ll	lm	ll	lm	lm	ll	ll	ll	ll	lm	ll	ll	ll	lm	ll	lm	lm	ll	lm
82	3006	36813	<nnxnp>		5	60.971	0.331	RACA36	ACTGGAAAAGGTAACTGAAAATAGGAAAGGGATATAAGAAGATATGCAAAG	45	G	C	np	nn	nn	nn	nn	nn	nn	np	np	nn	nn	np	np	np	nn	nn	np	np	nn	nn	nn	np	nn	np	nn	nn	nn	nn	nn	np	np	np	np	nn	np	nn	np
83	2996	36737	<nnxnp>		5	61.943	0.972	RACA36	GAGATGCTTTTAAAACATGAGAACTGCAATAACCAAAAATGTTGCATCAAG	32	C	T	np	nn	--	nn	nn	nn	nn	np	np	nn	nn	np	np	np	np	nn	np	np	nn	nn	nn	np	nn	np	nn	nn	nn	nn	--	np	np	np	np	nn	np	nn	np
84	3253	39517	<lmxll>		5	62.183	0.24	RACA36	GCCATGTTTTAATCCTAGAGTGTGTATTAAAACGTCTTTCAGCAGAGCAGT	32	C	T	--	ll	ll	ll	lm	lm	lm	lm	lm	lm	ll	ll	lm	ll	ll	ll	lm	ll	lm	ll	lm	ll	ll	lm	lm	lm	lm	ll	lm	lm	lm	ll	lm	ll	ll	lm	ll
85	3256	39536	<lmxll>		5	63.032	0.849	RACA36	TCCAATTTTTGTGACAGTCATTGCAGTTAGAGCTCAACTGAGAGCATTTTC	3	A	C	ll	ll	ll	ll	lm	lm	lm	lm	lm	lm	ll	ll	lm	ll	ll	ll	lm	ll	lm	ll	lm	ll	ll	lm	lm	lm	lm	ll	lm	lm	lm	ll	lm	ll	ll	lm	ll
86	2993	36721	<nnxnp>		5	63.062	0.03	RACA36	GCAAGATTAGACTCATGTTGTTGCTCAACTCTGACAGCTAACAGAAGTAAA	10	A	T	np	nn	--	nn	nn	nn	nn	np	np	nn	nn	np	np	np	np	nn	np	np	nn	nn	nn	np	nn	np	nn	nn	nn	nn	--	np	np	np	np	nn	np	nn	np
87	2992	36718	<nnxnp>		5	63.143	0.081	RACA36	TCCATGCTTCTAACCCTGTTTCCTAATGAAACTAAAGTCCATGAAGGACTC	14	C	T	np	nn	nn	nn	nn	nn	nn	np	np	nn	nn	np	np	np	np	nn	np	np	nn	nn	nn	np	nn	np	nn	nn	nn	nn	nn	np	np	np	np	nn	np	nn	np
88	2982	36544	<lmxll>		5	63.791	0.648	RACA36	GTCCAAATGCTGCATTGCTGGATTCCCTGTCACTTCTCATTTTCAAGGACC	37	C	T	ll	ll	ll	ll	lm	lm	lm	lm	lm	lm	ll	ll	lm	ll	ll	ll	lm	ll	lm	ll	lm	ll	ll	lm	ll	lm	--	ll	lm	--	lm	ll	lm	ll	ll	lm	ll
89	2979	36533	<hkxhk>		5	64.211	0.42	RACA36	TAATTTTAAAGAATCATTTTAGTATTTTCCGTCTCTATCAAACTGCTTTTA	42	C	T	--	hk	hk	hk	hh	hh	hh	hk	hk	hh	hk	kk	hk	kk	kk	--	hk	kk	hh	hk	hh	kk	hk	--	hk	hh	hh	hk	hh	hk	hk	kk	hk	hk	kk	hh	kk
90	2995	36735	<nnxnp>		5	64.287	0.076	RACA36	CTTATGCAGATGCTGTGATCTACTACAAAGTGTATACTAGAGCAATTTGGA	33	A	G	nn	np	np	np	np	np	np	nn	nn	np	np	nn	nn	--	nn	np	nn	nn	np	np	np	nn	np	nn	np	np	np	np	np	nn	nn	nn	nn	np	nn	np	nn
91	3020	36942	<nnxnp>		5	65.265	0.978	RACA36	TTAGTCAATTTACCCTACATCAATAAGCCCCCCAGAAGAAGCCTGAAAATA	28	C	A	np	nn	nn	nn	nn	nn	nn	np	np	nn	nn	np	np	np	nn	nn	np	np	nn	nn	nn	np	nn	np	nn	nn	nn	nn	nn	np	np	np	np	nn	np	nn	np
92	3265	39583	<nnxnp>		5	66.977	1.712	RACA36	TTGTTCGTTAAGGCAAATTAGTATTGTAGGTGTGTAATAAACCTTACCAGA	45	C	A	np	--	np	np	np	np	np	nn	nn	np	np	nn	nn	nn	nn	np	nn	nn	np	np	np	nn	np	nn	np	np	np	np	np	nn	nn	nn	nn	np	nn	np	nn
93	3261	39564	<efxeg>		5	69.211	2.234	RACA36	GACTCTGTTCAGCATCAAACTAAAAAATGTTGGTTTCTCTTATTCTCACTG	5	T	A	ee	ee	ee	ee	ef	ef	ef	fg	fg	ef	ee	eg	fg	eg	eg	ee	fg	eg	ef	ee	ef	eg	ee	fg	ef	ef	ef	ee	ef	fg	fg	eg	--	ee	eg	ef	eg
94	3268	39629	<hkxhk>		5	71.143	1.932	RACA36	CAGGTCATTCTTTAAAGTCTTTCCTCATCCTGAAAGCCTGATATGTCAAAA	21	T	C	hk	hk	hk	hk	kk	kk	kk	hk	hk	kk	hk	hh	hk	hh	hh	hk	hk	hh	kk	hk	kk	hh	hk	hk	kk	kk	kk	hk	kk	hk	hk	hh	hk	hk	hh	kk	hh
95	2984	36605	<nnxnp>		5	71.42	0.277	RACA36	TTAGTGGTGGTGAACTCGAGGTTATGCCATCTTCTCACAAAAAATGTGAAT	16	C	T	nn	np	--	np	np	np	np	nn	nn	np	np	nn	nn	nn	nn	np	nn	nn	np	np	np	nn	np	nn	np	np	np	np	--	nn	nn	nn	nn	np	nn	np	nn
96	2986	36625	<nnxnp>		5	71.769	0.349	RACA36	AGATGTTCATGTGTGGAGATAATTATATTTGTAAACCTTAGCTACATATTT	41	T	C	np	nn	nn	nn	nn	nn	nn	np	np	nn	nn	np	np	np	np	nn	np	np	nn	nn	nn	np	nn	np	nn	nn	nn	nn	nn	np	np	np	np	nn	np	nn	np
97	3258	39553	<nnxnp>		5	72.544	0.775	RACA36	NAATTCTAATAAGCCACGCCTCCTTAGTATGTTCTGTGCTGTTATGTCTTT	17	G	T	np	np	--	np	np	np	np	nn	nn	np	np	nn	nn	nn	nn	np	nn	nn	np	np	np	nn	np	nn	np	np	np	np	np	nn	nn	nn	nn	np	nn	np	nn
98	3255	39534	<nnxnp>		5	73.799	1.255	RACA36	GGACAAAAACATGTCTTCATCTAAAATGAAAATCACTTTAAAACACTACGT	33	G	C	np	np	np	np	np	np	np	nn	nn	np	np	nn	nn	nn	nn	np	nn	nn	np	np	np	nn	np	nn	np	np	np	np	np	nn	nn	nn	nn	np	nn	np	nn
99	3254	39527	<nnxnp>		5	73.89	0.091	RACA36	GTCACACACTACTGAACTTCAAGTGAATTTTAAGTAGCCCTCTGAAATCTG	7	A	G	np	np	--	np	np	np	np	nn	nn	np	np	nn	nn	nn	nn	np	nn	nn	np	np	np	nn	np	nn	np	np	np	np	np	nn	nn	nn	nn	np	--	np	nn
100	3260	39560	<nnxnp>		5	73.958	0.068	RACA36	AATGTTTTGTAAATTGCCGTTTTAACTTTTATTGTTGCTTTTTACAAATAA	23	T	A	np	np	--	np	np	np	np	nn	nn	np	np	nn	nn	nn	nn	np	nn	nn	np	np	np	nn	np	nn	np	np	np	np	--	nn	nn	nn	nn	np	nn	np	nn
101	3249	39465	<efxeg>		5	75.315	1.357	RACA36	GTACCCGTGTCCTTTTGATTCCAGGAAATCCAACTGCCAATGGTACATGTT	15	T	A	eg	eg	eg	eg	--	fg	fg	ef	ef	fg	eg	ee	ef	ee	ee	eg	ef	ef	fg	eg	eg	ee	eg	ee	--	fg	fg	eg	--	ef	ef	ee	ef	eg	ee	fg	ee
102	3226	39210	<lmxll>		5	75.358	0.043	RACA36	TGTTTCAACACTGTCGGATATCTTAAGTTTCTTACCAAAGTGTTCAGGTTT	24	A	C	lm	lm	--	lm	ll	ll	ll	--	ll	ll	lm	lm	ll	lm	--	lm	ll	ll	ll	lm	lm	lm	lm	lm	ll	ll	ll	lm	--	ll	ll	lm	ll	lm	lm	ll	lm
103	3252	39507	<nnxnp>		5	75.649	0.291	RACA36	NAATTCATCATTCAGTCATTCATCACTCTGTTTGTGTTGTCGTTAGTATTG	45	G	T	np	np	--	np	np	np	np	nn	nn	np	np	nn	nn	nn	nn	np	nn	nn	np	np	np	nn	np	nn	np	np	np	np	--	nn	nn	nn	nn	np	nn	np	nn
104	3233	39253	<lmxll>		5	75.879	0.23	RACA36	ATTAGTCTACAAGTGGATGCATCAGAATGGAGTAGAGCAGGGAACTTGTGG	33	A	G	lm	lm	lm	lm	ll	ll	ll	ll	ll	ll	lm	lm	ll	lm	lm	lm	ll	ll	ll	lm	lm	lm	lm	lm	ll	ll	ll	lm	ll	ll	ll	lm	ll	lm	lm	ll	lm
105	3245	39417	<nnxnp>		5	77.618	1.739	RACA36	CCTTTAGAGCAGTAATGTTGTGGGGCTGTCGAAAGACCCAGACACGTTTCA	26	T	C	np	np	np	np	np	np	np	nn	nn	np	np	nn	nn	nn	nn	np	nn	nn	np	np	np	nn	np	nn	np	np	np	np	np	nn	nn	nn	nn	np	nn	np	nn
106	3216	39106	<lmxll>		5	84.061	6.443	RACA36	GCAGGATTTACTCTTTTTACTACATAAAGTGACGGATTAGTCAGTAAAAAC	21	A	G	lm	lm	--	lm	ll	ll	ll	ll	ll	ll	lm	lm	ll	lm	ll	lm	lm	ll	ll	lm	lm	lm	lm	lm	ll	ll	ll	lm	--	ll	ll	lm	ll	lm	lm	ll	lm
107	3062	37470	<nnxnp>		5	89.184	5.123	RACA36	TAGAAGGTCAGAGAGGAAGTCCTCTGATAGAACCGAGTCAGAACCAAGCAG	22	A	T	nn	nn	nn	nn	nn	nn	np	nn	np	nn	nn	np	np	np	np	np	nn	np	nn	nn	nn	np	np	np	nn	nn	nn	nn	nn	np	nn	np	np	nn	nn	nn	np
1	3929	48247	<lmxll>		6	0		RACA35	ATAATTCTCTAATTCCCTTATAATAATTCTATTCTAAAGTCTGATGAATTC	27	T	C	ll	ll	--	ll	ll	lm	lm	lm	lm	lm	ll	lm	ll	lm	lm	lm	ll	lm	ll	lm	ll	ll	lm	ll	ll	lm	ll	--	--	ll	lm	lm	lm	lm	ll	ll	lm
2	5391	68986	<hkxhk>		6	0.827	0.827	sc00307	NAATTCTTCCTCCATTTCAGCCTTTTAACATCAGCTAAGCCTTTTTATTCT	35	T	G	hh	hh	hk	hh	hh	kk	kk	kk	kk	hk	kk	hk	hh	kk	kk	hk	hh	kk	hh	hk	hk	hh	hk	hh	hk	kk	hk	hk	hk	hh	hk	kk	kk	hk	hk	hh	hk
3	874	9890	<lmxll>		6	1.122	0.295	RACA34	GGAGTGTTAGTGAGAGGTGTGGGTGTTCTGGCACGACCTGCGCTATATTCT	15	G	A	lm	lm	ll	lm	lm	ll	ll	ll	ll	ll	lm	ll	lm	ll	ll	ll	lm	ll	lm	lm	lm	lm	ll	lm	lm	ll	lm	lm	lm	lm	ll	ll	ll	lm	lm	lm	ll
4	894	10070	<lmxll>		6	2.129	1.007	RACA34	GCAGTGAGTGTTTATCGTCCTAAACTATGTTTTAGGTTTTGTTTTGCATCA	34	G	T	ll	ll	--	ll	ll	lm	lm	lm	lm	lm	ll	lm	ll	lm	lm	lm	ll	lm	ll	ll	ll	ll	lm	ll	ll	--	ll	--	ll	ll	lm	lm	lm	lm	--	ll	lm
5	888	10027	<lmxll>		6	2.484	0.355	RACA34	GCTTTGGCTTCCTCACAGACTCTTTACTCCCTAGAGAAACTTTACAAATAT	32	A	G	ll	ll	lm	ll	ll	lm	lm	lm	lm	lm	ll	lm	ll	lm	lm	lm	ll	lm	ll	ll	ll	ll	lm	ll	ll	lm	ll	ll	--	ll	lm	lm	lm	ll	ll	ll	lm
6	881	9939	<lmxll>		6	3.175	0.691	RACA34	GCTTTAGAAGTTCTGCTGCTGTTGCACAAAAGTCCGACCCGAGCCTAAGGT	21	T	C	ll	ll	--	ll	ll	lm	lm	lm	lm	lm	ll	lm	ll	lm	lm	lm	ll	lm	ll	ll	ll	ll	lm	ll	ll	lm	ll	ll	--	ll	lm	lm	lm	ll	ll	ll	lm
7	2000	24513	<hkxhk>		6	3.795	0.62	RACA4	ACTTCAACGTGACAGCCAAGAATTTCTTTGTATAACAGAGCAGAAAATAAG	36	A	G	hh	hh	hk	hh	hh	kk	kk	kk	kk	hk	hk	hk	hh	kk	kk	hk	hh	kk	hh	hk	hk	hh	hk	hh	hh	kk	hk	hk	hk	hh	hk	kk	kk	hk	hk	hh	hk
8	877	9912	<lmxll>		6	4.119	0.324	RACA34	TCAAAGACCCACGCCGACAAATTAATTTTCTGATAACAGAAGAGTGTGTTA	10	A	G	lm	lm	ll	lm	lm	ll	ll	ll	ll	ll	lm	ll	lm	ll	ll	ll	lm	ll	lm	lm	lm	lm	ll	lm	lm	ll	lm	lm	lm	lm	ll	ll	ll	lm	lm	lm	ll
9	879	9935	<lmxll>		6	5.084	0.965	RACA34	ACAAAGACGAGATGATGTACTCCAAGTGTTAAATATTTTGTGGGTCTTTTC	20	T	C	lm	lm	--	lm	lm	ll	ll	ll	ll	ll	lm	ll	lm	ll	ll	ll	lm	ll	lm	lm	lm	lm	ll	lm	lm	ll	lm	lm	lm	lm	ll	ll	ll	lm	lm	lm	ll
10	875	9899	<lmxll>	875	6	5.132	0.048	RACA34	CCCAACATTTTTCATCATTTTTTGGCTGCTTTTACACATCTGTCCTCCCCC	33	A	G	lm	lm	ll	lm	lm	ll	ll	ll	ll	ll	lm	ll	lm	ll	ll	ll	lm	ll	lm	lm	lm	lm	ll	lm	lm	ll	lm	lm	lm	lm	ll	ll	ll	lm	lm	lm	ll
11	886	10006	<lmxll>	875	6	5.132	0	RACA34	TCTTTAGTTTTGACAGGACAACATAATATTTGCATAATAGGTTACATTTTT	21	C	G	lm	lm	ll	lm	lm	ll	ll	ll	ll	ll	lm	ll	lm	ll	ll	ll	lm	ll	lm	lm	lm	lm	ll	lm	lm	ll	lm	lm	lm	lm	ll	ll	ll	lm	lm	lm	ll
12	3928	48243	<lmxll>		6	5.409	0.277	RACA35	CAACATTACTGGTGCAACGAACAGTTTAGATCCAGATTCCAGCTCAGATGA	18	G	A	lm	lm	ll	lm	lm	ll	ll	ll	ll	ll	lm	ll	lm	ll	ll	ll	lm	ll	lm	lm	lm	lm	ll	lm	lm	ll	lm	lm	lm	lm	ll	--	ll	ll	lm	lm	ll
13	3924	48208	<lmxll>		6	6.13	0.721	RACA35	ACGTAACTGTATTTTTTGAACCATGAGGCACTTAAAACACTGGAATTTGTT	17	G	T	lm	lm	--	lm	lm	ll	ll	ll	--	ll	lm	ll	lm	ll	ll	--	lm	ll	lm	lm	lm	lm	ll	lm	lm	ll	lm	--	lm	lm	ll	ll	ll	ll	lm	lm	ll
14	895	10080	<lmxll>		6	6.463	0.333	RACA34	GACCGCTGGGGGACGTAAATAACATCAAAACGGCATCAGGGAGGGCTGCAC	27	A	G	ll	ll	lm	ll	ll	lm	lm	lm	lm	lm	ll	lm	ll	lm	lm	lm	ll	lm	ll	ll	ll	ll	lm	ll	ll	lm	ll	ll	ll	ll	lm	lm	lm	lm	ll	ll	lm
15	990	11181	<nnxnp>		6	6.717	0.254	RACA34	GACAAAAGCATTTTTTTTAAAGAATAGATGTGGCTGTATGAAGATAAAAAT	24	T	C	np	np	np	np	np	nn	nn	np	nn	nn	nn	np	np	np	np	np	np	np	np	nn	nn	np	np	np	nn	nn	nn	nn	nn	np	np	np	nn	nn	np	np	nn
16	5392	69001	<lmxll>		6	7.166	0.449	sc00307	TGAGGCCATAAATAAAAAAACATGTTAGATTCTTTTAGTTTCTATTAAGTT	44	T	C	ll	ll	lm	ll	ll	lm	lm	lm	lm	lm	ll	lm	ll	lm	lm	lm	ll	lm	ll	ll	ll	ll	lm	ll	ll	lm	ll	ll	ll	ll	lm	lm	lm	lm	ll	ll	lm
17	3925	48221	<lmxll>	3925	6	7.218	0.052	RACA35	ATGGAATGTTAGTGTCTTATTTCTGGAACGAAAAACATTTTTCATTTTTGT	36	A	G	ll	ll	lm	ll	ll	lm	lm	lm	lm	lm	ll	lm	ll	lm	lm	lm	ll	lm	ll	ll	ll	ll	lm	ll	ll	lm	ll	ll	ll	ll	lm	lm	lm	lm	ll	ll	lm
18	3926	48234	<lmxll>	3925	6	7.218	0	RACA35	TTGAAACAAGCTGCACACAAACAAAGCAGAGACGTGATGTTCAACCATCAA	12	G	A	ll	ll	lm	ll	ll	lm	lm	lm	lm	lm	ll	lm	ll	lm	lm	lm	ll	lm	ll	ll	ll	ll	lm	ll	ll	lm	ll	ll	ll	ll	lm	lm	lm	lm	ll	ll	lm
19	3927	48235	<lmxll>		6	7.223	0.005	RACA35	TCATGTTTGATGCAGTGCTGCAGGTCAATCAAAGCCCAATTAGTGCTGAAA	46	T	A	ll	--	lm	ll	ll	lm	lm	lm	lm	lm	ll	lm	ll	lm	lm	lm	ll	lm	ll	ll	ll	ll	lm	ll	ll	lm	ll	ll	ll	ll	lm	lm	lm	lm	ll	ll	lm
20	2317	28419	<lmxll>		6	7.256	0.033	RACA38	GCAGTAAAGTCATGGGAGTGGGAATGATGTCCTTCCTGTTTAGGTCATGTG	36	T	A	ll	ll	--	ll	ll	lm	lm	lm	lm	lm	ll	lm	ll	lm	lm	lm	ll	lm	ll	ll	ll	ll	lm	ll	ll	lm	ll	ll	--	ll	lm	lm	lm	lm	ll	ll	lm
21	887	10010	<lmxll>	887	6	8.038	0.782	RACA34	NNNNGACTAGCAGTGAAAAACAAAAAGGTATATTTTTTAGAAATGCACTAA	9	G	C	ll	ll	lm	ll	ll	lm	lm	lm	lm	lm	ll	lm	ll	lm	lm	lm	ll	lm	ll	ll	ll	ll	lm	ll	ll	lm	ll	ll	ll	ll	lm	lm	lm	ll	ll	ll	lm
22	889	10037	<lmxll>	887	6	8.038	0	RACA34	TTATTAATAACTTCTGTGGAAAAACCTGAAGTAAAATGTCAGAATGTCAAA	25	C	T	ll	ll	lm	ll	ll	lm	lm	lm	lm	lm	ll	lm	ll	lm	lm	lm	ll	lm	ll	ll	ll	ll	lm	ll	ll	lm	ll	ll	ll	ll	lm	lm	lm	ll	ll	ll	lm
23	873	9876	<lmxll>		6	8.042	0.004	RACA34	TAATGTCATGATTTGTTTTTCTGTGAAACATTGTAGTAGCGTCATGTTGTA	32	G	A	ll	ll	--	ll	ll	lm	lm	lm	lm	lm	ll	lm	ll	lm	lm	lm	ll	lm	ll	ll	ll	ll	lm	ll	ll	lm	ll	ll	ll	ll	lm	lm	lm	ll	ll	ll	lm
24	872	9875	<lmxll>		6	8.517	0.475	RACA34	CCTGATAAGATTGACGTTTTATTTACACCTTTTTAAGTCAATTAAAAGCTG	12	G	C	ll	ll	lm	ll	ll	lm	lm	lm	lm	lm	ll	lm	ll	lm	lm	lm	ll	lm	ll	ll	ll	ll	lm	ll	ll	lm	ll	ll	ll	ll	lm	lm	lm	ll	ll	ll	lm
25	987	11167	<nnxnp>		6	8.932	0.415	RACA34	AACAGTTGACTGTGGAATATTAACATTTCATGACAGGATTTGTTGCACAGG	30	C	T	np	np	np	np	np	nn	nn	np	nn	--	nn	np	np	np	np	nn	np	np	np	nn	nn	np	np	np	nn	nn	nn	nn	nn	np	np	np	nn	nn	np	np	nn
26	1000	11330	<nnxnp>		6	12.654	3.722	RACA34	TTAATATAGCCACTTTTGTAGACATTTCTGATGTCTTCTCTCACCAGAGCG	31	T	C	nn	nn	--	nn	nn	np	np	nn	np	np	np	nn	nn	nn	nn	nn	nn	np	nn	np	np	nn	nn	nn	np	np	np	np	np	nn	nn	nn	np	np	nn	nn	np
27	999	11329	<nnxnp>		6	14.005	1.351	RACA34	CTCTGATGCAACACGTCAGGATGCAAATGTTATCTAATTACCGCTGCATTA	23	C	T	nn	nn	--	nn	nn	np	np	nn	np	np	np	nn	nn	nn	nn	nn	nn	np	nn	np	np	nn	nn	nn	np	np	np	np	np	--	nn	nn	np	np	nn	nn	np
28	997	11316	<nnxnp>		6	14.057	0.052	RACA34	ATTTCATGCTTCCTACAAGAAGGATGGAAACAGGTTTCCATGCTAGCAGGT	8	T	C	nn	nn	nn	nn	nn	np	np	nn	np	np	np	nn	nn	nn	nn	nn	nn	np	nn	np	np	--	nn	nn	np	np	np	np	np	nn	nn	nn	np	np	nn	nn	np
29	989	11179	<nnxnp>		6	15.3	1.243	RACA34	AAAGATGATCATAGTGGGACAAAGTTAAAAGTGTTCAGGCTGCACCTTCCT	3	G	T	nn	nn	nn	nn	nn	np	np	nn	np	np	np	nn	nn	nn	nn	nn	nn	nn	nn	np	np	nn	nn	nn	np	np	np	np	np	nn	nn	nn	np	np	nn	nn	np
30	996	11293	<nnxnp>		6	16.945	1.645	RACA34	TACATGTGTGAGAGCTGGGAGTTTGTCAGTTGACAGCATGCTTTCTTGCAT	45	C	T	nn	nn	--	nn	nn	np	np	nn	np	np	np	nn	nn	nn	nn	nn	nn	nn	nn	np	np	nn	nn	--	np	np	np	np	--	nn	nn	nn	np	np	nn	nn	np
31	850	9667	<hkxhk>		6	17.537	0.592	RACA34	GCAATACTCACTGATCATCAGAATACAATTTCATATTAATCCAGAAATCCC	33	T	A	hk	hk	--	hk	hk	hk	hk	hk	hk	kk	hh	kk	hk	hk	kk	kk	hk	hh	hk	hk	hh	hk	kk	hk	hh	hk	hh	hh	hh	hk	kk	kk	hk	hk	hh	hk	hk
32	849	9664	<lmxll>		6	18.826	1.289	RACA34	TTTGACAGGCATCTCCAGGGTTTCAGGTTAAAAGATTTATATTAAGGGTTT	29	A	T	lm	lm	ll	lm	lm	ll	ll	ll	ll	ll	lm	ll	lm	lm	ll	ll	lm	lm	lm	ll	lm	lm	ll	lm	lm	ll	lm	lm	lm	lm	ll	ll	ll	lm	lm	lm	ll
33	845	9619	<lmxll>		6	21.606	2.78	RACA34	ATAATGTTCATTATGGATAATGTTCCAAATGTGATGCTACGTTATTTATTA	36	C	A	--	ll	--	ll	lm	lm	lm	lm	lm	lm	ll	lm	ll	ll	lm	lm	ll	ll	ll	lm	ll	ll	lm	ll	ll	--	ll	ll	--	ll	lm	lm	lm	ll	ll	ll	lm
34	807	9211	<hkxhk>		6	24.641	3.035	RACA34	GAATTCTATTTATTTTTTAACTATTTCTGTTCCAATTACACATCAGAAAAA	18	A	T	hh	hh	hk	hh	hk	kk	kk	hk	kk	kk	hk	hk	hh	hh	hk	hk	hh	hk	hh	kk	hk	hh	hk	hh	hk	kk	hk	hk	hk	hh	hk	hk	kk	hh	hk	hh	kk
35	810	9232	<lmxll>		6	25.32	0.679	RACA34	GCTGTCAAGACTCACTCTTGGATCTCTAGTTAGGAAATCAGTTTTTTGAAG	31	A	G	lm	lm	ll	lm	ll	ll	ll	ll	ll	ll	lm	ll	lm	lm	ll	ll	lm	lm	lm	ll	lm	lm	ll	lm	lm	ll	lm	lm	lm	lm	ll	ll	ll	lm	lm	lm	ll
36	840	9515	<lmxll>		6	26.122	0.802	RACA34	GGATCCAGACTTATTGGAGATCCAGTGGAGCTGGGTATTTTTCTAGCACTA	25	T	A	ll	ll	lm	ll	lm	lm	lm	lm	lm	lm	ll	lm	ll	ll	lm	lm	ll	ll	ll	lm	ll	ll	lm	ll	ll	lm	ll	ll	ll	ll	lm	lm	lm	ll	ll	ll	lm
37	838	9503	<lmxll>		6	26.217	0.095	RACA34	CTTGGTAGCATTGTATGATCTTAAAGGTACTTGCAGATGAAAATCAAAGGA	12	G	A	ll	ll	--	ll	lm	lm	lm	lm	lm	lm	ll	lm	ll	ll	lm	lm	ll	ll	ll	lm	ll	ll	lm	ll	ll	lm	ll	ll	ll	ll	lm	lm	lm	ll	ll	ll	lm
38	844	9592	<nnxnp>		6	26.289	0.072	RACA34	GGCCTCATCAGTTTGCCAAAAGAAGAGTTGTGACTCATCAGTGAATAGGAC	28	T	C	np	np	np	np	np	nn	nn	nn	nn	np	nn	np	np	np	np	np	np	nn	np	nn	nn	np	np	np	nn	nn	nn	nn	nn	np	np	np	nn	np	nn	np	nn
39	843	9550	<lmxll>		6	26.881	0.592	RACA34	AGAGTTTGAAAGAAGCTCTCACATTCTTTAAATCTAGAAAACTATCTAGTT	15	C	T	ll	ll	lm	ll	lm	lm	lm	lm	lm	lm	ll	lm	ll	ll	lm	lm	ll	ll	ll	lm	ll	ll	lm	ll	ll	lm	ll	ll	ll	ll	lm	lm	lm	ll	ll	ll	lm
40	972	10991	<nnxnp>		6	28.16	1.279	RACA34	GATCTGCACAGTTAACATCATTTTCTCTAAATTATGCTGAGTCTGACAGCA	18	C	A	nn	nn	--	nn	nn	nn	np	nn	nn	np	np	nn	nn	nn	nn	np	nn	nn	nn	np	np	nn	nn	nn	np	np	np	np	--	nn	nn	nn	np	np	nn	np	np
41	803	9167	<lmxll>	803	6	28.201	0.041	RACA34	TTAATGAATCCATCTTTGTCCTCTCGCTCCCCCTCCCAACCCCCCAGGCAC	23	T	A	lm	lm	ll	lm	ll	ll	ll	ll	ll	ll	lm	ll	lm	lm	ll	ll	lm	lm	lm	ll	lm	lm	ll	lm	lm	ll	lm	lm	lm	lm	ll	ll	ll	lm	lm	lm	ll
42	834	9458	<lmxll>	803	6	28.201	0	RACA34	CTGGACTTACTTAAAGCGTTCCCAAAACATCAGCAGTTTGGTTTACTTTTT	33	C	T	lm	lm	ll	lm	ll	ll	ll	ll	ll	ll	lm	ll	lm	lm	ll	ll	lm	lm	lm	ll	lm	lm	ll	lm	lm	ll	lm	lm	lm	lm	ll	ll	ll	lm	lm	lm	ll
43	804	9173	<lmxll>		6	28.328	0.127	RACA34	GTTGAAGAGTCAGAGGATACAGAATCAAAAAAAGAAGAAAGATGATGGAAA	11	A	G	lm	lm	ll	lm	ll	ll	ll	ll	ll	ll	lm	ll	lm	lm	ll	ll	lm	lm	lm	ll	lm	lm	ll	lm	lm	ll	lm	lm	lm	lm	ll	ll	ll	lm	lm	lm	ll
44	835	9464	<lmxll>		6	28.515	0.187	RACA34	GCTGTCACATAAAGGATGAACTCTGAGCGTGTGAGTGCATGGTAGGGATAA	10	A	G	lm	lm	ll	lm	ll	ll	ll	ll	ll	ll	lm	ll	lm	lm	ll	ll	lm	lm	lm	ll	lm	lm	ll	lm	lm	ll	lm	lm	lm	lm	ll	ll	ll	lm	lm	lm	ll
45	823	9347	<hkxhk>		6	29.482	0.967	RACA34	GCTGCCCAGACACACAGAATTTGACCACAGTTGGAAACGGAAGGAACTGGT	37	C	T	hk	hk	hh	hk	hh	hk	hk	hh	hk	hh	kk	hh	hk	hk	hh	hh	hk	kk	hk	hk	kk	hk	hh	hk	kk	hk	kk	kk	kk	hk	hh	hh	hk	hk	kk	hk	hk
46	820	9321	<hkxhk>		6	29.679	0.197	RACA34	AATCCTCAGATCCTTTCTAGGGATCTTCAAGACATTCCTGATTTAGTGTTA	28	A	G	hk	hk	hh	hk	hh	hk	hk	hh	hk	hk	kk	hh	hk	hk	hh	hh	hk	kk	hk	hk	kk	hk	hh	hk	kk	hk	kk	kk	kk	hk	hh	hh	hk	hk	kk	hk	hk
47	805	9174	<lmxll>		6	29.949	0.27	RACA34	TCGAGTCATGAGTCAGACGATCAGCACCATTTCCCAGGAACTGACTGTACT	16	A	G	lm	lm	ll	lm	ll	ll	ll	ll	ll	ll	lm	ll	lm	lm	ll	ll	lm	lm	lm	ll	lm	lm	ll	lm	lm	ll	lm	lm	--	lm	ll	ll	ll	lm	lm	lm	ll
48	806	9181	<lmxll>		6	30.007	0.058	RACA34	GACATCATGCACAGTTCTGCTGGAATACTATTCTATAGCTGAGGGCCGGCA	10	A	G	lm	lm	ll	lm	ll	--	ll	--	ll	ll	lm	ll	lm	lm	ll	ll	lm	lm	lm	ll	lm	lm	ll	lm	lm	ll	lm	lm	lm	lm	ll	ll	ll	lm	lm	lm	ll
49	824	9373	<lmxll>		6	30.142	0.135	RACA34	TTAACGTGGCAGTTCTTTGGTCACGTTTTCATGAGAATTATCGTGGTCTTA	39	A	G	lm	lm	--	lm	ll	ll	ll	ll	ll	ll	lm	ll	lm	lm	ll	ll	lm	lm	lm	ll	lm	lm	ll	lm	lm	ll	lm	lm	--	lm	ll	ll	ll	lm	lm	lm	ll
50	964	10902	<nnxnp>		6	31.898	1.756	RACA34	TCCTTATTTTTTCTATTGATCCCTTCAGCAGAAACTACATTACAGCATATA	13	T	A	nn	nn	--	nn	--	nn	np	nn	np	--	np	nn	nn	nn	nn	np	nn	nn	nn	np	np	nn	nn	np	np	--	np	np	np	nn	nn	nn	np	np	nn	np	--
51	959	10868	<nnxnp>		6	33.617	1.719	RACA34	TTAAACATTTTCGTTTTCCTTGTCTAAGTATGGCTCAAATCTGTACGAGTG	5	C	T	nn	nn	nn	nn	nn	nn	np	nn	nn	np	np	nn	nn	nn	nn	np	nn	nn	nn	np	np	nn	nn	np	np	np	np	np	np	nn	nn	nn	np	np	nn	np	np
52	970	10970	<nnxnp>		6	34.589	0.972	RACA34	CTGTTAGGAAAAAATATTCCCCCGTTATTCTCTACCTAGAAGGCCATCAAT	7	T	G	nn	nn	--	nn	nn	nn	np	nn	nn	np	np	nn	nn	nn	nn	np	nn	nn	nn	np	np	nn	nn	np	np	np	np	np	np	--	nn	nn	np	np	nn	np	np
53	966	10910	<nnxnp>		6	34.634	0.045	RACA34	TTTAGTCGGCTGTGAGAACACGGTGATTCTCTTTACCCTGACCAGACAGAA	41	C	G	nn	nn	nn	nn	nn	nn	np	nn	nn	np	np	nn	nn	nn	nn	np	nn	nn	nn	np	np	nn	nn	np	np	np	np	np	np	nn	nn	nn	np	np	nn	np	np
54	983	11127	<lmxll>		6	35.542	0.908	RACA34	TCTCAAGAGCTGTTGTGTTTCAGAACTGTCGCTGGGCAACACAGACTTTAA	23	A	G	ll	ll	lm	ll	lm	lm	lm	lm	lm	lm	ll	ll	ll	ll	ll	lm	ll	ll	ll	lm	ll	ll	lm	ll	ll	lm	ll	ll	lm	lm	lm	lm	lm	ll	ll	ll	lm
55	981	11101	<lmxll>		6	36.632	1.09	RACA34	GTACTGACAACTCTAGTGCCAAAAGAGCATGAAGCAAAAACGACATGTTCT	40	C	T	ll	ll	lm	ll	lm	lm	lm	lm	lm	lm	ll	ll	ll	ll	ll	lm	ll	ll	ll	lm	ll	ll	lm	ll	ll	lm	ll	ll	lm	lm	lm	lm	lm	ll	ll	ll	lm
56	954	10828	<nnxnp>		6	36.921	0.289	RACA34	TTTATTACAGAATATCCAAAGTACCTATTTAGTCAATGTCTTTCGAATACT	22	A	G	nn	nn	nn	nn	nn	nn	np	nn	nn	np	np	nn	nn	nn	nn	np	np	nn	nn	np	np	nn	nn	np	np	np	np	np	np	nn	nn	nn	np	np	nn	np	np
57	854	9764	<nnxnp>		6	37.481	0.56	RACA34	ACAAGCGCCAGAGGTTGTAAATATTGTAGATCAGTTGTAATTTTCCATTAA	23	G	T	nn	nn	nn	nn	--	np	np	np	np	nn	np	nn	--	nn	np	nn	nn	np	nn	np	np	nn	nn	nn	nn	np	np	np	np	nn	nn	nn	np	nn	np	nn	nn
58	977	11052	<lmxll>		6	40.609	3.128	RACA34	GTCAAACTCAAAGGTGACACCAAGGACAGCAAGGAGTGTTTGTCAGTCCCT	30	A	G	lm	lm	ll	lm	ll	--	ll	ll	ll	ll	lm	lm	lm	lm	lm	ll	lm	lm	lm	ll	lm	lm	ll	lm	lm	ll	lm	lm	--	ll	ll	ll	ll	lm	lm	lm	ll
59	940	10649	<nnxnp>	940	6	40.718	0.109	RACA34	ATGTAGAAAAAAACAAAATTGCACTGAAAAATCTGTGAAACAGTGAGACCG	46	G	A	nn	nn	nn	nn	nn	nn	np	nn	nn	np	np	nn	nn	nn	nn	np	np	nn	nn	nn	np	nn	nn	np	np	np	np	np	np	nn	nn	nn	np	np	nn	np	np
60	949	10763	<nnxnp>	940	6	40.718	0	RACA34	TGTTGAAAGCTGCTACATCGACACTCTGAACCTGAAAGACAGCAGAGAAAA	28	A	G	nn	nn	nn	nn	nn	nn	np	nn	nn	np	np	nn	nn	nn	nn	np	np	nn	nn	nn	np	nn	nn	np	np	np	np	np	np	nn	nn	nn	np	np	nn	np	np
61	947	10755	<nnxnp>		6	41.048	0.33	RACA34	TGCACCTTACTGTCTTTAAATGTGTCCGACTTCAAATATACCTTCATCCCT	40	C	A	nn	nn	nn	nn	nn	nn	np	--	nn	np	np	nn	nn	nn	nn	np	np	nn	nn	nn	np	nn	nn	np	np	np	np	np	np	nn	nn	nn	np	np	nn	np	np
62	904	10197	<lmxll>		6	42.533	1.485	RACA34	TTTTTCCCAGTCTTGAGTTGTGGGACATTTATGGTGAATTTCTTTTACAAT	30	A	C	lm	lm	ll	lm	ll	ll	ll	ll	ll	ll	lm	lm	ll	lm	lm	ll	lm	lm	ll	ll	lm	lm	ll	lm	lm	ll	lm	lm	--	ll	ll	ll	lm	ll	lm	lm	ll
63	922	10462	<lmxll>		6	43.659	1.126	RACA34	ACATCTGGAGATGTCACTTTAGGATGGTGGTTAAATATAAAAATGAGTGTT	23	A	T	ll	ll	lm	ll	lm	lm	lm	lm	lm	lm	ll	ll	lm	ll	lm	lm	ll	ll	lm	lm	ll	ll	lm	ll	ll	lm	ll	ll	--	--	lm	lm	ll	lm	ll	ll	lm
64	961	10872	<lmxll>		6	45.267	1.608	RACA34	ATCTCCAAATAAACAAGATTCTAGCTAATTTATTTGTGTGGGTGGGTATCA	32	T	A	lm	lm	ll	lm	ll	ll	ll	ll	ll	ll	lm	lm	ll	lm	--	ll	lm	lm	lm	ll	lm	lm	ll	lm	lm	ll	lm	lm	--	ll	ll	ll	lm	ll	lm	lm	ll
65	828	9396	<efxeg>		6	45.737	0.47	RACA34	GCCACCACTTGCAACCCCCCTAGAAAGAAATTCATCCTTGTTTAGACCAGT	36	C	T	ee	ee	--	ee	ef	ef	fg	fg	ef	fg	eg	ee	ef	ee	--	fg	eg	ee	ef	ef	eg	ee	ef	eg	eg	fg	eg	eg	fg	ef	ee	ef	eg	fg	ee	eg	fg
66	829	9397	<efxeg>		6	46.116	0.379	RACA34	TTTCTGATGAGTTTTGATCATCTGACTGATCTAAACAAGGATGAATTTCTT	28	A	G	ee	ee	ee	ee	ef	ef	fg	fg	ef	fg	eg	ee	ee	ee	ee	fg	eg	ee	ef	ef	eg	ee	--	eg	eg	fg	eg	eg	--	ef	ef	ef	eg	fg	ee	eg	fg
67	936	10587	<lmxll>		6	47.727	1.611	RACA34	ATTGTAATTGCATTCCCAGTGGTTTTTAATTATGATTAGACTGTTTTTGGC	38	G	C	ll	ll	--	ll	lm	lm	lm	lm	lm	lm	ll	ll	lm	ll	ll	lm	ll	ll	lm	lm	ll	ll	lm	ll	ll	lm	ll	ll	lm	--	lm	lm	ll	lm	ll	ll	lm
68	953	10809	<lmxll>		6	48.06	0.333	RACA34	CAAAACAAAATGAATGTTATCCTTTTTTGAACATTTTTCTATCAAATTGTT	42	C	A	lm	lm	--	lm	ll	ll	ll	ll	ll	ll	lm	lm	ll	lm	lm	ll	lm	lm	lm	ll	lm	lm	ll	lm	lm	ll	lm	--	ll	--	ll	ll	lm	ll	lm	lm	ll
69	960	10869	<lmxll>		6	48.197	0.137	RACA34	CCAGAAAGCAGTAAAAATGTAACAGGTTGCAGTTTTTTTTTTAAGTTGCTT	36	T	G	lm	lm	--	lm	ll	ll	ll	ll	ll	ll	lm	lm	ll	lm	lm	ll	lm	lm	lm	ll	lm	lm	ll	lm	lm	ll	lm	lm	ll	ll	ll	ll	lm	ll	lm	lm	ll
70	958	10859	<lmxll>		6	48.262	0.065	RACA34	TTAAAATACCACTGCTAATATGCAGGCCTGTCTGCTGAATGTGTGCATACA	44	G	A	lm	lm	ll	lm	ll	ll	ll	ll	ll	ll	lm	lm	ll	lm	lm	ll	lm	lm	lm	ll	lm	lm	ll	lm	lm	ll	lm	lm	ll	ll	ll	ll	lm	ll	lm	lm	ll
71	930	10530	<hkxhk>		6	48.516	0.254	RACA34	TCTACTGGAAGCTCAAGCTGCAACTGGTCACATAATTGACCCAAAAGCCAA	9	A	C	hk	hk	kk	hk	kk	kk	hk	--	kk	hk	hh	hk	kk	hk	hk	hk	hh	hk	kk	kk	hh	hk	kk	hh	hh	hk	hh	hh	hk	kk	kk	kk	hh	hk	hk	hh	hk
72	944	10688	<lmxll>		6	49.367	0.851	RACA34	TATTGGTAATAACATTTTCAACCGCTCAGCAAACCACTTAAAAGTCTAACA	23	G	A	lm	lm	ll	lm	ll	ll	ll	ll	ll	ll	lm	lm	ll	lm	lm	ll	lm	lm	ll	ll	lm	lm	ll	lm	lm	ll	lm	lm	ll	ll	ll	ll	lm	ll	lm	lm	ll
73	952	10799	<lmxll>		6	49.492	0.125	RACA34	TTGTGTGTGTGTGTGTTTGAGATGGAGTGTCGTCATGGCAACGAGCAGACA	11	T	C	ll	ll	lm	ll	lm	lm	lm	lm	lm	lm	ll	ll	lm	ll	ll	lm	ll	ll	lm	lm	ll	ll	lm	ll	ll	lm	ll	ll	lm	lm	lm	lm	ll	lm	ll	ll	lm
74	926	10476	<hkxhk>		6	49.748	0.256	RACA34	GTAAGCAGTCAGGGTGTTTTTAATAAAAGGTCAAAACCAATAATAAAACAC	13	G	C	kk	kk	--	kk	hk	hk	hk	hh	hh	hh	hk	kk	hk	kk	hk	hh	hk	kk	hk	hk	kk	kk	hk	hk	kk	hh	hk	hk	hh	--	hk	hk	hk	hh	kk	hk	hh
75	980	11084	<lmxll>		6	49.753	0.005	RACA34	TTCTCTTTACCCTCTTTTCTGTCCGGCATAACATTTAAAAATAAACCTAAA	23	C	A	ll	--	lm	ll	lm	lm	lm	lm	lm	lm	ll	ll	lm	ll	ll	lm	ll	ll	lm	lm	ll	ll	lm	ll	ll	lm	ll	ll	lm	lm	lm	lm	ll	lm	ll	ll	lm
76	928	10518	<lmxll>		6	49.783	0.03	RACA34	GTCGCTTTGCCATTGCTTTGACATTTGACAGATTATTTAACACAAGAAAGA	10	C	A	ll	ll	lm	ll	lm	lm	lm	lm	lm	lm	ll	ll	lm	ll	ll	lm	ll	ll	lm	lm	ll	ll	lm	ll	ll	lm	ll	ll	lm	lm	lm	lm	ll	lm	ll	ll	lm
77	992	11222	<lmxll>		6	50.417	0.634	RACA34	CAGCATCCCTCAACTTCTTAACCATGCTCTAATCTGCTGCACTGATCTATC	36	C	T	ll	ll	lm	ll	lm	lm	lm	lm	lm	lm	ll	ll	lm	ll	ll	lm	ll	ll	lm	lm	ll	ll	lm	ll	ll	lm	ll	ll	lm	lm	lm	lm	ll	lm	ll	ll	lm
78	852	9742	<hkxhk>		6	50.595	0.178	RACA34	NAATTCTGATCTGGTTTCATTGTTGGTCATTTCAAAATCATTTCTGAGAAG	37	T	C	hk	hk	hh	hk	hh	hh	hk	hk	hh	hk	kk	hk	hh	hk	hk	hk	kk	hk	hh	hh	kk	hk	hh	kk	kk	hk	kk	kk	hk	hh	hh	hh	kk	hk	hk	kk	hk
79	937	10602	<hkxhk>		6	51.103	0.508	RACA34	TTTACTGCTGTCATCAGAGGTCTACGTGTTTGTGTCCTTTTGTGTGATGAA	24	C	T	kk	kk	hk	kk	hk	hk	hk	hh	hh	hh	hk	kk	hk	kk	kk	hh	hk	kk	hk	hk	kk	kk	hk	hk	hk	hh	hk	hk	hh	hk	hk	hk	hk	hh	kk	hk	hh
80	919	10428	<nnxnp>		6	51.503	0.4	RACA34	GGTGTAAACTTGTCGTGCTAAAAAAATCAGATGATCATGATGATCACATAG	8	C	G	nn	--	nn	nn	nn	nn	np	nn	--	np	np	nn	--	nn	nn	np	np	nn	nn	nn	np	nn	nn	np	np	np	np	np	np	nn	nn	nn	np	np	nn	np	np
81	931	10564	<lmxll>		6	52.631	1.128	RACA34	TTGTTTACATTCTATTAAATTGGATTCATTTTTCCAAGAAGATTTGAGCTT	27	A	G	lm	lm	ll	lm	ll	ll	ll	ll	ll	ll	lm	lm	ll	lm	lm	ll	lm	lm	ll	ll	lm	lm	ll	lm	lm	ll	lm	lm	ll	ll	ll	ll	lm	ll	lm	lm	ll
82	921	10453	<lmxll>		6	53.504	0.873	RACA34	ATTTAAAATGCGTTAACACTGCTGTTTAGCAATAAATGGCCCAAACTAAAC	11	G	A	lm	lm	ll	lm	ll	ll	ll	ll	ll	lm	lm	lm	ll	lm	lm	ll	lm	lm	ll	ll	lm	lm	ll	lm	lm	ll	lm	lm	--	ll	ll	ll	lm	ll	lm	lm	ll
83	929	10524	<lmxll>		6	54.077	0.573	RACA34	AATTCAAGACTTGTTTGGCACATATACCAGATTAAATAATCCTTGATGATA	15	T	G	lm	lm	ll	lm	ll	ll	ll	ll	ll	ll	lm	lm	ll	lm	lm	ll	lm	lm	ll	ll	lm	lm	ll	lm	lm	ll	lm	--	ll	ll	ll	ll	lm	ll	lm	lm	ll
84	3897	47813	<hkxhk>		6	55.226	1.149	RACA35	GGCTGGGAGCTGCAGCAGCGACGCAAAGGGATGTGAATCCTCTGCACAATG	5	G	A	hk	hk	hh	hk	hh	hh	hh	hk	hk	hk	kk	hk	hh	hk	hk	hk	kk	hk	hh	hh	hk	hk	hh	kk	hk	hk	kk	kk	hk	hk	hh	hh	kk	hk	hk	kk	hk
85	3918	48126	<hkxhk>		6	55.412	0.186	RACA35	TTAATCGTGTGGTTTTGTTGTCAACTTTGGTTTGTCCGGTAGATGGGAGTA	5	C	T	hk	hk	--	hk	kk	kk	--	hk	hk	hk	hh	hk	kk	hk	hk	hk	hh	hk	kk	kk	hk	hk	kk	hh	hk	hk	hh	hh	--	hk	kk	kk	hh	hk	hk	hh	hk
86	955	10832	<nnxnp>		6	55.478	0.066	RACA34	TTCAATGTTCTCTCTTAGAATATTGCGTGAGGGACTCTGCAAGAATTGCCT	9	T	C	nn	nn	nn	nn	nn	nn	nn	np	--	np	np	nn	nn	nn	nn	np	np	nn	nn	nn	np	nn	nn	np	np	np	np	np	--	nn	nn	nn	np	np	nn	np	np
87	839	9511	<nnxnp>		6	55.624	0.146	RACA34	GGACACAAACAGGACAAAAAACAACAAAGTAAAACACTTGTGACCAATAAA	13	G	A	nn	nn	nn	nn	nn	nn	nn	np	nn	np	np	nn	nn	nn	--	np	np	nn	nn	nn	np	nn	nn	np	np	np	np	np	np	nn	nn	nn	np	np	nn	np	np
88	3911	48003	<hkxhk>		6	56.443	0.819	RACA35	TCCTTGTTTGCTTATTAAAGCCTCAGTTTTGCCTTAGGGTGTACATTTGAA	11	T	C	hk	hk	hh	hk	hh	hh	hh	hk	hk	hk	kk	hk	hh	hk	hk	hk	kk	hk	hh	hh	hk	hk	hh	kk	hk	hk	kk	kk	hk	hk	hh	hh	kk	hk	hk	kk	hk
89	833	9452	<nnxnp>		6	56.696	0.253	RACA34	NAATTCCAGCCACGCAGAAAGCCCAGTTATCAATTCCTCCTCCATGATCAA	20	C	G	nn	nn	--	nn	nn	nn	nn	np	nn	np	np	nn	nn	nn	nn	np	np	nn	nn	nn	np	nn	--	np	np	np	np	np	np	--	nn	nn	np	np	nn	np	np
90	3908	47951	<hkxhk>		6	57.213	0.517	RACA35	CCCACGACCATTTTTAATCCTCCCTAAAACCCTCATAGCACTATTTATTTC	5	G	A	hk	hk	kk	hk	kk	kk	kk	hk	hk	hk	hh	hk	kk	hk	hk	hk	hh	hk	kk	kk	hk	hk	kk	hh	hk	hk	hh	hh	hk	hk	kk	kk	hh	hk	hk	hh	hk
91	3916	48095	<hkxhk>		6	57.412	0.199	RACA35	TCAGAAAAGAAAAACAAAAGACAGTCGTAATGAACAACAGCTGCACGAGTT	36	A	G	hk	hk	kk	hk	kk	kk	kk	hk	hk	hk	hh	hk	kk	hk	hk	hk	hh	hk	kk	kk	hk	hk	kk	hh	hk	hk	hh	hh	hk	hk	kk	kk	hh	hk	hk	hh	hk
92	3878	47505	<lmxll>		6	57.414	0.002	RACA35	GAATCCCTCTGCTTGGAGGGTGGGATCTTCAAAAAAATATTTTGGACACCA	36	A	G	ll	ll	lm	ll	lm	lm	lm	lm	lm	lm	ll	ll	lm	ll	ll	lm	ll	ll	lm	lm	ll	ll	lm	ll	ll	lm	ll	ll	lm	lm	lm	lm	ll	lm	ll	ll	lm
93	3879	47522	<lmxll>		6	58.597	1.183	RACA35	NAATTCTCCTGCTTCGGAGTTTAGAACATCTGCATAGAAAATGGTGACTTT	15	G	C	ll	ll	--	ll	lm	lm	lm	lm	lm	lm	ll	ll	lm	--	ll	lm	ll	ll	lm	lm	ll	ll	lm	ll	ll	lm	ll	ll	--	lm	lm	lm	ll	lm	ll	ll	lm
94	3906	47945	<lmxll>		6	59.076	0.479	RACA35	CGCCACCAGCATGGTGTTAAGGCATGAGCTCACACACACATGGACGAGAAG	45	G	A	--	--	lm	ll	lm	lm	lm	lm	lm	lm	ll	ll	lm	ll	ll	lm	ll	ll	lm	lm	ll	ll	lm	ll	ll	lm	ll	ll	lm	lm	lm	lm	ll	lm	ll	ll	lm
95	3885	47669	<lmxll>		6	59.892	0.816	RACA35	GCTCTGATTGGCCTTCCCCTGGTTGCTCTCCTCCGAACATTTCTTTCTCAT	41	T	G	ll	ll	lm	ll	lm	lm	lm	lm	lm	lm	ll	ll	lm	ll	ll	lm	ll	ll	lm	lm	ll	ll	lm	ll	ll	lm	ll	ll	lm	lm	lm	lm	ll	lm	ll	ll	lm
96	3896	47807	<hkxhk>		6	60.531	0.639	RACA35	TTCAGTCTCTCTGGGTTCTGTGTACTTCACTCTTGCAGTGAGAGCTGCACT	18	T	A	hk	hk	--	hk	hh	hh	hh	hk	hk	hk	kk	hk	hh	hk	kk	hk	kk	hk	hh	hh	hk	hk	hh	kk	hk	hk	kk	kk	hk	hk	hh	hh	kk	hk	hk	kk	hk
97	3884	47612	<lmxll>		6	60.731	0.2	RACA35	CCTTACAGTTATCGTCTCCATCAGTCCTAATATCTGTTTCTGTACCAGTGG	4	A	G	ll	ll	--	ll	lm	lm	lm	lm	lm	lm	ll	ll	lm	ll	ll	--	ll	ll	lm	lm	ll	ll	lm	ll	ll	lm	ll	ll	--	lm	lm	lm	ll	lm	ll	ll	lm
98	915	10378	<nnxnp>		6	61.853	1.122	RACA34	GACATTTCACACAGTAATGGAAAAAGTCACAAGACATTTCTTATGCTTTTA	18	A	G	nn	nn	nn	nn	nn	nn	nn	np	np	np	np	nn	nn	nn	nn	np	np	nn	nn	nn	nn	nn	nn	np	nn	np	np	np	np	np	nn	nn	np	np	nn	np	np
99	3887	47700	<hkxhk>		6	62.581	0.728	RACA35	CAGCCCGTCGGTCTTCCTGCGGCGTGGTACCGTCCACAGCTCCCGCGTCAC	22	C	A	hk	hk	kk	hk	kk	kk	kk	hk	hk	hk	hh	hk	kk	hk	hh	hk	hh	hk	kk	kk	hk	hk	kk	hh	hk	hk	hh	hh	hk	hk	kk	kk	hh	hk	hk	hh	hk
100	3900	47829	<lmxll>		6	62.645	0.064	RACA35	GCTCACACTGAGCGGTTACATGAGCAGGTCAATGTCTGAAGAGGCAGTTGG	17	A	T	ll	--	--	ll	lm	lm	lm	lm	lm	lm	ll	ll	lm	ll	ll	lm	ll	ll	lm	lm	ll	ll	lm	ll	ll	lm	ll	ll	lm	lm	lm	lm	ll	lm	ll	ll	lm
101	3876	47489	<lmxll>		6	62.686	0.041	RACA35	GAAACTCATGTCTGAGAACGTTGTTGCAAAATTGATCAGGCCTGGAGGCAC	16	A	G	ll	ll	lm	ll	lm	lm	lm	lm	lm	lm	ll	ll	lm	ll	ll	lm	ll	ll	lm	lm	ll	ll	lm	ll	ll	lm	ll	ll	lm	lm	lm	lm	ll	lm	ll	ll	lm
102	3898	47816	<hkxhk>		6	63.005	0.319	RACA35	AAAGACCTGTCCTGGTATACGCTCATATTTGTTGGCAGGAAGAACCTCATT	18	A	G	hk	hk	hh	hk	hh	hh	hh	hk	hk	hk	kk	hk	hh	hk	hk	hk	kk	hk	hh	hh	hk	hk	hh	kk	hk	hk	kk	kk	hk	hk	hh	hh	kk	hk	hk	kk	hk
103	914	10377	<nnxnp>		6	63.737	0.732	RACA34	TTCAGTTGCAACTGAAGGTGTACAACTACATTGTGTGATTGATATCTAAAC	28	T	C	nn	nn	nn	nn	nn	nn	--	np	np	np	np	nn	nn	nn	nn	np	np	nn	nn	nn	nn	nn	nn	np	nn	np	np	np	np	np	nn	nn	np	np	nn	np	np
104	3882	47578	<lmxll>		6	65.365	1.628	RACA35	GCGTAAAATGCAGAACTGGGATGTTAATGGGAAGCTTTGAGGACACGTGTG	18	G	A	ll	ll	lm	ll	lm	lm	lm	lm	lm	lm	ll	ll	lm	ll	ll	lm	ll	ll	lm	lm	ll	ll	lm	ll	ll	lm	ll	ll	lm	lm	lm	lm	ll	lm	ll	ll	lm
105	3894	47798	<nnxnp>		6	66.724	1.359	RACA35	TAAACAATTGTAATAAATGGGAAAGTTTCTTTTTTTCCTTTTTTAATTCTT	28	A	C	np	np	np	np	np	np	np	nn	nn	nn	nn	np	np	np	nn	nn	nn	np	np	np	np	np	np	nn	np	nn	nn	nn	nn	nn	np	np	nn	nn	np	nn	nn
106	3919	48152	<hkxhk>		6	66.958	0.234	RACA35	GTGGATCACCAGAGCACTGCAATTGTATTTAGAATAACAGATGCTGGTGAA	16	C	A	hk	hk	hh	hk	hh	hh	hh	hk	hk	hk	kk	hk	hh	hk	kk	hk	kk	hk	hh	hh	hk	hk	hh	kk	hk	hk	kk	kk	hk	hk	hh	hh	kk	hk	hk	kk	hk
107	3934	48345	<hkxhk>		6	68.062	1.104	RACA35	GAATTCTAGGAACTACAAGCAGTCCTGTATTTTATCAGCAGTCACATTCAG	39	A	G	hk	hk	kk	hk	kk	kk	kk	hk	hk	hk	hh	hk	kk	hk	hh	hk	hh	hk	kk	kk	hk	hk	kk	hh	hk	hk	hh	hh	hk	hk	kk	kk	hh	hk	hk	hh	hk
108	3912	48022	<hkxhk>		6	68.313	0.251	RACA35	GACCCTTCTAACCTGTAGGATCCACAGCTGGCTCTGAAAACACCTCTGGAC	26	G	A	hk	hk	kk	hk	kk	kk	kk	hk	hk	hk	hh	hk	kk	hk	hk	hk	hh	hk	kk	kk	hk	hk	kk	hh	hk	hk	hh	hh	hk	hk	kk	kk	hh	hk	hk	hh	hk
1	3964	48607	<nnxnp>		7	0		RACA39	CTTTTTGCCGAGGGCACCATGCAGCCGTACATAATGACAGCAAACACTGTT	7	C	G	np	nn	nn	np	nn	np	nn	np	nn	nn	nn	nn	np	nn	nn	nn	nn	np	np	np	np	nn	nn	np	nn	nn	np	np	nn	np	nn	nn	np	nn	nn	nn	np
2	3960	48582	<nnxnp>		7	1.09	1.09	RACA39	CATTAGAGTTTTACAAATGGAACGAGCTTTGGACTAAGTGCTGTACATTTT	3	T	C	np	nn	nn	np	nn	np	nn	np	nn	nn	nn	np	np	nn	nn	nn	nn	np	np	np	np	nn	nn	np	nn	nn	np	np	nn	np	nn	nn	np	nn	nn	nn	np
3	3968	48633	<nnxnp>		7	2.125	1.035	RACA39	GTGTTTGGAGCAAGTTATGCATCGTTTTGTCCATCTTCCAGCTCTTTAGTG	36	C	T	nn	np	--	nn	np	nn	np	nn	np	np	np	np	nn	np	np	np	np	nn	nn	nn	nn	np	np	nn	np	np	nn	nn	np	nn	np	np	nn	np	np	np	nn
4	3989	48850	<nnxnp>		7	3.32	1.195	RACA39	GTGTCAATCTAATGTCTCAGATATTCAATCTGCGTAAAAAAGACTTTAAGT	6	A	G	nn	np	np	nn	np	nn	np	nn	np	np	np	np	nn	np	np	np	np	nn	nn	nn	nn	np	np	nn	np	np	nn	nn	np	nn	np	np	nn	np	np	np	nn
5	3957	48548	<nnxnp>		7	5.143	1.823	RACA39	ATAGAATGTGCTTGTGTACCATTTGATAAATACAGCCTTCTTAAAGTAATA	20	A	G	np	nn	nn	np	nn	np	nn	np	nn	nn	nn	np	--	nn	nn	--	nn	np	np	np	np	nn	nn	np	nn	nn	np	np	nn	np	nn	nn	np	nn	nn	nn	np
6	3986	48798	<nnxnp>	3986	7	6.016	0.873	RACA39	TCAGGTGATAACTGCCTGTTATGACAAGAAAACAATGACATTTATCACAAT	5	T	C	np	nn	nn	np	nn	np	nn	np	nn	nn	nn	nn	np	nn	nn	nn	nn	np	np	np	np	nn	nn	np	nn	nn	np	np	nn	np	nn	nn	np	nn	nn	nn	np
7	3987	48806	<nnxnp>	3986	7	6.016	0	RACA39	CTAATACAGTCATTGTTTCTGGAGCTCTACATTTTAAAGGTTGTTTGATAC	20	G	A	np	nn	nn	np	nn	np	nn	np	nn	nn	nn	nn	np	nn	nn	nn	nn	np	np	np	np	nn	nn	np	nn	nn	np	np	nn	np	nn	nn	np	nn	nn	nn	np
8	3944	48452	<lmxll>		7	6.639	0.623	RACA39	TAGGCTCTCAGACATTACCCAGAAGGCCCTTGGTCCAAAGGTAAAGGATGG	37	A	T	ll	lm	lm	lm	lm	lm	lm	ll	ll	lm	ll	lm	ll	ll	ll	ll	ll	ll	lm	lm	lm	lm	lm	ll	lm	lm	lm	ll	lm	ll	lm	lm	ll	ll	lm	ll	ll
9	5244	66112	<nnxnp>		7	7.084	0.445	sc00218	GGTGAATCCTCCTCCAGGATTTTTCTTTCGCAGCTCTATTCCGAAATATGA	41	C	T	nn	np	np	nn	np	nn	np	nn	np	np	--	np	nn	np	np	np	np	nn	nn	nn	nn	np	np	nn	np	np	nn	nn	np	nn	np	np	--	np	np	np	nn
10	3941	48437	<hkxhk>		7	7.147	0.063	RACA39	CCCCAGAGCGGATCAATAATATTGAAGTCAGGAGACTGAGATGACCACTCC	8	C	T	hh	kk	kk	hk	kk	hk	kk	hh	hk	kk	hk	hk	hh	hk	hk	hk	hk	hh	hk	hk	hk	kk	kk	hh	--	kk	hk	hh	kk	hh	kk	kk	hh	hk	--	hk	hh
11	3979	48728	<nnxnp>	3979	7	7.243	0.096	RACA39	GTGATTGACAGTGAAAATGATATTAGCTTGAGGTAACAAAAGAATATCTTT	17	T	A	nn	np	np	nn	np	nn	np	nn	np	np	np	np	nn	np	np	np	np	nn	nn	nn	nn	np	np	nn	np	np	nn	nn	np	nn	np	np	nn	np	np	np	nn
12	5245	66161	<nnxnp>	3979	7	7.243	0	sc00218	ATAGCTGTTTGGGTTGCCAGTCCCAAATGAAGATTTAATGATCAGCTGAGA	37	A	G	nn	np	np	nn	np	nn	np	nn	np	np	np	np	nn	np	np	np	np	nn	nn	nn	nn	np	np	nn	np	np	nn	nn	np	nn	np	np	nn	np	np	np	nn
13	3973	48689	<nnxnp>		7	8.444	1.201	RACA39	GTGTCAATCGCTGCATTTCTGACCTGGTTTGTGGTTTTTACATGAATAGAT	5	C	A	nn	np	np	nn	np	nn	np	nn	np	np	np	np	nn	np	np	np	np	nn	nn	nn	nn	np	np	nn	np	np	nn	nn	np	nn	np	np	nn	np	np	np	nn
14	3975	48694	<nnxnp>		7	8.459	0.015	RACA39	TCTTGATTTTGTTTCCAGTGTGACTCAGACATCCAGACTCAACCAGAGGCT	46	A	G	nn	np	np	nn	np	nn	np	nn	np	np	np	np	nn	np	np	np	np	nn	nn	--	nn	np	np	--	np	np	nn	nn	np	nn	np	np	nn	np	np	np	nn
15	3961	48595	<nnxnp>		7	8.986	0.527	RACA39	TTATTTTACATATGAAGGTCCACATTACCAAAACTGAACAATGGAAAGTCA	28	G	C	nn	np	--	nn	np	nn	np	nn	np	np	np	np	nn	np	np	np	np	nn	nn	--	nn	np	np	nn	np	np	nn	nn	--	nn	np	np	nn	np	np	np	nn
16	2605	31801	<lmxll>	2605	7	9.448	0.462	RACA1	NAATTCCTATTTCTAGTACTCATTTCTGTGGGTAGGATTGGGTATATTTGG	39	G	T	ll	lm	lm	lm	lm	lm	lm	ll	ll	lm	ll	lm	ll	ll	ll	ll	ll	ll	lm	lm	lm	lm	lm	ll	lm	lm	lm	ll	lm	ll	lm	lm	ll	ll	lm	ll	ll
17	3978	48717	<lmxll>	2605	7	9.448	0	RACA39	GACCTGGAGACTCTTGGCTCTTAACAGAAGGAGAAGACTTTGCCCTCATTA	23	A	G	ll	lm	lm	lm	lm	lm	lm	ll	ll	lm	ll	lm	ll	ll	ll	ll	ll	ll	lm	lm	lm	lm	lm	ll	lm	lm	lm	ll	lm	ll	lm	lm	ll	ll	lm	ll	ll
18	3948	48496	<nnxnp>		7	10.071	0.623	RACA39	CATAAAGAATCAATCGCAGGACTACATATCTCTATATATCGCAATATTGAT	31	C	T	nn	np	np	nn	np	nn	np	nn	np	np	np	nn	nn	np	np	np	np	nn	nn	nn	nn	np	np	nn	np	np	nn	nn	np	nn	np	np	nn	np	np	np	nn
19	3958	48574	<nnxnp>		7	10.108	0.037	RACA39	CCACTAGCTACACAGAACAACAGAGCAAGTCATTGCAGCCATCAGTTATCA	22	G	T	nn	np	np	nn	np	nn	np	nn	np	np	np	nn	nn	np	np	np	np	nn	nn	nn	nn	np	np	nn	np	np	nn	nn	np	nn	np	np	nn	np	np	np	nn
20	3981	48743	<lmxll>	3981	7	10.56	0.452	RACA39	TCACCTGAGTCTCTGTCAGGTTGAGGGAGCTGGAGAACTCGGCTCTCTCGG	13	T	C	ll	lm	lm	lm	lm	lm	lm	ll	ll	lm	ll	lm	ll	ll	ll	ll	ll	ll	lm	lm	lm	lm	lm	ll	lm	lm	lm	ll	lm	ll	lm	lm	ll	ll	lm	ll	ll
21	5495	71257	<lmxll>	3981	7	10.56	0	sc01635	CTTCAATCATTGGACAGTGACTGTGACGGAGGCACAAAGCAACGGGAGAAA	17	T	G	ll	lm	lm	lm	lm	lm	lm	ll	ll	lm	ll	lm	ll	ll	ll	ll	ll	ll	lm	lm	lm	lm	lm	ll	lm	lm	lm	ll	lm	ll	lm	lm	ll	ll	lm	ll	ll
22	3991	48902	<lmxll>		7	11.889	1.329	RACA39	CAGTGAAGTGTTAATCTTTCTTGTTCAGGATCAATTAAGCCTGGAATTNNN	33	A	C	lm	ll	ll	ll	ll	ll	ll	lm	lm	ll	lm	ll	lm	lm	lm	lm	lm	lm	ll	ll	ll	ll	ll	lm	ll	ll	ll	lm	--	ll	ll	ll	lm	lm	ll	lm	lm
23	2604	31800	<hkxhk>		7	12.077	0.188	RACA1	GATTCACTGACCTGAGATCAATCCAGGACATCTTCATCCTAAACTTCCACC	34	C	T	hk	hk	hk	kk	hk	kk	hk	hk	hh	hk	hh	kk	hk	hh	hh	hh	hh	hk	kk	kk	kk	hk	hk	hk	hk	hk	kk	hk	hk	hk	hk	hk	hk	hh	hk	hh	hk
24	4047	49785	<nnxnp>		7	12.668	0.591	RACA39	TCACGGCCGAACTGAACTGGACAGAAGCTCGGCTGCAGTGTTTGAACCGTG	37	A	G	np	nn	nn	np	nn	np	nn	np	nn	nn	nn	np	np	nn	nn	nn	nn	np	np	np	np	nn	nn	np	nn	nn	np	np	nn	np	nn	np	np	nn	nn	nn	np
25	3985	48777	<lmxll>		7	13.1	0.432	RACA39	TCATAGAAAAAAATATAACTAAAATATTTCAAAAACTAGATATAGAATTAC	14	A	C	lm	ll	--	ll	--	ll	ll	lm	lm	--	lm	ll	lm	lm	lm	lm	lm	lm	ll	ll	ll	ll	ll	lm	ll	ll	ll	lm	--	lm	ll	ll	lm	lm	ll	lm	lm
26	3967	48624	<lmxll>		7	13.559	0.459	RACA39	AGGATTCTTTAATAACAAAAGTTAAAACTCACTGTAGTCGGCAAAACTCCA	27	C	G	lm	ll	ll	ll	ll	ll	ll	lm	lm	ll	lm	ll	lm	lm	lm	lm	lm	lm	ll	ll	ll	ll	ll	lm	ll	ll	ll	lm	ll	lm	ll	ll	lm	lm	ll	lm	lm
27	2608	31816	<hkxhk>		7	13.751	0.192	RACA1	AATTGTCAAAACTGTAATAAGAACATAAATAACAAATCTGTAAATAAATGG	6	C	G	hk	hk	hk	hh	hk	--	hk	hk	kk	hk	kk	hh	hk	kk	kk	kk	kk	hk	--	hh	hh	hk	hk	hk	hk	hk	hh	hk	hk	hk	hk	hk	hk	kk	hk	kk	hk
28	3936	48388	<lmxll>		7	13.752	0.001	RACA39	TTACTTTTATGCCATTTTATATAAAAACAATAAATGTATAAATATACCAAA	27	C	A	lm	ll	ll	ll	ll	ll	ll	lm	lm	ll	lm	ll	lm	lm	lm	lm	lm	lm	ll	ll	ll	ll	ll	lm	ll	ll	--	lm	--	lm	ll	ll	lm	lm	ll	lm	lm
29	4032	49529	<nnxnp>		7	13.996	0.244	RACA39	CTTCAGACCAGCTCACCTTTCACAAAAAAATATGAAAATGGAGTTAAACAT	31	G	A	nn	np	np	nn	np	nn	np	nn	np	np	np	nn	nn	np	np	np	np	nn	nn	nn	nn	np	nn	nn	np	np	nn	nn	np	nn	np	nn	nn	np	np	np	nn
30	4961	61771	<lmxll>		7	14.052	0.056	RACA33	AATTCTAAAATGAAATGTTAACGTCCAGCAGGATGACATGAATACTAGAAT	28	C	T	lm	ll	ll	ll	ll	ll	ll	lm	lm	ll	lm	ll	lm	lm	lm	lm	lm	lm	ll	ll	ll	ll	ll	lm	ll	ll	ll	lm	ll	lm	ll	ll	lm	lm	ll	lm	lm
31	3942	48440	<lmxll>		7	15.851	1.799	RACA39	GTCCAACGATTAGCTGCCTCTGGTTCCTGCGAATGTTTGTTCTTGTCCTTC	37	T	C	lm	ll	ll	ll	ll	ll	ll	lm	lm	ll	lm	ll	lm	lm	lm	lm	lm	lm	ll	ll	ll	ll	--	lm	--	ll	ll	lm	ll	lm	ll	ll	lm	lm	--	lm	lm
32	3953	48525	<hkxhk>		7	16.255	0.404	RACA39	TTTTCATTCTTAAACCTTGACTTTTCATTCCTTTAAGGCTTAAATTTTTAG	27	T	A	hh	kk	kk	hk	kk	hk	kk	hh	hk	kk	hk	hk	hh	hk	hk	hk	hk	hh	hk	hk	hk	kk	kk	hh	kk	kk	hk	hh	hk	hh	kk	kk	--	hk	kk	hk	hh
33	3955	48528	<hkxhk>		7	16.554	0.299	RACA39	ATGTGGAGATTGAACGCGCCAGACTAACAAAGACTCTGGCAAACATCAAGG	16	C	T	hh	kk	kk	hk	kk	hk	kk	hh	hk	kk	hk	hk	hh	hk	hk	hk	hk	hh	hk	hk	hk	kk	kk	hh	kk	kk	hk	hh	kk	hh	kk	kk	hh	hk	kk	hk	hh
34	4053	49862	<lmxll>		7	16.767	0.213	RACA39	TGTTTATGTGTGCTGCTTTATTCTGAGCCATTTATATTAATTAATAATTAT	19	A	T	lm	ll	ll	ll	ll	ll	ll	lm	lm	ll	lm	ll	lm	lm	lm	lm	lm	lm	ll	ll	ll	ll	ll	lm	ll	ll	ll	lm	ll	lm	ll	ll	lm	lm	ll	lm	lm
35	4046	49781	<lmxll>		7	16.784	0.017	RACA39	TACTGCAGGTTTTTCTTTTTGTTTCACATATATCTGGCTGCACTGAGTCCT	31	A	C	lm	ll	--	ll	ll	ll	ll	lm	lm	ll	lm	ll	lm	lm	lm	lm	lm	lm	ll	ll	ll	ll	ll	lm	ll	ll	ll	lm	ll	lm	ll	ll	lm	lm	ll	lm	lm
36	4024	49424	<hkxhk>		7	17.65	0.866	RACA39	CAAAGCTGATCCTTGGAGTTGTCCCACCCACACTTCACTGTCACACTTATA	14	G	T	hk	hk	hh	kk	hk	hk	hk	hk	hh	hk	hh	kk	hk	hh	hk	hh	hh	hk	kk	kk	kk	hk	kk	--	hk	hk	--	hk	hk	hk	hk	kk	hk	hh	hk	hh	hk
37	4023	49416	<hkxhk>		7	18.191	0.541	RACA39	GAGCCTCTATCGCTCTGTTGCTCGGGGTTTGTTCCTGTGCTGCCAGGATCA	17	T	C	hk	hk	--	kk	hk	kk	hk	hk	hh	hk	hh	hk	hk	hh	hk	--	hh	hk	kk	kk	kk	hk	kk	hk	hk	hk	kk	hk	hk	hk	hk	kk	hk	hh	hk	hh	hk
38	4020	49402	<efxeg>		7	19.257	1.066	RACA39	CTCCAAGCTGTCTGGACATTAGTTGGATGATCAGCGTTTGCTCGGCAGCTC	11	C	T	ef	eg	--	ee	eg	ee	eg	ef	fg	eg	fg	ee	ef	fg	ee	fg	fg	ef	ee	ee	ee	eg	ee	ef	eg	eg	ee	ef	eg	ef	eg	ee	ef	fg	--	fg	ef
39	4017	49372	<lmxll>		7	19.882	0.625	RACA39	GGCAGAGATTATGAAGTGTGGTCGATCGTCCAGCTCCGGCAGGTCCACGGA	20	G	A	lm	ll	--	ll	ll	ll	ll	lm	lm	ll	lm	ll	lm	lm	ll	lm	lm	lm	ll	ll	ll	ll	ll	lm	ll	ll	ll	lm	--	lm	ll	ll	lm	lm	ll	lm	lm
40	4021	49405	<hkxhk>		7	20.065	0.183	RACA39	CTATTAGTTGCCATCTACCATATGTCTATTAGCTAACTAATATATATCTAC	19	A	G	--	hk	--	hh	hk	hh	hk	hk	kk	hk	kk	hh	hk	kk	hh	kk	kk	hk	hh	hh	hh	hk	hh	hk	hk	hk	hh	hk	--	hk	hk	hh	hk	kk	hk	kk	hk
41	4026	49449	<lmxll>		7	20.402	0.337	RACA39	CAAACACTTCACAAAAGGCACCGAAATCAGGCGCGACAGTTAAATCTTTAG	32	G	C	lm	ll	ll	ll	ll	ll	ll	lm	lm	ll	lm	ll	lm	lm	ll	lm	lm	lm	ll	ll	ll	ll	ll	lm	ll	ll	ll	--	lm	--	--	ll	lm	lm	ll	lm	lm
42	4008	49239	<lmxll>		7	21.322	0.92	RACA39	GTACAATTACAGATATCTTTATGCTTGCCTGATAGTAAGACCTCTTAAAAA	33	A	T	lm	--	ll	ll	ll	ll	ll	lm	lm	ll	lm	ll	lm	lm	ll	lm	lm	lm	ll	ll	ll	ll	ll	lm	ll	ll	ll	lm	ll	lm	ll	ll	lm	lm	ll	--	lm
43	4015	49344	<hkxhk>		7	21.664	0.342	RACA39	TGAAAAAATAAACCGTCTAATTTGGCATAAAATCCTTTAACTTTGACACAA	8	T	G	hk	hk	hk	kk	hk	kk	hk	hh	hh	hk	hh	kk	hk	hh	kk	hh	hh	hk	kk	kk	kk	hk	kk	hk	hk	kk	kk	hk	hk	hk	hk	kk	hk	hh	hk	hh	hk
44	4016	49351	<hkxhk>		7	22.008	0.344	RACA39	GGCTCCGGACGACTTTAACTGGGGAAAGCCACCGCTCAACATTTATTACAC	6	G	A	hk	hk	hk	hh	hk	hh	hk	kk	kk	hk	kk	hh	hk	kk	hh	kk	kk	hk	hh	hh	hh	hk	hh	hk	hk	hh	hh	hk	hk	hk	hk	hh	hk	kk	hk	kk	hk
45	4007	49222	<lmxll>		7	22.504	0.496	RACA39	ACAGTAATAAATATAAAAGTCATAACTCAATACCTCCGTACAAAGTAACAA	46	A	G	lm	lm	ll	ll	ll	ll	ll	lm	lm	ll	lm	ll	lm	lm	ll	lm	lm	lm	ll	ll	ll	ll	ll	lm	ll	ll	ll	lm	ll	lm	ll	ll	lm	lm	ll	lm	lm
46	4014	49308	<hkxhk>		7	23.531	1.027	RACA39	ATGTATGTCTTCGTTTTCCTCGCCTGAGCTGCCATATCTGGCTAGATAGGT	43	A	G	hk	hk	--	hh	hk	hh	hk	kk	kk	hk	kk	hh	hk	kk	hh	kk	kk	hk	hh	hh	hh	hk	hh	hk	hk	hh	hh	hk	hk	hk	hk	hh	hk	kk	hk	kk	hk
47	4013	49302	<hkxhk>		7	24.386	0.855	RACA39	ACAATTCAGATTCTTTGAAGTGAGCAGAAAACCACACTAAAGCAGGGGCAG	25	A	C	hk	hh	hk	kk	hk	kk	hk	hh	hh	hk	hh	kk	hk	hh	kk	hh	hh	hk	kk	kk	kk	hk	kk	hk	hk	kk	kk	hk	hk	hk	hk	kk	hk	hh	hk	hh	hk
48	4012	49276	<hkxhk>		7	25.124	0.738	RACA39	CCAGCTCGGAGAAAAAGTCCAAGCAAGACAGGTGTCGTGCATGTGTATCTC	13	A	G	hk	hh	--	kk	hk	kk	hk	hh	hk	hk	hh	kk	hk	hh	kk	hh	hh	hk	kk	kk	kk	hk	kk	hk	hk	kk	kk	hk	--	hk	hk	kk	hk	hh	hk	hh	hk
49	4011	49262	<hkxhk>		7	25.598	0.474	RACA39	CATCTGTTTTTAGTTACATTTTTATAATTGAAAATTAAGAGTATTGTACTA	16	C	T	hk	kk	hk	hh	hk	hh	hk	kk	hk	hk	kk	hh	hk	kk	hh	kk	kk	hk	hh	hh	hh	hk	hh	hk	hk	hh	hh	hk	hk	hk	hk	hh	hk	kk	hk	kk	hk
50	4009	49250	<hkxhk>		7	25.852	0.254	RACA39	GCAGCCAATCCTCACACCCAGATATAGGCGTGTTTTCATGCAGGGAGGAGN	44	G	A	hk	--	hk	hh	hk	hh	hk	kk	hk	hk	kk	hh	hk	kk	hh	kk	kk	hk	hh	hh	hh	hk	hh	hk	hk	hh	hh	hk	hk	hk	hk	hh	hk	kk	hk	kk	hk
51	2373	29062	<lmxll>		7	26.368	0.516	RACA40	CTTGTTGTAATGTAAGCATAATGTTAAAACCCTAGAAGGTAACAGCAGAGT	15	G	A	lm	lm	ll	ll	ll	ll	ll	lm	lm	ll	lm	ll	lm	lm	ll	lm	lm	lm	ll	ll	ll	ll	ll	lm	ll	ll	ll	ll	--	lm	ll	ll	lm	ll	ll	lm	lm
52	4002	49092	<lmxll>		7	28.223	1.855	RACA39	GATGCATGCATTTGTTGGATCTCTCACCAAACGACATTCTAATAAGCGGCG	36	T	C	lm	lm	ll	ll	ll	ll	ll	lm	lm	ll	lm	ll	lm	lm	ll	lm	lm	lm	ll	ll	ll	ll	ll	lm	ll	ll	ll	ll	ll	lm	ll	ll	lm	ll	ll	lm	lm
53	2367	28972	<lmxll>		7	28.787	0.564	RACA40	AGGTCGGCCTCGTTACGAATCAAAGCAAAAACAAACACAAAATAGAATGGA	7	C	T	ll	ll	lm	lm	lm	lm	lm	ll	ll	lm	ll	lm	ll	ll	lm	ll	ll	ll	lm	lm	lm	lm	lm	ll	lm	lm	lm	lm	lm	ll	lm	lm	ll	lm	lm	ll	ll
54	2365	28953	<lmxll>		7	29.993	1.206	RACA40	NAATTCTTCTTCTTACCTGTATTTGGACAGGTGTTCCTATTATTCTTTGTC	12	T	C	lm	lm	--	ll	ll	ll	ll	lm	lm	ll	lm	ll	lm	lm	ll	lm	lm	lm	ll	ll	ll	ll	ll	lm	ll	ll	ll	ll	ll	--	ll	ll	lm	ll	ll	lm	lm
55	4000	49049	<hkxhk>		7	30.212	0.219	RACA39	CAGGAAAATAAGAACCAAGTGTATGAGCAAACAGGAAGAATAGTGTCTTAC	23	T	C	hk	kk	hk	hh	hk	hk	hk	kk	hk	hk	kk	hh	hk	kk	hh	kk	kk	hk	hh	hh	hh	hk	hh	hk	hk	hh	hh	hh	hk	hk	hk	hh	hk	hk	hk	kk	hk
56	2364	28951	<lmxll>		7	30.473	0.261	RACA40	CGCTAATAAAAACATCCTTAAATTTAATAAGCATTTGAAACATTTTCAAGC	42	T	C	lm	lm	ll	ll	ll	ll	ll	lm	lm	ll	lm	ll	lm	lm	ll	lm	lm	lm	ll	ll	ll	ll	ll	lm	ll	ll	ll	ll	ll	lm	ll	ll	lm	ll	ll	lm	lm
57	2379	29154	<lmxll>	2379	7	30.575	0.102	RACA40	CCTTTATCATCAGAGTCTGGCATCACATGAGAGAATACAGGAAATATGAAT	7	C	T	lm	lm	ll	ll	ll	ll	ll	lm	lm	ll	lm	ll	lm	lm	ll	lm	lm	lm	ll	ll	ll	ll	ll	lm	ll	ll	ll	ll	ll	lm	ll	ll	lm	ll	ll	lm	lm
58	2381	29171	<lmxll>	2379	7	30.575	0	RACA40	ACTGTGTATGATTTTTAATAAACCTCTCTGGAATGAGACTTTCCAGTGCTT	39	T	A	lm	lm	ll	ll	ll	ll	ll	lm	lm	ll	lm	ll	lm	lm	ll	lm	lm	lm	ll	ll	ll	ll	ll	lm	ll	ll	ll	ll	ll	lm	ll	ll	lm	ll	ll	lm	lm
59	2371	29029	<lmxll>		7	30.98	0.405	RACA40	GCAAGTGATGGAAAAACAATGGATTGTTGATTTCATAGATGTCTTGAAAAT	39	T	C	lm	lm	ll	ll	ll	ll	ll	lm	lm	ll	lm	ll	lm	lm	ll	lm	lm	lm	ll	ll	ll	ll	ll	lm	ll	ll	ll	ll	ll	lm	ll	ll	lm	ll	ll	lm	lm
60	2341	28721	<lmxll>		7	32.388	1.408	RACA40	TTACAGTTTAGAATATGGTCAGCAATGAACACCAGTTGAAATTTCTAAACC	11	A	G	lm	lm	ll	ll	ll	ll	ll	lm	lm	ll	lm	ll	lm	lm	ll	lm	lm	lm	ll	ll	ll	ll	ll	lm	ll	ll	ll	ll	ll	lm	ll	ll	lm	ll	ll	lm	lm
61	2340	28714	<lmxll>		7	32.608	0.22	RACA40	GCTAGAGCTGCACTAGAGCTACACTAGAGCTGCACTGGAACTCTGAGAGAG	20	A	G	lm	lm	ll	ll	ll	ll	ll	lm	lm	ll	lm	ll	lm	lm	ll	--	lm	lm	ll	ll	ll	ll	ll	lm	ll	ll	ll	ll	ll	lm	ll	ll	lm	ll	ll	lm	lm
62	2357	28853	<lmxll>		7	33.494	0.886	RACA40	TGTCTCACAAGCAACAAAAGAGACAAACAATTCAGACTTCACAAACGTGCA	5	C	T	ll	ll	lm	lm	lm	lm	lm	ll	ll	lm	ll	lm	ll	ll	lm	ll	ll	ll	lm	lm	lm	lm	lm	ll	lm	lm	lm	lm	lm	ll	lm	lm	ll	lm	lm	ll	ll
63	3980	48733	<nnxnp>		7	34.998	1.504	RACA39	GAGGAATTATCAATTCAGAGAGGAGCATGAGCCAAAGGATGGGTTAAATAC	7	A	T	nn	np	np	nn	np	np	np	np	nn	np	np	nn	nn	np	nn	np	np	nn	nn	nn	nn	np	nn	nn	np	nn	nn	nn	np	nn	np	nn	nn	np	np	np	nn
64	2463	30038	<lmxll>		7	36.386	1.388	RACA40	TAAATCAAACTGATTAAAAAGAAAAACAAGTTCTTTACAAGTCATTCGATT	46	C	T	ll	ll	lm	lm	lm	lm	lm	lm	ll	lm	ll	lm	ll	ll	lm	ll	ll	ll	lm	lm	lm	lm	lm	ll	lm	lm	lm	lm	lm	ll	lm	lm	ll	lm	lm	ll	ll
65	2473	30216	<lmxll>		7	36.386	0	RACA40	GGAAAAAAGTCAGGGTGGTTGATTTCAAGGATCAGGATTGAGCACTCCTGC	6	A	C	lm	lm	ll	ll	ll	ll	ll	ll	lm	ll	lm	ll	lm	lm	ll	lm	lm	lm	ll	ll	ll	ll	ll	lm	ll	ll	ll	ll	ll	lm	ll	ll	lm	ll	ll	lm	lm
66	2471	30180	<lmxll>		7	36.413	0.027	RACA40	GTGCACCGCTGGGCCTCACAGCTCAGTCACAGTTACACACATATTTCCACA	30	A	C	lm	lm	--	ll	ll	ll	ll	ll	lm	ll	lm	ll	lm	lm	ll	lm	lm	lm	ll	ll	ll	ll	ll	lm	ll	ll	ll	ll	ll	lm	ll	ll	lm	ll	ll	lm	lm
67	2335	28673	<lmxll>		7	36.74	0.327	RACA40	CCACATTTTGAAAAGTACTAGAAATAGTTTAAATATTTTCCAGAGGCTTTA	17	C	T	ll	ll	lm	lm	lm	lm	lm	ll	ll	lm	ll	lm	ll	ll	lm	ll	ll	ll	lm	lm	lm	lm	lm	ll	lm	lm	lm	lm	lm	ll	lm	lm	ll	lm	lm	ll	ll
68	2333	28648	<lmxll>		7	36.867	0.127	RACA40	GTGACTCTATATGTGACAGGATGTTAGAAAAGTGTAATGCTGTGAGGGGAT	35	A	T	ll	ll	--	lm	lm	lm	lm	ll	ll	lm	ll	lm	ll	ll	lm	ll	ll	ll	lm	lm	lm	lm	lm	ll	lm	lm	lm	lm	--	ll	lm	lm	ll	lm	lm	ll	ll
69	3977	48714	<nnxnp>		7	37.068	0.201	RACA39	TCGGGAACAAATTTACAACAATTCAAAAGATAATCTGGGACTTTAAGAATT	23	T	C	nn	np	--	nn	np	np	np	np	nn	np	np	nn	nn	np	nn	np	np	nn	nn	nn	nn	np	nn	nn	np	--	nn	--	--	nn	np	nn	nn	np	np	np	nn
70	3988	48831	<nnxnp>		7	37.685	0.617	RACA39	ATGTTAACAGCACCGGTGAGGAACGTCTCAAACGTACATAACCATCTGAGG	32	C	T	nn	np	--	nn	np	np	np	np	nn	np	np	nn	nn	np	nn	np	np	nn	nn	nn	nn	np	nn	nn	np	nn	nn	nn	nn	nn	np	nn	nn	np	np	np	nn
71	2458	29967	<lmxll>		7	41.533	3.848	RACA40	NAATTCCATGAAAATTTAAAAGGGATCAAATTTCTTGAGCAAAAATAATGC	23	G	T	ll	ll	lm	lm	lm	lm	lm	lm	ll	lm	ll	lm	ll	ll	lm	ll	ll	ll	lm	lm	lm	lm	lm	lm	lm	lm	lm	lm	lm	ll	lm	lm	ll	lm	lm	ll	ll
72	2453	29934	<lmxll>		7	41.886	0.353	RACA40	ATTATTATCATTTACAGAAATCGGTCCCAGAAATGTAGTACCAGCATTGTT	29	G	A	ll	ll	lm	lm	lm	lm	lm	lm	ll	lm	ll	lm	ll	ll	lm	ll	ll	--	lm	lm	lm	lm	lm	lm	lm	lm	lm	lm	lm	ll	lm	lm	ll	lm	lm	ll	ll
73	2447	29853	<lmxll>		7	42.949	1.063	RACA40	GGAAGTGAGCAGCCTGAAAGTAAAAAATGTTTTCAGTACAAGAGAGTAGTA	45	G	C	ll	ll	lm	lm	lm	lm	lm	lm	ll	ll	ll	lm	ll	ll	lm	ll	ll	ll	lm	lm	lm	lm	lm	lm	lm	lm	lm	lm	--	ll	lm	lm	ll	lm	lm	ll	ll
74	2433	29746	<lmxll>	2433	7	43.471	0.522	RACA40	CGTCTCTATATCTTCTTTTGCTTCTTCATTCTATTCATTTCCTTCCAACTG	41	C	T	ll	ll	lm	lm	lm	lm	lm	lm	ll	ll	ll	lm	ll	ll	lm	ll	ll	ll	lm	lm	lm	lm	lm	lm	lm	lm	lm	lm	lm	ll	lm	lm	ll	lm	lm	ll	ll
75	2435	29768	<lmxll>	2433	7	43.471	0	RACA40	AATAAATTAAATTTTACAGAAAAGTTAAGAAATGTAGACATTGCAGCAACA	33	G	C	ll	ll	lm	lm	lm	lm	lm	lm	ll	ll	ll	lm	ll	ll	lm	ll	ll	ll	lm	lm	lm	lm	lm	lm	lm	lm	lm	lm	lm	ll	lm	lm	ll	lm	lm	ll	ll
76	2436	29774	<lmxll>		7	44.063	0.592	RACA40	AAACTCAACAGCCACTTTACTAGATACGTCTTGCTATTTCCCTTTGCCTTC	23	A	G	ll	ll	--	lm	lm	lm	lm	lm	ll	ll	ll	lm	ll	ll	lm	ll	ll	ll	lm	lm	lm	lm	lm	lm	lm	lm	lm	lm	lm	ll	lm	lm	ll	lm	lm	ll	ll
77	2467	30067	<lmxll>		7	44.072	0.009	RACA40	ATACTATGCATATAGTTTGAAACAACCAGTTTTTAGCTAATTAGTGAATCC	45	G	A	ll	ll	lm	lm	lm	lm	lm	lm	ll	lm	ll	lm	ll	ll	lm	ll	ll	ll	lm	lm	lm	lm	lm	ll	lm	lm	lm	lm	lm	ll	lm	lm	ll	lm	lm	ll	ll
78	2444	29826	<lmxll>		7	45.505	1.433	RACA40	GAATTCTTTTTATTTTAATATCTTATCTTCTTTTGTCTTTTTATTTAAAAC	28	T	A	ll	ll	lm	lm	lm	lm	lm	lm	ll	ll	ll	lm	ll	ll	lm	ll	ll	ll	lm	lm	lm	lm	lm	lm	lm	lm	lm	lm	lm	ll	lm	lm	ll	lm	lm	ll	ll
79	2431	29714	<lmxll>		7	48.464	2.959	RACA40	ATGGGATATTAAGAAAAACTACCAGTTTGTGCATCAAACTTGATTAAACTG	22	C	T	ll	ll	lm	lm	lm	lm	lm	lm	ll	ll	ll	lm	ll	ll	lm	ll	ll	ll	lm	lm	lm	lm	lm	lm	lm	lm	lm	lm	lm	ll	lm	lm	ll	lm	lm	ll	ll
80	2446	29838	<lmxll>		7	49.478	1.014	RACA40	GCATTTTTGGATCCTCTGATGAAAAAAATTGAGAGACTTCTATCTGAGCTC	28	T	C	ll	ll	lm	lm	lm	lm	lm	lm	ll	ll	ll	lm	ll	ll	lm	ll	ll	ll	lm	lm	lm	lm	lm	lm	lm	lm	lm	lm	lm	ll	lm	lm	ll	lm	lm	ll	ll
81	2440	29817	<lmxll>		7	49.765	0.287	RACA40	AGTACATGGATCTAGTCGTTTATTCCATCGGAATGGAGTGGAGCAGGGAGC	4	C	T	ll	ll	lm	lm	lm	lm	lm	lm	ll	ll	ll	lm	ll	ll	lm	ll	ll	ll	lm	lm	lm	lm	lm	lm	lm	lm	lm	lm	lm	ll	lm	lm	ll	lm	lm	ll	ll
82	2426	29647	<lmxll>		7	53.881	4.116	RACA40	TAGTTATTTTGTTATAAAACATGTTTTTTCCAACCACAGCTTGACTTTTGT	14	T	C	ll	ll	--	lm	lm	lm	lm	lm	ll	ll	ll	lm	ll	lm	lm	ll	lm	ll	lm	lm	lm	lm	lm	lm	lm	lm	lm	lm	lm	ll	lm	lm	ll	lm	lm	ll	ll
83	2422	29610	<lmxll>		7	58.615	4.734	RACA40	GACTCACCTACAGAGAGCAGCTTGTGGGGGAAGTATTATGATGTGGGGTTG	16	G	C	ll	ll	lm	lm	lm	lm	ll	lm	ll	ll	ll	lm	ll	lm	lm	ll	lm	ll	lm	ll	lm	lm	lm	lm	lm	lm	lm	lm	lm	ll	lm	lm	ll	lm	lm	ll	ll
84	2416	29546	<lmxll>		7	60.331	1.716	RACA40	TCAGCAGCTTCACGTCTCATATTCAAAGCTAATGCTAGCGTTAGCATTAGC	21	T	G	ll	ll	lm	lm	lm	lm	ll	lm	ll	ll	ll	lm	ll	lm	lm	ll	lm	ll	lm	ll	ll	lm	lm	lm	lm	lm	lm	lm	lm	ll	lm	lm	ll	lm	lm	ll	ll
85	2408	29450	<lmxll>		7	61.396	1.065	RACA40	AAATCTACTGGAATGATTGTGTTAACGGTTGAAAAGTTACAGTAAATCTAA	18	G	T	ll	ll	lm	lm	lm	lm	ll	lm	ll	ll	ll	lm	ll	lm	lm	ll	lm	ll	lm	ll	ll	lm	lm	lm	lm	lm	lm	lm	lm	ll	lm	lm	ll	lm	lm	ll	ll
86	2407	29449	<lmxll>		7	61.703	0.307	RACA40	TTTTTTGTTTTTAGTTTGACTAACAAATATAAAAATTGAAGATTTTTCATT	37	G	T	lm	lm	ll	ll	ll	ll	lm	ll	lm	lm	lm	ll	lm	ll	ll	lm	ll	lm	ll	lm	lm	--	ll	ll	ll	ll	ll	ll	ll	lm	ll	ll	lm	ll	ll	lm	lm
87	2403	29390	<lmxll>		7	63.503	1.8	RACA40	TAGGATCAGCAAGAAGATGTTTTTAGAAAAATATATGTCAGAGCAAGAACG	38	C	T	--	ll	lm	lm	lm	lm	ll	lm	ll	ll	ll	lm	ll	lm	lm	lm	lm	ll	lm	ll	ll	lm	lm	lm	lm	lm	lm	lm	--	ll	lm	lm	ll	lm	lm	ll	ll
88	2428	29667	<lmxll>		7	76.263	12.76	RACA40	GTCTCTTTGTTTTCCGTATTTCATAGGAGTTCAACGATTAATCCATTTCTG	3	T	C	ll	lm	--	lm	lm	lm	ll	lm	ll	ll	ll	lm	lm	lm	lm	lm	lm	ll	lm	ll	ll	lm	lm	lm	lm	lm	lm	lm	lm	ll	--	lm	ll	lm	ll	ll	ll
89	2409	29500	<lmxll>	2394	7	77.92	1.657	RACA40	TCAGACGCGTAGATTCTCCAGCGGCGTGACTGAACGGCTCAAACTCGCCGT	9	T	C	ll	lm	lm	lm	ll	lm	ll	lm	ll	ll	ll	lm	lm	lm	lm	lm	lm	ll	lm	ll	ll	lm	lm	lm	lm	lm	lm	lm	lm	ll	lm	lm	ll	lm	ll	ll	ll
90	2415	29545	<lmxll>	2394	7	77.92	0	RACA40	TTTCTGGCTCTGACCACAGAACGAGGAAATCTTTCCACAAATGTGAAGACG	7	C	G	ll	lm	lm	lm	ll	lm	ll	lm	ll	ll	ll	lm	lm	lm	lm	lm	lm	ll	lm	ll	ll	lm	lm	lm	lm	lm	lm	lm	lm	ll	lm	lm	ll	lm	ll	ll	ll
91	2394	29311	<lmxll>	2394	7	77.92	0	RACA40	GCGTTGATTAGAGAAATGAGGCAAAAGCTGGAAGGAAATCTGATATATTGG	20	G	A	ll	lm	lm	lm	ll	lm	ll	lm	ll	ll	ll	lm	lm	lm	lm	lm	lm	ll	lm	ll	ll	lm	lm	lm	lm	lm	lm	lm	lm	ll	lm	lm	ll	lm	ll	ll	ll
1	3697	45073	<lmxll>		8	0		RACA22	CCACTGGATTCCAGCCGGAGCTCAACCAGGTCTCCAATGGATCCCAGCCTT	15	C	T	lm	ll	lm	lm	lm	ll	lm	lm	lm	ll	ll	lm	lm	lm	lm	lm	lm	ll	--	lm	ll	lm	ll	ll	lm	lm	lm	--	--	lm	lm	ll	ll	lm	lm	lm	lm
2	3604	43861	<lmxll>		8	1.174	1.174	RACA22	CCTGTCACGTTTACTCTCAAACGCTGGAGCGTTTTCACTAAAGAGCAGCAT	28	G	A	lm	ll	lm	lm	lm	lm	lm	lm	lm	ll	ll	lm	ll	lm	lm	ll	lm	ll	ll	lm	--	lm	ll	ll	lm	lm	--	ll	lm	lm	lm	ll	--	lm	lm	lm	lm
3	3653	44579	<lmxll>	3653	8	2.117	0.943	RACA22	TCGTCCTCAAAATGAAGAAGAAAGCATCATTATAAAGTGATTCAAACCTCA	23	G	A	lm	ll	--	lm	lm	ll	lm	lm	lm	ll	ll	lm	ll	lm	lm	lm	lm	ll	ll	lm	ll	lm	ll	ll	lm	lm	lm	ll	lm	lm	lm	ll	ll	lm	lm	lm	lm
4	3750	45816	<lmxll>	3653	8	2.117	0	RACA22	GTGAAAGCCTGTTTTACTGGAAGTTCTCTGTTTGTCTGAGCTTTTCTGAAT	30	T	C	lm	ll	--	lm	lm	ll	lm	lm	lm	ll	ll	lm	ll	lm	lm	lm	lm	ll	ll	lm	ll	lm	ll	ll	lm	lm	lm	ll	lm	lm	lm	ll	ll	lm	lm	lm	lm
5	3619	44040	<lmxll>	3619	8	2.158	0.041	RACA22	TCACAAAGCAATCAAACTCTGAACACAGATTGGTCCAGCAATCAAACTCTC	7	G	A	lm	ll	lm	lm	lm	ll	lm	lm	lm	ll	ll	lm	ll	lm	lm	lm	lm	ll	ll	lm	ll	lm	ll	ll	lm	lm	lm	ll	lm	lm	lm	ll	ll	lm	lm	lm	lm
6	3621	44063	<lmxll>	3619	8	2.158	0	RACA22	CAAACGTCCGCCTTGACCTTCAGTTTCAGGAGAAGATCCAGGACATCCTGC	10	C	T	lm	ll	lm	lm	lm	ll	lm	lm	lm	ll	ll	lm	ll	lm	lm	lm	lm	ll	ll	lm	ll	lm	ll	ll	lm	lm	lm	ll	lm	lm	lm	ll	ll	lm	lm	lm	lm
7	3702	45203	<lmxll>		8	3.482	1.324	RACA22	TTCTTATGTGGATTCAGCCTCCAGGAGGCTCAAAAATGAGAATTTCTTTCC	16	G	T	lm	ll	lm	lm	lm	ll	lm	lm	lm	ll	ll	lm	ll	lm	lm	lm	lm	ll	ll	lm	ll	lm	ll	ll	lm	lm	lm	ll	lm	lm	lm	ll	ll	lm	lm	lm	lm
8	3632	44239	<lmxll>		8	3.624	0.142	RACA22	CTTTTTGCAGATCAAACAGGTGACATTAATACAGGTAGGATAGAAAAGCTT	6	G	A	lm	ll	lm	lm	lm	ll	lm	lm	lm	--	ll	lm	ll	lm	lm	lm	lm	ll	ll	lm	ll	lm	ll	ll	lm	lm	lm	ll	lm	lm	lm	ll	ll	lm	lm	lm	lm
9	3633	44243	<lmxll>		8	4.284	0.66	RACA22	TTTTCAGGAGAGCAGCTTCACACGGAGGGAAAGGTGTTTGTCAGAGAGATT	18	C	T	lm	ll	--	lm	lm	ll	lm	lm	lm	ll	ll	lm	ll	lm	--	lm	lm	ll	ll	lm	ll	lm	--	ll	lm	lm	lm	ll	--	--	lm	ll	ll	lm	lm	lm	lm
10	3639	44340	<lmxll>		8	5.477	1.193	RACA22	GAGCTGAAATATTTAAAGAGAAAACCTGTAAAAATGTTTTAAAACGGTAAG	45	G	T	lm	ll	lm	lm	lm	ll	lm	lm	lm	ll	ll	lm	ll	lm	lm	lm	lm	ll	ll	lm	ll	lm	ll	ll	lm	lm	lm	ll	lm	lm	lm	ll	ll	lm	lm	lm	lm
11	3638	44323	<lmxll>		8	5.51	0.033	RACA22	TGGATCACCTTAATACCTGTGTGCCCCCCCAACCCCCCGATGAGGCATTGA	44	G	A	lm	ll	lm	lm	lm	ll	lm	lm	lm	ll	ll	lm	ll	lm	lm	lm	lm	ll	ll	lm	ll	lm	ll	ll	lm	lm	lm	ll	lm	lm	lm	ll	ll	lm	lm	lm	lm
12	3722	45465	<lmxll>		8	9.797	4.287	RACA22	NAATTCTTTTGCAATGATTTCATTTTTCATGACTGACTTCTGAAAAGCTTT	12	A	T	ll	lm	ll	ll	ll	ll	ll	ll	ll	lm	lm	ll	lm	lm	ll	ll	ll	lm	lm	ll	lm	ll	lm	lm	ll	ll	ll	lm	--	ll	ll	lm	lm	ll	ll	lm	ll
13	3718	45445	<lmxll>		8	9.806	0.009	RACA22	GATTAGCTGCCTGAGATGGATGATTGTTTTGTCACTCATGTTTTGAGGTTG	9	C	T	ll	lm	--	ll	ll	ll	ll	ll	ll	lm	lm	ll	lm	lm	ll	ll	ll	lm	lm	ll	lm	ll	lm	lm	ll	ll	ll	lm	ll	ll	ll	lm	lm	ll	ll	lm	ll
14	3699	45169	<hkxhk>		8	11.148	1.342	RACA22	GCAGGGTGTGTCAGGTGCAGAGCAGAATCAGGTCTGACCGGTTCTGACTGC	39	G	A	hk	hk	hk	hk	hh	hk	hh	hk	hh	hk	kk	hh	hk	kk	hh	hk	hk	hk	kk	hh	hk	hh	hk	kk	hh	hh	hh	hk	hh	hh	hk	kk	kk	hh	hk	hk	hh
15	3723	45466	<lmxll>		8	11.175	0.027	RACA22	GAATTCCACTCACCAGAACTGCTTATTATCAGGTCGTAAAAATGTTCAATT	46	C	A	lm	ll	lm	lm	lm	lm	lm	lm	lm	ll	ll	lm	ll	ll	lm	lm	lm	ll	ll	lm	ll	lm	ll	ll	lm	lm	lm	ll	lm	lm	lm	ll	ll	lm	lm	ll	lm
16	3709	45387	<lmxll>		8	11.437	0.262	RACA22	GAATCATTGTACCATTTAACTCTTCTTGTGTAACTCAAAATCATTTGTGTG	15	T	A	ll	lm	ll	ll	ll	ll	ll	ll	ll	lm	lm	ll	lm	lm	ll	ll	ll	lm	lm	ll	lm	ll	lm	lm	ll	ll	ll	lm	ll	ll	ll	lm	lm	ll	ll	lm	ll
17	3640	44381	<hkxhk>		8	13.544	2.107	RACA22	GAAACTCTACTTTTCATTTTCTCCTAAAAATGACTCAAGTTACATATCAAG	41	A	T	hk	hk	hk	hk	kk	hk	kk	hk	kk	hk	hh	kk	hk	hk	kk	hk	hk	hk	hh	kk	hk	kk	hk	hh	kk	kk	kk	hk	kk	kk	hk	hh	hh	kk	hk	hk	kk
18	3698	45113	<hkxhk>		8	14.568	1.024	RACA22	ATTTTTCTATCGTTATTTTTAAATTCAGGAAAAAGTGACCTGTAAGTCTTT	24	T	G	hk	hk	hk	hk	hh	hk	hh	hk	hh	hk	kk	hh	hk	kk	hh	hk	hk	hk	kk	hh	hk	hh	hk	kk	hh	hh	hh	hk	hh	hh	hk	kk	kk	hh	hk	hk	hh
19	3721	45462	<lmxll>		8	15.513	0.945	RACA22	AAAAACAAACTGAATTTACCTTTATTTATCCTAAAATGCTGATGTTTACAG	22	T	C	ll	lm	ll	ll	ll	ll	ll	ll	ll	lm	lm	ll	lm	lm	ll	ll	ll	lm	lm	ll	--	ll	lm	lm	ll	ll	ll	lm	--	ll	ll	lm	lm	ll	ll	lm	ll
20	3664	44695	<hkxhk>		8	15.85	0.337	RACA22	AATATCAATGGGATTTCCTGGTAAAATAAAGGTAAAATAAAAAATTTGATC	44	T	A	hk	hk	hk	hk	kk	hk	kk	hk	kk	hk	hh	kk	hk	hk	kk	hk	hk	hk	hh	kk	hk	kk	hk	hh	kk	kk	kk	hk	--	kk	hk	hh	hh	kk	hk	hk	kk
21	3654	44582	<hkxhk>		8	15.873	0.023	RACA22	CTGAGGATTCACAAAAGGATCTCTAAGGATTCAGGAAGGATCTCTGAGGAT	47	G	A	hk	hk	hk	hk	kk	hk	kk	hk	kk	hk	hh	kk	hk	hk	kk	hk	hk	hk	hh	kk	hk	kk	hk	hh	kk	kk	kk	hk	kk	kk	hk	hh	hh	kk	hk	hk	kk
22	3645	44469	<hkxhk>		8	16.262	0.389	RACA22	ACAGGATCTGCTCAAAGCAGCCTGCTGCCAAAAACATGGTTTTCTGGATCT	33	A	T	hk	hk	hk	hk	kk	hk	kk	hk	kk	hk	hh	kk	hk	hk	kk	hk	hk	hk	hh	kk	hk	kk	hk	--	kk	kk	kk	hk	kk	kk	hk	hh	hh	kk	hk	hk	kk
23	3701	45188	<hkxhk>		8	16.617	0.355	RACA22	AATTCCAAGTAAGAAATAACCATAAAATGTATAGAAAAGAAAAAAAATACT	38	G	T	hk	hk	hk	hk	kk	hk	kk	hk	kk	hk	hh	kk	hk	hh	kk	hk	hk	hk	hh	kk	hk	kk	hk	hh	kk	kk	kk	hk	kk	kk	hk	hh	hh	kk	hk	hk	kk
24	3700	45170	<hkxhk>		8	17.075	0.458	RACA22	GCATATTAAACAACAACAAGCAAACACAGAAAAAAAACAACTTTCTGTGTT	9	A	C	hk	hk	hk	hk	kk	hk	kk	hk	kk	hk	hh	kk	hk	hh	kk	hk	hk	hk	hh	--	hk	kk	hk	hh	kk	kk	kk	hk	kk	kk	hk	hh	hh	--	hk	hk	kk
25	3692	44993	<hkxhk>		8	17.464	0.389	RACA22	CCGATCACGGTGAGACTTAAAAAGTTAGAAAATTACGGTTTAAAAGTTTTT	36	G	A	hk	hk	hk	hk	hh	hk	hh	hk	hh	hk	kk	hh	hk	kk	hh	hk	hk	hk	kk	hh	hk	hh	hk	hk	hh	hh	hh	hk	hh	hh	hk	kk	kk	hh	hk	hk	hh
26	3717	45440	<hkxhk>		8	18.812	1.348	RACA22	TTTTCAAACATTTTTTCATCTGCTCTTCATTCTCTATGATTGGAAAATAGA	27	C	A	hk	hk	hk	hk	kk	kk	kk	hk	kk	hk	hh	hk	hk	hh	kk	hk	hk	hk	hh	kk	hk	kk	hk	hh	kk	kk	kk	hk	kk	kk	hk	hh	hh	kk	hk	hh	kk
27	3710	45393	<hkxhk>		8	19.748	0.936	RACA22	TTGAGTGGATACGTTGGTGATGTGACAGGTTCTGTTTTTCTGGAATGGCTC	25	C	T	hk	hk	hk	hk	kk	kk	kk	hk	kk	hk	hh	hk	hk	hh	kk	hk	hk	hk	hh	kk	hk	kk	hk	hh	kk	kk	kk	hk	kk	kk	hk	hh	hh	kk	hk	hh	kk
28	3706	45325	<hkxhk>		8	19.969	0.221	RACA22	CACGAGGCTTCGGTTTATCCAAAGGTATTGACTTGAGTTCATATGCCATGT	17	T	C	hk	hk	hk	hk	hh	hh	hh	hk	hh	hk	kk	hk	hk	kk	hh	hk	hk	hk	kk	hh	hk	hh	hk	kk	hh	hh	hh	hk	hh	hh	hk	kk	kk	hh	hk	kk	hh
29	3708	45385	<hkxhk>		8	20.456	0.487	RACA22	TCAATGTTCATCTCATTCCTTTCATCTGTGAAGTTGAGATTTCAAATTTTT	9	A	G	hk	hk	hk	hk	hh	hh	hh	hk	hh	hk	kk	hk	hk	kk	hh	hk	hk	hk	kk	hh	hk	hh	hk	kk	hh	hh	hh	hk	hh	hh	hk	kk	kk	hh	hk	kk	hh
30	3713	45412	<hkxhk>		8	21.194	0.738	RACA22	GAGTAACATCCGACTCTGCTGGATCAACTTTTATTCAGTCATGATCTTCAA	43	A	G	hk	hk	hk	hk	kk	kk	kk	hk	kk	hk	hh	hk	hk	hh	kk	hk	hk	hk	hh	kk	hk	kk	hk	hh	kk	kk	kk	hk	--	kk	hk	hh	hh	kk	hk	hh	kk
31	3733	45613	<nnxnp>		8	22.549	1.355	RACA22	TTGGTCTTGGCCATGTTAGTAGTTAGAGTCTTACTGATTGTACGGGGTGGA	4	T	A	nn	np	nn	nn	np	np	np	nn	np	np	nn	nn	np	nn	np	nn	nn	np	nn	np	np	np	np	nn	np	np	np	np	np	np	nn	nn	nn	np	nn	nn	np
32	3737	45664	<lmxll>		8	22.567	0.018	RACA22	CGAGAGCGATTCTATCTTCTAGTGATTCATAACTGGCTGCTCAAAGTTATC	12	T	A	lm	lm	ll	ll	ll	ll	ll	ll	ll	ll	lm	ll	lm	lm	ll	ll	ll	lm	lm	ll	ll	ll	lm	ll	ll	ll	ll	lm	ll	ll	ll	lm	lm	ll	ll	lm	ll
33	3739	45679	<lmxll>		8	22.827	0.26	RACA22	GGAGAAAAGGTGTGTAAAAAGATGTTGAAATGAAGCTCCGGTATTTCTCTC	8	G	A	lm	lm	ll	ll	ll	ll	ll	ll	ll	--	lm	ll	lm	lm	ll	ll	ll	lm	lm	ll	ll	ll	lm	ll	ll	ll	ll	lm	ll	ll	ll	lm	lm	ll	ll	lm	--
34	3734	45622	<nnxnp>		8	23.023	0.196	RACA22	TAGTCAGTATCTATAATACTAAACTGTGAACGAGCACAAGGAAATGGGTCA	32	A	G	nn	np	nn	nn	np	np	np	nn	np	np	nn	nn	np	nn	np	nn	nn	np	nn	np	np	np	np	nn	np	np	np	np	np	np	nn	nn	nn	np	nn	nn	np
35	3731	45596	<nnxnp>		8	23.949	0.926	RACA22	CACTGAGCACTCAACTTTCAAACTAATGGAAGAAAGTTAAAACAATCCTTT	38	G	A	nn	np	nn	nn	np	np	np	nn	np	np	nn	nn	np	nn	np	nn	nn	np	nn	np	np	np	np	nn	np	np	np	np	np	np	nn	nn	nn	np	nn	nn	np
36	3740	45680	<lmxll>		8	24.115	0.166	RACA22	CACATTTTGTTAATAAGTTTTCCTCAGACTGTATTCAGAGGAACTTGGTCC	42	A	T	lm	lm	ll	--	ll	ll	ll	ll	ll	ll	lm	ll	lm	lm	ll	ll	ll	lm	lm	ll	ll	ll	lm	ll	ll	ll	ll	lm	ll	ll	ll	lm	lm	ll	--	lm	--
37	3732	45609	<efxeg>		8	24.499	0.384	RACA22	AATTCTCGATTTTCATCTCATATTCTCACAATGTTCACATTATGCTCTGAA	7	A	G	ef	eg	ee	ef	fg	fg	fg	ef	fg	fg	ee	ef	eg	ee	fg	ef	ef	eg	ee	fg	eg	--	eg	ef	fg	fg	fg	eg	fg	fg	ef	ee	ee	fg	ef	ee	fg
38	3729	45590	<efxeg>		8	24.884	0.385	RACA22	ATCCTTTAGCTTGTTTTCCTACCATGTCCATCCTGCTCACTCCTAAATACT	20	A	G	ef	eg	--	ef	fg	fg	fg	ef	fg	fg	ee	ef	eg	ee	fg	ef	ef	eg	ee	fg	--	fg	eg	ef	fg	fg	fg	eg	fg	fg	ef	ee	ee	fg	ef	ee	fg
39	3743	45711	<hkxhk>		8	25.891	1.007	RACA22	AAAACAGTCAGAGGCGCTAAAATATCAAATAAAAACATCAGCAAAACAGTG	17	T	C	hk	--	--	kk	hk	hk	hk	kk	hk	hk	hk	kk	hh	hk	hh	kk	kk	hh	hk	hk	hk	kk	hh	kk	hk	hk	hk	hh	--	hk	kk	hk	hk	hk	kk	hk	hk
40	3730	45595	<hkxhk>		8	26.398	0.507	RACA22	AATGAGTCCTGTTGGGTAGTTGGCACTTATCCACTCCCTCAAAGTCACCAT	9	T	A	hk	hk	hk	hk	hh	hh	hh	hk	hh	hh	kk	hk	hk	kk	hh	hk	hk	hk	kk	hh	hk	hh	hk	hk	hh	hh	hh	hk	hh	hh	hk	kk	kk	hh	hk	kk	hh
41	3724	45473	<nnxnp>	3724	8	27.138	0.74	RACA22	ATAAAAAGTCAAATATGATTTTATATTCAATTTATCTTAGATTTTTTATAT	39	C	G	nn	np	nn	nn	np	np	np	nn	np	np	nn	nn	np	nn	np	nn	nn	np	nn	np	np	np	np	nn	np	np	np	np	np	np	nn	nn	nn	np	nn	nn	np
42	3725	45482	<nnxnp>	3724	8	27.138	0	RACA22	ATAGCACTTAAAGAGACATTCAGGCGGATTTTCACTGACAACCCAGAGGGA	33	C	A	nn	np	nn	nn	np	np	np	nn	np	np	nn	nn	np	nn	np	nn	nn	np	nn	np	np	np	np	nn	np	np	np	np	np	np	nn	nn	nn	np	nn	nn	np
43	3746	45789	<lmxll>		8	27.706	0.568	RACA22	TCAGGTCAGTTTTAGTGGTCATTCCTCTCATCCACTTAAGAACCGGAGCTG	7	A	G	ll	ll	--	lm	lm	lm	lm	lm	lm	lm	ll	lm	ll	ll	ll	lm	lm	ll	ll	lm	lm	lm	ll	lm	lm	lm	lm	ll	--	lm	lm	ll	ll	lm	lm	ll	lm
44	3742	45691	<hkxhk>		8	28.868	1.162	RACA22	CTTCTTCAGAATGCAGTGCCTCAAGGCAGCAGAAATGAATGTGGTAATCAG	30	A	G	hk	--	hh	hh	hk	hk	hk	hh	hk	hk	hk	hh	--	hk	hk	hh	hh	kk	hk	hk	hk	hk	kk	hh	hk	hk	hk	kk	hk	hk	hh	hk	hk	hk	hh	hk	hk
45	3747	45798	<lmxll>		8	29.955	1.087	RACA22	GAAAACACACCATTTCATAAAAAAAACACATTATTTCGTGATTAAATAAAC	10	C	A	ll	ll	lm	lm	lm	lm	lm	lm	lm	lm	ll	lm	ll	ll	--	lm	lm	ll	ll	lm	lm	lm	ll	lm	lm	lm	lm	lm	lm	lm	lm	ll	ll	lm	lm	ll	lm
46	3751	45823	<lmxll>		8	30.505	0.55	RACA22	GAGCCATTATGGATCAAAGTCAAGGCAGAGCAGGAGAGTTGGGAGGTAAAA	31	A	G	ll	ll	lm	lm	lm	lm	lm	lm	lm	lm	ll	lm	ll	ll	ll	lm	lm	ll	ll	lm	lm	lm	ll	lm	lm	lm	lm	lm	lm	lm	lm	ll	ll	lm	lm	ll	lm
47	3594	43723	<lmxll>		8	30.653	0.148	RACA22	CACTAAATTTGACATGAAAACATCCAAAGCCATGTTATAAATGTACATAAA	15	G	A	ll	--	--	lm	lm	lm	lm	lm	lm	lm	ll	lm	ll	--	ll	lm	lm	ll	ll	lm	lm	lm	ll	lm	lm	lm	lm	lm	lm	lm	lm	ll	ll	lm	lm	ll	lm
48	3745	45761	<lmxll>		8	31.224	0.571	RACA22	TAAGTCACGTGATTTTGTTTACAAGCTTTGGTTTGAAACAGAAATCTCCAG	15	T	G	ll	ll	lm	lm	lm	lm	lm	lm	lm	lm	ll	lm	ll	ll	ll	lm	lm	ll	ll	lm	lm	lm	ll	lm	lm	lm	lm	lm	lm	lm	lm	ll	ll	lm	lm	ll	lm
49	3593	43722	<efxeg>		8	32.485	1.261	RACA22	TCATCTTAACCTATTGAGCAACAAAATTCAGTCACAATCTTACTTTAAATA	18	C	A	ee	eg	--	fg	fg	ef	fg	ef	fg	fg	ee	ef	eg	ee	eg	ef	ef	eg	ee	fg	ef	ef	eg	ef	fg	fg	fg	fg	fg	fg	ef	ee	ee	--	ef	ee	fg
50	3754	45868	<lmxll>		8	32.888	0.403	RACA22	AATAAAATGTTTCTTCATGTCTGCTTTGCTCTGGTAATTACAGCTCTTGCA	12	C	T	ll	ll	lm	lm	lm	lm	lm	lm	lm	lm	ll	lm	ll	ll	ll	lm	lm	ll	ll	lm	lm	lm	ll	lm	lm	lm	lm	lm	lm	lm	lm	ll	ll	lm	lm	ll	lm
51	3748	45809	<lmxll>	3748	8	33.742	0.854	RACA22	AGAACATCATATCAGAGCAATTAAAAATGTTGTTTCAGCGTAAATTTCAGA	35	C	T	ll	ll	lm	lm	lm	lm	lm	lm	lm	lm	ll	lm	ll	ll	ll	lm	lm	ll	ll	lm	lm	lm	ll	lm	lm	lm	lm	lm	lm	lm	lm	ll	ll	lm	lm	ll	lm
52	3749	45814	<lmxll>	3748	8	33.742	0	RACA22	GTGAGAAGCTGAGCTGTGATGATCTGAACGCCTAATCTTTCCACTTTTATC	9	T	C	ll	ll	lm	lm	lm	lm	lm	lm	lm	lm	ll	lm	ll	ll	ll	lm	lm	ll	ll	lm	lm	lm	ll	lm	lm	lm	lm	lm	lm	lm	lm	ll	ll	lm	lm	ll	lm
53	3600	43805	<lmxll>		8	34.322	0.58	RACA22	NAATTCCCCAGTTTGAAGGTCGCAGAATGGTCGTTGTGTGCAAAAAAAAAC	34	T	G	--	lm	lm	lm	lm	lm	lm	lm	lm	lm	ll	lm	lm	ll	ll	lm	lm	ll	ll	lm	lm	lm	ll	lm	lm	lm	lm	lm	lm	lm	lm	ll	ll	lm	lm	ll	lm
54	3599	43802	<lmxll>		8	35.29	0.968	RACA22	CAGCCGGGGCCAAAGTCTGCTCCAAATAGAACGGTACATGCTTGGAATCAA	6	G	A	ll	ll	--	lm	lm	lm	lm	lm	lm	lm	ll	lm	lm	ll	ll	lm	lm	ll	ll	lm	lm	lm	ll	lm	lm	lm	lm	lm	--	lm	lm	ll	ll	lm	lm	ll	lm
55	3601	43836	<nnxnp>		8	36.24	0.95	RACA22	TTATTTTTCCTTTGCGAAAACACGGAGTGAACTGGGTTAGGCAAACAGTTG	17	C	A	np	nn	--	nn	nn	np	nn	np	nn	nn	np	np	nn	np	nn	np	np	nn	np	nn	nn	np	nn	np	nn	nn	nn	nn	--	nn	np	np	np	np	np	np	nn
56	3607	43881	<lmxll>	3607	8	36.992	0.752	RACA22	ATTGAAAGCATCAATGCTTAAGATAAAAAGTATCTGTGTCTCTCAGGGCTC	11	C	T	lm	lm	ll	ll	lm	ll	ll	ll	ll	ll	lm	ll	ll	lm	lm	ll	ll	lm	lm	ll	ll	ll	lm	ll	ll	ll	ll	ll	ll	ll	ll	lm	lm	ll	ll	lm	ll
57	3608	43882	<lmxll>	3607	8	36.992	0	RACA22	GCTCCCCTCCTTTTCCAATAACTATACAAGAGAAATATATATTTTAAGTTT	16	A	G	lm	lm	ll	ll	lm	ll	ll	ll	ll	ll	lm	ll	ll	lm	lm	ll	ll	lm	lm	ll	ll	ll	lm	ll	ll	ll	ll	ll	ll	ll	ll	lm	lm	ll	ll	lm	ll
58	3596	43725	<nnxnp>		8	37.68	0.688	RACA22	TCCAGTTGCAATAAAATTTAATTTGCTTTAAAGCTACCACGATATCTAAAA	3	A	G	np	nn	--	nn	nn	np	nn	np	nn	nn	np	np	nn	np	nn	np	np	nn	np	nn	np	np	nn	np	nn	--	--	nn	nn	nn	np	np	np	np	np	np	nn
59	3603	43847	<nnxnp>		8	37.763	0.083	RACA22	AAAACCCTACCTTACACATAGTAGTGGATATCAGATCAAGAATGACCATCA	24	T	G	np	nn	nn	nn	nn	np	nn	np	nn	nn	np	np	nn	np	nn	np	np	nn	np	nn	np	np	nn	np	nn	nn	nn	nn	nn	--	np	np	np	np	np	np	nn
60	3614	43950	<lmxll>		8	38.755	0.992	RACA22	TGTGAACGGCGTCCCCCGGGGCACGTCCAGCTTCTCGGTCCAGATAGTAGC	7	G	A	lm	lm	ll	ll	lm	ll	ll	ll	ll	ll	lm	ll	ll	lm	lm	ll	ll	lm	lm	ll	ll	ll	lm	ll	ll	lm	ll	ll	ll	ll	ll	lm	lm	ll	ll	lm	ll
61	3602	43839	<nnxnp>		8	38.86	0.105	RACA22	TGGAGAGAAAATGAATGCCAGAGTCATGGAGAAGTGTCCATTTTTGAAAAA	5	A	G	np	nn	--	nn	nn	np	nn	np	nn	--	np	np	nn	np	nn	np	np	nn	np	nn	np	np	np	np	nn	nn	nn	nn	--	nn	np	np	np	np	np	np	nn
62	3610	43889	<lmxll>		8	39.408	0.548	RACA22	TTAACTGTCTGGCAAAAGTCCCACTTTGTTTATATTGTGCTTGAATTACTT	38	G	A	lm	lm	ll	ll	lm	ll	ll	ll	ll	ll	lm	ll	ll	lm	lm	ll	ll	lm	lm	ll	ll	ll	lm	ll	ll	lm	ll	ll	ll	ll	ll	lm	lm	ll	ll	lm	ll
63	3609	43886	<lmxll>		8	39.411	0.003	RACA22	GATCTGCAACTACAAAATGACTTGGTAGAAATCGTTGATGCAAGAAGTTCT	35	T	C	lm	lm	--	ll	lm	ll	ll	ll	ll	ll	lm	ll	ll	lm	lm	ll	ll	lm	lm	ll	ll	ll	lm	ll	ll	lm	ll	ll	--	ll	ll	lm	lm	ll	ll	lm	ll
64	3616	43961	<lmxll>		8	39.849	0.438	RACA22	NAATTCAGATTTAAAGCTTGCTTACCTTCATGATGAATCAACAGACAGCAC	32	A	G	lm	lm	ll	ll	lm	ll	ll	ll	ll	ll	lm	ll	ll	lm	lm	ll	ll	lm	lm	ll	ll	ll	lm	ll	ll	lm	ll	ll	ll	ll	ll	lm	lm	ll	ll	lm	ll
65	3618	43978	<lmxll>		8	41.082	1.233	RACA22	GGGACAGGAACTTAAGCGTGAGTCCTAAAACACACACCAACGGCCTCCGTG	16	C	T	ll	ll	lm	lm	ll	lm	lm	lm	lm	lm	ll	lm	lm	ll	ll	lm	lm	ll	ll	lm	lm	lm	ll	lm	lm	ll	lm	lm	lm	lm	lm	ll	lm	lm	lm	ll	lm
66	3622	44107	<lmxll>		8	43.153	2.071	RACA22	CCACACACATTTCATATAGACAAAAATAAAATAACTAAGCAGTCACTCCTG	16	T	A	lm	lm	ll	ll	lm	ll	ll	ll	ll	ll	lm	ll	ll	lm	lm	ll	lm	lm	lm	ll	ll	ll	lm	ll	ll	lm	ll	ll	ll	ll	ll	lm	ll	ll	ll	lm	ll
67	3597	43747	<nnxnp>		8	43.291	0.138	RACA22	CTGCCTCTACATTAAACTGTGTATTATTGTTGTTGTTGTATAGCTTGCATA	9	C	T	nn	np	--	np	np	nn	np	nn	np	np	nn	nn	np	nn	np	nn	nn	np	nn	np	nn	nn	np	nn	np	np	np	np	np	--	nn	nn	nn	nn	nn	nn	np
68	3620	44044	<lmxll>		8	43.591	0.3	RACA22	TAAAATGTGGGGAATTACAAAAAGCATTTGTATGTGACTCAATGACACGAG	25	A	G	ll	ll	lm	lm	ll	lm	lm	lm	lm	lm	ll	lm	lm	--	ll	lm	ll	ll	ll	lm	lm	lm	ll	lm	lm	ll	lm	lm	lm	lm	lm	ll	lm	lm	lm	ll	lm
69	3625	44124	<lmxll>		8	45.039	1.448	RACA22	GTCACCGTCCTGCATCTCCGCCTATCTGCTCTGCAATAGTGCAACAAATCA	18	C	T	ll	ll	lm	lm	ll	lm	lm	lm	lm	lm	ll	lm	lm	ll	ll	lm	ll	ll	ll	lm	lm	lm	ll	lm	lm	ll	lm	lm	lm	lm	lm	ll	lm	lm	lm	ll	lm
70	3637	44317	<lmxll>		8	45.518	0.479	RACA22	ACCATACTGTAGGAGCTTTTTCATCTGTCGGTACATCCCTTTTATTTTCTG	3	A	G	lm	lm	ll	ll	lm	ll	lm	ll	ll	ll	lm	ll	ll	lm	lm	ll	lm	lm	lm	ll	ll	ll	lm	ll	ll	lm	ll	ll	ll	ll	ll	lm	ll	ll	ll	lm	ll
71	3642	44396	<lmxll>		8	45.842	0.324	RACA22	CTATCTCGCCAGTGTAATCTTATGTGCTGCCTGCATGTGTGTTGAGACAAA	7	G	A	lm	lm	ll	ll	lm	ll	lm	ll	ll	ll	lm	ll	ll	lm	lm	ll	lm	lm	lm	ll	ll	ll	lm	ll	ll	lm	ll	ll	ll	ll	ll	lm	ll	ll	ll	lm	ll
72	3631	44182	<hkxhk>		8	46.698	0.856	RACA22	CATAAATACAAGAGGAACGGAATAAAGGAGAGAACGTTTGGACATCAAAAA	34	C	A	hk	hk	kk	kk	hk	hk	hk	kk	kk	kk	hh	kk	kk	hk	hk	hk	hh	hk	hk	kk	hk	hk	hk	kk	kk	hk	kk	kk	kk	hk	hk	hh	kk	hk	hk	hh	kk
73	3651	44546	<lmxll>		8	47.511	0.813	RACA22	TCAAGCAAGTTTTATGTCTTGTAGGGAAGAACCCGTCTAAGAACACCAGCA	25	G	A	ll	ll	lm	lm	ll	lm	ll	lm	lm	lm	ll	lm	lm	ll	ll	--	ll	ll	ll	lm	lm	lm	ll	lm	lm	--	lm	lm	ll	lm	lm	ll	lm	lm	lm	ll	lm
74	3649	44521	<lmxll>		8	47.746	0.235	RACA22	GCAGGTAGCTGTATCTCAGTTTGATGTGGCTATCACTACAATTTACCACTT	37	A	C	ll	ll	lm	lm	ll	lm	--	lm	lm	lm	ll	lm	lm	ll	ll	lm	ll	ll	ll	lm	lm	lm	ll	lm	lm	ll	lm	lm	--	--	lm	ll	lm	lm	lm	ll	lm
75	3646	44482	<lmxll>		8	47.99	0.244	RACA22	TATCTGGTGGGGTACGAATGATCTTGAGAATAGCGAGGAAATGAATAAAAG	18	T	C	ll	--	lm	lm	--	lm	ll	lm	lm	lm	ll	lm	lm	ll	ll	lm	ll	ll	ll	lm	lm	lm	ll	lm	lm	ll	lm	lm	lm	lm	lm	ll	lm	lm	lm	ll	lm
76	3647	44485	<lmxll>		8	48.206	0.216	RACA22	TGGAGGCTACTGCAGGTGGTGGCGGTGGGCAGTAACGATAGGACTCGCATG	46	G	A	ll	ll	lm	lm	ll	lm	ll	lm	lm	lm	ll	lm	lm	ll	ll	lm	ll	ll	ll	lm	lm	lm	ll	lm	lm	ll	lm	lm	lm	lm	lm	ll	lm	lm	lm	ll	lm
77	3652	44553	<lmxll>		8	48.364	0.158	RACA22	ATAATCATTCCTTCCTTCATCACACTTTCCAAAAATTCAAATTTAGTGCTT	37	C	T	ll	ll	lm	lm	ll	lm	ll	lm	lm	lm	ll	lm	lm	ll	ll	lm	ll	ll	ll	lm	lm	lm	ll	lm	lm	ll	lm	lm	lm	lm	lm	ll	lm	lm	lm	ll	lm
78	3648	44490	<lmxll>		8	48.919	0.555	RACA22	TCCTATTTTAATTACACAAAATATTGGGTATCCCTGAGTTTATTTCTCCCC	35	G	A	ll	ll	--	lm	ll	lm	ll	lm	lm	lm	ll	lm	lm	ll	ll	lm	ll	ll	ll	lm	lm	lm	ll	lm	lm	ll	lm	lm	lm	--	lm	ll	lm	lm	lm	ll	lm
79	3630	44179	<hkxhk>		8	49.283	0.364	RACA22	TGTAAAAGAGGAGTTCAAGGTGGAATTGATCATCTTTGAAGTGTTTCTTGT	42	G	C	hk	kk	--	hh	hk	hk	hk	hh	hh	hh	kk	hh	hh	hk	hk	hk	kk	hk	hk	hh	hk	hk	hk	hh	hh	hk	hh	hh	hh	hh	hk	kk	hh	hk	hk	kk	hh
80	3650	44529	<lmxll>		8	49.8	0.517	RACA22	ATAGTAAGATCATGACAGGTGTGGTTTTGTATTAGGAAGTCTGGAGTGACA	22	G	C	ll	ll	lm	lm	ll	lm	ll	lm	lm	lm	ll	lm	lm	ll	ll	lm	ll	ll	ll	lm	lm	lm	ll	lm	lm	ll	lm	lm	lm	lm	lm	ll	lm	lm	lm	ll	lm
81	3655	44590	<lmxll>		8	51.195	1.395	RACA22	CTGGTTTGTTTCTTTCTCTGATTTTCATCCGGTCCTTCATGGCCATGATTA	16	T	C	ll	ll	lm	lm	ll	lm	ll	lm	lm	lm	ll	lm	lm	ll	ll	lm	ll	ll	ll	lm	lm	lm	ll	lm	lm	ll	lm	lm	lm	lm	lm	ll	lm	lm	lm	ll	lm
82	3658	44627	<lmxll>		8	52.501	1.306	RACA22	TGTTTCAATAAATCAACCTCTGGCCATTGCGCTGGTTTATTCATGAGATGG	29	C	T	ll	ll	lm	lm	ll	lm	ll	lm	lm	lm	ll	lm	lm	ll	ll	lm	ll	ll	ll	lm	lm	lm	ll	lm	lm	ll	lm	lm	lm	lm	lm	ll	lm	lm	lm	ll	lm
83	3661	44676	<lmxll>		8	53.363	0.862	RACA22	AATACTCCAAAATTTCTTCTTGTGTGTTGATCATTAAGATAGACTTTTTTT	43	C	T	ll	ll	--	lm	ll	lm	ll	lm	lm	lm	ll	lm	lm	ll	ll	lm	ll	ll	ll	lm	lm	lm	ll	lm	lm	ll	lm	lm	--	lm	lm	ll	lm	lm	lm	ll	lm
84	1995	24463	<lmxll>		8	54.84	1.477	RACA4	GTGTTGAGTCCGTCATTAATCATGTCAGTGTTTGGACCAGACAGGAAAATA	17	A	G	lm	lm	ll	ll	lm	ll	lm	ll	ll	ll	lm	ll	ll	lm	lm	ll	lm	lm	lm	ll	ll	ll	lm	ll	ll	lm	ll	ll	ll	ll	lm	lm	ll	ll	ll	lm	ll
85	3669	44745	<lmxll>		8	55.045	0.205	RACA22	TCTGGTTCAGGTTAAAACTTTAGTAGGCTTCAGAATAAGCAGCAGTTTAAA	47	T	C	lm	lm	ll	ll	lm	ll	lm	ll	ll	ll	lm	ll	ll	lm	lm	ll	lm	lm	lm	ll	ll	ll	lm	ll	ll	lm	ll	ll	ll	ll	lm	lm	ll	ll	ll	lm	ll
86	5416	69414	<lmxll>		8	55.283	0.238	sc00327	TCAAGTGGGTCACAAACATACAGAACAAAGTAATTATTAATTATTTATGGT	29	G	A	ll	ll	lm	lm	ll	lm	ll	lm	lm	lm	ll	lm	lm	ll	ll	lm	ll	ll	ll	lm	lm	lm	ll	lm	lm	ll	lm	lm	lm	lm	ll	ll	lm	lm	lm	ll	lm
87	3672	44779	<lmxll>		8	55.302	0.019	RACA22	TAGCTCTTAATGAGACAAAAAATACTGACTTTCAGAAAAACTTAGAAAGGT	6	T	C	ll	ll	lm	lm	ll	lm	ll	lm	lm	lm	ll	lm	lm	ll	ll	lm	ll	ll	ll	lm	lm	lm	ll	lm	lm	ll	lm	lm	lm	lm	ll	ll	lm	lm	lm	ll	lm
88	3613	43939	<nnxnp>		8	56.28	0.978	RACA22	CTCTTTTTATTCAATAAAGCAGTTGAATAGTAGTAGACATTGTATTCATTT	11	T	C	nn	np	--	np	np	nn	np	np	np	np	nn	np	np	np	--	--	nn	np	nn	np	nn	nn	np	nn	np	np	np	np	--	np	nn	nn	np	nn	nn	nn	np
89	5418	69418	<lmxll>		8	56.636	0.356	sc00327	CTGGGAAAGAGGGAAGAATGAAGCCGTCAGCAGCACTTCTCAGCTGCTGCT	39	T	G	lm	lm	ll	ll	lm	ll	lm	ll	ll	ll	lm	ll	ll	lm	lm	ll	lm	lm	lm	ll	ll	ll	lm	ll	ll	lm	ll	ll	ll	ll	lm	lm	ll	ll	ll	lm	ll
90	3657	44615	<lmxll>		8	58.119	1.483	RACA22	ACAAACATATGAACCCTATAGAGTAGATTATTCACAGTTTCATTAACAACC	24	A	C	lm	lm	ll	ll	lm	ll	lm	ll	ll	ll	lm	ll	ll	lm	lm	ll	lm	lm	lm	ll	ll	ll	lm	ll	ll	lm	ll	ll	ll	ll	ll	lm	ll	ll	ll	lm	ll
91	3656	44604	<lmxll>		8	58.35	0.231	RACA22	TTAAATTCATAAGATTAAATTACTCACTATTAGAAATCAACATGTTGTAAC	10	A	C	lm	lm	--	ll	lm	ll	lm	ll	ll	ll	lm	ll	ll	lm	lm	ll	lm	lm	lm	ll	ll	ll	lm	ll	ll	lm	ll	ll	ll	ll	ll	lm	ll	ll	ll	lm	ll
92	3666	44704	<hkxhk>		8	59.474	1.124	RACA22	AGTACAGTACTAGTGGAATGAAACAGACCCTCTTCTTCCCCTCTTTATCGA	5	A	T	hh	hk	hk	hk	hh	kk	hk	hk	hk	kk	hk	hk	kk	hh	hk	kk	hk	hk	hh	hk	kk	hk	hh	hk	hk	hh	hk	hk	hk	hk	kk	hk	hk	kk	kk	hk	kk
93	3683	44874	<efxeg>		8	60.065	0.591	RACA22	CTGTTCCTGTTTGACCCTAATAAATGATCATCCATCACAGCCGGTTTCCTT	7	T	C	fg	ef	ee	eg	fg	ee	ef	eg	eg	ee	ef	eg	ee	fg	ef	ee	ef	ef	fg	eg	ee	eg	fg	eg	eg	fg	eg	eg	ee	eg	ef	ef	eg	ee	eg	ef	ee
94	3680	44855	<lmxll>		8	60.425	0.36	RACA22	GTGATCATCTAACTTGCACTGTGTACTGTGAAAATCAAGGTCATCCTACAT	35	C	T	lm	lm	--	ll	lm	ll	lm	ll	ll	ll	lm	ll	ll	lm	lm	ll	lm	lm	lm	ll	ll	ll	lm	ll	ll	lm	ll	ll	ll	ll	lm	lm	ll	ll	ll	lm	ll
95	3681	44858	<lmxll>		8	60.951	0.526	RACA22	ACAGTCAATCACTTGCCACAAACAACACTGACCAGATACAGGCATGTTACA	40	G	T	lm	lm	ll	ll	lm	ll	lm	ll	--	ll	lm	ll	ll	lm	lm	ll	lm	lm	lm	ll	ll	ll	lm	ll	ll	lm	ll	ll	ll	ll	lm	lm	ll	ll	ll	lm	ll
96	3682	44865	<nnxnp>		8	62.628	1.677	RACA22	GTTAAAGATGCTCGGGTGACCTGAGCTGCTCTCAATGTGGGTGAAAGAAAA	39	A	G	np	nn	np	np	np	nn	nn	np	np	nn	nn	np	nn	np	nn	nn	nn	nn	np	np	nn	np	np	np	np	np	np	np	nn	np	nn	nn	np	nn	np	nn	nn
97	3686	44903	<lmxll>		8	63.151	0.523	RACA22	NAATTCAGACATAGCCTTTGTCTCCTAGGACACCTGGAAGGGTTTACAGTG	25	T	C	lm	lm	--	ll	lm	ll	lm	ll	ll	--	lm	ll	ll	lm	lm	ll	lm	lm	lm	ll	ll	ll	lm	ll	ll	lm	ll	ll	ll	ll	lm	lm	ll	ll	ll	lm	ll
98	3663	44687	<nnxnp>		8	65.656	2.505	RACA22	TTGGTTTTATTCTAAAAAACTTTGAGAGTTTAATTAAGAGAGAAAGGTGTG	9	G	T	np	--	--	np	np	nn	nn	np	np	nn	nn	np	nn	np	nn	nn	nn	nn	np	np	nn	np	np	np	np	np	np	np	--	np	nn	nn	np	nn	nn	nn	nn
99	3696	45025	<nnxnp>		8	68.657	3.001	RACA22	GGTGTGTGGAAAAGAGATACTAAATGAAAATTTTGGAGGTAGATTTCTTAA	5	G	C	nn	np	nn	nn	nn	np	np	nn	np	np	np	nn	np	nn	np	np	np	np	nn	nn	np	nn	nn	nn	nn	nn	nn	nn	np	nn	np	np	nn	np	nn	np	np
100	4743	58943	<nnxnp>		8	69.689	1.032	RACA21	TAATTTTAAGACATTTAGGTTGTGGGATTTTGGTTAAAACTCCATAATCAG	34	A	T	nn	np	nn	nn	nn	np	np	nn	np	np	np	nn	np	nn	np	np	np	np	nn	--	np	nn	nn	nn	nn	nn	nn	nn	np	nn	np	np	nn	np	nn	np	np
101	5338	68130	<nnxnp>		8	69.865	0.176	sc00278	TCATGCTTCGCCCATTGCTCAAATCGGGTCGCGGGACTTCAGATCGCCCAA	29	C	G	nn	np	nn	nn	nn	np	np	nn	np	np	np	nn	np	--	np	np	np	np	nn	nn	np	nn	nn	nn	nn	nn	nn	nn	--	nn	np	np	nn	np	nn	np	np
102	4742	58942	<nnxnp>	4742	8	69.881	0.016	RACA21	CGGTCTGCGAGGCAAATACAATATTTTTTTGCATATCAGGAAATAAAAGGA	11	C	G	nn	np	nn	nn	nn	np	np	nn	np	np	np	nn	np	nn	np	np	np	np	nn	nn	np	nn	nn	nn	nn	nn	nn	nn	np	nn	np	np	nn	np	nn	np	np
103	4745	58955	<nnxnp>	4742	8	69.881	0	RACA21	GTTGCAAGAATGGACCAGAACAAAATTCAAGAATGAATGATTCATATGAAA	15	C	A	nn	np	nn	nn	nn	np	np	nn	np	np	np	nn	np	nn	np	np	np	np	nn	nn	np	nn	nn	nn	nn	nn	nn	nn	np	nn	np	np	nn	np	nn	np	np
104	4751	59038	<nnxnp>	4742	8	69.881	0	RACA21	CATCTTGTTACACTGTCACACTCAATGTGTATTTGTTTTCTAAGAAAAATA	41	A	G	nn	np	nn	nn	nn	np	np	nn	np	np	np	nn	np	nn	np	np	np	np	nn	nn	np	nn	nn	nn	nn	nn	nn	nn	np	nn	np	np	nn	np	nn	np	np
105	4755	59114	<nnxnp>	4742	8	69.881	0	RACA21	CCAAATCCAACTCTCTTACGCTCTCCGTTGACAATTCCTCAGTTACCTCCT	14	C	A	nn	np	nn	nn	nn	np	np	nn	np	np	np	nn	np	nn	np	np	np	np	nn	nn	np	nn	nn	nn	nn	nn	nn	nn	np	nn	np	np	nn	np	nn	np	np
106	5406	69252	<nnxnp>		8	69.97	0.089	sc00319	TTAAATTGATGTCCTAAAAAATAAAAAAATAAAAATTCAGTTTTTAATACT	12	C	T	nn	np	--	nn	nn	np	np	nn	np	np	np	nn	np	nn	np	--	np	np	nn	nn	np	nn	nn	--	nn	nn	nn	nn	--	nn	np	np	nn	np	nn	np	np
107	4746	58957	<nnxnp>		8	69.972	0.002	RACA21	GTAAGGGGTTCTGTAAGGTGAAGAAGAAGGGGTCATGTCATGAGTTTTTAT	14	C	A	nn	np	--	nn	nn	np	np	nn	np	np	np	nn	np	nn	np	np	np	np	nn	nn	np	nn	nn	--	nn	nn	nn	nn	--	--	np	np	nn	np	nn	np	np
108	5405	69248	<nnxnp>		8	70.034	0.062	sc00319	GTCAACATAAACCTTGACTAGAAAAAAATGTTAGAGTAAACCTACAATTGA	47	G	T	nn	np	--	nn	nn	np	np	nn	np	np	np	nn	np	nn	np	np	np	np	nn	nn	np	nn	nn	nn	nn	nn	nn	--	nn	nn	np	np	nn	np	nn	np	np
109	4757	59151	<nnxnp>		8	70.15	0.116	RACA21	GCACTATAAACTTTCATTAAAAAAAAAACCTATATGACCCTTAACAGGTTT	27	A	G	nn	np	--	nn	nn	np	np	nn	np	np	np	nn	np	nn	np	np	np	np	nn	nn	np	nn	nn	nn	--	nn	nn	nn	--	nn	np	np	nn	np	nn	np	np
110	4758	59168	<nnxnp>		8	70.16	0.01	RACA21	NNNAAGAGTTTCTGTTCTCTGGCCTTTATAAAACACTTAAAACTCTGCACT	6	G	A	nn	np	--	nn	nn	np	np	nn	np	np	np	nn	np	nn	np	np	np	np	nn	nn	np	nn	nn	nn	nn	nn	nn	nn	--	nn	np	np	nn	np	nn	np	np
111	4753	59050	<nnxnp>		8	70.196	0.036	RACA21	CTTATACAGTCAATGGGGAAAGTCTACTGAAATTATTTATGATAAATAACT	26	T	C	nn	np	--	nn	nn	np	np	nn	np	np	np	nn	np	nn	np	np	np	np	nn	nn	np	nn	nn	nn	nn	nn	nn	--	np	nn	--	np	nn	np	--	np	np
112	4759	59174	<nnxnp>		8	70.383	0.187	RACA21	AAAGCTTCTGTTTCCAAAATCTCCTCTGAGGGGCGTGGCTTTTGGAGCTGA	37	G	A	nn	np	nn	nn	nn	np	np	nn	np	np	np	nn	np	nn	np	np	np	np	nn	nn	np	nn	nn	nn	nn	nn	nn	nn	np	nn	np	np	nn	np	nn	np	np
113	5175	65113	<nnxnp>		8	70.884	0.501	sc00191	CCGTTTACTCCCTCTCTCCCTAGCTTACAGATTCCTCACACCCTCTAAATT	10	C	T	nn	np	nn	nn	--	np	np	nn	np	np	np	nn	np	nn	np	np	np	np	nn	nn	np	nn	nn	nn	nn	nn	nn	nn	np	nn	np	np	nn	np	nn	np	np
114	4741	58930	<nnxnp>	4741	8	70.885	0.001	RACA21	GACCGTGGGGTCAAGATGATCACAAGAATGTTGAGTAAAATTCCCAGAACC	14	A	G	nn	np	nn	nn	nn	np	np	nn	np	np	np	nn	np	nn	np	np	np	np	nn	nn	np	nn	nn	nn	nn	nn	nn	nn	np	nn	np	np	nn	np	nn	np	np
115	4760	59176	<nnxnp>	4741	8	70.885	0	RACA21	ATTGTGAGCTGAGCTCTGTAAAGCAGCAGCAGGACGCGTGTCGCCAAACAT	35	G	A	nn	np	nn	nn	nn	np	np	nn	np	np	np	nn	np	nn	np	np	np	np	nn	nn	np	nn	nn	nn	nn	nn	nn	nn	np	nn	np	np	nn	np	nn	np	np
116	4747	58979	<nnxnp>		8	70.986	0.101	RACA21	GCTCAGATAATACACATTCTGTCGTCTGTCACAAAGTTGTGATTCAGCAGC	4	G	A	nn	np	nn	nn	nn	np	np	nn	np	np	np	nn	np	nn	np	np	np	np	nn	nn	np	nn	nn	nn	nn	nn	nn	nn	np	nn	np	np	nn	np	nn	np	np
117	4749	58992	<nnxnp>		8	71.012	0.026	RACA21	GCAGACCCCTGTGACTAAAGAGACTGTTGAGGAGTCTGTGGGCCATAAAGA	6	T	C	nn	np	--	nn	nn	np	np	nn	np	np	np	nn	np	nn	np	np	np	np	nn	nn	np	nn	nn	nn	nn	nn	nn	nn	np	nn	np	np	nn	np	nn	np	np
118	4754	59111	<nnxnp>		8	72.038	1.026	RACA21	CTAAGACATAAAGAGCAAATATAATTTTTAGTTTTCAAAAAAGCTGAAAAG	27	T	A	nn	np	nn	nn	nn	np	np	nn	np	np	np	nn	np	nn	np	--	np	np	--	nn	np	nn	nn	nn	nn	nn	nn	nn	--	nn	np	np	nn	np	nn	np	np
119	5332	68016	<nnxnp>		8	72.394	0.356	sc00276	CCTCGGGCTGTGGGACCACATGGTTGGGGGGGCTCTGGGGAAAACATCAGC	4	G	T	nn	np	nn	nn	nn	np	np	nn	np	np	np	nn	np	nn	np	np	np	np	nn	nn	np	nn	nn	nn	nn	nn	nn	nn	--	nn	np	np	nn	np	nn	np	np
120	3689	44973	<nnxnp>		8	75.128	2.734	RACA22	TCTTCATGAGAGGAAAAATAAAGCATATGGAGGATATTTTCTAATGCAAAN	10	A	T	np	--	np	np	np	nn	nn	np	nn	nn	nn	np	nn	np	nn	nn	nn	nn	np	np	nn	np	np	np	np	np	np	np	nn	np	nn	nn	np	nn	np	nn	nn
121	3660	44666	<nnxnp>		8	76.423	1.295	RACA22	GCTTTCTTGAGCGACAATCACCATGCAACTCTGATGTATTGATTACAGAAA	17	T	C	nn	np	--	nn	nn	np	np	nn	nn	np	np	--	np	nn	np	np	np	np	nn	nn	np	nn	nn	nn	nn	nn	nn	nn	nn	nn	np	np	nn	np	np	np	np
122	3677	44805	<nnxnp>		8	77.544	1.121	RACA22	GATTATTTTGAAAGGCCCGGTGTGATTTGAAGCACGGAGGAGGCAGAAGCT	18	T	G	nn	np	--	nn	nn	np	np	nn	nn	np	np	nn	np	nn	np	np	np	np	nn	nn	np	nn	nn	nn	nn	nn	nn	nn	--	nn	np	np	nn	np	np	np	np
123	3662	44682	<nnxnp>		8	78.25	0.706	RACA22	ACTCTAGCTGATTTACAGACTTAAAACTGCAAGAAAGTAAAGTTTCTATTA	38	G	A	nn	np	--	nn	nn	np	np	nn	nn	np	np	nn	np	nn	np	np	np	np	nn	nn	np	nn	nn	nn	nn	nn	nn	nn	nn	nn	np	np	nn	np	np	np	np
1	2036	24945	<lmxll>		9	0		RACA4	TTGTTCTTCAGAAGCAGCAGAGGAACCCCAACTGGAAACAGAAGCGCTGAC	32	T	G	ll	--	--	ll	ll	ll	ll	lm	lm	ll	lm	lm	ll	lm	lm	ll	lm	lm	ll	lm	lm	lm	lm	--	lm	ll	ll	lm	--	lm	lm	ll	ll	lm	lm	ll	ll
2	2041	25087	<lmxll>		9	1.566	1.566	RACA4	GGAACAGAAATCCTTCGATCCGCTCAAACACTCCGTGGGTTTAAATCCAGG	10	T	C	lm	lm	--	lm	lm	lm	lm	ll	ll	lm	ll	ll	lm	lm	ll	lm	ll	ll	lm	ll	ll	ll	ll	lm	--	lm	lm	ll	--	--	ll	lm	lm	ll	ll	lm	lm
3	1906	23252	<lmxll>		9	2.645	1.079	RACA4	CTCAGGTGGAGCTGAAAGAAGTTCATGTTTGATCTCAGGAAGGAATCCGGT	9	A	T	lm	lm	ll	lm	lm	lm	lm	ll	--	lm	ll	ll	lm	lm	ll	lm	ll	ll	lm	ll	ll	ll	ll	lm	ll	lm	lm	ll	ll	ll	ll	lm	lm	ll	ll	ll	lm
4	1923	23430	<lmxll>		9	2.718	0.073	RACA4	CATTACAGCCTGAAACCGACCCCCCCACAGCACACAACACAAACGGAGACG	42	A	G	lm	lm	--	lm	lm	lm	lm	ll	ll	lm	ll	ll	lm	lm	ll	lm	ll	ll	lm	ll	ll	ll	ll	lm	ll	lm	lm	ll	--	ll	ll	lm	lm	ll	ll	ll	lm
5	2031	24902	<lmxll>		9	3.238	0.52	RACA4	CATAGTACCTTACCAACCAATCAGAACACTTCGCTTGTGGTTCCTAGAATT	6	A	G	lm	lm	--	lm	lm	lm	lm	ll	ll	lm	ll	ll	lm	lm	ll	ll	ll	ll	lm	ll	ll	ll	ll	--	ll	lm	--	ll	--	ll	ll	lm	lm	ll	ll	ll	lm
6	2007	24590	<lmxll>		9	3.654	0.416	RACA4	NAATTCATCTGACTCGTTGAAGTTCCACTTCCTGTCAGGGAAACGCCTGCA	14	C	T	lm	lm	--	lm	lm	lm	lm	ll	ll	lm	ll	ll	lm	lm	ll	ll	ll	ll	lm	ll	ll	ll	ll	lm	ll	--	lm	ll	--	ll	ll	lm	lm	ll	ll	ll	lm
7	1935	23717	<lmxll>		9	4.009	0.355	RACA4	TCGGATTATAAAAACGGTTTAGATTTAAACGACAGAACTGCTCACTGCTGC	30	G	A	lm	lm	--	lm	lm	lm	lm	ll	ll	lm	ll	--	lm	lm	ll	lm	ll	ll	lm	ll	ll	ll	ll	lm	ll	lm	lm	ll	ll	ll	ll	lm	lm	ll	ll	ll	lm
8	2035	24939	<lmxll>		9	4.611	0.602	RACA4	CTGAGCTCGCCGCCAAAGCGGAGCGGTCCGATGAGGAGGTGAACGGTCTCT	29	G	A	ll	ll	--	ll	ll	ll	ll	lm	lm	ll	lm	lm	ll	ll	lm	ll	lm	lm	ll	lm	lm	lm	lm	ll	lm	ll	ll	lm	lm	lm	lm	ll	ll	lm	lm	ll	ll
9	2037	24946	<lmxll>		9	4.682	0.071	RACA4	TCTTGGATCTGAGGCTGTTTGTCTTCTGACTCTGCTTCCTCACAAACTGAC	11	A	T	--	ll	--	ll	ll	ll	ll	lm	--	ll	lm	lm	ll	ll	lm	ll	lm	lm	ll	lm	lm	lm	lm	ll	lm	ll	ll	lm	lm	lm	lm	ll	ll	lm	lm	ll	ll
10	2050	25212	<lmxll>		9	4.88	0.198	RACA4	GCAGAGTTTTAATCAAAAAACTCACTCGAAAAGGAAAAAGATTCCAGCAGC	24	C	T	ll	ll	--	ll	ll	ll	ll	lm	lm	ll	lm	lm	ll	ll	lm	ll	lm	lm	ll	lm	lm	lm	lm	ll	lm	ll	ll	lm	--	lm	lm	ll	ll	lm	lm	ll	ll
11	2086	25622	<lmxll>		9	5.649	0.769	RACA4	TAAATGTGGTAAAAAAAAATCAAATTTGTCCTCAATTGTTGGCCTTTTATT	14	A	G	--	ll	--	ll	ll	ll	ll	lm	lm	ll	lm	lm	ll	ll	lm	--	lm	lm	ll	lm	lm	lm	lm	ll	lm	lm	ll	lm	lm	lm	lm	ll	ll	lm	lm	ll	ll
12	1917	23382	<lmxll>		9	6.11	0.461	RACA4	GACAGATACTGCAGAGAAAAACGTTGTTGAAGGATCCAGTGGCTGCAGCCC	39	T	A	ll	ll	lm	ll	ll	ll	ll	lm	lm	ll	lm	lm	ll	ll	lm	ll	lm	lm	ll	lm	lm	lm	lm	ll	lm	ll	ll	lm	lm	lm	lm	ll	ll	lm	lm	lm	ll
13	2033	24915	<lmxll>		9	9.433	3.323	RACA4	TAAAAACACTCAAACTAGATGAGTTGTATTCTCCTGAATCGGAGGATAATG	15	T	C	ll	ll	lm	ll	ll	ll	ll	lm	lm	ll	lm	lm	ll	ll	lm	lm	lm	lm	ll	lm	lm	lm	lm	ll	lm	ll	ll	lm	lm	lm	lm	ll	ll	lm	lm	lm	ll
14	2032	24903	<lmxll>		9	10.407	0.974	RACA4	CGTAATGTTGCTTCTTTTCTGTGGTCTTAACTTTGTAAATTTACAAGAAAA	46	G	A	ll	ll	lm	ll	ll	ll	ll	lm	lm	ll	lm	lm	ll	ll	lm	lm	lm	lm	ll	lm	lm	lm	lm	ll	lm	ll	ll	lm	lm	lm	lm	ll	ll	lm	lm	lm	ll
15	1992	24413	<lmxll>		9	10.42	0.013	RACA4	TCTGGTTCAGAGGAACAGAGCTCAACCAGCTGATGATCAGCTGTTCTCACG	16	A	G	ll	ll	lm	ll	ll	ll	ll	lm	lm	ll	lm	lm	ll	ll	lm	lm	lm	lm	ll	lm	lm	lm	lm	ll	lm	ll	ll	lm	lm	lm	lm	ll	ll	lm	lm	lm	ll
16	2001	24551	<lmxll>		9	11.588	1.168	RACA4	GAGTCACTTGTTTTTATGTTGGAGGTTGATTAATTCTTCCATGAAGACACT	23	G	T	lm	lm	--	lm	lm	lm	lm	ll	ll	lm	ll	ll	lm	lm	ll	ll	ll	ll	lm	ll	ll	ll	ll	--	ll	lm	lm	ll	--	ll	ll	lm	lm	ll	ll	ll	lm
17	1930	23680	<lmxll>		9	13.566	1.978	RACA4	TTATGTGGCTTCAGCCTCCAGGGATCCAGCTGGATTTCAGGTGTTCTGTTC	28	G	C	ll	ll	--	ll	ll	ll	ll	lm	lm	ll	lm	lm	ll	ll	lm	ll	lm	lm	ll	lm	lm	lm	lm	ll	lm	ll	ll	lm	--	lm	lm	ll	ll	lm	lm	lm	ll
18	2039	24988	<lmxll>		9	15.393	1.827	RACA4	ATTAGAGCTCTTTCCTCTGACTGCAAAGGAATGTTAATATTTTGGATGACT	10	T	C	ll	ll	--	--	ll	ll	ll	lm	lm	ll	lm	lm	ll	ll	lm	lm	lm	lm	ll	lm	ll	lm	lm	ll	lm	ll	--	lm	--	lm	lm	ll	ll	lm	lm	lm	ll
19	2043	25106	<nnxnp>		9	17.376	1.983	RACA4	GTCATGCTGATAAATATGTCTGTGAGTCAGCATGCACAGTTGTTTGTCTCG	5	G	A	np	nn	--	np	nn	nn	np	nn	nn	nn	np	nn	nn	nn	nn	--	np	nn	nn	np	np	np	nn	np	nn	np	nn	nn	--	np	np	nn	np	np	nn	nn	np
20	2044	25123	<nnxnp>		9	18.912	1.536	RACA4	GATCAGAATTGAAGAAGTTTGTAGATTTGGAGAGCTGCTTGTTTCTGTACT	16	G	T	np	nn	nn	np	nn	nn	np	nn	nn	nn	np	nn	nn	np	nn	np	np	nn	nn	np	np	np	nn	np	nn	np	nn	nn	np	np	np	nn	np	np	nn	nn	np
21	2047	25153	<hkxhk>		9	19.012	0.1	RACA4	GTATCAGCTCCTTTTAAGCAGACAGCCATCCAAATCAATTGTGGCAACTTT	14	T	C	hh	kk	--	hk	kk	hk	hk	hk	hk	kk	hh	hk	kk	hk	hk	hh	hh	hk	kk	hh	hk	hh	--	hk	hk	hk	kk	hk	--	hh	hh	kk	hk	hh	hk	hk	hk
22	2046	25151	<hkxhk>		9	21.284	2.272	RACA4	CATCAGCTGATTATGTTCATACCAATAACATACTTTATGTTGCTTTATTTC	5	G	A	hh	kk	hk	hk	kk	hk	hk	hk	hk	kk	hh	hk	kk	hk	hk	hh	hh	hk	kk	hh	hk	hh	hk	hk	hk	hk	kk	hk	hh	hh	hh	kk	hk	hh	hk	hk	hk
23	2058	25303	<nnxnp>		9	21.391	0.107	RACA4	CATGAAGGTAGTCTTGAACTTCCTCCCTGTAAAGGATTTATCTGTTTTTAT	16	A	G	nn	np	np	nn	np	np	nn	np	np	np	nn	np	np	nn	np	nn	nn	np	np	nn	nn	nn	np	nn	np	nn	np	np	--	nn	nn	np	nn	nn	np	np	nn
24	2054	25243	<lmxll>		9	24.022	2.631	RACA4	CAGCTGGTGAGGTATAACTATACGGTCGATGACCTGAAATGAGATAGGACC	38	A	G	lm	ll	lm	ll	ll	lm	lm	lm	lm	ll	lm	lm	ll	ll	lm	lm	lm	lm	ll	lm	ll	lm	lm	ll	lm	ll	ll	lm	lm	lm	lm	ll	lm	lm	lm	lm	ll
25	2055	25252	<nnxnp>		9	24.115	0.093	RACA4	TTGTTTCAGGAAAAAAAATATTTTCCTGTCTTGCAAGAACAATATTCTTAT	24	C	T	nn	np	--	nn	np	np	nn	np	np	np	nn	np	np	nn	np	nn	nn	np	np	nn	nn	nn	np	nn	np	nn	np	np	nn	nn	nn	np	nn	nn	np	np	nn
26	2062	25361	<lmxll>		9	25.501	1.386	RACA4	CACTAACAAGACTTTCAATCTAGTTCTGCTTTTCGTAATGGTTTTGGAAAG	15	C	G	ll	lm	ll	lm	lm	ll	ll	ll	ll	lm	ll	ll	lm	lm	ll	ll	ll	ll	lm	ll	lm	ll	ll	lm	ll	lm	lm	ll	ll	ll	ll	lm	ll	ll	ll	ll	lm
27	2049	25175	<nnxnp>		9	25.581	0.08	RACA4	TGCTCTCCTTTGACCAGAGCCCCTTCTTCCTTAATCATGAAGGTGTTCGTT	19	C	T	np	nn	nn	np	nn	nn	np	nn	nn	nn	np	nn	nn	np	nn	np	np	nn	nn	np	np	np	nn	np	nn	np	nn	nn	np	np	np	nn	np	np	nn	nn	np
28	2060	25352	<lmxll>		9	26.311	0.73	RACA4	CCACTCTGTTTTGGGTGTTCTTTATTTTTTTGATGTGCTGGCTGTCCCCAT	37	C	A	ll	lm	ll	lm	lm	ll	ll	ll	ll	lm	ll	ll	lm	lm	ll	ll	ll	ll	lm	ll	lm	ll	ll	lm	ll	lm	lm	ll	ll	ll	ll	lm	ll	ll	ll	ll	lm
29	2063	25369	<lmxll>		9	27.133	0.822	RACA4	TCTGTCTAGTTTATGTATTCCTACTTTAAATCCTTCCAGAAGACTGAGGAT	6	T	C	ll	lm	--	lm	lm	ll	ll	ll	ll	lm	ll	ll	--	lm	ll	ll	ll	ll	lm	ll	lm	ll	ll	lm	ll	lm	lm	ll	ll	ll	ll	lm	ll	ll	ll	ll	lm
30	2066	25372	<abxcd>		9	27.287	0.154	RACA4	TTCCAACCACAAACGAGTCAGGTAAACTGTTCTACCTGCAAGTTTCTAACT	13	C	T	bd	ac	bc	ad	ac	bc	bd	bc	bc	ac	bd	bc	--	ad	bc	bd	bd	bc	ac	bd	ad	bd	bc	ad	bc	ad	ac	bc	bd	bd	bd	ac	bd	bd	bc	bc	ad
31	2061	25355	<nnxnp>		9	27.388	0.101	RACA4	ACTTATTACACTCGTTTTTATATCCCTGTAATTAAAATGAAATACAACTGG	8	C	A	nn	np	np	nn	np	np	nn	np	np	np	nn	np	np	nn	np	nn	nn	np	np	nn	nn	nn	np	nn	np	nn	np	np	nn	nn	nn	np	nn	nn	np	np	nn
32	2069	25414	<nnxnp>		9	27.579	0.191	RACA4	TGCATGGAGCCCCAGTCCTAGTCATGTTTAGCTTTTTCCATTTTCTAATAA	8	G	C	nn	np	np	nn	np	np	nn	np	np	np	nn	np	np	nn	np	nn	nn	np	np	nn	nn	nn	np	nn	np	nn	np	np	nn	nn	nn	np	nn	nn	np	np	nn
33	2051	25218	<nnxnp>		9	29.429	1.85	RACA4	TTCTCGACTCTCGGAGTAGAGCTGCTACTCCACCATACCGAGAGGAGCCAG	38	T	C	nn	np	np	--	np	np	nn	np	np	np	nn	np	np	nn	np	nn	nn	np	np	nn	nn	nn	np	nn	np	nn	np	np	nn	nn	nn	np	nn	nn	np	np	--
34	2053	25240	<lmxll>		9	29.525	0.096	RACA4	GAAATGTTGATTAAAGATACAATTCAACTCTAAGAATGATACATCAGCTTG	41	C	A	lm	ll	lm	ll	ll	lm	lm	lm	lm	ll	lm	lm	ll	ll	lm	lm	lm	lm	ll	lm	ll	lm	lm	ll	lm	ll	ll	lm	lm	lm	lm	ll	lm	lm	lm	lm	ll
35	2052	25226	<nnxnp>		9	30.435	0.91	RACA4	ATGTTTTACATCCACTTTGTGCATGACTCGATTAGCTGATAATTGTTGATT	5	T	A	nn	np	--	nn	np	np	--	np	np	np	nn	np	np	nn	np	nn	nn	np	np	nn	nn	nn	np	nn	np	nn	np	np	nn	nn	nn	np	nn	nn	np	np	nn
36	2056	25264	<nnxnp>		9	32.981	2.546	RACA4	GGTTACCTAACAGGTGAGATTTAGGGGGGGCTCTCTACTTCTTTCCTAACA	6	C	T	nn	np	np	nn	np	np	nn	np	np	np	nn	np	np	nn	np	nn	nn	np	np	nn	nn	nn	np	nn	np	nn	np	np	nn	nn	nn	np	nn	nn	np	np	nn
37	2067	25383	<nnxnp>		9	34.898	1.917	RACA4	GCCGCCCGTGTCCGGGTCCATCATCTGGGCGAAGCAGATCGACCGTCAGCT	12	T	C	np	nn	--	np	nn	nn	np	nn	nn	nn	np	nn	nn	np	nn	np	np	nn	nn	np	np	np	nn	np	nn	np	nn	nn	--	--	np	nn	np	np	nn	nn	np
38	2073	25457	<nnxnp>		9	35.407	0.509	RACA4	GAGACCTGCTGAGGAGTGATGACAGCTGTCATGGCTCCGCGATAAAGTCAA	42	A	T	np	nn	nn	np	nn	nn	np	nn	nn	nn	np	nn	nn	np	nn	np	np	nn	nn	np	np	np	nn	np	nn	np	nn	nn	np	np	np	np	np	np	nn	nn	np
39	2042	25104	<nnxnp>		9	37.961	2.554	RACA4	TTAAATTAATGCAAAAAAGGGAAATTCAACTTTGTTACTCAACAAATAGTC	13	G	A	np	nn	nn	np	nn	nn	np	nn	nn	nn	np	nn	nn	nn	nn	np	np	nn	nn	np	np	np	nn	np	nn	np	nn	nn	np	np	np	nn	np	np	nn	nn	np
40	1911	23356	<lmxll>		9	38.283	0.322	RACA4	CCTTCTTGGGTTTCCGGGTAGAATGAGTCCCTGAACTCCGACTCGTTCTCC	20	G	A	lm	lm	--	ll	ll	lm	lm	lm	lm	ll	lm	lm	lm	--	lm	lm	lm	lm	ll	lm	ll	ll	lm	ll	lm	lm	ll	lm	ll	lm	ll	ll	lm	lm	lm	lm	--
41	1910	23349	<lmxll>	1910	9	39.956	1.673	RACA4	TTTTCCTTTCTTTTTTTAATGTCTCAGTGAGGCCCAAACTGGCGGCTCTTG	5	C	T	lm	lm	lm	ll	ll	lm	lm	lm	lm	ll	lm	lm	lm	ll	lm	lm	lm	lm	ll	lm	ll	ll	lm	ll	lm	ll	ll	lm	ll	lm	ll	ll	lm	lm	lm	lm	ll
42	1920	23410	<lmxll>	1910	9	39.956	0	RACA4	ATGTATGTCTTTGTTTTCTTTGTCCGAGCTGGTATCTGGCTCAAAACTGTT	45	A	G	lm	lm	lm	ll	ll	lm	lm	lm	lm	ll	lm	lm	lm	ll	lm	lm	lm	lm	ll	lm	ll	ll	lm	ll	lm	ll	ll	lm	ll	lm	ll	ll	lm	lm	lm	lm	ll
43	1925	23453	<lmxll>		9	41.202	1.246	RACA4	ACTTCAACAAGAAATCCTTGCCAAAGCCATCCCCACCACCTGCACAGCAGA	19	G	T	lm	lm	lm	ll	ll	lm	lm	lm	lm	ll	lm	lm	lm	ll	lm	lm	lm	lm	ll	lm	ll	ll	lm	ll	lm	--	ll	lm	--	lm	--	ll	lm	lm	lm	lm	ll
44	1903	23180	<lmxll>		9	42.746	1.544	RACA4	GCACATGAGCCGTCTCAAGCAGGACTACTTTGGAAGTACTGCAAGATGTTA	11	G	A	lm	lm	lm	ll	ll	lm	lm	lm	lm	ll	lm	lm	lm	ll	lm	lm	lm	lm	ll	lm	ll	ll	lm	ll	lm	ll	ll	lm	ll	lm	ll	ll	lm	lm	lm	lm	ll
45	2075	25530	<lmxll>		9	44.738	1.992	RACA4	GCATCGGCACAACGATTACTGCATATTTTTGCCACAGAAAACATGCCAGTG	12	C	A	lm	ll	lm	ll	ll	lm	lm	lm	lm	ll	lm	lm	lm	ll	lm	lm	lm	lm	ll	lm	ll	ll	lm	ll	lm	ll	ll	lm	--	lm	ll	ll	lm	lm	lm	lm	ll
46	1900	23048	<lmxll>		9	47.191	2.453	RACA4	NAATTCAATTCCAAATGGATCTTCATCTCTGAGCCTGTTGGGGGCGTATTC	8	T	A	--	--	lm	ll	ll	lm	lm	lm	lm	ll	lm	lm	lm	ll	lm	lm	lm	lm	ll	lm	ll	ll	lm	ll	lm	ll	ll	lm	--	lm	ll	ll	lm	lm	lm	lm	ll
47	1902	23110	<lmxll>		9	47.291	0.1	RACA4	TGCATCCCTGTACTTCGTTGCTGTGACGTCATCAATGTGCGACTGCAATTG	10	T	A	lm	lm	lm	ll	ll	lm	lm	lm	lm	ll	lm	lm	lm	ll	lm	lm	lm	lm	ll	lm	ll	ll	lm	ll	lm	ll	ll	lm	ll	lm	ll	ll	lm	lm	lm	lm	ll
48	2079	25579	<lmxll>		9	47.296	0.005	RACA4	GCACCTATAATTCTATTCAAACGCACATCCTGAACGTGTTTTTAGCCCACT	21	C	T	lm	lm	lm	ll	ll	lm	lm	lm	lm	ll	lm	lm	lm	ll	lm	lm	lm	lm	ll	lm	ll	ll	lm	ll	lm	ll	ll	lm	--	lm	ll	ll	lm	lm	lm	lm	ll
49	2080	25580	<lmxll>		9	47.341	0.045	RACA4	NAATTCTTTCACATAAGTGTTTTGTAATCATTTATACATTTACATTTTAGA	37	A	G	lm	lm	--	ll	ll	lm	lm	lm	lm	ll	lm	lm	lm	ll	lm	--	lm	lm	ll	lm	ll	ll	lm	ll	lm	ll	ll	lm	--	lm	ll	ll	lm	lm	lm	lm	ll
50	2084	25614	<lmxll>		9	47.375	0.034	RACA4	CTCATTTTTCCAGATCATTTCGGATTTTTTGCTTCCACTTGATGAACAAAA	20	C	T	lm	lm	lm	ll	ll	lm	lm	lm	lm	ll	lm	lm	lm	ll	lm	lm	lm	lm	ll	lm	ll	ll	lm	ll	lm	ll	ll	lm	ll	lm	ll	ll	lm	lm	lm	lm	ll
51	1922	23425	<hkxhk>		9	47.507	0.132	RACA4	GTCATTCCCTAAATAGAATTGGGGAGAAAAAAAAAACTTAATTTATAGAAA	21	G	A	hk	hk	hk	hk	hh	hk	hk	hk	hk	hk	kk	hk	hk	hk	kk	kk	kk	hk	hk	kk	hh	hk	hk	hk	kk	hk	hh	hk	hh	kk	hk	hk	kk	kk	hk	hk	hk
52	2081	25589	<lmxll>	2081	9	47.629	0.122	RACA4	AAATAAGCCATATCTAACAGAATGAGCTTTATTGTGATGCCTCACGATGAT	16	A	G	lm	lm	lm	ll	ll	lm	lm	lm	lm	ll	lm	lm	lm	ll	lm	lm	lm	lm	ll	lm	ll	ll	lm	ll	lm	ll	ll	lm	ll	lm	ll	ll	lm	lm	lm	lm	ll
53	2085	25615	<lmxll>	2081	9	47.629	0	RACA4	CAACGACCTATAAAAAAGCAAAACGAAGAATAAAAAAAATGTATTTTAGAA	40	G	T	lm	lm	lm	ll	ll	lm	lm	lm	lm	ll	lm	lm	lm	ll	lm	lm	lm	lm	ll	lm	ll	ll	lm	ll	lm	ll	ll	lm	ll	lm	ll	ll	lm	lm	lm	lm	ll
54	2077	25562	<lmxll>		9	47.648	0.019	RACA4	TAGTGGAAACAAGTTGGGAGAGGTACAAACAGCGTGTGAACACACAGTGTG	34	T	G	lm	lm	lm	ll	ll	lm	lm	lm	lm	ll	lm	lm	lm	ll	lm	lm	lm	lm	ll	lm	ll	ll	lm	ll	lm	ll	ll	lm	ll	lm	ll	--	lm	lm	lm	lm	ll
55	1909	23286	<hkxhk>		9	48.194	0.546	RACA4	GGCACAGACCGTCAGCTGCTTTTCCTCTCCTCAGCAGTCGACTGTCATGAT	7	A	G	hk	hk	hk	hk	kk	hk	hk	hk	hk	hk	hh	hk	hk	hk	hh	hh	hh	hk	hk	hh	kk	hk	hk	hk	hh	hk	kk	hk	kk	hh	hk	hk	hh	hh	hk	hk	hk
56	1916	23376	<lmxll>		9	49.166	0.972	RACA4	GGCGGATGGCAAGAGTAAAGTCTAGATAACATCACAAATTAACAAGAATAC	42	C	A	lm	lm	lm	ll	ll	lm	lm	lm	lm	ll	lm	lm	lm	ll	lm	lm	lm	lm	ll	lm	ll	ll	lm	ll	lm	ll	ll	lm	ll	lm	ll	ll	lm	lm	lm	lm	ll
57	1990	24388	<hkxhk>		9	60.985	11.819	RACA4	GGAGATGAAATCCTGATCTTAGCTTGTCAGCCTTTAGGGGGCAACAACTCT	35	A	T	hh	hh	hk	kk	hk	hh	hh	hk	hh	kk	hh	hh	hh	kk	kk	hh	hh	hk	kk	kk	hk	hk	hk	hk	hk	kk	hk	hk	hk	hh	kk	hk	hh	hk	kk	hh	kk
58	1977	24183	<lmxll>		9	62.029	1.044	RACA4	AAAGTTTTGGACTAAATATCAATACAGTGAAATCAATGGAACCAATGATTG	44	A	C	lm	lm	lm	ll	--	lm	lm	lm	lm	ll	lm	lm	lm	ll	ll	lm	lm	lm	ll	ll	ll	ll	lm	lm	lm	ll	ll	lm	ll	lm	ll	ll	lm	lm	ll	lm	ll
59	1972	24151	<lmxll>	1972	9	62.671	0.642	RACA4	TGACCAAAACACTCTTGCTGGCCATCTGCTTGAGAATTTAAACCTGAACTC	21	C	T	lm	lm	lm	ll	ll	lm	lm	lm	lm	ll	lm	lm	lm	ll	ll	lm	lm	lm	ll	ll	ll	ll	lm	lm	lm	ll	ll	lm	ll	lm	ll	ll	lm	lm	ll	lm	ll
60	1976	24179	<lmxll>	1972	9	62.671	0	RACA4	TTAGTCACATGGGTTTGTTTACAGGTTTTAGTTTGAAACAAAAATGTCTGG	20	A	G	lm	lm	lm	ll	ll	lm	lm	lm	lm	ll	lm	lm	lm	ll	ll	lm	lm	lm	ll	ll	ll	ll	lm	lm	lm	ll	ll	lm	ll	lm	ll	ll	lm	lm	ll	lm	ll
61	1974	24162	<hkxhk>		9	63.27	0.599	RACA4	GGTCCTTCCGCCGTTCCTCGTTGAATTTGTCTAAGCCCCGGTTAGCCATGT	9	G	T	kk	kk	kk	hh	hk	kk	kk	hk	kk	hh	kk	kk	kk	hh	hh	kk	kk	hk	hh	hh	hk	hk	hk	hk	hk	hh	hk	hk	hk	kk	hh	hk	kk	hk	hh	kk	hh
62	1973	24156	<lmxll>		9	63.289	0.019	RACA4	GAATCGATCTAAGCTTAATAAACCAATAATCACTCAATAAAAATAAAAATC	37	T	C	lm	lm	lm	ll	ll	lm	lm	lm	lm	ll	lm	lm	lm	ll	ll	lm	lm	lm	ll	ll	ll	ll	lm	lm	lm	ll	ll	lm	ll	--	ll	ll	lm	lm	ll	lm	ll
63	1971	24149	<efxeg>		9	63.629	0.34	RACA4	ATAGAACAAAAAAATCATTAAACAACACAAGAAAGCTACATATTTAATATA	9	A	C	fg	fg	--	ee	eg	fg	fg	ef	fg	ee	fg	fg	fg	ee	ee	fg	fg	ef	ee	ee	eg	eg	ef	ef	ef	ee	--	ef	eg	fg	ee	eg	fg	ef	ee	fg	ee
64	1968	24125	<nnxnp>		9	63.971	0.342	RACA4	TCATCGCTGATGGCTGATATTTCTCAGCAAAAATATTGATGCAAAGTCGCA	4	C	T	np	np	np	nn	np	np	np	nn	np	nn	np	np	np	nn	nn	np	np	--	nn	nn	np	np	nn	nn	nn	nn	np	nn	np	np	nn	np	np	nn	nn	np	nn
65	1969	24127	<nnxnp>		9	63.991	0.02	RACA4	CAAATCCTCAAAACCATGGTCTGTCAGTACTGTCTAACAAGTATACCCAAC	43	T	G	np	np	--	nn	np	np	np	nn	np	nn	np	np	np	nn	nn	np	np	nn	nn	nn	np	np	nn	nn	nn	nn	np	nn	np	np	nn	np	np	nn	nn	np	nn
66	1981	24253	<hkxhk>		9	64.074	0.083	RACA4	AGAGAAGTTGATTCATGGCTTCATCTCCCGCGGGCTTCATTTCTGTTGTGG	47	G	C	kk	--	kk	hh	hk	kk	kk	hk	kk	hh	kk	kk	kk	hh	hh	kk	kk	hk	hh	hh	hk	hk	hk	hk	hk	hh	hk	hk	hk	kk	hh	hk	kk	hk	hh	kk	hh
67	1982	24254	<hkxhk>		9	64.082	0.008	RACA4	TTAAAATCAGTGCCATACTGAACTGGCAGCTCATGTAAGGACTGAAGAAAA	9	G	A	hh	hh	hh	kk	hk	hh	hh	hk	hh	kk	hh	hh	hh	kk	kk	hh	hh	hk	kk	kk	hk	hk	hk	hk	hk	kk	hk	hk	hk	hh	kk	hk	hh	hk	kk	hh	kk
68	1984	24274	<hkxhk>		9	64.111	0.029	RACA4	ACACTTCATTCGCTGTCCCTACACTCTTTCTTTACACTCTTCAGTCACTAG	7	A	C	--	kk	kk	hh	hk	kk	kk	hk	kk	hh	kk	kk	kk	--	hh	kk	kk	hk	hh	hh	hk	hk	hk	hk	hk	hh	hk	hk	hk	kk	hh	hk	kk	hk	hh	kk	hh
69	1987	24338	<hkxhk>		9	64.114	0.003	RACA4	GGAACCGGAGGAGAAAGGGGGAGTTTTTCTGTGTTCTGCAGTAGAAATGAT	26	T	G	hh	hh	hh	kk	hk	hh	hh	hk	hh	kk	hh	hh	hh	kk	kk	hh	hh	hk	kk	kk	hk	hk	hk	hk	hk	kk	hk	hk	hk	hh	kk	hk	--	hk	--	hh	kk
70	1996	24468	<nnxnp>		9	64.117	0.003	RACA4	TACAATCTCTTTTTTCTCCACTCTCTTTCTGCTCTCCTACAGTGACGTCTG	10	C	T	np	np	np	nn	np	np	np	nn	np	nn	np	np	np	nn	nn	np	np	nn	nn	nn	np	np	nn	nn	nn	nn	np	nn	np	np	nn	np	np	nn	nn	np	nn
71	1980	24251	<hkxhk>		9	64.169	0.052	RACA4	AAAATTAGACAAATGGTTTCCTCAAACTTGTCAAAAACAATGTGTGTTAAA	43	G	A	kk	kk	kk	hh	hk	kk	kk	hk	kk	hh	kk	kk	kk	hh	hh	kk	kk	hk	hh	hh	hk	hk	hk	hk	hk	--	hk	hk	--	kk	hh	hk	--	hk	hh	kk	hh
72	1985	24280	<hkxhk>		9	64.174	0.005	RACA4	GACCTCTGACCTCATTCTGTCAAGAGGGTTCACTTATTTCCATCAATGAAA	13	A	G	hh	hh	hh	kk	hk	hh	hh	hk	hh	--	hh	hh	hh	kk	kk	hh	hh	hk	kk	kk	hk	hk	hk	hk	hk	kk	hk	hk	hk	hh	kk	hk	hh	hk	kk	hh	kk
73	1983	24265	<hkxhk>		9	64.812	0.638	RACA4	GTAAAGGTCTAATACAGTGTGAACTGACACACATGAACAGGTTTTTTAGGG	26	A	G	hh	hh	--	kk	hk	hh	hh	hk	hh	hk	hh	hh	hh	kk	kk	hh	hh	hk	kk	kk	hk	hk	hk	hk	hk	kk	hk	hk	--	hh	kk	hk	--	hk	kk	hh	kk
74	1975	24168	<nnxnp>	1975	9	65.099	0.287	RACA4	ATGTTCCATGTCCCAAATGTGATCGTTTCTGAAAGGAATACTTTGGATGCT	12	T	C	np	np	np	nn	np	np	np	nn	np	nn	np	np	np	nn	nn	np	np	nn	nn	nn	np	np	nn	nn	nn	nn	np	nn	np	np	nn	np	np	nn	nn	np	nn
75	1979	24198	<nnxnp>	1975	9	65.099	0	RACA4	TCAACGTCACAAATCGTGGTCAGCGATTTCTCTCTGAGCTTTTGACTCTAT	29	T	C	np	np	np	nn	np	np	np	nn	np	nn	np	np	np	nn	nn	np	np	nn	nn	nn	np	np	nn	nn	nn	nn	np	nn	np	np	nn	np	np	nn	nn	np	nn
76	1978	24188	<nnxnp>		9	65.115	0.016	RACA4	GACATCTGAAGGGTGAATTGATCAAAACCCAATCCATAAAGAGCTGGGAGC	34	T	C	np	np	np	nn	np	np	np	nn	np	--	np	np	np	nn	nn	np	np	nn	nn	nn	np	np	nn	nn	nn	nn	np	nn	--	np	nn	np	np	nn	nn	np	nn
77	2015	24695	<nnxnp>		9	70.601	5.486	RACA4	TCAGCTTCTCAGAGAGGAAACAGCTGTATCTTAAGACTTTAATGTTCAATA	31	G	T	np	np	np	nn	np	np	np	nn	np	nn	np	np	np	nn	nn	np	np	--	nn	--	np	np	nn	nn	nn	nn	np	nn	np	np	nn	np	np	nn	nn	np	nn
78	5362	68600	<nnxnp>		9	70.631	0.03	sc00292	TTACATCAATAACCAGTAGTTATAAACAAAGCTCTACTGAAATGTTCTTCC	22	A	T	np	np	np	nn	np	np	np	nn	np	nn	np	np	np	nn	nn	np	np	nn	nn	--	np	np	nn	nn	nn	nn	np	nn	np	np	nn	np	np	nn	nn	np	nn
79	2019	24751	<nnxnp>		9	72.197	1.566	RACA4	TCAGCACTGAGGACATCCAGCTGTGTGCTAACCGTAGGCAACATGTGAGAG	5	A	G	np	np	np	nn	np	np	np	nn	np	nn	np	np	np	nn	nn	np	np	nn	nn	nn	np	np	nn	--	nn	nn	np	nn	--	np	nn	np	np	nn	nn	np	nn
1	2570	31361	<lmxll>		10	0		RACA1	GAATCCCGCCCGTCAGGTAATTATATAGATAATTTTATATTGTTGTTATTA	6	C	T	ll	lm	ll	lm	lm	ll	ll	ll	lm	ll	ll	lm	lm	lm	lm	lm	lm	ll	ll	ll	ll	lm	ll	lm	--	lm	ll	lm	ll	ll	ll	ll	--	lm	lm	lm	lm
2	2549	31119	<hkxhk>		10	2.864	2.864	RACA1	NAATTCTGGGTTATAAAATGCCAATCTAATTCTGACATCTTTCGTCAGCAG	12	A	C	hh	hh	kk	hk	hh	hk	kk	kk	hk	hk	kk	hh	hh	hh	hh	hk	hh	hk	hk	kk	hk	hh	hk	hh	kk	hk	kk	hh	kk	hk	kk	hk	hh	hk	hk	hk	--
3	2569	31322	<lmxll>		10	3.395	0.531	RACA1	GCTTTATAAAAGCTGCTTAAACCCCAGATGACCAGTCAACTCTTCGCTTGA	21	C	A	ll	lm	--	lm	lm	ll	ll	ll	lm	ll	ll	lm	lm	lm	lm	lm	lm	ll	ll	ll	ll	lm	ll	lm	ll	lm	ll	lm	--	lm	ll	ll	lm	lm	lm	lm	lm
4	2565	31271	<lmxll>		10	4.473	1.078	RACA1	ACAAATACAAGAAAAAAACAAGTTAATCTGCACTTAGAATCTAACCAGAAG	11	A	C	ll	lm	ll	lm	lm	ll	ll	ll	lm	ll	ll	lm	lm	lm	lm	lm	lm	ll	ll	ll	ll	lm	ll	lm	ll	lm	ll	lm	ll	lm	ll	ll	lm	lm	lm	lm	lm
5	2564	31269	<lmxll>		10	5.325	0.852	RACA1	GGAATTTGGCAGCTGTGACAAGGAGAATTAAGATACAATTAAAAGCCAAAT	15	T	C	ll	lm	--	lm	lm	ll	ll	ll	lm	--	ll	lm	lm	lm	lm	lm	lm	ll	ll	ll	ll	lm	ll	lm	ll	lm	ll	lm	ll	lm	ll	ll	lm	lm	lm	lm	lm
6	2566	31289	<lmxll>		10	5.903	0.578	RACA1	CACCATGTTTGTATCTGGGAAGTTTGGTGATATGAGAGTCTGTTGTGGTGC	17	G	T	ll	lm	--	lm	lm	ll	ll	ll	lm	ll	ll	lm	lm	lm	lm	lm	lm	ll	ll	ll	ll	--	ll	lm	ll	lm	ll	lm	ll	lm	ll	ll	lm	lm	lm	lm	lm
7	2548	31093	<efxeg>		10	6.061	0.158	RACA1	CAGCGTGTAATACAAGGGCTTGCAGGAAAAAAAATGATTAAAAATGCAAAN	33	A	T	ef	eg	--	eg	ee	ef	fg	fg	eg	ef	fg	ee	ee	ee	ee	eg	ee	ef	ef	fg	ef	ee	ef	ee	fg	eg	fg	ee	--	eg	fg	ef	ee	eg	eg	eg	eg
8	2561	31246	<lmxll>		10	7.154	1.093	RACA1	GCAAAGAAAGGTTCAGTAATTTTGATGTTTCTTCACAATTACACTATTTTA	13	C	G	ll	lm	ll	lm	lm	ll	ll	ll	lm	ll	ll	lm	lm	lm	lm	lm	lm	ll	ll	ll	ll	lm	ll	lm	ll	lm	ll	lm	ll	lm	ll	ll	lm	lm	lm	lm	lm
9	2545	31063	<nnxnp>		10	7.839	0.685	RACA1	TGAAAGTCATCCGCAAAAACATCGTCAAGAAGTGCCTGGAGTTGTTCGCAG	41	T	C	nn	np	np	np	nn	nn	np	np	np	nn	np	nn	nn	nn	nn	np	nn	nn	nn	np	nn	nn	nn	nn	np	np	np	nn	np	np	np	nn	nn	np	np	np	np
10	2562	31255	<lmxll>		10	7.841	0.002	RACA1	ATATTTTGGAAAAGGCGCTAATCAAACTAAGAAGTAGCGGAAATTCTCCAA	3	T	A	ll	lm	--	lm	lm	ll	ll	ll	lm	ll	ll	lm	lm	lm	lm	lm	lm	ll	ll	ll	ll	lm	ll	lm	ll	lm	ll	lm	ll	lm	ll	ll	lm	lm	lm	lm	lm
11	2544	31039	<lmxll>		10	8.903	1.062	RACA1	CCACAACACATAAATATTCCACAAACAAGTGATTTGTCGTCTTTGCAGCCT	15	A	G	lm	ll	lm	ll	ll	lm	lm	lm	ll	lm	lm	ll	ll	ll	ll	ll	ll	lm	lm	lm	lm	ll	lm	ll	lm	ll	lm	ll	lm	ll	lm	lm	ll	ll	ll	ll	ll
12	3801	46422	<lmxll>		10	9.865	0.962	RACA19	CACTTCGGATGAAGCAAATATCCACTGTATCCCATCTAAAAACCCAACACA	29	T	A	ll	lm	ll	lm	lm	ll	ll	ll	lm	ll	ll	lm	lm	lm	lm	lm	lm	ll	ll	ll	ll	lm	ll	lm	ll	lm	ll	lm	ll	lm	ll	ll	lm	lm	lm	lm	lm
13	2550	31130	<hkxhk>		10	11.008	1.143	RACA1	GGAAGTTTTTAAATATTAAAAATAAAAACATTACCACAATTACAGCAAGGA	6	T	C	hk	hh	--	hk	hh	kk	kk	kk	hk	hk	kk	hh	hh	hh	hh	hk	hh	hk	hk	kk	hk	hk	hk	hh	kk	hk	kk	hh	kk	hk	kk	hk	hh	hk	hk	hk	hk
14	2556	31182	<lmxll>		10	11.382	0.374	RACA1	GACATGAAAAAGGACAAAAAAGAAAAAAAGTGACCTGTCAGCTAACAGGCC	5	G	A	ll	lm	ll	lm	lm	ll	ll	ll	lm	ll	ll	lm	lm	lm	lm	lm	lm	ll	ll	ll	ll	lm	ll	lm	ll	lm	ll	lm	ll	lm	ll	ll	lm	lm	lm	lm	lm
15	2554	31173	<lmxll>		10	11.448	0.066	RACA1	TGGTGAGAAGAAAAATCCAACATTTTGATGGAAAAATAAAAAAGCACAAAT	14	A	C	ll	lm	ll	lm	lm	ll	ll	ll	lm	ll	ll	lm	lm	lm	lm	lm	lm	ll	ll	ll	ll	lm	ll	lm	ll	lm	ll	lm	ll	lm	ll	ll	lm	lm	lm	lm	lm
16	2555	31179	<lmxll>		10	11.685	0.237	RACA1	GCAAGGAGGAATGGACCAAAATGCCGGTTTGTGAAAACTTTGTAAAGACTT	25	G	A	ll	lm	ll	lm	lm	ll	ll	ll	lm	ll	ll	lm	lm	lm	lm	lm	lm	ll	ll	ll	ll	lm	ll	lm	ll	lm	ll	lm	ll	lm	ll	ll	lm	lm	lm	lm	lm
17	2543	31037	<efxeg>		10	11.73	0.045	RACA1	TTTTAATGTTAAGGCAGCAGCGAAGCCGTACCGTTCTGAGGGTTAGAGATG	16	G	A	ef	eg	fg	eg	ee	ef	fg	--	eg	ef	--	ee	ee	ee	ee	eg	ee	ef	ef	fg	ef	ee	ef	ee	fg	eg	fg	ee	fg	eg	fg	ef	ee	eg	eg	eg	eg
18	2557	31185	<lmxll>	2557	10	12.415	0.685	RACA1	TAGAATATTACAGCATCATCAGCGAAAAAAATGAACATAATAAAAGCCAAG	35	C	G	ll	lm	ll	lm	lm	ll	ll	ll	lm	ll	ll	lm	lm	lm	lm	lm	lm	ll	ll	ll	ll	lm	ll	lm	ll	lm	ll	lm	ll	lm	ll	ll	lm	lm	lm	lm	lm
19	2558	31186	<lmxll>	2557	10	12.415	0	RACA1	AGTAAATGCAGTGTCTAAATCTGACAACTGTCAACATGTTTTACTTTCACA	14	C	T	ll	lm	ll	lm	lm	ll	ll	ll	lm	ll	ll	lm	lm	lm	lm	lm	lm	ll	ll	ll	ll	lm	ll	lm	ll	lm	ll	lm	ll	lm	ll	ll	lm	lm	lm	lm	lm
20	2552	31136	<hkxhk>		10	12.514	0.099	RACA1	AACAATTTAATCCTGGAACAAGTCTGGTTTTCCCTTTTTTTTCATGTTGTT	31	C	T	hk	hh	kk	hk	hh	kk	kk	kk	hk	hk	kk	hh	hh	hh	hh	hk	hh	hk	hk	kk	hk	hk	hk	hh	kk	hk	kk	hh	--	hk	kk	hk	hh	hk	hk	hk	hk
21	2551	31131	<hkxhk>		10	12.739	0.225	RACA1	GCCACTGGCACACGCTCACCGACACATAGGACGAGCTGCACTTTCAGAAGA	31	C	G	hk	kk	hh	hk	kk	hh	hh	hh	hk	hk	hh	kk	kk	kk	kk	hk	kk	hk	hk	hh	hk	hk	hk	kk	hh	hk	hh	kk	hh	hk	hh	hk	kk	hk	hk	hk	hk
22	2574	31385	<lmxll>		10	13.79	1.051	RACA1	GACAGCGACGGTCCGGGAGGACAGCGCTGCATCTGGTTGTACTTAAGTCCT	10	G	A	--	lm	ll	lm	lm	ll	ll	ll	lm	--	ll	lm	lm	lm	lm	lm	lm	ll	ll	ll	ll	lm	ll	lm	ll	lm	ll	lm	ll	ll	ll	ll	lm	lm	lm	lm	lm
23	2559	31193	<lmxll>		10	15.769	1.979	RACA1	CTCTTTTTAACAAAACTCCTGGAAACATCAAGTCTGAACTGGCTGCTTCTC	20	G	A	lm	ll	lm	ll	ll	lm	lm	lm	ll	lm	lm	ll	ll	ll	ll	ll	ll	lm	lm	lm	lm	ll	lm	ll	lm	ll	lm	ll	lm	ll	lm	lm	ll	ll	ll	ll	ll
24	2546	31083	<lmxll>		10	16.907	1.138	RACA1	GGGATGTTTCTCATGCTAAAAATTATCTTCAGGTGGTTCTTAAAGGGACAT	23	T	G	lm	ll	--	ll	ll	lm	lm	lm	ll	lm	lm	ll	ll	ll	ll	ll	ll	lm	lm	lm	lm	ll	lm	ll	lm	ll	lm	ll	--	ll	lm	lm	ll	ll	ll	ll	ll
25	2538	30957	<nnxnp>		10	19.848	2.941	RACA1	TTCGGCTGCAGCTCACTGGCTTTTGTTTTTTAAAAAAGATCCCTTTGGAAT	30	T	C	np	nn	--	nn	np	np	np	nn	nn	np	nn	nn	np	np	np	nn	np	nn	np	nn	np	np	nn	np	nn	nn	nn	np	--	np	nn	np	np	nn	nn	nn	nn
26	2533	30914	<efxeg>		10	27.753	7.905	RACA1	TCAAATGTTTCCTCTACATTTCTTTGTATTTTTTTCCTTTTAAAATGTGAA	11	C	T	fg	ee	ef	ee	eg	fg	fg	ef	ef	fg	ef	ee	eg	fg	eg	ee	eg	ef	fg	ef	fg	eg	ef	eg	ef	ee	ef	fg	--	eg	ef	fg	eg	ee	ef	ee	ee
27	2531	30887	<lmxll>		10	27.828	0.075	RACA1	TAATGATCAGGATTGGGTAAACCAATCTGAACTGGAGTGTATTTCCACTTC	29	A	C	lm	ll	lm	ll	ll	lm	lm	lm	lm	lm	lm	ll	ll	lm	ll	ll	ll	lm	lm	lm	lm	ll	lm	ll	lm	ll	lm	lm	lm	ll	lm	lm	ll	ll	lm	ll	ll
28	2532	30911	<hkxhk>		10	29.386	1.558	RACA1	AGACAGTCGCTGGATGAAGAGACCTAATAAGAAGCATTGTTTGCTGGGGAG	4	A	G	hh	kk	hk	kk	hk	hh	hh	hk	hk	hh	hk	kk	hk	hh	hk	kk	hk	hk	hh	hk	hh	hk	hk	hk	hk	kk	hk	hh	--	--	--	hh	hk	kk	hk	kk	kk
29	2524	30767	<nnxnp>		10	30.102	0.716	RACA1	GTGTTATTCCAATTATCTTAGATGTCCAACTCCTTTCTCCCCTCAAGCTAA	38	C	T	nn	np	nn	np	nn	nn	nn	np	np	np	np	np	nn	nn	nn	np	nn	np	np	np	nn	nn	np	nn	np	np	np	nn	np	nn	nn	nn	nn	np	np	nn	np
30	2527	30787	<nnxnp>		10	32.803	2.701	RACA1	NAATTCTTAGCGAAAAACCACTAGATTTGGGGATATGGACCACAATGCATT	13	A	G	np	nn	np	nn	np	np	np	nn	nn	np	nn	nn	np	np	np	nn	np	nn	nn	nn	np	np	nn	np	nn	nn	nn	np	nn	np	np	np	np	nn	nn	np	nn
31	2490	30346	<nnxnp>		10	41.286	8.483	RACA1	TTCTTTAAGATACTGGAAGCCCAAAAATAAATGGTTGGTGTTCTGCTTTTT	12	A	C	np	nn	np	nn	np	np	np	np	nn	nn	nn	nn	np	np	np	nn	np	nn	nn	nn	np	np	nn	np	nn	nn	nn	np	nn	np	np	np	np	np	nn	np	nn
32	2493	30384	<nnxnp>		10	41.793	0.507	RACA1	TTTCCCCCTTTGTTCTTCAAATCCATCTCAACAAAAACAGAGGCAAAAGAA	11	T	G	np	nn	--	nn	np	np	np	np	nn	nn	nn	nn	np	np	np	nn	np	nn	nn	nn	np	np	nn	np	nn	nn	nn	np	nn	np	np	np	np	np	nn	np	nn
33	2508	30588	<efxeg>		10	42.037	0.244	RACA1	CTGGATGATATTAAGTTAATAGGACACCAGGGAAGATTGTAACATTGGTGT	17	A	C	eg	ef	fg	ef	eg	eg	fg	fg	ee	ee	ee	ef	eg	eg	fg	ef	eg	ee	ee	ee	eg	fg	ee	eg	ee	ee	ee	eg	ee	fg	eg	eg	fg	fg	ee	fg	ef
34	2507	30579	<nnxnp>		10	42.203	0.166	RACA1	TCTCCTTAAGACATAATAATAATTGCTATTATAAATGTTTTGTTGTCCTTA	25	C	T	np	--	np	nn	np	np	np	np	nn	--	nn	nn	np	np	np	nn	np	nn	nn	nn	np	np	nn	np	nn	nn	nn	np	nn	np	np	np	np	np	nn	np	nn
35	2497	30428	<hkxhk>		10	42.395	0.192	RACA1	GACAATTTTCCAGAGAGGAAAGACACAGAAATCACAGTGTTAGCTGCACGT	9	C	T	kk	--	hk	hh	kk	kk	hk	hk	hk	hk	hk	hh	kk	kk	hk	hh	kk	hk	hk	hk	kk	hk	hk	kk	hk	hk	hk	kk	--	hk	kk	kk	hk	hk	hk	hk	hh
36	2506	30578	<efxeg>		10	42.833	0.438	RACA1	TAAAAGTTTTTGAAAAGGTGCTTGATTTTGAAGAAAGACATTCAACCCAGT	38	C	T	eg	ef	fg	ef	eg	eg	fg	fg	ee	ee	ee	ef	eg	--	fg	ef	--	ee	ee	ee	eg	fg	ee	eg	ee	ee	ee	eg	ef	fg	eg	eg	fg	fg	--	fg	ef
37	2505	30569	<hkxhk>		10	42.899	0.066	RACA1	GCAGGTCAAACGGAGCAGATAACTTGAATGAACGCACACAAAGTGAAATGT	44	G	C	hk	hk	kk	hk	hk	hk	kk	kk	hh	hh	hh	hk	hk	hk	kk	hk	hk	hh	hh	hh	hk	kk	hh	hk	hh	hh	hh	hk	hk	kk	hk	hk	kk	--	hh	kk	hk
38	2519	30681	<lmxll>		10	43.054	0.155	RACA1	AACTTTCAATATCTCCTGCAGCCTAATCTACAGCACTGTGACAGTCTCCCG	13	T	G	ll	lm	--	lm	ll	ll	lm	lm	--	ll	ll	lm	ll	ll	lm	lm	ll	ll	ll	ll	ll	lm	ll	--	ll	ll	ll	ll	--	lm	ll	ll	lm	lm	ll	lm	lm
39	2504	30567	<lmxll>		10	43.597	0.543	RACA1	CACAGGTTGGATCATTAATACGGTTACTCACCAACCAGCCTGCTGGTGGTC	6	T	C	ll	lm	--	lm	ll	ll	lm	lm	ll	ll	ll	lm	ll	ll	lm	lm	ll	ll	ll	ll	ll	lm	ll	ll	ll	ll	ll	ll	lm	lm	ll	ll	lm	lm	ll	lm	lm
40	2513	30619	<lmxll>		10	43.62	0.023	RACA1	TTGACTCCGCCCCCCCATGCCGCTTTTTTTTTGTTCCACATGATTTTGTCT	8	G	C	ll	lm	lm	lm	ll	ll	lm	lm	ll	ll	ll	lm	ll	ll	lm	lm	ll	ll	ll	ll	ll	lm	ll	ll	ll	ll	ll	ll	lm	lm	ll	ll	lm	lm	ll	lm	lm
41	2518	30671	<lmxll>		10	43.732	0.112	RACA1	GATGTAACTAATGTGTTTCTTTAAAGTGCTCCTTTAATTTTTGTGAGCATA	6	A	T	ll	lm	lm	lm	ll	ll	lm	lm	ll	ll	ll	lm	ll	ll	lm	lm	ll	ll	ll	ll	ll	lm	ll	ll	ll	ll	ll	ll	lm	lm	ll	ll	lm	lm	ll	lm	lm
42	2501	30531	<hkxhk>		10	43.795	0.063	RACA1	ACCTCTGAAGGACCCTCTTTGAGAAGCTCAGAGTCTAAGCCGTGTGGAACA	15	T	G	hk	hk	--	hk	hk	hk	hh	hh	kk	kk	kk	hk	hk	hk	hh	hk	hk	kk	kk	kk	hk	hh	kk	hk	kk	kk	kk	hk	--	hk	hk	hk	hh	hh	kk	--	hk
43	2502	30536	<lmxll>		10	43.983	0.188	RACA1	CAGTTTTCTTACAGTAAACAAAAATAAGATGCAATTCTTTTTCTCTACGAC	10	A	G	--	lm	--	lm	ll	ll	lm	lm	ll	ll	ll	lm	ll	ll	lm	lm	ll	ll	ll	ll	ll	lm	ll	ll	ll	ll	ll	ll	lm	--	ll	ll	lm	lm	ll	lm	lm
44	2495	30396	<hkxhk>		10	44.183	0.2	RACA1	CCGTTTTGATGCATCTGGAGCAAGATGTCGCAGCCTCCCACAAACTCCCCT	41	A	G	hk	hk	kk	hk	hk	hk	kk	kk	hh	hh	hh	hk	hk	hk	kk	hk	hk	hh	hh	hh	hk	kk	hh	hk	hh	hh	hh	hk	--	kk	hk	hk	kk	kk	hh	kk	hk
45	2512	30615	<hkxhk>		10	44.927	0.744	RACA1	GAATTCTCTTTAAAGGACAAGAGGAAGCACAGAAAGGCTTTAAAAAACCCA	33	A	G	hh	hk	kk	hk	hk	hk	kk	kk	hh	hh	hh	hk	hk	hk	kk	hk	hk	hh	hh	hh	hk	kk	hh	hk	hh	hh	hh	hk	hk	kk	hk	hk	kk	kk	hh	kk	hk
46	2498	30453	<lmxll>		10	46.324	1.397	RACA1	NAATTCCTACCGCTCTGCAGAAACTACTTCCTTGAAAGAAACTGTTTTTTT	10	C	T	lm	ll	--	ll	lm	lm	ll	ll	lm	lm	lm	ll	lm	lm	ll	--	lm	lm	lm	lm	lm	ll	lm	lm	lm	--	lm	lm	ll	ll	lm	lm	ll	ll	lm	ll	ll
47	2500	30507	<hkxhk>		10	47.486	1.162	RACA1	GTCGTGCAACACCTCTACATATCAGAGGAACTAGTGACTTTGTGTTTTTCC	20	A	G	hk	hk	hh	hk	hk	hk	hh	hh	kk	kk	kk	hk	hk	hk	hh	hk	hk	kk	kk	kk	hk	hh	kk	hk	kk	kk	kk	hk	hk	hh	hk	hk	hh	hh	kk	hh	hk
48	2520	30718	<hkxhk>		10	47.708	0.222	RACA1	CCTACTGCAAACTAAATCTGGACTATTAAAGACCCCACTGACCTCCGTCTT	46	G	T	kk	hh	hk	hh	kk	kk	hk	hk	hk	hk	hk	hh	kk	kk	hk	hh	kk	hk	hk	hk	kk	hk	hk	kk	hk	hk	hk	kk	hh	hk	kk	kk	hk	hk	hk	hk	hh
49	2475	30244	<nnxnp>		10	48.567	0.859	RACA1	TTTAAAAAAATAAGATACCGCTAGATTGGGTTGATTTTTCTTTTAAAGCGG	16	A	G	np	nn	np	nn	np	np	np	np	nn	nn	nn	np	np	nn	np	nn	np	nn	nn	nn	np	np	nn	np	nn	nn	nn	np	nn	np	np	np	np	np	nn	np	nn
50	2494	30388	<lmxll>		10	49.407	0.84	RACA1	AAGGTGAATAAAGATTACAGGTAAGAGGAATCAAGATACAATATAGAATAC	44	A	G	lm	ll	ll	ll	lm	lm	ll	ll	lm	lm	lm	ll	lm	lm	ll	ll	lm	lm	lm	lm	lm	ll	lm	lm	lm	lm	lm	lm	ll	ll	lm	lm	ll	ll	lm	ll	ll
51	2571	31380	<nnxnp>		10	57.075	7.668	RACA1	GTTTGTGTGGGTTTTATCACCAAATCTATGAGCCCAAAATCTGTGATAAAA	5	G	T	np	np	--	--	np	np	np	np	nn	nn	np	np	np	nn	nn	nn	np	nn	nn	nn	np	np	nn	np	nn	np	nn	np	--	nn	np	np	nn	np	nn	--	np
52	2649	32282	<nnxnp>		10	58.282	1.207	RACA1	TTAAAATTGCAGGATATTTTACTGAAAATGTATTGTCTATATATATATTAA	6	A	T	nn	np	nn	nn	nn	nn	nn	nn	np	np	nn	nn	nn	np	np	np	nn	np	np	np	nn	nn	np	nn	np	np	np	nn	np	nn	nn	nn	nn	nn	np	nn	nn
53	2634	32095	<lmxll>		10	59.589	1.307	RACA1	GAACTTCTGCACCCATCATCGTCCCTGTGTGAACGGCGCCACCTGCATGAA	18	T	C	ll	lm	--	lm	ll	ll	lm	lm	ll	ll	ll	lm	ll	ll	ll	lm	ll	ll	ll	ll	ll	ll	ll	ll	ll	ll	ll	ll	lm	lm	ll	ll	lm	lm	ll	ll	ll
54	2645	32236	<lmxll>		10	59.601	0.012	RACA1	AATTAGAATGAAATGAAACCAAGAAAAATGATTCTCCTTTTTTCTATTTTA	24	A	G	ll	lm	lm	lm	ll	ll	lm	lm	ll	ll	ll	lm	ll	ll	ll	lm	ll	ll	ll	ll	ll	ll	ll	ll	ll	ll	ll	--	lm	lm	ll	ll	lm	lm	ll	ll	ll
55	2662	32421	<nnxnp>		10	59.602	0.001	RACA1	TTTTGACTTGAGCAAACTCTTAATGGAAACTCCTATCAAAATGGGTGGAAT	45	T	G	np	nn	np	np	np	np	np	np	nn	nn	np	np	np	nn	nn	nn	np	nn	nn	nn	np	np	nn	np	nn	nn	nn	np	--	--	np	np	np	np	nn	np	np
56	2599	31728	<lmxll>		10	59.622	0.02	RACA1	CCAAAACATATAGACCCAAGATACTCGCTCAACATCATCCATGACGGGACA	26	G	A	ll	lm	lm	lm	ll	ll	lm	lm	ll	ll	ll	lm	ll	ll	ll	lm	ll	ll	ll	ll	ll	ll	ll	ll	ll	ll	ll	ll	lm	lm	ll	ll	lm	lm	ll	ll	ll
57	2619	31992	<lmxll>		10	60.927	1.305	RACA1	TAATGTCCATGAAGACTTTCTCTCTGCGGGTTCACTGAGTGGTCTACAACC	6	C	T	ll	lm	lm	lm	ll	ll	lm	lm	ll	ll	ll	lm	ll	ll	ll	lm	ll	ll	ll	ll	ll	ll	ll	ll	ll	ll	ll	ll	lm	lm	ll	ll	lm	lm	ll	ll	ll
58	2674	32550	<efxeg>		10	60.944	0.017	RACA1	AGGGTCGTTTTGGCCCTCTCGGATTGCCATCCCTCTTCACTCTCCTGACTC	6	T	G	ee	ef	--	fg	eg	eg	fg	--	ee	ee	eg	fg	eg	ee	ee	ef	eg	ee	--	ee	eg	eg	ee	eg	ee	eg	ee	eg	--	fg	eg	eg	ef	fg	ee	eg	eg
59	2611	31878	<hkxhk>		10	62.246	1.302	RACA1	GCAGCACAGATGCTGAGCGTCTGCATTCCAACCACAACAGCACTTCCATTT	27	C	G	hk	hk	kk	kk	hk	hk	kk	kk	hh	hh	hk	kk	hk	hh	hh	hk	hk	hh	hh	hh	hk	hk	hh	hk	hh	hk	hh	hk	hk	kk	hk	hk	hk	kk	hh	hk	hk
60	2646	32242	<efxeg>		10	62.32	0.074	RACA1	ACGTCTCTTCCCCGTCATAGAAAGCTAGCGTTAGCATTAGCATAAATTAAA	7	T	A	eg	--	--	--	eg	eg	fg	fg	ee	ee	eg	fg	eg	ee	ee	ef	eg	ee	ee	ee	eg	eg	ee	eg	ee	eg	ee	eg	ef	--	eg	eg	ef	fg	ee	eg	eg
61	2639	32144	<nnxnp>		10	62.639	0.319	RACA1	GAGGAAACGTCTGTAAAATCCTCCCGAAAGAGGAGATCCTCTGCGCCTCCT	24	T	C	np	nn	--	np	np	np	np	np	nn	nn	np	np	np	nn	nn	nn	np	nn	nn	nn	np	np	nn	np	nn	np	nn	np	--	np	np	np	nn	np	nn	np	np
62	2496	30398	<lmxll>		10	62.642	0.003	RACA1	TGATGCGGGTTGGTTCAGTTGAAAGGTGCTTCGCAGAAACAACCTTTTCTC	47	T	A	ll	lm	lm	lm	ll	ll	lm	lm	ll	ll	ll	lm	ll	ll	ll	lm	ll	ll	ll	ll	ll	ll	ll	ll	ll	ll	ll	ll	lm	lm	ll	ll	lm	lm	ll	ll	ll
63	5479	70792	<nnxnp>		10	62.672	0.03	sc00733	GATCCCATCAATCCTCCCTGTAATTATTTCCAGGATTAGATTAATAAATTC	29	C	T	np	nn	--	np	np	np	np	np	nn	nn	np	np	np	nn	nn	nn	np	nn	nn	nn	np	np	--	np	nn	--	nn	np	--	np	np	np	nn	np	nn	np	np
64	2626	32075	<hkxhk>		10	62.68	0.008	RACA1	GGTGAAAACAAACACAGTGATGTGCTGCTGGTGTCTTTGTAGAGCTCTCCA	27	C	A	hk	hk	--	hh	hk	hk	hh	hh	kk	kk	hk	hh	hk	kk	kk	hk	hk	kk	kk	kk	hk	hk	kk	hk	kk	hk	kk	hk	hk	hh	hk	hk	hk	hh	kk	hk	hk
65	2610	31875	<lmxll>		10	62.839	0.159	RACA1	TCATCAGCAGATGATCAGACGTAGGTCAGGATCTTCCTCCTCTGAAGCTCT	20	G	C	ll	lm	lm	lm	ll	ll	lm	lm	ll	ll	ll	lm	ll	ll	ll	lm	ll	ll	ll	ll	ll	ll	--	ll	ll	ll	ll	ll	lm	--	ll	ll	lm	lm	ll	ll	ll
66	2647	32261	<lmxll>		10	62.858	0.019	RACA1	ATTTGTCTGCAAGTTGATCCATCTGAATTGTAGTAGAGAAGAAATATTATT	16	A	G	ll	lm	lm	lm	ll	ll	lm	lm	ll	ll	ll	lm	ll	ll	ll	lm	ll	ll	ll	ll	ll	ll	ll	ll	ll	ll	ll	ll	lm	lm	ll	ll	lm	lm	ll	ll	ll
67	2641	32175	<hkxhk>		10	62.928	0.07	RACA1	GTAAACGCTATGAGGACATGGGTCGGAAATGAAGCAAGAAAATAGATGTTT	47	G	T	hk	hk	hh	hh	hk	hk	hh	hh	kk	kk	hk	hh	hk	kk	kk	hk	hk	kk	kk	kk	hk	hk	kk	hk	kk	kk	kk	hk	hk	hh	hk	hk	hk	hh	kk	hk	hk
68	2638	32139	<lmxll>		10	63.365	0.437	RACA1	TTTTCAAACATCTTTTACAACTCTTTTAAAGATTGCAGATTTTTATTGCTT	4	C	T	ll	lm	lm	lm	ll	ll	lm	lm	ll	ll	ll	lm	ll	ll	ll	lm	ll	ll	ll	ll	ll	ll	ll	ll	ll	ll	ll	ll	lm	lm	ll	ll	lm	lm	ll	ll	ll
69	2643	32218	<hkxhk>		10	63.49	0.125	RACA1	GATAAAGCAAAGGACAAATCTGAAAGGATTTATCCGAATGACCACCTGACC	34	C	T	hk	hk	hh	--	hk	hk	hh	hh	kk	kk	hk	hh	hk	kk	kk	hk	hk	--	kk	--	hk	hk	kk	hk	kk	hk	kk	hk	hk	hh	hk	hk	hk	hh	kk	hk	hk
70	2637	32128	<efxeg>		10	63.848	0.358	RACA1	ATGAATGTGGTAACATTAGTCTATACCCTGAAAAAGGTATTCTGACTCGTC	5	T	C	eg	ef	fg	fg	eg	eg	fg	fg	ee	ee	eg	fg	eg	ee	ee	ef	eg	ee	ee	ee	eg	eg	ee	eg	ee	eg	ee	eg	ef	fg	eg	eg	ef	fg	ee	eg	eg
71	2644	32222	<lmxll>		10	63.856	0.008	RACA1	GGTTTCCCTTTTAACTCATATTCGCAATACAGCCGGTTGACCCGGTCATAG	23	G	A	ll	lm	lm	lm	ll	ll	lm	lm	ll	ll	ll	lm	ll	ll	ll	lm	ll	ll	ll	ll	ll	ll	ll	ll	ll	ll	ll	ll	lm	lm	ll	ll	lm	lm	ll	ll	ll
72	2614	31920	<lmxll>		10	63.996	0.14	RACA1	TTATTAGTCTACCAGCAGACCTCACTAGTCCAATTTCATTTCACTTAATAA	46	A	C	ll	lm	lm	lm	ll	ll	lm	lm	ll	ll	ll	lm	ll	ll	ll	lm	ll	ll	ll	ll	ll	ll	ll	ll	ll	ll	ll	ll	lm	lm	ll	ll	lm	lm	ll	ll	ll
73	4982	62168	<lmxll>		10	64.213	0.217	RACA33	TGAAAAGGGGAAATAAAAAAGGAGAAAAATAAATGGCAAAAACTATAGGAT	23	G	C	ll	lm	lm	lm	ll	ll	lm	lm	ll	ll	ll	lm	ll	ll	ll	lm	ll	ll	ll	--	ll	ll	ll	ll	ll	ll	ll	ll	lm	lm	ll	ll	lm	lm	ll	ll	ll
74	2640	32173	<efxeg>		10	64.683	0.47	RACA1	TTAGGCACATTTTTAGTTCAGCTAATATCCTGGAATTATCCTAACTTTTTT	7	C	A	eg	--	fg	fg	eg	eg	fg	fg	ee	ee	eg	fg	eg	ee	ee	ef	eg	ee	ee	ee	eg	eg	ee	eg	ee	ee	ee	eg	ef	fg	eg	eg	ef	fg	ee	eg	eg
75	2656	32371	<lmxll>		10	64.751	0.068	RACA1	TGGTCTGACTTGTCACCAAGGAATCCGTCAACCACAGGAGACCCTAACAAG	22	A	C	lm	ll	ll	ll	lm	lm	ll	ll	lm	lm	lm	ll	lm	lm	lm	ll	lm	lm	lm	lm	lm	lm	lm	lm	lm	lm	lm	lm	ll	ll	lm	lm	ll	ll	lm	lm	lm
76	2628	32078	<lmxll>		10	65.387	0.636	RACA1	GGACGGTCTCCTTTCAGGACTCTGTGGCGGCAGTCCAGAGATGTGGAGGTT	24	T	C	ll	lm	--	lm	lm	ll	lm	lm	ll	ll	ll	lm	ll	ll	ll	lm	ll	ll	ll	ll	ll	ll	ll	ll	ll	ll	ll	ll	--	lm	ll	ll	lm	lm	ll	ll	ll
77	5381	68894	<nnxnp>		10	65.985	0.598	sc00303	GTCAGAGTGACTGGCTCTGAAACACAAATGTAGCCGGTTATTATCCAGACA	29	A	G	np	nn	--	np	np	np	np	np	nn	nn	np	np	np	nn	nn	nn	np	nn	nn	nn	np	np	nn	np	nn	--	nn	np	--	np	np	np	np	np	nn	np	np
78	2659	32396	<hkxhk>		10	67.066	1.081	RACA1	CCCTGACCCAACCGGAGGATGCGGCACCATAACCGTGGATGGAAACTCGAG	24	C	A	kk	hh	hk	hk	kk	kk	hk	hk	hk	hk	kk	hk	kk	hk	hk	hh	kk	hk	hk	hk	kk	kk	hk	kk	hk	hk	hk	kk	hh	hk	kk	kk	hk	hk	hk	kk	kk
79	2660	32404	<hkxhk>		10	67.13	0.064	RACA1	GAGCAAAGTGGGGCAAACAATAAAAATCACACAACTATAGATACACAATAT	31	C	T	kk	--	--	hk	kk	kk	hk	hk	hk	hk	kk	hk	kk	hk	hk	hh	kk	hk	hk	hk	kk	kk	hk	kk	hk	hk	hk	kk	--	hk	kk	kk	hk	hk	hk	kk	kk
80	3994	48944	<nnxnp>		10	67.721	0.591	RACA39	GTGGTCTCTGTTTCCAGTTTGCGGTGAATATGTTTCGGACGCTGCCACCAT	28	C	T	nn	np	nn	nn	nn	nn	nn	nn	np	np	nn	nn	nn	np	np	np	nn	np	np	np	nn	nn	np	nn	np	np	np	nn	np	nn	nn	nn	nn	nn	np	nn	nn
81	2667	32450	<hkxhk>		10	68.908	1.187	RACA1	GCCTCTCAGAATGATTCAAAACAGCCTTTTCTGAAGAAAAAGAAACATGTG	41	G	T	kk	hk	--	hk	kk	kk	hk	hk	--	hk	kk	hk	kk	hk	hk	hh	kk	hk	hk	hk	kk	kk	hk	kk	hk	hk	hk	kk	--	hk	kk	kk	hk	hk	hk	kk	kk
82	2648	32273	<nnxnp>		10	69.297	0.389	RACA1	AGAAATGTGATGGATTTGTTTTACCTCTCCTGAAAATCTCAAATCACCTGA	21	T	G	np	--	np	np	np	np	np	np	nn	nn	np	np	np	nn	nn	nn	np	nn	nn	nn	np	np	nn	np	nn	np	nn	np	--	np	np	np	nn	np	nn	np	np
83	2620	31993	<hkxhk>		10	71.233	1.936	RACA1	AGAAAGGGATCAGGCTGAGAAAACTAAAAATGTTTAAAGAAATATTTCAAA	14	C	A	kk	hh	--	hk	kk	kk	hk	hk	hk	hk	kk	hk	kk	hk	hk	hh	kk	hk	hk	hk	kk	kk	hk	kk	hk	kk	hk	kk	hh	hk	kk	kk	hh	hk	hk	kk	kk
84	2606	31812	<lmxll>		10	71.369	0.136	RACA1	GTGCAGCTCCCTGCCTGGTAATGACGTCAAGCCTGTACATTCACTTAGCTC	24	C	A	lm	ll	ll	ll	lm	lm	ll	ll	lm	lm	lm	ll	lm	--	lm	ll	lm	lm	lm	lm	lm	lm	lm	--	lm	lm	lm	lm	ll	ll	lm	lm	ll	ll	lm	lm	lm
85	2563	31266	<lmxll>	2563	10	71.378	0.009	RACA1	TTAAGTGTTTTTAATTCCATCTGCCCCCAAAATATTTGGTCTTTCAATTAA	40	C	A	lm	ll	--	ll	lm	lm	ll	ll	lm	lm	lm	ll	lm	lm	lm	ll	lm	lm	lm	lm	lm	lm	lm	lm	lm	lm	lm	lm	--	ll	lm	lm	ll	ll	lm	lm	lm
86	2607	31813	<lmxll>	2563	10	71.378	0	RACA1	TTGGCTAGATCCTGACTAAGCCTGAAGCAGAAACGAGAGCGAAGTGAATGT	40	G	T	lm	ll	--	ll	lm	lm	ll	ll	lm	lm	lm	ll	lm	lm	lm	ll	lm	lm	lm	lm	lm	lm	lm	lm	lm	lm	lm	lm	--	ll	lm	lm	ll	ll	lm	lm	lm
87	2601	31791	<lmxll>	2601	10	72.178	0.8	RACA1	TTGCTGGATTCAGGTGATCTTGGCTCTGGATCTGTGGAGACCTGAAGAGTC	7	A	G	lm	ll	ll	ll	lm	lm	ll	ll	lm	lm	lm	ll	lm	lm	lm	ll	lm	lm	lm	lm	lm	lm	lm	lm	lm	lm	lm	lm	ll	ll	lm	lm	ll	ll	lm	lm	lm
88	2612	31900	<lmxll>	2601	10	72.178	0	RACA1	GTGATTATTTTGGTCAAAAAAGTCAAACTGTTGTCACCTGCACACAGACAC	23	C	G	lm	ll	ll	ll	lm	lm	ll	ll	lm	lm	lm	ll	lm	lm	lm	ll	lm	lm	lm	lm	lm	lm	lm	lm	lm	lm	lm	lm	ll	ll	lm	lm	ll	ll	lm	lm	lm
89	2625	32070	<lmxll>	2601	10	72.178	0	RACA1	TACCCAGAGTAGTCACAGCTGTATTGATTAATTGGTTTATTTCAAGCATGG	46	C	T	lm	ll	ll	ll	lm	lm	ll	ll	lm	lm	lm	ll	lm	lm	lm	ll	lm	lm	lm	lm	lm	lm	lm	lm	lm	lm	lm	lm	ll	ll	lm	lm	ll	ll	lm	lm	lm
90	2630	32084	<lmxll>	2601	10	72.178	0	RACA1	GAACTCCTGACCTCTGTGAAGAAGAGCTGGCTCACCTCCGTGTTGGTGGCT	38	C	T	lm	ll	ll	ll	lm	lm	ll	ll	lm	lm	lm	ll	lm	lm	lm	ll	lm	lm	lm	lm	lm	lm	lm	lm	lm	lm	lm	lm	ll	ll	lm	lm	ll	ll	lm	lm	lm
91	2635	32106	<lmxll>	2601	10	72.178	0	RACA1	CAGTTTGCTGATTAGAACAAAATGTATTTTATTTAAAAGTAACAGTGTTTA	46	G	T	lm	ll	ll	ll	lm	lm	ll	ll	lm	lm	lm	ll	lm	lm	lm	ll	lm	lm	lm	lm	lm	lm	lm	lm	lm	lm	lm	lm	ll	ll	lm	lm	ll	ll	lm	lm	lm
92	2583	31535	<lmxll>		10	72.432	0.254	RACA1	GCTTCTTAATGACTGCTGGAATGAATCTACGTGAACGCTGTTTTATTGTAA	27	T	C	lm	--	ll	ll	lm	lm	ll	ll	lm	lm	lm	ll	lm	lm	lm	ll	lm	lm	lm	lm	lm	lm	lm	lm	lm	lm	lm	lm	ll	ll	lm	lm	ll	ll	lm	lm	lm
93	2632	32089	<hkxhk>		10	73.366	0.934	RACA1	CACGAGAGCAAGCTTGTGTTAAATGTTCAATCTCATTGGTTCAGTCAGCTT	18	T	C	hh	kk	hh	hk	hh	hh	hk	hk	hk	hk	hh	hk	hh	hk	hk	--	hh	hk	hk	hk	hh	hh	hk	hh	hk	hh	hk	hh	hk	--	hh	hh	kk	hk	hk	hh	hh
1	4209	52137	<nnxnp>		11	0		RACA2	CGTAAGACATTGACTTAACATTGAAACTTGCATTAGTAATTATTGTTCTGC	17	T	A	np	--	--	np	np	np	nn	np	nn	np	np	nn	nn	--	nn	nn	np	np	nn	np	nn	np	np	np	np	nn	nn	np	--	nn	nn	np	--	np	np	nn	nn
2	2973	36399	<hkxhk>		11	0.454	0.454	RACA3	GAATTCTGATACAAGAACTGTATGCAGCTGAACATCTGAGCTGGCTCAGTT	35	C	T	hk	hk	hk	kk	hk	kk	hh	hk	hk	kk	hk	hh	hh	hh	hh	hh	kk	hk	hk	kk	hk	hk	hk	hk	hh	hh	hh	hk	kk	hh	hk	hk	hh	kk	hk	hk	hh
3	2978	36518	<hkxhk>		11	2.129	1.675	RACA3	TCTTCAGGAGGTCTGGGGTGGGAGTGCCAACCACCTCCATGATTCTCTTCA	14	G	T	hk	--	hk	kk	hk	kk	hh	hk	hk	kk	hk	hh	hh	hh	hh	hh	kk	hk	hk	kk	hk	hk	hk	hk	hh	hh	hh	hk	kk	--	hk	hk	hh	kk	hk	hk	hh
4	5360	68564	<hkxhk>		11	2.193	0.064	sc00291	ATTAGCAGCTGTCTCCGCTCAACCTTCGGAGGAGATTACTTAACAGTCTCT	45	G	A	hk	--	--	hh	hk	hh	kk	hk	hk	hh	hk	kk	kk	kk	kk	kk	hh	hk	hk	hh	hk	hk	hk	hk	kk	kk	kk	hk	hh	kk	hk	hk	kk	hh	hk	hk	kk
5	4214	52256	<hkxhk>		11	3.659	1.466	RACA2	ATTCGAAAATCCTTTTTGTTTTCAAAATATAAACAACTTTTCACAATAAAA	12	T	G	hk	hh	hk	kk	hk	kk	hh	hk	hk	kk	hk	hh	hh	hh	hh	hh	kk	hk	hk	kk	hk	hk	hk	hk	hh	hh	hh	hk	kk	hh	hk	hk	hh	kk	hk	hk	hh
6	4211	52173	<nnxnp>		11	5.622	1.963	RACA2	CAGTACTTCTATCACTCTCGGGTGAAACACAGTTGATGAAGTTGTAATTTA	31	C	G	np	nn	np	np	np	np	nn	np	nn	np	np	nn	nn	nn	nn	nn	np	np	--	np	nn	np	np	np	np	nn	nn	np	np	nn	nn	np	nn	nn	np	nn	nn
7	4198	51831	<hkxhk>		11	6.744	1.122	RACA2	GTGTCACTTGAATTTTGTCAGTGCAGACAGAGCCTGATAACATGGTAATTT	28	A	G	hk	kk	hk	hh	hk	hh	kk	hk	hk	hh	hk	kk	kk	kk	kk	kk	hh	hk	hk	hh	hk	hk	hk	hk	hk	kk	kk	hk	hh	kk	hk	hk	kk	hh	hk	hk	kk
8	5358	68471	<hkxhk>		11	8.377	1.633	sc00287	TTGCCCGAAACCAGGAACCCAAACGCACCTTTAACAGTCCACATTATCAAA	44	T	G	hk	kk	hk	hh	hk	hh	kk	hk	hk	hh	hk	kk	kk	kk	kk	kk	hh	hk	hk	hh	hk	hk	hk	hk	kk	kk	kk	hk	hh	kk	hk	hk	kk	hh	hk	hk	kk
9	4160	51352	<hkxhk>		11	8.407	0.03	RACA2	TTCTAAAATAGTTCTCCTTTATTGTCTTTTTTCATTTGTTGCTCTCTCCCA	22	T	C	hk	kk	--	hh	hk	hh	--	hk	hk	hh	hk	kk	kk	kk	kk	kk	hh	hk	hk	hh	hk	hk	hk	hk	kk	kk	kk	hk	hh	kk	hk	hk	kk	hh	hk	hk	kk
10	5279	66918	<hkxhk>		11	9.447	1.04	sc00243	GGATGAAAACATCCCTTAGTCTCCTTTGAAAATGACTTTAAAAAAGAATAT	43	A	C	hk	kk	hk	hh	hk	hh	kk	hk	hk	hh	hk	kk	kk	--	kk	kk	hh	hk	hk	hh	hk	hk	hk	hk	kk	kk	kk	hk	hh	kk	hk	hk	kk	hh	hk	hk	kk
11	5277	66885	<hkxhk>		11	10.157	0.71	sc00243	GCCTTATTGTTCTCTTTATTCGGTTTTGAGGATCATATTTCATGTTTCTAC	18	T	G	hk	kk	hk	hh	hk	hh	kk	hk	hk	hh	hk	kk	kk	kk	kk	kk	hh	hk	hk	hh	hk	hk	hk	hk	kk	kk	kk	hk	hh	kk	hk	hk	kk	--	hk	hk	kk
12	4212	52211	<lmxll>		11	12.312	2.155	RACA2	TGCATGGAGCCGCCATGCAAGGGAGATTGACAGTCATGTTTAGCTACTTCC	11	G	A	ll	ll	--	lm	ll	lm	ll	ll	lm	lm	ll	ll	ll	ll	ll	ll	lm	ll	lm	lm	lm	ll	ll	ll	ll	ll	ll	ll	--	--	lm	ll	lm	lm	ll	lm	ll
13	4219	52313	<nnxnp>		11	15.114	2.802	RACA2	GCTGGCACATACAGTACCTTAACTTCCATTAACATAACCACTTGTCCTGAC	39	G	A	np	nn	np	np	np	np	nn	np	np	np	np	nn	nn	nn	nn	nn	np	np	np	np	nn	np	np	np	np	nn	nn	np	--	nn	nn	np	nn	nn	np	nn	nn
14	4229	52454	<lmxll>		11	18.118	3.004	RACA2	TCAGAGACGTCCAAAATGAAACCGTTTTTTCTTTTGAGGGATGCTTCAGAG	15	A	G	ll	ll	ll	lm	lm	lm	ll	ll	ll	lm	ll	ll	ll	ll	ll	ll	lm	ll	lm	lm	lm	ll	ll	ll	lm	ll	ll	ll	lm	ll	lm	ll	lm	lm	ll	lm	ll
15	4222	52359	<nnxnp>		11	20.918	2.8	RACA2	GAGCTCAGTCGGCGCCCTTTTTTCTCAAATATCTGACGTTCCCTCAGTGCC	36	C	T	np	nn	np	np	np	np	nn	np	np	np	np	nn	np	nn	nn	nn	np	np	np	np	nn	np	np	--	np	nn	nn	np	--	nn	nn	np	nn	nn	np	nn	nn
16	4223	52371	<lmxll>		11	21.146	0.228	RACA2	AAAATTGCAGATAAATCTTGTTTGAATTTAGATTAAATCACATTACAATCA	45	C	T	ll	ll	--	lm	ll	lm	ll	ll	lm	lm	ll	ll	ll	ll	ll	ll	lm	ll	lm	lm	lm	ll	ll	ll	lm	ll	ll	ll	lm	ll	lm	lm	lm	lm	ll	lm	ll
17	4220	52335	<nnxnp>		11	21.946	0.8	RACA2	CTTGGCCCAAGTGGAGAATATCAGGTATCTTAGGGTTGCTGCAGTGATCTG	46	G	A	np	nn	np	np	np	np	nn	np	np	np	np	nn	np	nn	nn	nn	np	np	np	np	nn	np	np	np	np	nn	nn	np	np	nn	nn	np	nn	nn	np	nn	nn
18	4238	52581	<hkxhk>		11	21.964	0.018	RACA2	CTCAAAAGCTCTTGTCAACTGCATCTGGATTGTTTCCAGATCCGTCTGGGT	22	A	T	hk	kk	hk	hh	hh	--	kk	hk	hk	hh	hk	kk	hk	kk	kk	kk	hh	hk	hh	--	hk	hk	hk	hk	hh	kk	kk	hk	hh	kk	hk	hk	hh	hk	hk	hk	kk
19	4237	52574	<hkxhk>		11	22.616	0.652	RACA2	GATATGGACATGTTTGTGCTTCAATGATCCTGATTTGATTTTAGTGATGTC	45	G	T	hk	hh	--	kk	kk	kk	--	hk	hk	kk	hk	hh	hk	hh	hh	hh	kk	hk	kk	kk	hk	hk	hk	hk	kk	hh	hh	--	kk	hh	hk	hk	kk	hk	hk	hk	hh
20	4233	52526	<nnxnp>		11	24.913	2.297	RACA2	CACATTGAACGTTTAAAACATTTGATCGACAAATGTCATATAGCCCTCTTT	10	G	A	np	nn	np	np	np	np	nn	np	np	np	np	nn	np	nn	nn	nn	np	np	np	np	nn	np	np	np	np	nn	nn	np	np	nn	nn	np	np	nn	np	nn	nn
21	4228	52437	<lmxll>		11	25.041	0.128	RACA2	GGACGTGAGAACCGGGGATTGGGACCTCATATTTTTAGCGGAGGATCCTAA	30	A	G	ll	ll	--	lm	lm	lm	ll	ll	ll	lm	ll	ll	ll	ll	ll	ll	lm	ll	lm	lm	lm	ll	ll	ll	lm	ll	ll	ll	lm	ll	lm	ll	lm	lm	ll	lm	ll
22	4236	52543	<nnxnp>		11	25.495	0.454	RACA2	GTTCGTCGTCAGTAAGGTGAGCTTGTAAAAAACGTGTACGGTGGTGCAGTG	12	T	C	np	nn	--	np	np	np	nn	np	np	np	np	nn	np	nn	nn	nn	np	np	np	np	nn	np	np	np	np	nn	nn	np	np	nn	nn	np	np	nn	np	nn	nn
23	4243	52651	<hkxhk>		11	25.704	0.209	RACA2	CCACCTGTTTTGACAGTCATCAGCCTAAGAAACAAGTATTTCTTTAAGTAT	8	T	A	hk	hk	--	kk	kk	kk	hh	hk	hk	hk	hh	hh	kk	hh	hh	hh	kk	hk	kk	kk	hk	hk	hk	hk	kk	hh	hh	hk	kk	hh	hk	hk	kk	hk	hk	hk	hh
24	4232	52516	<hkxhk>		11	26.713	1.009	RACA2	GTCTTTTTTCAAACTGGTAGTGAAGTAAAAAAATATTTTCAGTTTCTTCAC	17	T	C	hk	kk	hk	hh	--	hh	kk	hk	hk	hh	hk	kk	hk	kk	kk	kk	hh	hk	hh	hh	hk	hk	hk	hk	hh	kk	kk	hk	hh	kk	hk	hk	hh	hk	hk	hk	kk
25	4239	52601	<hkxhk>		11	28.031	1.318	RACA2	TCAGATAGTAAGCAAAAACAATCACAAGGGGTTTTAGACATTTTTAATTTC	16	A	C	hk	kk	hk	hh	hh	hh	kk	hk	hk	hh	kk	kk	hk	kk	kk	kk	hh	hk	hh	hh	hk	hk	hk	hk	hh	kk	kk	hk	hh	kk	hk	hk	hh	hk	hk	hk	kk
26	5527	71844	<nnxnp>		11	29.651	1.62	sc05596	GGAGCTCCAGTGTTTATGTTCTTTGATTTACTGTAATTTATCAAACGTTAA	29	A	T	np	np	np	np	np	np	nn	nn	np	np	np	nn	np	nn	nn	nn	np	--	np	np	nn	np	np	np	np	nn	nn	np	np	nn	nn	np	nn	nn	np	nn	nn
27	4241	52614	<hkxhk>		11	30.622	0.971	RACA2	NNNTGGAAAACTGATTAAAAGTTTACACCTTTCTTAANNNGATACAGTTGA	27	C	T	hk	hh	hk	kk	kk	kk	hh	hk	hk	hk	hh	hh	kk	--	hh	hh	kk	hk	kk	kk	hk	hk	hk	hk	kk	hh	hh	hk	kk	hh	hk	hk	kk	hk	hk	hk	hh
28	4245	52657	<hkxhk>		11	30.891	0.269	RACA2	NAATTCCAAGAATTTGAGAAACTATGGTAAAAGAACAAAAACTGTGTAGTT	8	A	T	hk	hh	hk	kk	hk	kk	hh	hk	hk	hk	hh	hh	kk	hh	hh	hh	--	hk	kk	kk	hk	hk	hk	hk	kk	hh	hh	hk	--	hh	hk	hk	kk	hk	hk	hk	hh
29	4150	51157	<lmxll>		11	31.68	0.789	RACA2	GACTTCATATTGGGGCAGGGAAACCATATTTAGAGTACATGTCCACACCAG	25	A	G	ll	ll	ll	lm	lm	lm	ll	ll	ll	ll	ll	ll	lm	ll	ll	ll	lm	ll	lm	lm	lm	ll	ll	lm	lm	ll	ll	ll	lm	ll	lm	ll	lm	lm	ll	lm	ll
30	4244	52652	<hkxhk>		11	32.082	0.402	RACA2	NAATTCTACCACAACACTGAAGTGCAACAAGATAGGATGTGGTTCAGACAT	18	G	A	hk	kk	--	hh	hh	hh	kk	hk	hk	hk	kk	kk	hh	kk	kk	--	hh	hk	hh	hh	hk	hk	hk	--	hh	kk	kk	hk	--	kk	hk	hk	hh	hk	hk	hk	kk
31	4246	52658	<hkxhk>		11	33.057	0.975	RACA2	GTTATGTTAAATCAACAGAAGATGACGTAAATGTCACCACGCCTTTACTGT	17	G	A	hk	hh	hk	kk	kk	kk	hk	hk	hk	hk	hh	hh	kk	hh	hh	hh	kk	hk	kk	kk	hk	hk	hk	kk	kk	hh	hh	hk	kk	hh	hk	hk	kk	hk	hk	hk	hh
32	4131	51023	<lmxll>		11	33.919	0.862	RACA2	CTTCAAATCCAGAAAGAAATACCAAGCACTCACTATGTGTAAATGAAAGTN	43	T	G	ll	ll	ll	lm	lm	lm	ll	ll	ll	ll	ll	ll	lm	ll	ll	ll	lm	ll	lm	lm	lm	ll	ll	lm	lm	ll	ll	ll	lm	ll	lm	ll	lm	lm	ll	lm	ll
33	4251	52731	<hkxhk>		11	34.81	0.891	RACA2	TGAAGGTCTCATCAAGATTTTTTTTCTTCTTATCTCTCTGAAAATTAATTT	30	T	C	hk	hh	--	kk	kk	kk	hk	hk	hk	hk	hh	hh	kk	hh	hh	hh	kk	hk	kk	kk	hk	hk	hk	kk	kk	hh	hh	hk	kk	hk	hk	hk	kk	hk	hk	hk	hh
34	4252	52736	<hkxhk>		11	35.352	0.542	RACA2	GATAGAGTAATGTGGACAGCATCAATGCACTTAACACTTGTAAAACGCTCT	7	T	C	hk	kk	hk	hh	hh	hh	hk	hk	hk	hk	kk	kk	hh	kk	kk	kk	hh	hk	hh	hh	hk	hk	hk	hh	hh	kk	kk	hk	hh	--	hk	hk	hh	hk	hk	hk	kk
35	4137	51054	<hkxhk>		11	37.862	2.51	RACA2	GCAGGCATCAAACAAATAAAACAGGTCACTCAGAAAAAAAAGAAGAGAATT	11	A	G	hk	--	hk	hk	hh	hh	hk	hk	hk	hk	kk	kk	hh	hk	kk	kk	hh	hk	hh	hh	hk	hk	hk	hh	hh	kk	kk	hk	hh	hk	hk	hk	hh	hk	hk	hk	kk
36	4134	51043	<hkxhk>		11	37.95	0.088	RACA2	ATACAAAGTCCGAGGGCTTTGTAATTTAGCCAAATTTTTCTAGACGGATTT	9	C	T	hk	kk	hk	hk	hh	hh	hk	hk	hk	hk	kk	kk	hh	hk	kk	kk	hh	hk	hh	hh	hk	hk	hk	hh	hh	kk	kk	hk	hh	kk	hk	hk	hh	hk	hk	hk	kk
37	4135	51047	<efxeg>		11	38.04	0.09	RACA2	GGTTAATACGGCTGATATCGACCTGATATAATCAAGTTTTTTAAAGCTAGA	12	T	A	eg	ee	--	ef	fg	fg	eg	eg	eg	eg	ee	ee	fg	eg	ee	ee	fg	eg	fg	fg	ef	eg	eg	fg	fg	ee	ee	eg	fg	ee	ef	eg	fg	ef	eg	ef	ee
38	4249	52705	<hkxhk>		11	38.051	0.011	RACA2	ATTTATTAACATCTCCTCAAGTTTGCCTGCATACCTAGAACACTCCATCTT	35	T	A	hk	kk	hk	hh	hh	hh	hk	hk	hk	hk	kk	kk	hh	kk	kk	kk	hh	hk	hh	hh	hk	hk	hk	hh	hh	kk	kk	hk	--	kk	hk	hk	hh	hk	hk	hk	kk
39	4141	51077	<hkxhk>		11	40.377	2.326	RACA2	GTTAACCCACGTCTGGGATCTGTCAATCCTCGTCTGGGATCCGTTAACCCT	41	C	T	hk	--	hk	hk	hh	hh	hk	hk	hk	hk	kk	kk	hh	hk	kk	kk	hh	hk	hh	hh	hk	hk	hk	hh	hh	hk	kk	hk	hh	kk	hk	hk	hh	hk	hk	hk	kk
40	4151	51163	<hkxhk>		11	43.096	2.719	RACA2	ACATTTTGAATACGCTGCTATTTACTCATGGTCAATAGTATTTTAGCTCAA	12	C	A	hk	kk	hk	hk	hh	hh	hk	hk	hk	kk	kk	kk	hh	hk	kk	kk	hh	hk	hh	hh	hk	hk	hk	hh	hh	hk	hk	hk	hh	hk	hk	hk	hh	hk	hk	hk	kk
41	4155	51236	<hkxhk>		11	44.574	1.478	RACA2	TTAAAATGTTTTTGCATTGATGCGATACATTAAAATGACTCGAGCAGACCA	7	G	T	hk	kk	hk	hk	hh	hh	hk	hk	hk	kk	hk	kk	hh	hk	kk	kk	hh	hk	hh	hh	hk	hk	hk	hh	hh	hk	hk	hk	hh	hk	hk	hk	hh	hk	hk	hk	kk
42	4147	51119	<nnxnp>		11	46.478	1.904	RACA2	CTTACCTCGTATTTGCATCTAGATTTTCATATGTCTGATGCAATGTTCCTC	36	G	A	np	nn	np	nn	np	np	np	np	np	np	nn	nn	np	np	nn	nn	np	np	np	np	nn	np	np	np	np	np	np	np	np	np	nn	np	np	nn	np	nn	nn
43	4143	51100	<nnxnp>		11	48.618	2.14	RACA2	CCTCAGTCACCGGCCAGCAGTTACGGGGGGCGGGTCGAAACAGAAGAGAAA	23	C	T	np	nn	np	nn	np	np	np	np	np	np	nn	nn	np	np	nn	nn	np	np	np	np	nn	np	np	np	np	np	np	np	np	nn	nn	np	np	nn	np	nn	nn
44	4161	51378	<nnxnp>		11	59.058	10.44	RACA2	TTGGTCTTGGCCATAGTGGAGTTTGGTGTGTGACAGTTTGAGGTTGTGGAC	36	C	T	np	nn	np	nn	np	np	np	np	np	nn	nn	np	np	np	nn	nn	np	np	--	np	nn	np	np	np	np	--	np	np	--	np	nn	nn	np	nn	np	nn	nn
45	685	7771	<nnxnp>		11	61.863	2.805	RACA20	CTCTGAGATTCTGGTTTCTTGGAACCAGCAGGTACTTCCTGTTTGGANNNN	10	T	C	np	nn	np	nn	np	np	np	np	np	nn	nn	np	np	np	nn	np	np	np	np	np	nn	np	np	np	np	np	np	np	np	np	nn	nn	np	nn	np	np	nn
46	4175	51664	<nnxnp>		11	67.815	5.952	RACA2	GATGATGAAAACATTGAATGAGTTTTCTTTTTATTATATTTTTGTCACAAA	5	C	T	np	nn	np	nn	nn	np	np	np	np	nn	nn	np	np	np	nn	np	np	np	np	np	nn	np	np	np	np	np	np	np	np	np	nn	nn	np	nn	np	np	nn
47	4174	51650	<nnxnp>	4174	11	67.818	0.003	RACA2	GGTACCACATCTGGTACCGCGTCCAGTGCCAGGTTAGGGTTAGGGTGCCTT	23	T	C	np	nn	np	nn	nn	np	np	np	np	nn	nn	np	np	np	nn	np	np	np	np	np	nn	np	np	np	np	np	np	np	np	np	nn	nn	np	nn	np	np	nn
48	4185	51741	<nnxnp>	4174	11	67.818	0	RACA2	AAATTCTTACATAATATAGTATTTACAACATAACATTTCATACACAACCTT	15	G	A	np	nn	np	nn	nn	np	np	np	np	nn	nn	np	np	np	nn	np	np	np	np	np	nn	np	np	np	np	np	np	np	np	np	nn	nn	np	nn	np	np	nn
49	4191	51793	<nnxnp>	4174	11	67.818	0	RACA2	GCTGGTTATTTCATAAAAATAAACTCTGGTTTAAACTATTATTAAAATTTT	36	A	T	np	nn	np	nn	nn	np	np	np	np	nn	nn	np	np	np	nn	np	np	np	np	np	nn	np	np	np	np	np	np	np	np	np	nn	nn	np	nn	np	np	nn
50	4192	51794	<nnxnp>	4174	11	67.818	0	RACA2	TCTGCCGTACCTGCAGCTCTCCGGCGTTGCTGTCTCTGTTCACGTCGTAAA	5	G	C	np	nn	np	nn	nn	np	np	np	np	nn	nn	np	np	np	nn	np	np	np	np	np	nn	np	np	np	np	np	np	np	np	np	nn	nn	np	nn	np	np	nn
51	4164	51549	<nnxnp>		11	68.122	0.304	RACA2	TTTGTAAATGCAGAGTTTTATGTTTGCACAAAATATGAAAATGCATGTTGT	12	G	A	np	nn	--	nn	nn	np	np	np	np	nn	nn	np	np	np	nn	np	np	np	np	np	nn	np	np	np	np	np	np	np	np	np	nn	nn	np	nn	np	np	nn
52	4183	51734	<nnxnp>		11	68.161	0.039	RACA2	CTAAAACTCTGATACTTCGGTAACATAAATGCTAATATACGATTCACATGT	31	C	A	np	nn	--	nn	nn	np	np	np	np	nn	nn	np	np	np	nn	np	np	np	np	np	nn	np	np	np	np	np	np	np	np	np	nn	nn	np	nn	np	np	nn
53	4177	51691	<nnxnp>		11	68.163	0.002	RACA2	AAAGCAATTCCAGGTCAGATCATAAACAAGTACACATAAGATTTAAAACAA	39	T	G	np	--	np	nn	nn	np	np	np	np	nn	nn	np	np	np	nn	np	np	np	np	np	nn	np	np	np	np	np	--	np	--	np	--	nn	np	nn	np	np	nn
54	4195	51806	<nnxnp>		11	68.528	0.365	RACA2	AGAGCCTGAGATCCACAGATCAGCTGATCCAGAAGATTCACAAACCAAAAG	34	A	G	np	np	--	nn	nn	np	np	np	np	nn	nn	np	np	np	--	np	np	np	np	np	nn	np	np	np	np	np	np	np	np	np	nn	nn	np	nn	np	np	nn
55	4196	51812	<hkxhk>		11	68.726	0.198	RACA2	TTAGTTTTCACATCACGTCTAGCAGTAGATGTTTCCAGGAATAATTTTAGA	27	G	A	kk	hk	kk	hk	hh	hk	kk	hk	kk	hk	hh	kk	hk	kk	hh	kk	kk	kk	hk	kk	hh	kk	kk	hk	hk	hk	kk	kk	hk	kk	hh	hk	hk	hk	hk	kk	hk
56	4178	51692	<nnxnp>		11	68.75	0.024	RACA2	GACAATATTAGGACCTATTAGGTCATAACTGAAAGGTGTAGCGAGTCCTGA	13	C	T	np	--	np	nn	nn	np	np	np	np	nn	nn	np	np	np	nn	np	np	np	np	np	nn	np	np	np	np	np	np	np	nn	np	nn	nn	np	nn	np	np	nn
57	4208	52049	<lmxll>		11	69.548	0.798	RACA2	GAATTCACTTTCAAAGGCACAGCAGCTCAGAGAAAGGCGACAGAGACCGTT	43	A	G	lm	lm	--	lm	ll	ll	lm	ll	lm	lm	ll	lm	ll	lm	ll	lm	lm	--	ll	lm	ll	lm	lm	ll	ll	ll	lm	lm	ll	lm	ll	lm	ll	lm	ll	lm	lm
58	4200	51895	<lmxll>		11	69.561	0.013	RACA2	TCCACCAGGACTATTAGAGGAAATAACTTAACTCTAAAACTACACATCTGA	25	A	G	lm	lm	lm	lm	ll	ll	lm	ll	lm	lm	ll	lm	ll	lm	ll	lm	lm	lm	ll	lm	--	lm	lm	ll	ll	ll	lm	lm	--	lm	ll	lm	ll	lm	ll	--	lm
59	4204	51942	<lmxll>		11	69.565	0.004	RACA2	AGATCCGGATCAGTCCAGGTAGAAAGCAGACCTTTAATGTACCGTCTGGGC	21	G	A	lm	lm	--	lm	ll	ll	lm	ll	lm	lm	ll	lm	ll	lm	ll	lm	lm	lm	ll	lm	ll	lm	lm	ll	ll	ll	lm	lm	ll	lm	ll	lm	ll	lm	ll	lm	lm
60	4206	51960	<lmxll>		11	69.566	0.001	RACA2	ACTGTTACAGGTAGAGTTCCAGCCGTTTTCTCTCATGTCACGCTCACCTGC	23	C	T	lm	lm	lm	lm	--	ll	lm	ll	lm	lm	ll	lm	ll	lm	ll	lm	lm	lm	ll	lm	ll	lm	lm	ll	ll	ll	lm	lm	ll	lm	ll	lm	ll	lm	ll	lm	lm
61	4189	51786	<lmxll>	4189	11	69.566	0	RACA2	GCAAAATAGAAAATTAGATGTTCTAATGCAGTAAAACTCCTCTCTGCAGAC	9	A	G	lm	lm	lm	lm	ll	ll	lm	ll	lm	lm	ll	lm	ll	lm	ll	lm	lm	lm	ll	lm	ll	lm	lm	ll	ll	ll	lm	lm	--	lm	ll	lm	ll	lm	ll	lm	lm
62	4199	51893	<lmxll>	4189	11	69.566	0	RACA2	AAAAGAGGAACAACACGTGAATCCCACTGCACCAAACAAGAGCACGGACAG	6	G	C	lm	lm	lm	lm	ll	ll	lm	ll	lm	lm	ll	lm	ll	lm	ll	lm	lm	lm	ll	lm	ll	lm	lm	ll	ll	ll	lm	lm	--	lm	ll	lm	ll	lm	ll	lm	lm
63	4197	51829	<lmxll>	4197	11	69.567	0.001	RACA2	TTAATTTTTCAGTTTTTAGCTGAAGTCTAAAAACTGATGTGGTTTCTTTAA	24	G	A	lm	lm	lm	lm	ll	ll	lm	ll	lm	lm	ll	lm	ll	lm	ll	lm	lm	lm	ll	lm	ll	lm	lm	ll	ll	ll	lm	lm	ll	lm	ll	lm	ll	lm	ll	lm	lm
64	4202	51935	<lmxll>	4197	11	69.567	0	RACA2	GGAACAAAGTTTGAACCCCGAGTGTAAACCCAGTATTCCTGAAGACTGTAG	35	T	G	lm	lm	lm	lm	ll	ll	lm	ll	lm	lm	ll	lm	ll	lm	ll	lm	lm	lm	ll	lm	ll	lm	lm	ll	ll	ll	lm	lm	ll	lm	ll	lm	ll	lm	ll	lm	lm
65	4205	51946	<lmxll>		11	69.572	0.005	RACA2	GCAGTGAAATAAACGTCTGGAGTCCAATCTGAGGACAAACACATTCCTGAA	35	C	T	lm	lm	lm	lm	ll	ll	lm	ll	lm	lm	ll	lm	ll	lm	ll	lm	lm	lm	ll	lm	ll	lm	lm	--	ll	ll	lm	lm	--	lm	--	lm	ll	lm	ll	lm	lm
66	4194	51803	<lmxll>		11	69.572	0	RACA2	TCTACTTTGGGTTTTGGCTGTGATGCTCAAAGTCTCAATAACCAGAGCTTT	29	A	C	lm	lm	lm	lm	ll	ll	lm	ll	lm	lm	ll	lm	ll	lm	ll	lm	lm	lm	ll	lm	ll	lm	lm	ll	ll	ll	lm	lm	ll	lm	--	lm	ll	lm	ll	lm	lm
67	4203	51936	<lmxll>		11	69.575	0.003	RACA2	TTCCTCCCCTCGGTTGACTTTGGGAAGGTGTTTTTCCAAACAAACCAGACT	7	C	A	lm	lm	lm	lm	ll	ll	lm	ll	lm	lm	ll	lm	ll	lm	ll	lm	lm	lm	ll	lm	ll	lm	lm	ll	ll	ll	lm	lm	ll	lm	ll	lm	ll	lm	--	lm	lm
68	4193	51800	<lmxll>		11	69.576	0.001	RACA2	TCTCACCTCCTTTATTGAGACGATTCACTTTAGTCTCATTTGATCTTTAAA	45	T	C	lm	lm	lm	lm	ll	ll	lm	ll	lm	lm	ll	lm	ll	lm	ll	lm	lm	lm	ll	lm	ll	lm	lm	ll	ll	ll	lm	lm	--	lm	--	lm	ll	lm	ll	lm	lm
69	4168	51570	<nnxnp>		11	69.725	0.149	RACA2	TTGAGAAACCAAACCCCCCTGAGCTCAGAGACGGAGTTTCACGCCAACGCG	5	A	G	np	nn	np	nn	nn	np	np	np	np	nn	nn	np	np	np	nn	np	np	np	np	np	nn	np	np	np	np	np	np	np	np	np	nn	nn	np	nn	np	np	nn
70	5472	70685	<nnxnp>		11	71.656	1.931	sc00647	NAATTCTTAGCGTCTTTTTCTTTGGGTTTGCGTCTTTTCCATCTGTAGTAA	21	C	T	np	nn	np	nn	nn	np	np	np	--	nn	nn	np	np	np	nn	np	np	np	np	np	nn	np	np	np	np	np	--	np	np	np	nn	nn	np	nn	np	np	nn
71	4171	51602	<nnxnp>		11	72.7	1.044	RACA2	TTTTGTTAATAAAGTGAAAAAAATGGTTTTATTTAAACAAAATCTGCTCCA	20	A	T	np	nn	np	nn	nn	np	np	np	np	nn	nn	np	np	np	nn	np	np	np	np	np	nn	np	np	np	np	np	np	np	np	np	nn	nn	np	nn	np	np	nn
1	2886	35193	<lmxll>		12	0		RACA31	TTAGCCCAGGAGTCAACAATCCCTTCACATATGCTGGCATAACTCGCCCGG	29	T	C	ll	lm	ll	ll	lm	ll	ll	lm	lm	lm	lm	lm	ll	ll	ll	lm	lm	lm	ll	ll	lm	lm	ll	ll	ll	lm	lm	ll	lm	ll	lm	lm	lm	ll	lm	lm	ll
2	2900	35355	<lmxll>		12	3.336	3.336	RACA31	NAATTCTTTGCGAAAAGCAACAATGCATTGATGCCCTCTACATTGGCAAAC	40	C	T	lm	ll	ll	lm	ll	lm	lm	ll	ll	ll	ll	--	ll	lm	lm	ll	ll	ll	ll	lm	ll	ll	lm	--	lm	ll	ll	lm	--	lm	ll	ll	ll	lm	ll	ll	lm
3	2903	35385	<lmxll>		12	4.979	1.643	RACA31	ATTAATAAATAGGCTTTTAATAGATTCTTTGACTTTCATTGACATGATTTG	36	C	G	lm	ll	ll	lm	ll	lm	lm	ll	ll	ll	ll	ll	ll	lm	lm	ll	ll	ll	lm	lm	ll	ll	lm	lm	lm	ll	ll	lm	ll	lm	ll	ll	ll	lm	ll	ll	lm
4	2895	35328	<lmxll>		12	8.113	3.134	RACA31	GTGTCTGAAAGATCCATGTGGCCGACACGTTTGACAGCCGTCTGATATGTG	7	A	T	ll	lm	lm	ll	lm	ll	ll	lm	lm	lm	lm	lm	ll	ll	ll	lm	lm	lm	ll	ll	lm	lm	ll	ll	ll	lm	lm	ll	lm	ll	lm	lm	lm	ll	lm	lm	ll
5	2893	35317	<lmxll>		12	9.925	1.812	RACA31	GCCACCCTGCCTGTTTTCCTGCCCTTCCTGCCCTGCTTGCTGCTGATTACC	40	T	C	lm	ll	ll	lm	--	lm	lm	--	ll	ll	ll	ll	lm	lm	lm	ll	ll	ll	lm	lm	ll	ll	lm	lm	lm	--	ll	lm	ll	lm	ll	ll	ll	lm	ll	ll	lm
6	2899	35346	<lmxll>		12	11.3	1.375	RACA31	AATTTATTTAACAACAGCAAAATACTTTATTCAGTTCTCCTGCTTATTGTT	41	G	A	lm	ll	ll	lm	ll	--	lm	ll	ll	ll	ll	ll	ll	lm	lm	ll	ll	ll	lm	lm	ll	ll	lm	lm	lm	ll	ll	lm	ll	lm	ll	ll	ll	lm	ll	ll	lm
7	2897	35336	<lmxll>	2897	12	11.313	0.013	RACA31	GTCTGTGCAAACTAAAGAACTCCAGGACAAGATCAAGCATTTGGAAGATGT	5	T	C	lm	ll	ll	lm	ll	lm	lm	ll	ll	ll	ll	ll	ll	lm	lm	ll	ll	ll	lm	lm	ll	ll	lm	lm	lm	ll	ll	lm	ll	lm	ll	ll	ll	lm	ll	ll	lm
8	2905	35401	<lmxll>	2897	12	11.313	0	RACA31	GTGAGAGAGTGATTGAAGCTTTGTATTTAGAAATCTTAGCTTGATTGAGGT	15	A	C	lm	ll	ll	lm	ll	lm	lm	ll	ll	ll	ll	ll	ll	lm	lm	ll	ll	ll	lm	lm	ll	ll	lm	lm	lm	ll	ll	lm	ll	lm	ll	ll	ll	lm	ll	ll	lm
9	2904	35400	<lmxll>		12	11.352	0.039	RACA31	TAATCTGTGCTGAGCGATTACATAACCCGTCTACTGCCTTTCACTCTCTCT	32	A	G	lm	--	ll	lm	ll	lm	lm	ll	ll	ll	ll	ll	ll	lm	lm	ll	ll	ll	lm	lm	ll	ll	lm	lm	lm	ll	--	lm	ll	lm	ll	ll	ll	lm	ll	ll	lm
10	2898	35338	<lmxll>		12	11.377	0.025	RACA31	ATCGGTGATATTAAGTAAAGGAAACGGGTCTTTCCCGTGTTGAATCTTTAC	41	G	A	lm	ll	--	lm	ll	lm	lm	ll	ll	ll	ll	ll	ll	lm	--	ll	ll	ll	lm	lm	ll	ll	lm	lm	lm	ll	ll	lm	--	lm	ll	ll	ll	lm	ll	ll	lm
11	2902	35384	<lmxll>		12	12.37	0.993	RACA31	CATGAGTAAAAGTGATTTGCTGTCTAACCTGAGGGCCTGGGGCTGTTCGAG	19	C	T	ll	lm	lm	ll	lm	ll	ll	lm	lm	lm	lm	lm	lm	ll	ll	lm	lm	lm	ll	ll	lm	lm	ll	ll	ll	lm	lm	ll	lm	ll	lm	lm	lm	ll	lm	lm	ll
12	2906	35403	<lmxll>		12	15.291	2.921	RACA31	ATACATTCACTTTGTATTTTGGATGTGGATGGCTGTAAGAGTCCTTGTCAC	13	G	A	lm	ll	--	lm	ll	lm	lm	ll	ll	ll	ll	ll	ll	lm	lm	ll	ll	ll	lm	lm	ll	ll	lm	lm	lm	ll	ll	lm	--	lm	ll	ll	ll	lm	--	ll	lm
13	2713	32909	<nnxnp>		12	16.964	1.673	RACA31	GCCAACCAGTATTTGCTTCATATGTCCAGGTCACATCACAAACACTGGGAT	8	G	A	np	nn	nn	nn	np	nn	np	np	nn	nn	np	nn	np	np	nn	nn	nn	np	nn	nn	np	np	np	np	np	nn	np	np	nn	np	nn	nn	nn	nn	np	nn	np
14	2702	32831	<lmxll>		12	17.351	0.387	RACA31	TGGTTCTTGATTCCATTTTTTTATGACAGTGGTGTATTGTGGAGCGAGTGA	5	C	A	lm	ll	ll	lm	ll	lm	lm	ll	ll	ll	ll	ll	ll	lm	lm	ll	ll	ll	lm	lm	ll	ll	lm	lm	lm	ll	ll	lm	ll	lm	ll	ll	ll	lm	ll	ll	lm
15	2714	32915	<nnxnp>		12	17.992	0.641	RACA31	ATTAACTAAGACAGGTTGTCCATTGATTCTTAGCTATCCTCAGAGAGAACG	46	A	G	np	nn	nn	nn	np	nn	np	np	nn	nn	np	nn	np	np	nn	nn	nn	np	nn	nn	np	np	np	np	nn	nn	np	np	nn	np	nn	nn	nn	nn	np	nn	np
16	2708	32887	<hkxhk>		12	19.072	1.08	RACA31	CAGCAATTTTCTGCACAAGTATTGTCACAGCCTGAGTTTATGTTTTAAAGG	14	A	T	kk	hh	hh	hk	hk	hk	kk	kk	hh	hh	hk	hh	hk	kk	hk	hh	hh	hk	hk	hk	hk	hk	kk	kk	kk	hk	hk	kk	hh	kk	hh	hh	hh	hk	hk	hh	kk
17	2712	32908	<nnxnp>		12	20.848	1.776	RACA31	CTTCTCACTCATCTGGGTTTGTGATTGTGCATAAAAAATAAGTGATCACTG	35	A	G	np	nn	nn	nn	np	nn	np	np	nn	--	np	nn	np	np	nn	nn	nn	np	nn	nn	np	np	np	np	np	nn	np	np	nn	np	nn	nn	nn	nn	np	nn	np
18	2727	33170	<efxeg>		12	23.813	2.965	RACA31	TTCTAAAATGGTTCAAAAAAATTCAAATTTACCAGTATATGACATTTGGTC	3	T	A	fg	ee	--	ef	eg	ef	fg	fg	ee	ee	eg	ee	eg	fg	ee	ee	ee	ee	ef	ef	eg	eg	fg	fg	ef	ee	ee	fg	--	--	ee	ee	ee	ef	ee	ee	fg
19	2782	33732	<lmxll>		12	29.157	5.344	RACA31	GAAGTGGTTGTCGGCGTGATGCGGAGATAAATACTGTTATGCAGATGGCGT	24	A	C	lm	ll	--	lm	ll	lm	lm	ll	ll	ll	ll	lm	ll	ll	ll	ll	ll	ll	lm	lm	ll	lm	lm	lm	lm	ll	ll	lm	--	ll	lm	ll	ll	lm	ll	lm	lm
20	2747	33376	<lmxll>		12	31.064	1.907	RACA31	TGTCAGTTTTGTCCCAACTTTGCAGCTTTACTTACAGCTAAATCTCATCAC	40	A	T	ll	lm	lm	ll	lm	ll	ll	ll	lm	lm	lm	lm	lm	lm	lm	lm	lm	lm	ll	ll	lm	lm	ll	ll	ll	lm	lm	ll	lm	lm	lm	lm	lm	ll	lm	ll	ll
21	2754	33409	<lmxll>		12	31.771	0.707	RACA31	TAAATGGGGCTGCCTTAAAAAGCTTTCAGAACCAATCTGAATCCTTCCCTT	24	T	G	lm	ll	--	lm	ll	lm	lm	lm	ll	ll	ll	ll	ll	ll	ll	ll	ll	ll	lm	lm	ll	ll	lm	lm	lm	ll	ll	lm	ll	ll	ll	ll	ll	lm	ll	lm	lm
22	2766	33585	<lmxll>		12	32.5	0.729	RACA31	TACTTCTTGGCCAACTTGCTAACCAATTTGCATTGGTGCAACGCAGATCCC	13	A	G	lm	ll	ll	lm	ll	lm	lm	lm	ll	ll	ll	lm	ll	ll	ll	ll	ll	ll	lm	lm	ll	ll	lm	lm	lm	ll	ll	lm	ll	ll	ll	ll	ll	lm	ll	lm	lm
23	2768	33598	<lmxll>		12	32.5	0	RACA31	GCTGTGGTGGGCGGAGCTTAACAGAGCCCTCTGCTATTAGAAATCAAACAG	17	T	C	ll	lm	lm	ll	lm	ll	ll	ll	lm	lm	lm	ll	lm	lm	lm	lm	lm	lm	ll	ll	lm	lm	ll	ll	ll	lm	lm	ll	lm	lm	lm	lm	lm	ll	lm	ll	ll
24	2758	33486	<efxeg>		12	32.616	0.116	RACA31	CTGATTTAGGGGAAAAATATCATCCACTGCACAGACGAAAGCCAAGGAGGA	31	G	C	fg	--	ee	ef	eg	ef	--	fg	ee	eg	eg	ee	eg	eg	ee	ee	ee	ee	ef	ef	eg	eg	fg	fg	ef	ee	eg	fg	ee	eg	ee	ee	ee	ef	ee	ef	--
25	2765	33584	<lmxll>		12	32.718	0.102	RACA31	TTTCTCTCTGTTCTCTCCAAAGCTTTGCTGCTCTAAAGCCTCTGATCTGTC	34	A	T	lm	ll	--	lm	ll	lm	lm	lm	ll	ll	ll	lm	ll	ll	ll	ll	ll	ll	lm	lm	ll	ll	lm	lm	lm	ll	ll	--	ll	ll	ll	ll	ll	lm	ll	lm	lm
26	2764	33558	<lmxll>		12	32.809	0.091	RACA31	GTGTTGCAGCGGCGGCGCAGAGCAGACAGTCACCACCAGAGGGCACTGCTG	20	A	T	lm	ll	--	lm	ll	lm	lm	lm	ll	ll	ll	lm	ll	ll	ll	ll	ll	ll	lm	lm	ll	ll	lm	lm	lm	ll	ll	lm	--	ll	ll	ll	ll	lm	ll	lm	lm
27	2763	33547	<lmxll>		12	32.951	0.142	RACA31	GTTTTAATGCATGCGACCCTTACCTTATGCAAGAAACAAGTCAGTTTTTTA	36	C	T	lm	ll	ll	lm	ll	lm	lm	lm	ll	ll	ll	lm	ll	ll	ll	ll	ll	ll	lm	lm	ll	ll	lm	lm	lm	ll	ll	lm	ll	ll	ll	ll	ll	lm	ll	lm	lm
28	2762	33521	<hkxhk>		12	33.028	0.077	RACA31	TGTATTTGTTCCATTTTCCAATAATTGTCCCAACAGCTGATCCATTATTAT	26	G	A	hh	kk	kk	hk	hk	hk	hh	hh	kk	hk	hk	kk	hk	hk	kk	kk	kk	kk	hk	hk	hk	hk	hh	hh	hk	kk	hk	hh	kk	hk	kk	kk	kk	hk	kk	hk	hh
29	2751	33401	<lmxll>		12	33.064	0.036	RACA31	GCTGGTTGAAAGATAAAAGCTGAAAGGTTGCCAAGAAAAAGAAACTGCTGT	26	G	A	lm	ll	--	lm	ll	lm	lm	lm	ll	ll	ll	ll	ll	ll	ll	ll	ll	ll	lm	lm	ll	ll	lm	lm	lm	ll	ll	lm	ll	ll	ll	ll	ll	lm	ll	lm	lm
30	2749	33387	<lmxll>	2749	12	33.082	0.018	RACA31	CTCTGCGGTAACCCTTCCTCAGGACAGATGGATAGAGGTCCACAATAGAAG	28	T	C	lm	ll	ll	lm	ll	lm	lm	lm	ll	ll	ll	ll	ll	ll	ll	ll	ll	ll	lm	lm	ll	ll	lm	lm	lm	ll	ll	lm	ll	ll	ll	ll	ll	lm	ll	lm	lm
31	2756	33428	<lmxll>	2749	12	33.082	0	RACA31	CACAGGGATAATGGCCAGAGTTTGGTACAAAAATTAACAGGTTTTCAACCT	39	G	A	lm	ll	ll	lm	ll	lm	lm	lm	ll	ll	ll	ll	ll	ll	ll	ll	ll	ll	lm	lm	ll	ll	lm	lm	lm	ll	ll	lm	ll	ll	ll	ll	ll	lm	ll	lm	lm
32	2745	33365	<hkxhk>		12	34.249	1.167	RACA31	GGCAAATGATAAATACACTGCAATATAAATATATATTTTTTATGTTTAAAA	12	A	T	hh	kk	kk	hk	hk	hk	hh	hh	kk	hk	hk	kk	hk	hk	kk	kk	kk	kk	hk	hk	hk	hk	hh	hh	hk	kk	hk	hh	kk	hk	kk	kk	kk	hk	kk	hk	hh
33	2734	33229	<nnxnp>		12	34.35	0.101	RACA31	TTTGACAGCTCTTTAACTTTCCCAATGAATCAATATCCATAGATGTTAGTG	39	G	T	nn	np	np	np	nn	np	nn	nn	np	np	nn	np	nn	nn	np	np	np	np	np	np	nn	nn	nn	nn	np	np	nn	nn	np	nn	np	np	np	np	np	np	nn
34	2731	33208	<nnxnp>		12	34.956	0.606	RACA31	CTTCAGTCATTGGACAGGAATTACGAGGGCGGGGCAAAGCAATGAGAAAAA	42	T	C	nn	np	--	np	nn	np	nn	nn	np	np	nn	np	nn	nn	np	np	np	np	np	np	nn	nn	nn	nn	np	np	nn	nn	np	nn	np	np	np	np	np	np	nn
35	2730	33207	<nnxnp>		12	35.139	0.183	RACA31	AAGCTTAATAGAGCAATCAATAATTGATCACTAAAAATAGAGATTGACCTA	11	A	C	nn	np	np	np	nn	np	nn	nn	np	np	nn	np	nn	nn	np	np	np	np	np	np	nn	nn	nn	nn	np	np	nn	nn	np	nn	np	np	np	np	np	np	nn
36	2750	33389	<hkxhk>		12	36.261	1.122	RACA31	CGCTGTTGGCTGAGATGGGTAACCAGCCATGTGCAGGACTGGCTTAGTACA	4	G	C	hk	hk	hk	kk	hh	kk	hk	hk	hk	hh	hh	hk	hh	hh	hk	hk	hk	hk	kk	kk	hh	hh	hk	hk	kk	hk	--	hk	hk	hh	hk	hk	hk	kk	hk	kk	hk
37	2732	33222	<nnxnp>		12	36.635	0.374	RACA31	TACTGGCTCTGATTTCTAATAAATAATATAAAATTGCAGGTAGTTGTGAAC	41	A	T	nn	np	np	np	nn	np	nn	nn	np	np	nn	np	nn	nn	np	np	np	np	np	np	nn	nn	nn	nn	np	np	nn	nn	np	nn	np	np	np	np	np	np	nn
38	2735	33259	<nnxnp>		12	37.871	1.236	RACA31	GTTTAATAAGTGTTANGCAGGACCTCTGTAAGGGGAAAGCGGAGGAAGTTG	13	G	T	nn	np	np	np	nn	np	nn	nn	np	np	nn	np	nn	nn	np	np	np	np	np	np	nn	nn	nn	nn	np	np	nn	nn	np	nn	np	np	np	np	np	np	nn
39	2742	33343	<lmxll>		12	38.78	0.909	RACA31	TTTGTTAATTTATAAACTGTTGTAGCATTTAATGTAGCTTTGAGTGTGACA	45	G	C	ll	lm	--	ll	lm	ll	ll	ll	lm	lm	lm	lm	lm	ll	lm	lm	lm	lm	ll	ll	lm	lm	ll	ll	ll	lm	lm	ll	lm	lm	lm	lm	lm	ll	lm	ll	ll
40	2744	33357	<lmxll>		12	39.155	0.375	RACA31	GAAGCAGCCAGAGGATAACATTCTCAACTCCATGGACCGCACTCAAACTTA	17	A	G	ll	lm	lm	ll	lm	ll	ll	ll	lm	lm	lm	lm	lm	lm	lm	lm	lm	lm	ll	ll	lm	lm	ll	ll	ll	lm	lm	ll	lm	lm	lm	lm	lm	ll	lm	ll	ll
41	2743	33348	<nnxnp>		12	39.763	0.608	RACA31	GAAATATTTTACTGCTTTGATCAGAGGCTCATTGTAGAAATAATGGAGTGT	13	A	G	nn	np	np	np	nn	np	nn	nn	np	nn	nn	np	nn	nn	np	np	np	np	np	np	--	nn	nn	nn	np	np	nn	nn	np	nn	np	np	np	np	np	np	nn
42	2741	33332	<nnxnp>		12	40.082	0.319	RACA31	TGTTGCATTTGTCTTAAGATGTATGACATGTATAAAATACTTTAAGATTAA	29	A	G	nn	np	np	np	nn	np	nn	nn	np	nn	nn	np	nn	nn	np	np	np	np	np	np	nn	nn	nn	nn	np	np	nn	nn	np	nn	np	np	np	np	np	np	nn
43	2755	33416	<efxeg>		12	41.373	1.291	RACA31	GTACTGTAAAGAAGCAAATGAGAATTACAGCAACTTGAATTATATCAGCTT	14	C	T	ef	eg	eg	fg	ee	fg	ef	ef	eg	ee	ee	eg	ee	ee	--	eg	eg	eg	fg	fg	ee	ee	ef	ef	fg	eg	ee	ef	eg	ee	eg	eg	eg	fg	eg	fg	ef
44	2746	33374	<lmxll>		12	41.509	0.136	RACA31	AGTGTAGGGACAATCCCATATGGTTTATAGTTGGTTCAGTTGTTGTCTGAC	43	T	C	ll	lm	lm	ll	lm	ll	ll	ll	lm	lm	lm	lm	lm	lm	lm	lm	lm	lm	ll	ll	lm	lm	ll	ll	ll	lm	lm	ll	lm	lm	lm	lm	lm	ll	lm	ll	ll
45	2757	33467	<lmxll>		12	41.858	0.349	RACA31	CCTTCATGTGTCTAGAGAGAAAATGCAAGAAGAGAAAAAAAGGGGAAATTG	37	A	G	lm	ll	ll	lm	ll	lm	lm	lm	ll	ll	ll	ll	ll	ll	ll	ll	ll	ll	lm	lm	ll	ll	lm	lm	lm	ll	ll	lm	ll	ll	ll	ll	ll	lm	ll	lm	lm
46	2760	33500	<lmxll>		12	43.249	1.391	RACA31	TCGTGCTCTGCTTAAAACAAGAGAATGGGGGAGCAATTTCCTAGGAAACCC	42	A	G	lm	ll	ll	lm	ll	lm	lm	lm	ll	ll	ll	ll	ll	ll	ll	ll	ll	ll	lm	lm	ll	ll	lm	lm	lm	ll	ll	lm	ll	ll	ll	ll	ll	lm	ll	lm	lm
47	2770	33628	<lmxll>		12	43.764	0.515	RACA31	TTTATTGTGAAAGAAAAACGTGAGTTATTACTGTAGTAGTATTTCTTAAAC	45	T	A	ll	lm	lm	ll	lm	ll	ll	lm	lm	lm	lm	ll	lm	lm	lm	lm	lm	lm	ll	ll	lm	lm	ll	ll	ll	lm	lm	ll	lm	lm	lm	lm	lm	ll	lm	ll	ll
48	2769	33618	<lmxll>		12	45.552	1.788	RACA31	CTCCTGGTCCTTGTGTGTGGATGTGCCAGTGCCTGACTCTCAGCCTTGGAG	15	T	C	ll	lm	lm	ll	lm	ll	ll	lm	lm	lm	lm	ll	lm	lm	lm	lm	lm	lm	ll	ll	lm	lm	ll	ll	ll	lm	lm	ll	lm	lm	lm	lm	lm	ll	lm	ll	ll
49	2794	33876	<lmxll>		12	49.624	4.072	RACA31	GATTCATGAGGAACTGAGTGCTTTTTGTCTCGATCATGGGACGTGTGATCA	20	C	G	lm	ll	ll	lm	ll	lm	lm	ll	ll	ll	ll	lm	ll	ll	ll	ll	ll	ll	lm	lm	ll	lm	lm	lm	lm	ll	ll	ll	ll	ll	lm	lm	ll	lm	ll	lm	lm
50	2799	33916	<lmxll>		12	49.667	0.043	RACA31	TTATGCAAAACACCTTCCTAGTGGGAATAAGCCGTGCCAACACAACTTTAT	29	A	C	lm	ll	ll	lm	ll	lm	lm	ll	ll	ll	ll	lm	--	ll	ll	ll	ll	ll	lm	lm	ll	lm	lm	lm	lm	ll	ll	ll	ll	ll	lm	lm	ll	lm	ll	lm	lm
51	2798	33909	<lmxll>		12	50.386	0.719	RACA31	TAAAGATGATTCTTCAAAGGAAAAATTACCTGTTTTGAAAGAACATTGCAA	38	A	C	lm	ll	ll	lm	ll	lm	lm	ll	ll	ll	ll	lm	ll	ll	ll	ll	ll	ll	lm	lm	ll	lm	lm	lm	lm	ll	ll	ll	lm	ll	lm	lm	ll	lm	ll	lm	lm
52	2792	33856	<hkxhk>		12	50.559	0.173	RACA31	GAATTCTCAAGAAGACATTTATTATTTGAGTAAGTTTAACATTAATAATGA	47	A	T	hk	hk	hk	hh	kk	hh	hk	kk	hk	kk	kk	hh	kk	kk	--	kk	hk	hk	hh	hh	kk	hk	--	hk	hh	hk	kk	hk	--	kk	hh	hh	hk	hk	hk	hk	hh
53	2789	33842	<hkxhk>		12	52.845	2.286	RACA31	GGAACCCAGTCGGAACCAGCGTCCGCTGAAGCCTGGCGACGAGGCGGCAAA	26	T	C	hk	hk	hk	hh	kk	hh	hk	kk	hk	kk	kk	hh	kk	kk	hk	kk	hk	hk	hh	hh	--	hk	hk	hk	hh	--	kk	hk	hk	kk	hh	hh	hk	hk	hk	hk	hh
54	2785	33790	<hkxhk>		12	53.661	0.816	RACA31	AACATGTCATTTTGATGCATACAAACATTAACACAATAATTTGTCTGAAAT	27	T	A	hk	hk	hk	kk	hh	kk	hk	hh	hk	hh	hh	kk	hh	hh	hk	hh	hk	hk	kk	kk	hh	hk	hk	hk	kk	hk	hh	hk	hk	hh	kk	hk	hk	hk	hk	hk	kk
55	2786	33809	<nnxnp>		12	53.823	0.162	RACA31	TCGTTTTCCCTACTATATTACTGAGGTTTAAATTTTAGTGTGAAAATGTTC	35	T	G	nn	np	np	np	nn	np	nn	nn	np	nn	nn	np	nn	nn	np	nn	np	np	np	np	nn	nn	nn	nn	np	np	nn	nn	--	nn	np	np	np	nn	np	nn	np
56	2804	33967	<nnxnp>		12	54.797	0.974	RACA31	ACGTCAAGATTCAAATCAGAAGGCTTTAACATCTAATCAGCAGATCACAAC	29	T	C	nn	np	--	np	nn	np	nn	nn	np	nn	nn	np	nn	nn	--	nn	np	np	np	np	nn	nn	nn	nn	np	np	np	nn	np	nn	np	np	np	nn	np	nn	np
57	2806	33981	<hkxhk>		12	54.801	0.004	RACA31	GCAGCAGCTATGATTGCATACCCCAGGGCATAAACCAAATAGTTTAAAAAA	18	T	C	hk	hk	hk	kk	hh	kk	hk	hh	hk	hh	hh	kk	hh	hh	hk	hh	hk	hk	kk	kk	hh	hk	hk	hk	kk	hk	hk	hh	--	hh	kk	kk	hk	hk	hk	hk	kk
58	2825	34171	<lmxll>		12	54.874	0.073	RACA31	TCATTTTCAAACGTTTAGCACGCTTCAGCACCATTGAAAAAAATCCCCAAA	19	A	G	ll	lm	lm	ll	lm	ll	ll	lm	lm	lm	lm	ll	lm	lm	lm	lm	lm	lm	ll	ll	lm	ll	ll	ll	ll	lm	lm	lm	lm	lm	ll	ll	lm	ll	lm	ll	ll
59	2827	34196	<lmxll>		12	54.95	0.076	RACA31	AATCTCTTTTATGTCTACCTGCATGTTAGCATCCATCTGTGTCTCCCNNNN	39	T	C	ll	lm	--	ll	lm	ll	ll	lm	lm	lm	lm	ll	lm	lm	lm	lm	lm	lm	--	ll	lm	ll	ll	ll	ll	lm	lm	lm	--	lm	ll	ll	lm	ll	lm	ll	ll
60	2826	34185	<lmxll>		12	54.971	0.021	RACA31	CAGTACTATCGAGTTTTTATGAAAAATAAAAGTCTAAAGAACCAATGAAAC	9	C	T	ll	lm	lm	ll	lm	ll	ll	lm	lm	lm	lm	ll	lm	lm	lm	lm	lm	lm	ll	--	lm	ll	ll	ll	ll	lm	lm	lm	lm	lm	ll	ll	lm	ll	lm	ll	ll
61	2787	33810	<hkxhk>		12	55.845	0.874	RACA31	GTTAGGTGAGCTCTTCCTTCCTGTAATAGTTTTCCGTCTTGTGAATGTTAA	24	A	T	hk	hk	--	hh	kk	hh	hk	kk	hk	kk	kk	hh	kk	kk	hk	kk	hk	hk	hh	hh	kk	hk	hk	hk	hh	hk	kk	hk	hk	kk	hh	hk	hk	hk	hk	hk	hh
62	2803	33966	<nnxnp>		12	57.361	1.516	RACA31	GAACCAGGATGGGTTCAACGGTAAGACAGAAAAATGAAAAAAACTGTTCTA	45	A	G	np	nn	--	nn	np	nn	np	np	nn	np	np	nn	np	np	nn	np	nn	nn	nn	nn	np	np	np	np	nn	nn	nn	np	--	np	nn	nn	nn	np	nn	np	nn
63	2828	34235	<nnxnp>		12	59.7	2.339	RACA31	GGCAGGATGGTGTCAGGGTATCATCTTGGTGCTGTTCTTCATGAAAAATCG	33	G	T	np	nn	nn	nn	np	nn	np	np	nn	np	np	nn	np	np	nn	np	nn	nn	nn	nn	np	np	np	np	nn	nn	nn	np	nn	np	nn	nn	nn	np	nn	np	nn
64	2880	35132	<nnxnp>		12	59.74	0.04	RACA31	CCCTGAAAGACAAAAAAAAGAAAGGATTATTGTAAAAAAGATTTGTCTTTG	14	A	G	nn	np	nn	np	nn	nn	np	np	np	np	nn	nn	nn	nn	np	nn	np	nn	np	np	np	np	nn	np	nn	nn	np	nn	--	nn	nn	np	np	np	nn	np	nn
65	2717	32953	<nnxnp>		12	62.832	3.092	RACA31	TCTGCAGCCAGGAGGCTCAAGCATCAAGAATGCAGCAGAGCACATAAGCAT	31	G	A	nn	np	nn	np	nn	nn	np	np	np	np	nn	nn	nn	nn	np	nn	np	nn	np	np	np	np	nn	np	nn	nn	np	nn	np	nn	nn	np	np	np	nn	np	nn
66	2857	34838	<nnxnp>		12	64.419	1.587	RACA31	TTAGCTTCATCTTTTTCAGAGTTCATATCTAACTGTTCTTACTTTTTTCTC	33	C	T	nn	np	nn	np	nn	nn	np	np	np	np	nn	nn	nn	nn	np	nn	np	nn	np	np	np	np	nn	np	nn	nn	np	nn	np	nn	nn	np	np	np	nn	np	nn
67	2699	32807	<nnxnp>		12	64.709	0.29	RACA31	CGTGGATTGCGAATCAAATCTCATGGATCTTGTCGCAGACCTTTCTCTTTT	46	T	C	nn	np	--	np	nn	nn	np	np	np	np	nn	nn	nn	nn	np	nn	np	nn	np	np	np	np	nn	np	nn	nn	--	nn	np	nn	nn	np	np	np	nn	np	nn
68	2759	33497	<nnxnp>	2759	12	64.799	0.09	RACA31	CCCACCACGTCTGAGGAGTCTCTGTCCGCACTCAGCTGTAAAGTCTGCACC	28	C	T	nn	np	nn	np	nn	nn	np	np	np	np	nn	nn	nn	nn	np	nn	np	nn	np	np	np	np	nn	np	nn	nn	np	nn	np	nn	nn	np	np	np	nn	np	nn
69	2859	34876	<nnxnp>	2759	12	64.799	0	RACA31	GAAACCCTCACGGCAAAAAGAAAGGCCTGAGAACCTCAGAACCTCCGCTGT	46	G	A	nn	np	nn	np	nn	nn	np	np	np	np	nn	nn	nn	nn	np	nn	np	nn	np	np	np	np	nn	np	nn	nn	np	nn	np	nn	nn	np	np	np	nn	np	nn
70	2726	33114	<nnxnp>		12	64.891	0.092	RACA31	CCCTGTACTACTTGCTGCTGATTACCTGGAGCAGGTGTGTTCATACAATCA	9	A	G	nn	np	nn	np	nn	nn	np	np	np	np	nn	nn	nn	nn	np	nn	np	nn	np	np	np	np	nn	np	nn	nn	np	nn	np	nn	nn	--	np	np	nn	np	nn
71	2858	34849	<nnxnp>		12	66.13	1.239	RACA31	TCATGTTCTCCACAGAATCTTCCTCTTTATCTCAAAAGCATGACTGTTGAG	37	G	A	nn	np	--	np	nn	nn	np	np	np	np	nn	nn	nn	nn	np	nn	np	nn	np	np	np	np	nn	np	nn	nn	np	nn	--	nn	nn	np	np	np	nn	np	nn
72	2856	34826	<nnxnp>		12	66.174	0.044	RACA31	CTGGTTTGTTTGAAGGAGTTTTATATAGTCATCTGCAGCGTTTGAGTCATG	23	T	A	nn	np	nn	np	nn	nn	np	np	np	np	nn	nn	nn	nn	np	nn	np	nn	np	np	np	np	nn	np	nn	nn	np	nn	np	nn	nn	np	np	np	nn	np	nn
73	2860	34886	<nnxnp>		12	66.44	0.266	RACA31	TTTTTTCCAGAAAGTCCTGGCCAGGAGGGAAACTACTACACAACCCAAGAC	32	T	C	nn	np	nn	np	nn	nn	np	np	np	np	nn	nn	nn	nn	np	nn	np	nn	np	np	np	np	nn	np	nn	nn	np	nn	--	nn	nn	np	np	np	nn	np	nn
74	2845	34743	<nnxnp>		12	66.478	0.038	RACA31	ATAATAGACCCTTTTCACAGTGATGCCAGACAAAATGGCAGATATTATTCT	23	T	C	--	np	nn	np	nn	nn	np	np	np	np	nn	nn	nn	nn	np	nn	np	nn	np	np	np	np	nn	np	nn	nn	np	nn	np	nn	nn	np	np	np	nn	np	nn
75	2868	34960	<nnxnp>		12	66.494	0.016	RACA31	AAAAATTAATAAAAAATAAAGTTAAAAAAAAAAAAACAAAGTCGATCTTCT	24	C	A	nn	np	--	np	nn	nn	np	np	np	np	nn	nn	nn	nn	np	nn	np	nn	np	np	np	np	nn	np	nn	nn	np	nn	np	nn	nn	np	np	np	nn	np	nn
76	5471	70673	<hkxhk>		12	66.62	0.126	sc00639	AATCTAGAATCATCGGGCCAGATGTTGGGTCGTGGGTGCACTTGGTTCAGG	14	G	A	hk	hh	hk	kk	hk	hk	hk	hh	kk	hk	hh	kk	hh	hh	kk	hh	hk	hk	kk	kk	hh	hk	hk	hk	hk	hh	hk	hh	hk	hh	kk	hk	kk	hk	kk	hk	kk
77	2865	34920	<nnxnp>		12	67.292	0.672	RACA31	TCTAAACCTTCTCGCTGTCTGTGATAAAACATGGAGGTTCTGCATCACCTG	11	T	A	nn	np	nn	np	nn	nn	np	np	np	np	nn	nn	nn	nn	np	nn	np	nn	np	np	np	np	nn	np	nn	nn	np	nn	np	nn	nn	np	np	np	nn	np	nn
78	2863	34904	<nnxnp>		12	67.645	0.353	RACA31	TTTGTTTCTTGATTGTGTTTACAACAGTTGGTACTTACATGTTTTGAAGCA	7	T	C	nn	np	nn	np	nn	nn	np	np	np	np	nn	nn	nn	nn	np	nn	np	nn	np	np	np	np	nn	np	nn	nn	np	nn	--	nn	nn	np	np	np	nn	np	nn
79	2844	34741	<lmxll>		12	67.783	0.138	RACA31	AGATCCAGCAGATCCAAAACCAACCCAGCTCTGACTTCACCTCCCCAGAAG	20	C	T	ll	lm	lm	ll	lm	lm	ll	lm	ll	ll	lm	ll	lm	lm	ll	lm	lm	lm	ll	ll	lm	ll	ll	ll	lm	lm	lm	lm	lm	lm	ll	ll	ll	ll	ll	ll	ll
80	3496	42634	<nnxnp>		12	67.809	0.026	RACA13	AACCAGGCCAGATTCAATTCCAGTAGTTTTACAGTTTGCTCTGATTCCCAT	30	C	A	nn	np	nn	np	nn	nn	np	np	np	np	nn	nn	--	nn	np	nn	np	nn	np	np	np	np	nn	np	nn	nn	np	nn	np	nn	nn	np	np	np	nn	np	nn
81	2778	33681	<nnxnp>	2778	12	68.006	0.197	RACA31	GATGAAGGAATGGACCAAAACACCAGCAACAGTTTGAGAAAACCTTCTAAA	4	G	A	nn	np	--	np	nn	nn	np	np	np	np	nn	nn	nn	nn	np	nn	np	nn	np	np	np	np	nn	np	nn	nn	np	nn	np	nn	nn	np	np	np	nn	np	nn
82	2850	34786	<nnxnp>	2778	12	68.006	0	RACA31	TAAAGGGGCCTGGCTACTATTGGAGATTGCCGACTAAAGTAACACGCACCT	29	C	G	nn	np	--	np	nn	nn	np	np	np	np	nn	nn	nn	nn	np	nn	np	nn	np	np	np	np	nn	np	nn	nn	np	nn	np	nn	nn	np	np	np	nn	np	nn
83	2847	34763	<nnxnp>		12	68.368	0.362	RACA31	CGTGGGTCGAGACTCAAATCTTGTGGGTTAGGGGCAAATATTGTGGGTCGC	33	C	G	nn	np	--	np	nn	nn	np	np	np	np	nn	nn	nn	nn	np	nn	np	nn	np	np	np	np	nn	np	nn	nn	np	nn	np	nn	nn	np	np	np	nn	np	nn
84	5312	67705	<nnxnp>		12	68.562	0.194	sc00265	GGAAACATTTCTCCCTACAAATAAGCCAGGGAACCATTTTTCTCTCTTAGT	25	C	T	nn	np	nn	np	nn	nn	np	np	np	np	nn	nn	nn	nn	np	nn	np	nn	np	np	np	np	nn	np	nn	nn	np	nn	--	nn	nn	np	np	np	nn	np	nn
85	5328	67981	<nnxnp>	5328	12	68.566	0.004	sc00275	GACCTGATGTGAAGAAAAGACAGAACTCTGAACCAGGAAGAGGAACNNNNN	7	T	A	np	np	nn	nn	nn	nn	np	np	nn	np	np	nn	np	np	nn	np	nn	nn	nn	nn	np	np	np	np	nn	np	nn	np	nn	np	nn	np	nn	np	nn	np	nn
86	5329	67992	<nnxnp>	5328	12	68.566	0	sc00275	ACAAAGACTCAAAGCAGCTCCTCTTGACCTTCTCCGTTCTTCTCCAGAAAC	13	T	G	np	np	nn	nn	nn	nn	np	np	nn	np	np	nn	np	np	nn	np	nn	nn	nn	nn	np	np	np	np	nn	np	nn	np	nn	np	nn	np	nn	np	nn	np	nn
87	5313	67718	<nnxnp>		12	68.573	0.007	sc00265	TATTCAACCTGTTTAACAAAACCTTTTCACCACCTGACTCACTGCCCCCCA	46	G	C	nn	np	--	np	nn	nn	np	np	np	np	nn	nn	nn	nn	np	nn	np	nn	np	np	np	np	nn	np	nn	nn	np	nn	np	nn	nn	np	np	np	nn	np	nn
88	2852	34802	<nnxnp>		12	68.587	0.014	RACA31	ACGCTCCTCGAACGACTAACTCCATCTCATGCACCAGCCCCTTCCCTTTAT	30	G	A	nn	np	--	np	nn	nn	np	np	np	np	nn	nn	nn	nn	np	nn	np	--	np	np	np	np	nn	np	nn	nn	np	nn	np	nn	nn	np	np	np	nn	np	nn
89	5154	64789	<hkxhk>		12	68.659	0.072	sc00174	GGGACATGACTAAATCGAAGGAGCAACAAACCAGATGACCTGACAACCGAG	16	G	A	hk	hh	hk	kk	hk	hk	hk	hh	kk	hk	hh	kk	hh	hh	kk	hh	kk	hk	kk	kk	hh	hk	hk	hk	hk	hh	hk	hh	hk	hk	kk	hk	kk	hk	kk	hk	kk
90	2837	34659	<nnxnp>		12	68.835	0.176	RACA31	GCACAAATGCAGTTTATTCAGCCAGGAGCTTGATATGTGGTGAGAAATGAT	12	C	T	np	np	--	nn	nn	nn	np	np	nn	np	np	nn	np	np	nn	np	nn	nn	nn	nn	np	np	np	np	nn	np	nn	np	nn	np	nn	np	nn	np	nn	np	nn
91	2841	34710	<nnxnp>		12	68.91	0.075	RACA31	AGATTGATCTGGAGAATGGCTACTGAAGAGACCAGCTGGTTCTGTAGTTGG	16	T	C	--	np	nn	nn	nn	nn	np	np	nn	np	np	nn	np	np	nn	np	nn	nn	nn	nn	np	np	np	np	nn	np	nn	np	nn	np	nn	np	nn	np	nn	np	nn
92	5136	64649	<lmxll>		12	69.193	0.283	sc00174	TTGTTTATACAAATGGACTTATTTTCTGTAAAAGTTTGAACTTTGAAGAGA	29	A	G	ll	lm	lm	ll	lm	lm	ll	lm	ll	ll	lm	ll	lm	lm	ll	lm	ll	lm	--	ll	lm	ll	ll	ll	lm	lm	lm	lm	lm	lm	ll	ll	ll	ll	ll	ll	ll
93	5518	71649	<nnxnp>		12	69.228	0.035	sc03120	ACAATTGTAAAATCCAAACAGGCAGAGCTGGGCTCAGGAGGGCACGACAAC	43	C	A	nn	np	nn	np	nn	nn	np	np	np	np	nn	nn	nn	nn	np	nn	np	nn	np	np	np	np	nn	np	nn	nn	np	nn	--	nn	nn	np	np	np	nn	np	nn
94	5503	71386	<efxeg>		12	69.246	0.018	sc01926	GTTAGGAAATCCAGAGCCAGAGAACTCCGTTCTGATGGGATCCAGAGACGG	15	G	A	eg	fg	ee	ee	ef	ef	eg	fg	ee	eg	fg	ee	fg	fg	ee	fg	ef	ef	ee	ee	fg	eg	eg	eg	ef	fg	ef	fg	ef	fg	ee	eg	ee	eg	ee	eg	ee
95	5330	68000	<nnxnp>		12	69.334	0.088	sc00275	CACCTGGTGGGGTCTCAGTGACCCTTAGAAAGGTGAGGACAGCCCAGAACT	25	T	A	np	np	nn	nn	nn	nn	np	np	--	np	np	nn	np	np	nn	np	nn	nn	--	nn	np	np	np	np	nn	np	nn	np	nn	np	nn	np	nn	np	nn	np	nn
96	2862	34903	<nnxnp>		12	69.605	0.271	RACA31	GCGTACAAATAAGGTGTTTATTGTTTGTTAGCTCACAGTTCAAATGGTTTA	45	A	G	nn	np	nn	np	nn	nn	np	np	np	np	nn	nn	nn	nn	np	nn	np	nn	np	np	np	np	nn	np	nn	nn	np	nn	np	nn	nn	np	np	np	nn	np	nn
97	2924	35565	<lmxll>		12	69.713	0.108	RACA37	CCATGTTCAGCTCAGAATCTTCTTCTTTTTTATCTATTCTAAAAGCAGCCG	14	G	C	--	lm	lm	--	lm	lm	ll	lm	--	--	lm	ll	lm	lm	ll	lm	lm	lm	ll	ll	lm	ll	ll	ll	lm	lm	lm	lm	lm	lm	ll	ll	ll	ll	ll	ll	ll
98	2839	34671	<nnxnp>		12	69.735	0.022	RACA31	CTAAAGACTTTCGTGTTTGCAGTGTTACTCCAAGAAAACAAAGAAGTTGAC	11	C	T	nn	np	nn	np	nn	nn	np	np	np	np	nn	nn	nn	nn	--	--	np	nn	np	np	np	np	nn	np	nn	nn	np	nn	np	nn	nn	np	np	np	nn	np	nn
99	2831	34444	<nnxnp>	2831	12	69.754	0.019	RACA31	ATGCTATAAGACATATGACTACCTTATAAACTTCCCATCGTCCTACACGGG	16	A	G	nn	np	nn	np	nn	nn	np	np	np	np	nn	nn	nn	nn	np	nn	np	nn	np	np	np	np	nn	np	nn	nn	np	nn	np	nn	nn	np	np	np	nn	np	nn
100	2832	34445	<nnxnp>	2831	12	69.754	0	RACA31	CTGAACAAGCTTGATCCACTTTTATTAAATTGACTAGATTCCAATTAAGTC	28	T	A	nn	np	nn	np	nn	nn	np	np	np	np	nn	nn	nn	nn	np	nn	np	nn	np	np	np	np	nn	np	nn	nn	np	nn	np	nn	nn	np	np	np	nn	np	nn
101	5327	67978	<hkxhk>		12	69.775	0.021	sc00275	GAAATCTGGTTGTTACCCATGATTTGACATTTGTTCCTTTGCAGACCAAAC	18	A	T	hk	--	hk	hh	hk	hk	hk	kk	hh	hk	kk	hh	kk	kk	hh	kk	hh	hk	hh	hh	kk	hk	hk	hk	hk	kk	hk	kk	hk	kk	hh	hk	hh	hk	hh	hk	hh
102	2853	34803	<nnxnp>	2853	12	69.874	0.099	RACA31	GTTTTCTTAACCCTTGTGCTACAGTAGGCATGTTTACGTTAAAAGTGGGGC	7	C	T	nn	np	nn	np	nn	nn	np	np	np	np	nn	nn	nn	nn	np	nn	np	nn	np	np	np	np	nn	np	nn	nn	np	nn	np	nn	nn	np	np	np	nn	np	nn
103	2855	34825	<nnxnp>	2853	12	69.874	0	RACA31	CACTGTCACAAGCAGGATCCATCTTTTGTGGTGATCACTGTTCCAGCATAT	12	C	T	nn	np	nn	np	nn	nn	np	np	np	np	nn	nn	nn	nn	np	nn	np	nn	np	np	np	np	nn	np	nn	nn	np	nn	np	nn	nn	np	np	np	nn	np	nn
104	2864	34918	<nnxnp>	2853	12	69.874	0	RACA31	ATAAACCGGGACATTATTTTTACAATGAGTCCAAATCCTTTTGCTTCATAT	10	A	G	nn	np	nn	np	nn	nn	np	np	np	np	nn	nn	nn	nn	np	nn	np	nn	np	np	np	np	nn	np	nn	nn	np	nn	np	nn	nn	np	np	np	nn	np	nn
105	2867	34944	<nnxnp>	2853	12	69.874	0	RACA31	GAGCAACCTGTGAGGGGACGAGAAAACATGCAGATGCTCAGGAACCGCAGA	18	T	C	nn	np	nn	np	nn	nn	np	np	np	np	nn	nn	nn	nn	np	nn	np	nn	np	np	np	np	nn	np	nn	nn	np	nn	np	nn	nn	np	np	np	nn	np	nn
106	2830	34400	<nnxnp>		12	69.909	0.035	RACA31	CATCGCGATTCAAGATTTTGGTACATTTAGTAAAACTGAACACATTCTCTA	10	C	G	--	np	nn	np	nn	nn	np	np	np	np	nn	nn	nn	nn	np	nn	np	nn	np	np	np	np	nn	np	nn	nn	np	nn	np	nn	nn	np	np	np	nn	np	nn
107	2849	34784	<nnxnp>		12	69.91	0.001	RACA31	ACACCTCCTGTTGCATCGATTAAATTTATATTTTGATTACTTAAAGTATTG	37	T	A	nn	np	nn	np	nn	nn	np	np	np	np	nn	nn	nn	nn	np	nn	np	nn	np	np	np	np	nn	np	nn	--	np	nn	np	nn	nn	np	np	np	nn	np	nn
108	2833	34628	<lmxll>		12	70.727	0.817	RACA31	TCGCTCTGCCTGCTCTTCTTCTCATTCACAAATGTCTCACTTTTTTCCGCT	47	C	A	ll	lm	--	ll	lm	lm	ll	lm	ll	ll	lm	ll	lm	lm	ll	lm	lm	lm	ll	ll	lm	ll	ll	ll	lm	lm	lm	lm	lm	--	ll	ll	ll	lm	ll	ll	ll
109	2843	34729	<lmxll>		12	71.606	0.879	RACA31	CTCCGATTTGTGCGAACATAGTTCTTGATTTGTAACTTATAAAATACATTA	20	G	A	ll	lm	lm	ll	lm	lm	ll	lm	ll	ll	lm	ll	lm	lm	ll	lm	lm	lm	ll	ll	lm	ll	ll	ll	lm	lm	lm	lm	lm	lm	ll	ll	ll	ll	ll	ll	ll
110	2875	35059	<nnxnp>		12	71.897	0.291	RACA31	GGAAAAGGCATTTACTTTTCGGAAGTGTTTTTATATTTTTTTGTTTATTTT	5	A	G	nn	np	nn	np	nn	nn	np	np	np	np	nn	nn	nn	nn	np	nn	np	nn	np	np	np	np	nn	np	nn	nn	np	nn	np	nn	nn	np	np	np	nn	np	nn
111	5426	69505	<lmxll>		12	72.172	0.275	sc00334	TTATTTTTCTGCAACCGAATTGTGATCTTCCTCAGAATGATATTTCCTTGT	16	G	T	ll	lm	lm	ll	lm	lm	ll	lm	ll	ll	lm	ll	lm	lm	ll	lm	lm	lm	ll	ll	lm	ll	ll	--	lm	lm	lm	lm	--	lm	ll	ll	ll	ll	ll	ll	ll
112	2838	34662	<lmxll>	2838	12	72.405	0.233	RACA31	TTCAGGACTTGATTGATCTCATCCTGAGATGTCCAGCTTCCGACACACTGA	28	A	C	ll	lm	lm	ll	lm	lm	ll	lm	ll	ll	lm	ll	lm	lm	ll	lm	lm	lm	ll	ll	lm	ll	ll	ll	lm	lm	lm	lm	--	lm	ll	ll	ll	ll	ll	ll	ll
113	5429	69510	<lmxll>	2838	12	72.405	0	sc00334	GAACCTCCTGCTGTGAGGCCCCAACCATGAACGCTCCTCATCAGAACCGTG	22	A	G	ll	lm	lm	ll	lm	lm	ll	lm	ll	ll	lm	ll	lm	lm	ll	lm	lm	lm	ll	ll	lm	ll	ll	ll	lm	lm	lm	lm	--	lm	ll	ll	ll	ll	ll	ll	ll
114	5140	64711	<hkxhk>		12	72.426	0.021	sc00174	TTAGGCTGTAGAAGTCTTTACTGACCTTTGACCCACAGGTGTGAGCGCACC	16	T	G	hk	--	--	kk	hk	hk	hk	hh	kk	hk	hh	kk	hh	hh	kk	hh	kk	hk	kk	kk	hh	hk	hk	hk	hk	hh	hk	hh	--	hh	kk	hk	kk	hk	kk	hk	kk
115	5144	64730	<hkxhk>		12	72.683	0.257	sc00174	TCAAGCTTTTAAACAGAATCTCTTCATATGTTTGAGATGGAGCGGGACATG	26	T	C	hk	hh	hk	kk	hk	hk	hk	hh	kk	hk	hh	kk	hh	hh	kk	hh	kk	hk	kk	kk	hh	hk	hk	hk	hk	hh	hk	hh	hk	hh	kk	hk	kk	hk	kk	hk	kk
116	5141	64712	<lmxll>		12	72.749	0.066	sc00174	GTGAGTGTCTCAGGACTCTTGAAAGGTGCATGAAACACACCAGGAACCGAC	5	T	C	ll	lm	lm	ll	lm	lm	ll	lm	ll	ll	lm	ll	lm	lm	ll	lm	ll	lm	ll	ll	lm	ll	ll	ll	lm	lm	lm	lm	lm	lm	ll	ll	ll	ll	ll	ll	ll
117	5148	64767	<hkxhk>		12	77.583	4.834	sc00174	GAACTCCAACATCATCCTGGAACTTTACCGCTTCGTAAAGTCAATAGAAAT	28	C	A	hk	kk	hk	hh	hk	hk	hk	kk	hh	hk	kk	hh	kk	kk	hh	kk	hh	hk	hh	hk	kk	hk	hk	hk	hk	kk	hk	kk	--	kk	hk	hk	hh	hk	hh	hk	hh
118	5146	64756	<efxeg>		12	80.081	2.498	sc00174	GAATGTGGAATCTCTGAACTCAGGTCAGAGCGCCGCTGGTTCATCCTCGCA	12	T	C	eg	ef	ef	ee	ef	ef	eg	fg	ee	eg	fg	ee	fg	--	ee	fg	ee	ef	ee	ef	fg	eg	eg	eg	ef	fg	ef	fg	ef	fg	ef	eg	ee	eg	ee	eg	ee
1	4955	61644	<nnxnp>		13	0		RACA33	CTTCAGGAAGCTACCTGGGAGAACAGGTGAGCCAAGGGTTCAAAGTTCAAA	18	G	A	np	np	--	nn	nn	np	np	nn	np	nn	np	nn	nn	nn	np	--	nn	np	np	np	--	nn	np	nn	nn	nn	np	np	np	nn	np	nn	nn	nn	nn	np	np
2	4956	61660	<nnxnp>		13	2.626	2.626	RACA33	ATATCAATCATTTTAACAACTTTTCCTTTTGCAGTTGATAAAAATCTTTTT	14	A	T	np	np	nn	nn	nn	np	np	nn	np	nn	np	nn	nn	nn	np	nn	nn	np	np	np	nn	nn	np	nn	nn	nn	np	np	np	nn	nn	nn	nn	nn	nn	np	np
3	4957	61673	<nnxnp>		13	3.093	0.467	RACA33	AACATTTCAACCATAGGGTGCATGCTATTTCACATGAAACATATGGCTGTT	42	G	A	np	np	nn	nn	nn	np	np	nn	np	nn	np	nn	nn	nn	np	nn	nn	np	np	np	nn	nn	np	nn	nn	nn	np	np	np	nn	nn	nn	nn	nn	nn	np	np
4	4935	61403	<nnxnp>		13	4.288	1.195	RACA33	CCAAGCCCTGCCAGCTGCTGTTTAGTTCAGTCAGACGTCTTCACATTCTGA	43	A	C	np	np	nn	nn	nn	np	np	nn	np	nn	np	nn	nn	nn	nn	nn	nn	np	np	np	nn	nn	np	nn	nn	nn	np	np	np	nn	np	nn	nn	nn	nn	np	np
5	4934	61397	<nnxnp>		13	5.324	1.036	RACA33	AGTCTCTCTTAGGAAGATTCTAAAGGAGAAAAAGGCTGAGGGTCAGTGGTC	31	A	C	np	--	nn	nn	nn	--	np	nn	--	nn	np	nn	nn	nn	nn	nn	nn	np	np	np	nn	nn	np	nn	nn	nn	np	np	np	nn	np	nn	nn	nn	nn	np	np
6	4938	61411	<nnxnp>		13	6.035	0.711	RACA33	CAGTGACCCGGTGGATGCAGGATCAAACTGCCCTCTGGGAATGATATTAAA	36	G	A	np	np	nn	nn	nn	np	np	nn	np	nn	np	nn	nn	nn	nn	nn	nn	np	np	np	nn	nn	np	nn	nn	nn	np	np	np	nn	np	nn	nn	nn	nn	np	np
7	4958	61698	<nnxnp>		13	7.173	1.138	RACA33	ATGTTGAGTTTTTGCTCATTGTCTTCTTTTACTGCATTTTTTTCAACATTT	4	T	A	np	np	--	nn	nn	np	np	nn	np	nn	np	nn	nn	nn	np	nn	nn	np	np	np	nn	nn	np	nn	nn	nn	np	np	--	nn	nn	nn	nn	nn	nn	np	np
8	4923	61262	<nnxnp>		13	8.569	1.396	RACA33	GTGGTTTTCGGTCTCTGACACTGGACGCATTTTTGAGACTTTAAACAAGAC	22	T	G	np	np	nn	nn	nn	np	np	nn	np	nn	np	nn	nn	nn	nn	nn	nn	np	np	np	nn	--	np	nn	nn	nn	np	np	--	nn	np	nn	nn	nn	nn	np	np
9	4921	61236	<nnxnp>		13	8.579	0.01	RACA33	CAATCATTTCTATATTTAAGTCAATCAAATGTAATGTTCAGGGTAAAGTTA	36	T	G	np	np	nn	nn	nn	np	np	nn	np	nn	np	--	nn	nn	--	nn	nn	np	np	np	nn	nn	np	nn	nn	nn	np	np	--	nn	np	nn	nn	nn	nn	np	np
10	4980	62093	<lmxll>		13	9.443	0.864	RACA33	AAAAATAAGTGTTTCTGCATCTCAGAAAAAACAAAAAACTCATCAGCTAAA	31	C	A	lm	ll	--	lm	lm	ll	ll	ll	ll	lm	ll	lm	lm	lm	lm	lm	ll	lm	ll	lm	lm	lm	lm	lm	lm	ll	lm	ll	lm	lm	ll	ll	--	lm	ll	ll	lm
11	5007	62568	<lmxll>		13	10.481	1.038	RACA33	GCCCACAATGCTAACGTCCACCTCTCCAACAGCGCCTTAAAGATGACAGTT	33	G	A	lm	lm	--	ll	ll	lm	lm	lm	lm	ll	lm	ll	ll	ll	ll	ll	lm	ll	lm	ll	ll	ll	lm	ll	ll	lm	ll	lm	--	ll	lm	lm	lm	ll	lm	lm	ll
12	4952	61530	<nnxnp>		13	11.016	0.535	RACA33	ATGACAGGTTACCAGCAGCTTCTCAGTTTATATTAGGATGATTCAGTATAG	19	T	C	np	np	nn	nn	nn	np	np	nn	np	nn	np	nn	nn	nn	np	nn	nn	np	np	np	nn	nn	np	nn	nn	nn	np	np	np	nn	np	nn	nn	nn	nn	np	np
13	4951	61518	<nnxnp>		13	11.121	0.105	RACA33	GAAACATATTCTAAAAACACAAAATAACTATTCCTCTCAAATATTGCTCAC	46	T	C	np	np	nn	nn	nn	np	np	nn	np	nn	np	nn	nn	nn	np	nn	nn	np	np	np	--	nn	np	nn	nn	nn	np	np	np	nn	np	nn	nn	nn	nn	np	np
14	4953	61540	<nnxnp>		13	11.145	0.024	RACA33	GAAATGCTTTCCTAAGGTTTCTCCCTATCCCTACATTTAAACCTACAAGCA	3	T	A	np	np	nn	nn	nn	np	np	nn	np	nn	np	nn	nn	nn	np	nn	nn	np	np	np	nn	nn	np	nn	nn	nn	np	np	np	nn	np	nn	nn	nn	nn	np	np
15	4950	61513	<nnxnp>		13	11.451	0.306	RACA33	NAATTCAACCACTATGAGTCAGAAATAAGTACCTGGTACTAAACAGAGCAG	28	G	A	np	np	nn	nn	nn	np	np	nn	np	nn	np	--	nn	nn	np	nn	nn	np	np	np	nn	nn	np	nn	nn	nn	np	np	np	nn	np	nn	nn	nn	nn	np	np
16	4954	61555	<nnxnp>		13	12.18	0.729	RACA33	GGGGTCGAGATCAGAGTGATCACCACAGCAACCAAGAAATCCATACTTCAA	6	G	A	np	np	nn	nn	nn	np	np	nn	np	nn	np	nn	nn	nn	np	nn	nn	np	np	np	nn	nn	np	nn	nn	nn	np	np	np	nn	np	nn	nn	nn	nn	np	np
17	4905	61085	<hkxhk>		13	12.911	0.731	RACA33	GTCATCATCGATCAGAAACTGTCTACTTTTTCTGAGACTCATCAACTATCA	46	T	C	hk	hh	hk	--	kk	hh	hh	hk	hh	kk	hk	kk	kk	kk	kk	--	hk	hk	hh	hh	hk	kk	hk	kk	kk	hk	hk	--	hk	kk	hk	hk	hk	kk	hk	hh	hk
18	4918	61205	<hkxhk>		13	13.771	0.86	RACA33	ACCAGAGTTAATACAGAGGCTGTTCAAGATAAAAGCTTTGTTCCTGGCCAT	30	A	G	hk	kk	--	hh	hh	kk	kk	hk	kk	hh	hk	hh	hh	hh	hh	hh	hk	hk	--	kk	hk	--	hk	hh	hh	hk	hk	kk	--	hh	hk	hk	hk	hh	hk	kk	hk
19	4910	61151	<nnxnp>		13	14.061	0.29	RACA33	GGAGTCAGCGTGCAGGCTGGGATAGTGGAGAGAGTGAGACCAGGGAGTGGA	28	A	G	np	np	--	nn	nn	np	np	nn	np	nn	np	nn	nn	nn	nn	nn	nn	np	np	np	nn	nn	np	nn	nn	nn	np	np	np	--	np	nn	nn	nn	nn	np	np
20	4926	61279	<efxeg>		13	14.847	0.786	RACA33	GAATTTAATCTATATTTGAAATTAGCCAGCTCTACTCGATTTCCATCTGTA	23	A	G	eg	fg	ef	ee	ee	fg	fg	ef	fg	ee	eg	ee	ee	ee	ee	--	ef	eg	fg	fg	ef	ee	eg	ee	ee	ef	eg	--	ee	ee	eg	ef	ef	ee	ef	fg	eg
21	4927	61291	<hkxhk>		13	15.811	0.964	RACA33	TCCTTAACCATCAAATGCTTTGCTTAAGGAATACTTCAAACACTTGCTTAT	34	T	A	hk	kk	hk	hh	hh	kk	kk	hk	kk	hh	hk	hh	hh	hh	hh	hh	hk	hk	kk	kk	hk	hh	hk	hh	hh	hk	hk	kk	hk	hh	hk	hk	hk	hh	hk	kk	hk
22	4924	61268	<hkxhk>		13	16.149	0.338	RACA33	GCAAAGACACGGTCAAACTCTTGATGAAAGAGAAGAACTGATTTGCTGTGA	18	T	C	hk	kk	hk	hh	hh	kk	kk	hk	kk	hh	hk	hh	hh	hh	hh	hh	hk	hk	kk	kk	hk	hh	hk	hh	hh	hk	hk	kk	hk	hh	hk	hk	hk	hh	hk	kk	hk
23	4893	60971	<lmxll>		13	17.326	1.177	RACA33	GCAGAAGAGCATCTTGAACACGCAACACCTCCAGGCAGATGGGCTACAGAG	14	T	A	ll	lm	--	ll	ll	lm	lm	lm	lm	ll	ll	ll	ll	ll	ll	ll	lm	ll	lm	lm	lm	ll	ll	ll	ll	lm	ll	lm	ll	ll	ll	lm	lm	ll	lm	lm	ll
24	4878	60801	<lmxll>		13	17.757	0.431	RACA33	CTAAAGGTTTTGTGTTTTCCCACCATTTTCACTCCCTGTCTTGCTATTTTA	30	A	G	ll	lm	--	ll	ll	lm	lm	lm	lm	ll	ll	ll	ll	ll	ll	ll	lm	ll	lm	lm	lm	ll	ll	ll	ll	lm	ll	lm	ll	ll	ll	lm	lm	ll	lm	lm	ll
25	4939	61415	<lmxll>		13	18.078	0.321	RACA33	CAAGTCCTTGGCTGCAAGCTCAACTCATGTCTCAAGTCCTTGGCCACAAGC	18	C	T	ll	lm	lm	ll	ll	lm	lm	lm	lm	ll	ll	ll	ll	ll	ll	ll	lm	ll	lm	lm	lm	ll	ll	ll	ll	lm	ll	lm	ll	ll	ll	lm	lm	ll	lm	lm	ll
26	4883	60845	<nnxnp>		13	18.242	0.164	RACA33	GCAGCTGTCAGAGCAGCAAGCAGTTCATCACTTGTCTCTAATGAGGAGGGC	11	G	A	np	np	nn	nn	nn	np	np	nn	np	nn	np	nn	nn	nn	nn	nn	nn	np	np	np	np	nn	np	nn	nn	nn	np	np	np	nn	np	nn	nn	nn	nn	np	np
27	4993	62281	<lmxll>		13	18.268	0.026	RACA33	GACATTTTACTTTTTTTTCAGCACCAATTTTTTTTTTCAATTTGTTTTATT	27	T	A	ll	ll	ll	lm	lm	lm	lm	lm	ll	ll	ll	lm	lm	lm	ll	ll	lm	ll	ll	ll	lm	lm	ll	lm	ll	lm	ll	ll	ll	lm	--	lm	lm	lm	lm	ll	ll
28	4888	60879	<lmxll>		13	19.355	1.087	RACA33	AAATAAAAATTAATGAATTAAAACTGGTCCTACAATTCTTACTAAGGTATT	5	A	G	--	lm	lm	ll	ll	lm	lm	lm	lm	ll	ll	ll	ll	ll	ll	ll	lm	ll	lm	lm	--	ll	ll	ll	ll	lm	ll	lm	ll	ll	ll	lm	lm	ll	lm	lm	ll
29	4844	60510	<hkxhk>		13	19.51	0.155	RACA33	GATTGTGATCACAGATTTATAAATCTGGCAAGCTGCACATGCTGTATCTTT	44	T	C	hk	kk	--	hh	hh	kk	kk	hk	kk	hh	hh	hh	hk	hh	hh	hh	hk	hk	kk	kk	kk	hh	hk	hh	hh	hk	hk	kk	hk	hh	hk	hk	hk	hh	hk	kk	hk
30	4852	60558	<hkxhk>		13	20.261	0.751	RACA33	CTAGTAAACTGACTACCTTTAACATACATAGATAAATAAAAGTTTTATTTT	30	G	A	hk	hh	hk	kk	kk	hh	hh	hk	hh	kk	kk	kk	hk	kk	kk	kk	hk	hk	hh	hh	hh	kk	hk	kk	kk	hk	hk	hh	hk	kk	hk	hk	hk	kk	hk	hh	hk
31	4845	60515	<hkxhk>		13	20.648	0.387	RACA33	CTAGTAGATCATTTTCCCACAGATAATCGTGTCGTGGTCCCATCATGCCTT	19	C	T	hk	hh	hk	kk	kk	hh	hh	hk	hh	kk	kk	kk	hk	kk	kk	kk	hk	hk	hh	hh	hh	kk	hk	kk	kk	hk	hk	hh	hk	--	hk	hk	hk	kk	hk	hh	hk
32	4889	60905	<lmxll>		13	21.281	0.633	RACA33	GCTGCCAGCAGCTCCAGAGGGAAAACTGCTGCAGCTAACTCCCCTTCTCCC	47	T	C	--	lm	lm	ll	ll	lm	lm	lm	lm	ll	ll	ll	ll	ll	ll	ll	lm	ll	lm	lm	lm	ll	ll	ll	ll	lm	ll	lm	ll	ll	ll	lm	lm	ll	lm	lm	ll
33	4846	60521	<nnxnp>		13	22.271	0.99	RACA33	TCTTACTGCATTGATTTTCTCATCATTTTTTGTTTGATCAAAATCCAGAGA	7	T	G	np	np	--	nn	nn	np	np	nn	np	nn	nn	nn	np	nn	nn	nn	nn	np	np	np	np	nn	np	nn	nn	nn	np	np	np	nn	np	nn	nn	nn	nn	np	np
34	4850	60546	<nnxnp>		13	22.426	0.155	RACA33	ACTGAAACATAATTGACTGTTTACTACAAGAAGGCCTATTAACGTGATATA	39	T	C	np	np	nn	nn	nn	np	np	nn	np	nn	nn	nn	np	nn	nn	nn	nn	np	np	np	np	nn	np	nn	nn	nn	np	np	np	nn	np	nn	nn	nn	nn	np	np
35	4856	60608	<hkxhk>		13	23.576	1.15	RACA33	ACAATCAGCTCCATCCTGATACATTCACTTGTAGACGACTAGATTAGTTTT	45	A	C	hk	kk	hk	hh	hh	kk	kk	hk	kk	hh	hh	hh	hk	hh	hh	hh	hk	hk	kk	kk	kk	--	hk	hh	hh	hk	hk	kk	hk	hh	hk	hk	hk	hh	hk	kk	hk
36	4853	60602	<hkxhk>		13	23.656	0.08	RACA33	GTGCTAAGGGCCATCAACTGCACTCACTAACTCACACTAATCTTAGCCAGC	5	A	T	hk	kk	--	hh	hh	kk	--	hk	kk	hh	hh	hh	hk	hh	hh	hh	hk	hk	kk	kk	kk	hh	hk	hh	hh	hk	hk	kk	hk	hh	hk	hk	hk	hh	hk	kk	hk
37	4863	60655	<efxeg>		13	23.743	0.087	RACA33	TTAGTTTGTAGAATTTGGCCTCTAAGATTGAGTTTTTGTACTACTGTACTG	15	T	A	eg	fg	--	ee	ee	fg	fg	ef	fg	ee	ee	ee	eg	ee	ee	ee	ef	eg	fg	fg	fg	ee	eg	ee	ee	ef	eg	fg	--	ee	eg	ef	ef	ee	ef	fg	eg
38	4864	60662	<nnxnp>		13	23.746	0.003	RACA33	TTGGTCTTGGTTATGGCTGAGAGGTTGCAGCCTGACTGTTTAAGGGTGTGG	4	T	C	np	np	nn	nn	--	np	np	nn	np	nn	nn	nn	np	nn	nn	nn	nn	np	np	np	np	nn	np	nn	nn	nn	np	np	np	nn	np	nn	nn	nn	nn	np	np
39	4861	60652	<hkxhk>		13	23.9	0.154	RACA33	NAATTCAACCGATGGACAGATGTGCTCTACTGACTTTAAATCTTCCCTATA	32	A	G	hk	kk	hk	hh	hh	kk	--	hk	kk	hh	hh	hh	hk	hh	--	hh	hk	hk	kk	kk	kk	hh	hk	hh	hh	hk	hk	kk	hk	hh	hk	hk	hk	hh	hk	kk	hk
40	4937	61409	<lmxll>		13	24.268	0.368	RACA33	GTAAGGAGAAGAAGAGCAGTGACTCCACCCTCTGTGCGCACGCCCTCCCTG	35	G	A	ll	lm	lm	ll	ll	lm	lm	lm	lm	ll	ll	ll	ll	ll	ll	ll	lm	ll	lm	lm	lm	ll	ll	ll	ll	lm	ll	lm	ll	ll	ll	lm	lm	ll	lm	lm	ll
41	4915	61183	<lmxll>		13	24.713	0.445	RACA33	ACACGTCTCAGCCTCACCGTCACACATGGCGTGTGTTCAAACACTTATCCC	17	C	T	ll	lm	lm	ll	ll	lm	lm	lm	lm	ll	ll	ll	ll	ll	ll	ll	lm	ll	lm	lm	lm	ll	ll	ll	ll	lm	ll	lm	ll	ll	ll	lm	lm	ll	lm	lm	ll
42	4942	61426	<lmxll>		13	25.546	0.833	RACA33	TTGGTTTTATTCTTTAATACTGGACTTATTTTTCTATGAAAGTTTGAACTT	40	A	G	ll	lm	lm	--	ll	lm	lm	lm	lm	ll	ll	ll	ll	ll	ll	ll	lm	ll	lm	lm	lm	ll	ll	ll	ll	lm	ll	lm	ll	ll	ll	lm	lm	ll	lm	lm	ll
43	4932	61370	<lmxll>		13	25.564	0.018	RACA33	ATTTCCATATTCCTACCACTGATTGGCTTCAGATGTTTAAAAACTACCCCT	32	A	G	ll	lm	lm	ll	ll	lm	lm	lm	lm	ll	ll	ll	ll	ll	ll	ll	lm	ll	lm	lm	lm	ll	ll	ll	ll	lm	ll	lm	ll	ll	ll	lm	lm	ll	lm	lm	ll
44	4871	60717	<hkxhk>		13	26.16	0.596	RACA33	TACATACTTTCCCACTTTACACTTTAAATATGTCACATTTTGTCCCAGAAA	10	C	T	hk	kk	hk	hh	hh	kk	kk	hk	kk	hh	hk	hh	hk	hh	hh	hh	hk	hk	kk	kk	kk	hh	hk	hh	hh	hk	hk	kk	--	hh	hk	hk	hk	hh	hk	kk	hk
45	4865	60674	<hkxhk>		13	26.435	0.275	RACA33	NAATTCAGAGTGTGAGCTTTTCCGAGTGAGAGATTAGACCAAGACAGGCGC	12	T	C	hk	hh	hk	kk	kk	hh	hh	hk	hh	kk	kk	kk	hk	kk	kk	kk	hk	hk	hh	hh	hh	kk	hk	kk	kk	hk	hk	hh	hk	kk	hk	hk	hk	kk	hk	hh	hk
46	4859	60643	<nnxnp>		13	26.529	0.094	RACA33	TTGCTTTCTTAATGGGTCCATTCCTCTTCTTTTAGTGTATCGAACAAATTA	7	C	T	np	np	nn	nn	nn	np	np	nn	np	nn	nn	nn	np	nn	nn	nn	nn	np	np	np	np	nn	np	nn	nn	nn	np	np	np	nn	np	nn	nn	nn	nn	np	np
47	4875	60756	<lmxll>		13	27.086	0.557	RACA33	TGTTGGTTGAGTTCAAATAGAAAAAGGGAAAGAAAGCTTTTATTTGCTACA	12	T	C	ll	lm	lm	ll	ll	lm	lm	lm	lm	ll	ll	ll	ll	ll	ll	ll	lm	ll	lm	lm	lm	ll	ll	ll	ll	lm	ll	lm	ll	ll	ll	lm	lm	ll	lm	lm	ll
48	4909	61125	<lmxll>		13	27.916	0.83	RACA33	AATCAAAACCCCCCGCTGTGTTTGTGTGTAAGACAGGGGGGATTTTTGTAA	5	A	G	ll	lm	lm	ll	ll	lm	lm	lm	lm	ll	ll	ll	ll	ll	ll	ll	lm	ll	lm	lm	lm	ll	ll	ll	ll	lm	ll	lm	ll	ll	ll	lm	lm	ll	lm	lm	ll
49	4892	60947	<lmxll>		13	28.364	0.448	RACA33	GTTTTCAGGAGTTTCTTATTGCCTCCCATGCTCAAAAGTTCACCTTAAGTA	40	C	T	ll	lm	lm	ll	ll	lm	lm	lm	lm	ll	ll	ll	ll	ll	ll	ll	lm	ll	lm	lm	lm	ll	ll	ll	ll	lm	ll	lm	ll	ll	ll	lm	lm	ll	lm	lm	ll
50	4880	60816	<lmxll>		13	28.407	0.043	RACA33	ACCTCTCCTAAAGCATGCTGGTGTTTCTTCATTACTCCTTGTGACATCAAT	32	T	C	ll	lm	lm	ll	ll	lm	lm	lm	lm	ll	ll	ll	ll	ll	ll	ll	lm	ll	lm	lm	lm	ll	ll	ll	ll	lm	ll	lm	--	ll	ll	lm	lm	ll	lm	lm	ll
51	4890	60914	<lmxll>		13	28.411	0.004	RACA33	CCTTCTCTTGTGCTGTAAAGTTGCATGAAGGTGTGTTTGTGTGGGAGTTGG	18	A	G	ll	lm	lm	ll	ll	lm	lm	lm	lm	ll	ll	ll	ll	ll	ll	ll	lm	ll	lm	lm	lm	ll	ll	ll	ll	lm	ll	lm	ll	ll	ll	lm	lm	ll	lm	lm	ll
52	4894	60978	<lmxll>		13	28.426	0.015	RACA33	CAACTAGTCTGCTAACCTTCTTTTGAAATGAACTCCAACTTTCTAAAAGAC	24	G	C	ll	lm	--	ll	ll	lm	lm	lm	lm	ll	ll	ll	ll	ll	ll	ll	lm	ll	lm	lm	lm	ll	ll	ll	ll	lm	ll	lm	ll	ll	ll	lm	lm	ll	lm	lm	ll
53	4877	60787	<lmxll>		13	28.456	0.03	RACA33	TTCTCATTTGGAAAAAAAACAACTTTCTACTGAACACCTGTAGCGTAGTGA	44	G	A	ll	lm	lm	ll	ll	lm	lm	lm	lm	ll	ll	ll	ll	ll	ll	ll	lm	--	lm	lm	lm	ll	ll	ll	ll	lm	ll	lm	ll	ll	ll	lm	lm	ll	lm	lm	ll
54	4874	60755	<hkxhk>		13	28.654	0.198	RACA33	GAAGTCAACAGGATGCACCCCCCCCCCACACACACCTAAGATGTGGGATCA	25	C	A	hk	hh	hk	kk	kk	hh	hh	hk	hh	kk	hk	--	hk	kk	kk	kk	hk	hk	hh	hh	hh	kk	hk	kk	kk	hk	hk	hh	hk	kk	hk	hk	hk	kk	hk	hh	hk
55	5108	64279	<nnxnp>		13	29.848	1.194	sc00159	TTTTAAGATGAGTTCTTAATCATCTTTATCTGTTATTTTATTGGACTTTAC	32	A	T	np	np	--	nn	nn	nn	np	np	np	np	np	nn	nn	np	np	--	nn	np	nn	np	nn	nn	np	nn	--	nn	np	np	np	nn	nn	nn	nn	nn	nn	np	np
56	4895	60998	<lmxll>		13	30.028	0.18	RACA33	TATCAGCTGAACTTTGCCATCTTCTATTAGTCATTAATGACTCTATTATAA	5	G	A	ll	lm	--	ll	ll	lm	lm	lm	lm	ll	ll	ll	ll	ll	ll	ll	lm	ll	lm	lm	lm	ll	ll	ll	ll	lm	ll	lm	ll	ll	ll	lm	lm	ll	lm	lm	ll
57	4838	60273	<nnxnp>		13	31.454	1.426	RACA33	GAAACTTGGCTATAAACAGCTAACGAACAAAAATTGCAAGAACAACACAGC	25	T	A	np	np	nn	nn	nn	np	np	nn	np	nn	nn	nn	np	nn	nn	nn	np	np	np	np	np	nn	np	nn	nn	nn	np	nn	nn	nn	np	np	nn	nn	np	np	np
58	4904	61084	<lmxll>		13	31.802	0.348	RACA33	TTCACAAACTTAAGAGAAAATGAAAATCAAAGATTGAAGAAGTTGGAATTC	23	A	G	ll	lm	--	ll	ll	lm	lm	lm	lm	ll	ll	ll	ll	ll	ll	ll	lm	ll	lm	lm	lm	ll	ll	ll	ll	--	ll	lm	--	ll	ll	lm	lm	ll	lm	lm	ll
59	5005	62564	<lmxll>		13	34.438	2.636	RACA33	CAGCAACTTCTTTAAAAATTTACATCATTAATGAAGCAAACAGTTTGTCAG	22	C	T	lm	ll	ll	lm	lm	ll	ll	ll	ll	lm	ll	lm	lm	lm	lm	lm	ll	lm	ll	lm	lm	lm	ll	lm	lm	ll	lm	ll	lm	lm	ll	ll	ll	lm	ll	ll	lm
60	5322	67818	<efxeg>		13	37.282	2.844	sc00268	GCATGGCAGAATGGACCAAAATAGCAGCTACTGTGAATCCAAACTTGGAGG	11	C	T	eg	fg	--	ee	ee	ef	ef	ef	fg	eg	fg	ee	ee	ee	eg	eg	ef	eg	fg	eg	ee	ee	fg	ee	ee	--	eg	fg	--	ee	ef	ef	ef	ee	ef	fg	eg
61	5323	67831	<hkxhk>		13	37.705	0.423	sc00268	CCTGCAGAGACCTTCAGCTGTGCGCTCCTCGTATGAAGAACAGATTCTATC	40	C	G	hk	hh	hh	kk	kk	hk	hk	hk	hh	hk	hh	kk	kk	kk	hk	hk	hk	hk	hh	hk	kk	kk	hh	kk	kk	hk	hk	hh	hk	kk	hk	hk	hk	kk	hk	hh	hk
62	4824	59977	<nnxnp>		13	37.815	0.11	RACA33	AAAACCTGCTTGAAAGTTTCATGGGGCATTTAAAAAGTACAGGGTCTGTAA	10	A	T	np	np	nn	--	nn	np	np	nn	nn	nn	nn	nn	np	nn	nn	nn	np	np	np	np	np	nn	np	nn	nn	nn	np	nn	nn	nn	np	np	nn	nn	np	np	np
63	5382	68895	<hkxhk>		13	38.266	0.451	sc00303	TCACCGTCTTGTCGCTGGAGAGGAAAAAAGACGGGATGTTAACAAAGAAAG	45	A	G	hk	hh	hh	kk	kk	hk	hk	hk	hh	hk	hh	kk	kk	kk	hk	hk	hk	hk	hh	hk	kk	kk	hh	kk	kk	hk	hk	hh	hk	kk	hk	hk	hk	kk	hk	hh	hk
64	5276	66828	<lmxll>		13	38.676	0.41	sc00241	ATTTGAACACCCTGTGATTTTGCAAGTTCTCCCATCTAGAAATCATGGAGG	16	A	G	ll	lm	--	ll	ll	lm	lm	lm	lm	ll	lm	ll	ll	ll	ll	ll	lm	ll	lm	ll	ll	ll	lm	ll	ll	lm	ll	--	ll	ll	lm	lm	lm	ll	lm	--	ll
65	4964	61845	<lmxll>		13	38.988	0.312	RACA33	TCAGTAAAAATAAAGATATTTTAAAGTGAACCGTATACTTTCTTAAGAATT	40	T	C	ll	lm	--	ll	ll	lm	lm	lm	lm	ll	lm	ll	ll	ll	ll	ll	lm	ll	lm	ll	ll	ll	lm	--	--	lm	ll	--	--	ll	lm	lm	lm	ll	lm	lm	ll
66	4822	59967	<nnxnp>		13	39.299	0.311	RACA33	CCTTTGACTGCTCTCACATATTATAACCCAATTATAGTCTGTTCTGCATAC	19	A	G	nn	np	nn	nn	nn	np	np	nn	nn	nn	nn	nn	np	nn	nn	nn	np	np	np	np	np	nn	np	nn	nn	nn	np	nn	nn	nn	np	np	nn	nn	np	np	np
67	4996	62306	<nnxnp>		13	39.969	0.67	RACA33	CCAGGTTTGGCCCAATGATGCAAAGATGAGTAAAAGTGCTTCATTTGTTTT	19	G	A	np	np	np	nn	nn	nn	nn	np	np	np	np	nn	nn	nn	np	np	nn	np	np	np	nn	nn	np	nn	nn	nn	np	np	np	nn	nn	nn	nn	nn	nn	np	np
68	4804	59780	<nnxnp>		13	40.616	0.647	RACA33	CAAAGGAAAATAAGGGGGAAATAAATGAATCTTAAGAAAGAAAACTTGTCT	14	G	A	nn	np	nn	nn	np	np	np	nn	nn	nn	nn	nn	np	nn	nn	nn	np	np	np	np	np	nn	np	nn	nn	nn	np	nn	nn	nn	np	np	nn	nn	np	np	np
69	5111	64293	<nnxnp>		13	41.323	0.707	sc00159	ACCCGGTGGGATCATAGGAATATGAATCGATTAGGTCAACTAATCCTCGCG	3	C	T	np	np	np	nn	nn	nn	nn	np	np	np	np	nn	nn	nn	np	np	nn	np	np	np	nn	nn	np	nn	nn	nn	np	np	--	nn	nn	nn	nn	nn	nn	np	np
70	5006	62566	<nnxnp>		13	41.652	0.329	RACA33	TCTGATGCTGGTTTAAGGATAAAACAACTTTAAAGACGAAGAGGACCAATG	42	G	T	np	np	np	nn	nn	nn	nn	np	np	np	np	nn	nn	nn	np	np	nn	np	np	np	nn	nn	np	nn	nn	nn	np	np	np	nn	nn	nn	nn	nn	nn	np	np
71	5454	70426	<nnxnp>		13	41.754	0.102	sc00472	AGATCCGTTTGGGTGGGTGTTCTTTCCTACTGTAAAAACTTCCAGATGTGT	5	C	A	np	np	np	nn	nn	nn	nn	np	np	np	np	nn	nn	nn	np	np	nn	np	np	np	--	nn	np	nn	nn	nn	np	np	np	nn	nn	nn	nn	nn	nn	np	np
72	4807	59800	<nnxnp>		13	42.676	0.922	RACA33	GTTTTCCTATTTTTCTCATGATTATTTTACGTTTTATGTAGGCTACATTAT	42	C	T	nn	np	--	nn	np	np	np	nn	nn	nn	nn	nn	np	nn	nn	nn	np	np	np	np	np	nn	np	nn	nn	nn	np	nn	--	nn	np	np	nn	nn	np	np	np
73	4814	59847	<nnxnp>		13	43.718	1.042	RACA33	ATTAATACAGACTAAATCTGTACAATACATATATTTCAAGAATGTGTTCAG	23	A	G	nn	np	nn	nn	np	np	np	nn	nn	nn	nn	nn	np	nn	nn	nn	np	np	np	np	np	nn	np	nn	nn	nn	np	nn	--	nn	np	np	nn	nn	np	np	np
74	4809	59817	<nnxnp>		13	43.751	0.033	RACA33	TCATTTCTTATGATTCTCACATTTAGCAAGGAAAAAAAATTACAGCGTGAC	14	T	A	nn	np	nn	nn	np	np	np	nn	nn	nn	nn	nn	np	nn	nn	nn	np	np	np	np	np	nn	np	nn	nn	nn	np	nn	--	nn	np	np	nn	nn	np	np	np
75	5040	63210	<hkxhk>		13	46.208	2.457	RACA33	TTGCTGGACGGCGCCCGGCAGCTCGTCGCCTGAACAGCACGTTCTGAAAAA	11	C	T	hk	hh	hk	hk	hh	hk	hh	kk	kk	hk	hk	hh	hh	kk	hk	hk	hk	hk	hk	hk	hk	hk	hh	hk	kk	hk	hh	kk	hk	hk	hh	hk	kk	hk	hk	hk	hk
76	5039	63194	<hkxhk>		13	46.965	0.757	RACA33	GTTGTTACTTTGACAGATTCGACTGGAAAACGGTTGTTGCACATGCAAGTT	19	C	T	hh	hk	hh	hh	hk	kk	hk	hk	hk	hh	hh	hk	hk	hk	hh	hh	kk	kk	kk	kk	kk	hh	hk	hh	hk	kk	hk	hk	hh	hh	hk	kk	hk	hh	kk	kk	kk
77	4820	59933	<nnxnp>		13	47.071	0.106	RACA33	ACAGTTTNAAAACGTACAGTATTTACAAAACANCCTTAATGCAGAAAAAGG	10	G	A	nn	np	nn	nn	nn	np	np	nn	nn	nn	nn	nn	np	nn	nn	nn	np	np	np	np	np	nn	np	nn	nn	nn	np	nn	--	nn	np	np	nn	nn	np	np	np
78	4819	59908	<nnxnp>		13	48.359	1.288	RACA33	GTGTCCCACTTCAAAAACTGGTCCAGCTTTGGTAATAATAAGGCCTGTTTT	35	T	A	nn	np	nn	nn	np	np	np	nn	nn	nn	nn	nn	np	nn	nn	nn	np	np	np	np	np	nn	np	nn	nn	nn	np	nn	nn	nn	np	np	nn	nn	np	np	np
79	4803	59767	<nnxnp>		13	48.967	0.608	RACA33	TTTAATTTGACTTATTTACGCTGTTTCAAACAAATTTACTTGTTTATTTAT	6	T	C	nn	np	nn	nn	np	np	np	nn	nn	nn	nn	nn	np	--	nn	nn	np	np	np	np	np	nn	np	nn	nn	nn	np	nn	nn	nn	np	np	nn	nn	np	np	np
80	4808	59813	<nnxnp>	4808	13	50.749	1.782	RACA33	ATTTGTCTACAAGTGGAGGCATCAGAATGAAGCAGAATATATTTTCTACAT	14	G	T	nn	np	nn	nn	np	np	np	nn	nn	nn	nn	nn	np	nn	nn	nn	np	np	np	np	np	nn	np	nn	nn	nn	np	nn	nn	nn	np	np	nn	nn	np	np	np
81	4812	59825	<nnxnp>	4808	13	50.749	0	RACA33	AACAAACAGTAGCTAATTCCTGCATTCTTCTTCTTGTGGTGAATTTGTGGA	15	T	A	nn	np	nn	nn	np	np	np	nn	nn	nn	nn	nn	np	nn	nn	nn	np	np	np	np	np	nn	np	nn	nn	nn	np	nn	nn	nn	np	np	nn	nn	np	np	np
82	4806	59787	<nnxnp>		13	51.434	0.685	RACA33	GCAAATTTAATAAATGCTGTAGTTCCTCAAATGACCACTGGAGGCTGGTTT	16	C	T	nn	np	nn	nn	np	np	np	nn	nn	nn	nn	nn	np	nn	nn	nn	np	np	np	np	np	nn	np	nn	nn	nn	np	nn	--	nn	np	np	nn	nn	np	np	np
83	4810	59821	<nnxnp>	4810	13	52.09	0.656	RACA33	ATCAAAACTAATGATTAGCGCTAAAAATTATTTTATTTGGCACTTAAAGCA	28	T	G	nn	np	nn	nn	np	np	np	nn	nn	nn	nn	nn	np	nn	nn	nn	np	np	np	np	np	nn	np	nn	nn	nn	np	nn	nn	nn	np	np	nn	nn	np	np	np
84	4813	59837	<nnxnp>	4810	13	52.09	0	RACA33	GATGACTATTTCTCATTTTCTCTTACATTAAAGTCACAGATTTTACCCATC	23	A	T	nn	np	nn	nn	np	np	np	nn	nn	nn	nn	nn	np	nn	nn	nn	np	np	np	np	np	nn	np	nn	nn	nn	np	nn	nn	nn	np	np	nn	nn	np	np	np
85	5026	63032	<hkxhk>		13	59.706	7.616	RACA33	NAATTCACCTCTTGAGTTGTGAGTGTGACCGATGAGCAACCTCCCTGTTGC	23	T	C	kk	hk	--	kk	hh	hh	hk	hk	hk	kk	kk	hk	hk	hk	kk	hk	hk	hh	hh	hh	hh	hk	kk	kk	hh	--	kk	hk	hk	kk	kk	hk	hk	hk	hh	hh	hh
86	4843	60496	<lmxll>		13	64.106	4.4	RACA33	AGTAGTACAGGGGTCACCTGCAGCTCCGGGGCTGCATGAGGTTCTTTAACC	4	G	A	lm	lm	lm	lm	ll	ll	lm	--	ll	lm	lm	lm	lm	ll	lm	ll	ll	ll	ll	--	ll	--	lm	lm	ll	ll	lm	ll	ll	lm	lm	lm	lm	lm	--	ll	ll
87	5023	62985	<efxeg>		13	67.248	3.142	RACA33	GTCTGTTGCCGGACCTCCTCGTACGAGACAAACCGCACAGGTCCATCCAGT	10	G	C	ee	eg	ee	ee	fg	fg	eg	ef	ef	--	ee	eg	eg	ef	ee	ef	ef	fg	fg	fg	fg	ef	ee	ee	fg	fg	ee	ef	ef	ee	eg	eg	eg	eg	fg	fg	fg
88	4959	61707	<nnxnp>		13	68.922	1.674	RACA33	TTATGTGACCTCACACCTTATGTACCTGAATGGTGCCTTTCTCCACCTGAT	16	T	C	np	--	np	np	nn	nn	nn	np	np	np	np	nn	nn	np	np	np	np	nn	nn	nn	nn	np	np	np	nn	nn	np	np	np	np	nn	nn	nn	nn	nn	nn	nn
89	4855	60604	<nnxnp>		13	68.924	0.002	RACA33	TCTGCAGCGGGTTCTGGGTGAGCTCCCGCGGGCCGGGACCCTCGAACAAAA	27	G	T	nn	np	nn	nn	np	np	np	nn	nn	nn	nn	np	np	nn	nn	--	nn	np	np	np	np	nn	nn	nn	np	np	nn	nn	--	nn	np	np	np	np	np	np	np
90	4887	60869	<nnxnp>		13	68.926	0.002	RACA33	TTCTTCATGCATCTCCGAGATCGTCCCAGAGCGTCCACGAAATCCACCCTG	32	A	G	nn	np	nn	nn	np	np	np	nn	nn	nn	nn	np	np	nn	nn	nn	nn	np	np	np	np	nn	nn	nn	np	np	nn	nn	nn	nn	np	np	np	np	np	np	np
91	4872	60732	<nnxnp>		13	69.382	0.456	RACA33	TACATACAGAGAGTGGACAAAGTGATGCAATGAAGCAAAGAGTGAGCTGTG	6	T	C	nn	np	nn	nn	np	np	np	nn	nn	nn	nn	np	np	nn	nn	nn	nn	np	np	np	np	nn	nn	nn	np	np	nn	nn	nn	nn	np	np	np	np	np	np	np
92	5016	62833	<lmxll>		13	71.935	2.553	RACA33	GAGGTCTGGAACCGTCTCATTCAATGCAGTTTTCTATTGTTTTAATTATTT	46	T	G	lm	lm	lm	lm	ll	ll	lm	ll	ll	lm	lm	lm	lm	ll	lm	ll	ll	ll	ll	ll	ll	ll	lm	ll	ll	ll	lm	ll	ll	lm	lm	lm	lm	lm	ll	ll	ll
93	4925	61272	<nnxnp>		13	73.222	1.287	RACA33	GATGCTTCAAAGTGAACCAGTTCCTGTTTTACCTGGAAGCTGCTGCACACC	4	C	T	np	nn	np	np	nn	nn	nn	np	np	np	np	nn	nn	np	np	np	np	nn	nn	nn	nn	np	np	np	nn	nn	np	np	np	np	nn	nn	--	nn	nn	nn	nn
94	4802	59755	<hkxhk>		13	73.32	0.098	RACA33	GTGCTGGTGTTTGACGTTTTCTATGATGAACTGCTTTGTTTTGCTGCTGAT	22	A	C	hh	hk	hh	hh	kk	kk	hk	hk	hk	hh	hh	hk	hk	hk	hh	hk	hk	kk	kk	kk	kk	hk	hh	hh	kk	kk	hh	hk	--	hh	hk	hk	hk	hk	kk	kk	kk
95	4916	61187	<lmxll>		13	75.459	2.139	RACA33	GGTCCATTGATCATGCTAACGGCTGAGAAGTTTTGTGTTTAAGTGTCATGT	25	A	G	lm	lm	lm	lm	ll	ll	lm	ll	ll	lm	lm	lm	lm	ll	lm	ll	ll	ll	ll	ll	ll	ll	lm	ll	ll	ll	lm	--	ll	lm	lm	lm	lm	lm	ll	--	--
96	4815	59858	<lmxll>		13	77.244	1.785	RACA33	GCGATGCTCAGGTGCTTCATGAAGTAATACATGCGGGACTGACTGTGCTTG	41	A	G	lm	lm	lm	lm	ll	ll	lm	ll	ll	lm	lm	lm	lm	ll	lm	ll	ll	ll	ll	ll	ll	ll	lm	ll	ll	ll	lm	ll	ll	lm	lm	lm	lm	lm	ll	ll	ll
97	4805	59785	<lmxll>		13	77.322	0.078	RACA33	NAATTCTTAATAGATAGTTCTTTTTTGTCTTTACATTTTATATAGAATAGA	33	C	T	lm	lm	lm	lm	ll	ll	lm	ll	ll	lm	lm	lm	lm	ll	lm	ll	ll	ll	ll	ll	ll	ll	lm	ll	ll	ll	lm	ll	--	lm	lm	lm	lm	lm	ll	ll	ll
98	4854	60603	<lmxll>		13	80.118	2.796	RACA33	GCTGTTTCTCAGCTGATATAAGACATCCGCCCCCCTCAGCCCCGCACATCA	43	G	T	ll	ll	--	ll	lm	lm	ll	lm	lm	ll	ll	ll	ll	lm	ll	lm	lm	lm	lm	lm	lm	lm	ll	lm	lm	lm	ll	lm	--	ll	ll	ll	ll	ll	lm	lm	lm
99	4944	61451	<lmxll>		13	81.399	1.281	RACA33	GCCACAGCTGTGCATCTCATTTTGAAAACGCTTTGTGCTTTTGTTTTTCCA	21	T	C	ll	ll	ll	ll	lm	lm	ll	lm	lm	ll	ll	ll	ll	lm	ll	lm	lm	lm	lm	lm	lm	lm	ll	lm	lm	lm	ll	lm	lm	ll	ll	ll	ll	ll	lm	lm	lm
100	4946	61466	<lmxll>		13	82.73	1.331	RACA33	TAATTTATTGAGCGGAAGTTCTGTCTCATATTTTGAACGGATAAAGAAGCT	3	T	G	ll	ll	ll	ll	lm	lm	ll	lm	lm	ll	ll	ll	ll	lm	ll	lm	lm	lm	lm	lm	lm	lm	ll	lm	lm	lm	ll	lm	lm	ll	ll	ll	ll	ll	lm	lm	lm
101	4945	61452	<lmxll>		13	82.782	0.052	RACA33	TAAAAATATGTTTATTTGTAGTTTTCAGGACAAATAATAACATTATTTTCA	44	A	G	ll	ll	--	ll	lm	lm	ll	lm	lm	ll	ll	ll	ll	lm	ll	lm	lm	lm	lm	lm	lm	lm	ll	lm	lm	lm	ll	lm	lm	ll	ll	ll	ll	ll	lm	lm	lm
102	4908	61121	<lmxll>		13	84.132	1.35	RACA33	GCTATAGGGAGCTAGCAAAATTTGCTGTAGCGAGCTATAGAGTTCTGCTGT	30	C	T	ll	ll	ll	ll	lm	lm	ll	lm	lm	ll	ll	ll	ll	lm	ll	lm	lm	lm	lm	lm	lm	lm	ll	lm	lm	lm	ll	lm	ll	ll	ll	ll	ll	ll	lm	lm	lm
1	4566	56492	<nnxnp>		14	0		RACA17	CCTGCTGGGCACGTTCGCGGTGAGGAAGCTGCAGAAAAAGGGCCACTCTGG	35	G	A	np	nn	nn	nn	nn	nn	np	nn	nn	nn	nn	np	nn	nn	nn	nn	nn	np	np	np	np	nn	np	np	nn	np	np	nn	np	np	np	nn	np	nn	nn	nn	nn
2	4561	56439	<nnxnp>		14	2.661	2.661	RACA17	AATCAGCTTGTGCTCCTCCCTCCACTCTTATGTTCCTCTCTGTTCATCTAC	12	G	C	nn	np	--	np	np	np	nn	nn	np	np	np	nn	np	np	np	np	np	nn	nn	nn	nn	np	nn	nn	np	nn	nn	np	nn	nn	nn	np	nn	np	np	np	np
3	4560	56438	<nnxnp>		14	2.771	0.11	RACA17	GCAACTTCTAAGTTGTAGGAGGGAAGAATGAGGCCAGACAGCATAGGACGG	14	G	T	nn	np	np	np	np	np	nn	nn	np	np	np	nn	np	np	np	np	np	nn	nn	nn	nn	np	nn	nn	np	nn	nn	np	nn	nn	nn	np	nn	np	np	np	np
4	4541	56320	<nnxnp>		14	4.085	1.314	RACA17	ACGCCCTGCAGCACTTACAGCAAACAAGACCTCAGTTGTTATTGAATCGTC	37	A	G	nn	np	np	np	nn	np	nn	nn	np	np	np	nn	np	np	np	np	np	nn	--	nn	--	np	nn	nn	np	nn	nn	np	nn	--	--	np	nn	np	np	np	np
5	4542	56327	<nnxnp>		14	4.682	0.597	RACA17	TTAGCCGCTGCTACTCCACATCGAGAGGAACCAGTGAAGTGGCTCGGGGAT	45	C	G	nn	np	np	np	nn	np	nn	nn	np	np	np	--	np	np	np	np	np	nn	nn	nn	nn	np	nn	nn	np	nn	nn	np	nn	nn	nn	np	nn	np	np	np	np
6	4555	56415	<nnxnp>		14	6.609	1.927	RACA17	CTGCCACATGATGACTAGAGACTGTGAGTCATGCAATGAACATAAAATCCC	15	T	G	--	np	np	np	nn	np	nn	nn	np	np	np	nn	np	np	np	np	np	nn	nn	nn	nn	np	nn	nn	np	nn	nn	np	nn	nn	nn	np	nn	np	np	np	np
7	4557	56425	<nnxnp>		14	6.65	0.041	RACA17	GCTCCTCTCCATTCTGATGAATCCACCTGCAGACAAATAGATCCATAAACC	46	A	G	nn	np	np	np	nn	np	nn	nn	np	np	np	nn	np	np	np	np	np	nn	nn	nn	nn	np	nn	nn	np	nn	nn	np	nn	nn	nn	np	nn	np	np	np	np
8	4431	55131	<lmxll>		14	8.05	1.4	RACA17	ACAAATTGGGTCAATTTTTTCCATCTTTTATTGAACAGGTCACTTTTGAAT	47	G	T	ll	ll	--	lm	lm	ll	ll	lm	lm	ll	lm	lm	ll	ll	ll	ll	ll	lm	ll	ll	lm	ll	ll	ll	lm	ll	ll	lm	lm	ll	ll	ll	ll	lm	lm	ll	ll
9	4545	56346	<nnxnp>		14	8.3	0.25	RACA17	CCCTCTGAATAAACATGCAGCCTTTTCCAAACATCAGCAGCAGCTTAATTA	46	T	A	nn	np	np	np	nn	np	nn	nn	np	np	np	nn	np	np	np	np	np	nn	nn	nn	nn	np	nn	nn	np	nn	nn	np	nn	nn	nn	np	nn	np	np	np	np
10	4551	56391	<lmxll>		14	8.327	0.027	RACA17	AAACCGTCTAAAAGACTCTAAATACAGGTTTGAATGTCTGAAGTTGTTGTG	47	T	C	ll	ll	ll	lm	lm	ll	ll	lm	lm	ll	lm	lm	ll	ll	ll	ll	ll	lm	ll	ll	lm	ll	ll	ll	lm	ll	ll	lm	lm	ll	ll	ll	ll	lm	lm	ll	ll
11	4263	52840	<lmxll>		14	8.725	0.398	RACA18	GTGTGTAATTTACTTTAATTTGTTGTGATTTTAATTTGTATGTATAAATTG	12	C	T	ll	ll	ll	lm	lm	ll	ll	lm	lm	ll	lm	lm	ll	ll	ll	--	ll	lm	ll	ll	lm	ll	--	ll	lm	--	ll	lm	lm	--	ll	ll	ll	lm	lm	ll	ll
12	5193	65341	<lmxll>		14	9.185	0.46	sc00197	TGACCACGGTCTGCCAGTTATGCCTCGTTTCCACTGAGCAGTGCTGACCAG	35	G	T	ll	ll	ll	lm	lm	ll	ll	lm	lm	ll	lm	lm	ll	ll	ll	ll	ll	lm	ll	ll	lm	ll	ll	ll	lm	ll	ll	lm	lm	ll	ll	ll	ll	lm	lm	ll	ll
13	4548	56370	<nnxnp>		14	9.907	0.722	RACA17	ACAGCAGTCCTTTAAAAATGACAGATTGTTGCTGAATCGGGATGTTCCACT	38	T	G	nn	np	np	np	nn	np	nn	nn	np	np	np	nn	np	np	np	np	nn	nn	nn	nn	nn	np	nn	nn	np	nn	nn	np	nn	nn	nn	np	nn	np	np	np	np
14	4547	56368	<nnxnp>		14	9.919	0.012	RACA17	GCTGACCTCCCATTGAATTGACCAATCTGCCGATCTATTTCTGAATGATGG	34	C	T	nn	np	np	np	nn	np	nn	nn	np	np	np	nn	np	np	np	np	nn	nn	nn	nn	nn	np	nn	nn	np	nn	nn	np	nn	nn	nn	np	nn	np	np	np	np
15	5194	65352	<lmxll>		14	10.353	0.434	sc00197	CTTCAGTCAAGAGAAAGATGGAAGCGCCGCGGTCTGCAAAATCTTTTCAGG	45	T	G	ll	ll	--	lm	lm	ll	ll	lm	lm	ll	lm	lm	ll	ll	ll	ll	ll	lm	ll	ll	lm	ll	ll	ll	lm	ll	ll	lm	lm	ll	ll	ll	ll	lm	lm	ll	ll
16	5084	63908	<lmxll>		14	11.722	1.369	sc00129	AAACTTCGTTCAATCAACACTCGCGCATATTTTCTTTAGAAACTGCCCTTG	6	C	T	ll	ll	ll	lm	lm	ll	ll	lm	lm	ll	lm	lm	ll	ll	ll	ll	ll	lm	ll	ll	lm	ll	ll	ll	lm	ll	ll	lm	lm	ll	ll	ll	ll	lm	lm	ll	ll
17	4580	56589	<efxeg>		14	12.354	0.632	RACA17	NAATTCCTGTCAGGTTTTAGAAAAATGTATAAAAATTTACTTTTCAGATTC	21	A	T	--	fg	--	ee	ee	fg	ee	ee	eg	fg	eg	ee	fg	fg	fg	fg	ef	ee	ef	ef	ee	fg	ef	ee	eg	ee	ef	eg	ee	ee	ef	--	ee	eg	eg	fg	fg
18	4562	56470	<lmxll>		14	14.694	2.34	RACA17	TTTTTGGGAACAGATTTTGTGTTACATTTGTTTGGAGGTCATAATTCTTTA	29	G	A	lm	lm	lm	ll	ll	lm	lm	ll	ll	lm	ll	ll	lm	lm	lm	lm	lm	ll	lm	lm	ll	lm	lm	lm	ll	lm	lm	ll	ll	lm	lm	lm	lm	ll	ll	lm	lm
19	4577	56566	<nnxnp>		14	14.8	0.106	RACA17	NAATTCCTTTTATGATGGAAAGCTCCCATCTGTTTGCTCGGTTTAATCCAG	39	A	G	--	np	np	np	nn	np	nn	nn	np	np	np	nn	np	np	np	np	--	nn	nn	nn	nn	np	nn	nn	np	nn	nn	np	nn	nn	nn	np	nn	np	np	np	np
20	4572	56522	<nnxnp>		14	15.183	0.383	RACA17	ATAACTGATGGACAGCACTGAAATTTAAATCAATATGCATTCTAATAAAAG	21	A	C	nn	np	np	np	nn	np	nn	nn	np	np	np	nn	np	np	np	np	nn	nn	nn	nn	nn	np	nn	nn	np	nn	nn	np	nn	nn	nn	np	nn	np	np	np	np
21	4583	56615	<nnxnp>		14	15.69	0.507	RACA17	CACCATATGGTGGTCCATCATATATTGCAATAGATGAAATCTGCAAAGTAG	5	A	T	nn	np	--	np	nn	--	nn	nn	np	np	np	nn	np	np	np	np	--	nn	nn	nn	nn	np	--	nn	np	nn	nn	np	nn	nn	nn	np	nn	np	np	--	np
22	4581	56590	<nnxnp>		14	15.73	0.04	RACA17	AGCAGCCCAGACTCAAGGAGGGAAAACAACCCCACAAGGCTCTACAATCGA	29	C	A	nn	np	np	np	nn	np	nn	nn	np	np	np	nn	np	np	np	np	nn	nn	nn	nn	nn	np	nn	nn	np	nn	nn	np	nn	nn	nn	np	nn	np	np	np	np
23	4552	56393	<lmxll>		14	17.314	1.584	RACA17	CCCCTCGTGGAACAAATAATCTTAAGAATGCTGAAGAATAGTCTGGTAGTA	32	G	A	lm	lm	lm	ll	ll	lm	lm	ll	--	lm	ll	ll	lm	lm	lm	lm	lm	ll	lm	lm	ll	lm	lm	lm	ll	lm	lm	ll	ll	lm	lm	lm	lm	ll	ll	lm	lm
24	4559	56437	<lmxll>		14	17.471	0.157	RACA17	ACACACAAACAAAGCAGCTCCTTCTGACATTCTCCATCACCAAGTCTCCTC	14	C	T	lm	lm	lm	ll	ll	lm	lm	ll	ll	lm	ll	ll	lm	lm	lm	lm	lm	ll	lm	lm	ll	lm	lm	lm	ll	lm	lm	ll	ll	lm	lm	lm	lm	ll	ll	lm	lm
25	4554	56410	<lmxll>		14	17.489	0.018	RACA17	TCACATCGTGATTTTCTTCAATAATCGTACAAATCAAAACTAGACTAGGGG	9	G	C	lm	lm	--	ll	ll	lm	lm	ll	ll	--	ll	ll	lm	lm	lm	lm	lm	ll	lm	lm	ll	lm	lm	lm	ll	lm	lm	ll	ll	lm	lm	lm	lm	ll	ll	lm	lm
26	4550	56386	<lmxll>		14	17.588	0.099	RACA17	CATTCATTTCTCAGGTTAAAATCATTAATGGCATTCCTTTGCTCCTCAAAG	36	C	T	lm	lm	--	ll	ll	lm	lm	ll	ll	lm	ll	ll	lm	lm	lm	lm	lm	ll	lm	lm	ll	lm	lm	lm	ll	lm	lm	ll	--	lm	lm	lm	lm	ll	ll	lm	lm
27	4574	56532	<efxeg>		14	17.607	0.019	RACA17	TAATATCCATGAATAAATGGCACCAATAAGACACTGTGGCATGGTGACATC	24	A	G	ef	fg	fg	eg	ee	fg	ee	ee	eg	fg	eg	ee	fg	fg	fg	fg	ef	ee	ef	ef	ee	fg	ef	ef	eg	ef	ef	eg	ee	ef	ef	fg	ef	eg	eg	fg	fg
28	4584	56616	<nnxnp>		14	18.591	0.984	RACA17	TCAAAGTTGTGTTGGCCAAAATAAACAAAGGTTTTAGTTCATTAATTAANN	42	T	G	nn	np	np	np	nn	np	nn	nn	np	np	np	nn	np	np	np	np	nn	nn	nn	nn	nn	np	nn	nn	np	nn	nn	np	nn	nn	nn	np	nn	np	np	np	np
29	4585	56623	<lmxll>		14	19.298	0.707	RACA17	ACAGGGAGTCAGGCAATTAACATATATAAGAGCAGAGTACAAGTGCAGGTG	31	G	C	lm	lm	lm	ll	ll	lm	ll	ll	ll	lm	ll	ll	lm	lm	lm	lm	lm	ll	lm	lm	ll	lm	lm	lm	ll	lm	lm	ll	ll	lm	lm	lm	lm	ll	ll	lm	lm
30	4546	56354	<lmxll>		14	19.429	0.131	RACA17	GGGCTGATGTCTGATCTGGTGGCGGGAAATGGTGATGAAATATAGGCCTCT	45	G	C	lm	lm	--	ll	ll	lm	ll	ll	ll	lm	ll	ll	lm	lm	lm	lm	lm	ll	lm	lm	ll	lm	lm	lm	ll	lm	lm	ll	ll	lm	lm	lm	lm	ll	ll	lm	lm
31	4575	56541	<lmxll>		14	19.529	0.1	RACA17	ACATGCTCTGGTTGTGATTCATATTTCATATCAGCATAGTATGTTTATAAT	16	A	T	lm	lm	--	ll	ll	lm	ll	ll	ll	lm	ll	ll	lm	lm	lm	lm	lm	ll	lm	lm	ll	lm	lm	lm	ll	lm	lm	ll	--	lm	lm	lm	lm	ll	ll	lm	lm
32	4573	56523	<lmxll>		14	19.532	0.003	RACA17	GTTTCTTTGTGCAAAAAACAGTTAAAAATATTAATATTGTCCTATGTAATG	30	T	A	lm	lm	--	ll	ll	lm	ll	ll	ll	lm	ll	ll	lm	lm	lm	lm	lm	ll	lm	lm	ll	lm	lm	lm	ll	lm	lm	ll	--	lm	lm	lm	lm	ll	ll	lm	lm
33	4571	56512	<lmxll>		14	19.568	0.036	RACA17	TCTTAAGAGTTGTGATGTTTTGGGGTTGCTGCTAAAAAACGTCCAAGTCCC	39	C	T	lm	lm	lm	ll	ll	lm	ll	ll	ll	lm	ll	ll	lm	lm	lm	lm	lm	ll	lm	lm	ll	lm	lm	lm	ll	lm	lm	ll	ll	lm	lm	lm	lm	ll	ll	lm	lm
34	4578	56568	<hkxhk>		14	19.936	0.368	RACA17	TTCACCTGGACAAAACTGGAAGGAACCAATCAACAATAAGCAAGAAGTTTG	7	G	T	hk	hh	hh	hk	kk	hh	kk	kk	hk	hh	hk	kk	hh	hh	hh	--	hk	kk	hk	hk	kk	hh	hk	hk	hk	hk	hk	hk	--	hk	hk	hh	hk	hk	hk	hh	hh
35	2896	35332	<lmxll>		14	20.816	0.88	RACA31	CTTCAGTCATTGGCCGGCAGTTACGGGGGTGGGTCAAAAAAAAAAAAAAAA	15	G	A	lm	lm	--	ll	ll	lm	ll	ll	ll	--	ll	ll	lm	lm	lm	lm	lm	ll	lm	lm	ll	lm	lm	lm	ll	lm	lm	ll	ll	lm	--	lm	lm	ll	lm	lm	lm
36	4599	56773	<nnxnp>		14	21.083	0.267	RACA17	AACCTTACTTGCACCTCTTTGAGGAGGATGAGCATCAGTGGGCCTCTTCAT	13	T	C	np	nn	nn	nn	np	nn	np	np	nn	nn	nn	np	nn	nn	nn	np	np	np	np	np	np	nn	nn	np	nn	np	np	nn	np	--	np	nn	np	np	nn	nn	nn
37	4587	56649	<lmxll>		14	21.975	0.892	RACA17	CACATACCAAACGAAGAATAGGCTAAAATCAAGAGAAGTGGGGGAAATAAA	12	G	A	lm	ll	lm	ll	ll	lm	ll	ll	ll	lm	ll	ll	lm	lm	lm	lm	lm	ll	lm	lm	ll	lm	lm	lm	ll	lm	lm	ll	ll	lm	lm	lm	lm	ll	ll	lm	lm
38	4590	56682	<lmxll>		14	22.514	0.539	RACA17	ATACTAACAACCCCTCCCCTCTGGGACCTGACCTTCTGCCAGGAGATTGCT	16	C	T	lm	ll	lm	ll	ll	lm	ll	ll	ll	lm	ll	ll	lm	lm	lm	lm	lm	ll	lm	lm	ll	lm	lm	lm	ll	lm	lm	ll	lm	lm	lm	lm	lm	ll	ll	lm	lm
39	4607	56863	<nnxnp>		14	24.818	2.304	RACA17	TAAACCTAAAAAAACAGGTTTATCTTCTGAAATTGGTTTGGGTTAGTTACC	35	G	C	nn	np	--	np	nn	np	nn	nn	np	np	np	nn	np	np	np	nn	nn	nn	nn	nn	nn	np	np	nn	np	nn	nn	np	nn	nn	nn	np	nn	nn	np	np	np
40	4600	56803	<nnxnp>		14	25.378	0.56	RACA17	ACGAGCAGAGGGCTACTCCTGCAAGTTCAAAGCGTCTCCTGTCAAAAATTA	33	G	C	nn	np	np	np	nn	np	nn	nn	np	np	np	nn	np	np	np	nn	nn	nn	nn	nn	nn	np	np	nn	np	nn	nn	np	--	nn	nn	np	nn	nn	np	np	np
41	4591	56683	<efxeg>		14	26.469	1.091	RACA17	AAAACAGACATCACTAAACTTATTTTAATTCAGAAGTAATGAGATTGAAAT	5	A	G	--	ee	ef	ee	eg	ef	eg	eg	ee	ef	ee	eg	ef	ef	ef	fg	fg	eg	fg	fg	eg	ef	fg	fg	ee	fg	fg	ee	fg	fg	fg	ef	fg	ee	ee	ef	ef
42	4604	56840	<hkxhk>		14	27.872	1.403	RACA17	TTGCAGCATTTGACATTTAAACCTGCTTCCTCACACTAACAAGTGGTACTT	17	T	C	hk	hk	hh	hk	kk	hh	kk	kk	hk	hh	hk	kk	hh	hh	hh	hk	hk	kk	hk	hk	hk	hh	hh	hk	hk	hk	hk	hh	hk	hk	hk	hh	hk	kk	hk	hh	hh
43	4610	56874	<hkxhk>		14	27.872	0	RACA17	ACAAAGACAGTGGAGCTCTCTCTGATTGTCTCTGTGCTTTTCAATCAACAT	14	G	A	hk	hk	kk	hk	hh	kk	hh	hh	hk	kk	hk	hh	kk	kk	kk	hk	hk	hh	hk	hk	hk	kk	kk	hk	hk	hk	hk	kk	hk	hk	hk	kk	hk	hh	hk	kk	kk
44	4606	56853	<hkxhk>		14	28.264	0.392	RACA17	ACCAATAAAATTATTCTAAGGAATCATGCATTACACCGGATGTATAACCTT	8	A	G	hk	hk	kk	hk	hh	kk	hh	hh	hk	kk	hk	hh	kk	kk	kk	hk	hk	hh	hk	hk	hk	kk	kk	hk	hk	hk	hk	kk	hk	hk	hk	kk	hk	hh	hk	kk	kk
45	4602	56834	<nnxnp>		14	28.838	0.574	RACA17	NAATTCAGATGTATTTAGTTCATGATCTGTAGTTTTTTTGTCAAAAATGCC	32	C	T	nn	np	--	np	nn	np	nn	nn	np	np	np	nn	np	np	np	nn	nn	nn	nn	nn	--	np	--	nn	np	nn	nn	np	--	--	nn	np	nn	nn	np	np	np
46	4601	56810	<nnxnp>		14	28.858	0.02	RACA17	TACCGCCACAAACTTCACATATTATTTTTAATCCCTCTTAAAAGCTATTTC	32	T	C	nn	np	np	np	nn	np	--	nn	np	np	np	nn	np	np	np	--	nn	nn	nn	nn	nn	np	np	nn	np	nn	nn	np	nn	nn	nn	np	nn	nn	np	np	np
47	4603	56835	<nnxnp>		14	29.112	0.254	RACA17	NAATTCCTGTTTATAAATCCTTTCAGACAATATTTGTGTTTAGCTTTCCTG	7	C	T	np	nn	--	nn	np	nn	np	np	nn	nn	nn	np	nn	nn	nn	np	np	np	np	np	np	nn	nn	np	nn	np	np	nn	np	np	np	nn	np	np	nn	nn	nn
48	4379	54413	<hkxhk>		14	29.963	0.851	RACA17	TTGCACCTTGGCTCAGGTCTGTCTATAAGAGAGTGTCAGTTTCATCTTATG	32	G	A	hk	hk	kk	kk	hh	kk	hh	hh	hk	kk	hk	hh	kk	kk	kk	hk	hk	hh	hk	hk	hk	kk	kk	hk	hk	hk	kk	kk	hk	hk	hk	kk	hk	hh	hk	kk	hk
49	4613	56904	<nnxnp>		14	30.777	0.814	RACA17	AAAAATCCTCTTCGTGTTAACGTCAACTCTGCAGCGAGCTGTGGGAATGTT	44	G	T	np	nn	--	nn	np	nn	np	np	nn	nn	nn	np	nn	nn	nn	np	np	np	np	np	np	nn	nn	np	nn	np	np	nn	np	np	np	nn	np	np	nn	nn	nn
50	4615	56910	<hkxhk>		14	31.329	0.552	RACA17	ATGCCATTAGAACCTGCAAAACAAGTGGAGATAATCTGTCAATAAACTGTT	31	T	C	hk	hk	--	hh	kk	hh	kk	kk	hk	hh	hk	kk	hh	hh	hh	--	hk	kk	hk	hk	hk	hh	hh	hk	hk	hk	hk	hh	hk	hk	hk	hh	hk	kk	hk	hh	hh
51	4609	56873	<lmxll>		14	31.826	0.497	RACA17	CCTCTTTCAGAAAAACACACAAGTCAAGAGAAAGTACAAGATTTATAATAT	6	T	A	lm	ll	lm	ll	ll	lm	ll	ll	ll	lm	ll	ll	lm	lm	lm	lm	lm	ll	lm	lm	lm	lm	lm	lm	ll	lm	lm	lm	lm	lm	lm	lm	lm	ll	ll	lm	lm
52	4622	56968	<nnxnp>		14	31.909	0.083	RACA17	AATATTTGACCATATTTCTTTAATAACAAACAACTGTTAATAGGTTTAGGT	9	C	A	nn	np	--	np	nn	np	nn	nn	np	np	np	nn	np	np	np	nn	nn	nn	nn	nn	nn	np	np	nn	np	nn	nn	np	--	nn	nn	np	nn	nn	np	np	nn
53	4620	56951	<nnxnp>		14	32.188	0.279	RACA17	CGTTGTTTCGTGGTCTATTCAGTGATACCTGTATATGGCGATATTTGGTTT	10	G	T	nn	np	np	np	nn	np	nn	nn	np	np	np	nn	np	np	np	nn	nn	nn	nn	nn	nn	np	np	nn	np	nn	nn	np	nn	nn	nn	np	nn	nn	np	np	nn
54	4616	56914	<efxeg>		14	32.821	0.633	RACA17	GGCAGAGGCTCGGACCCCAACGAGGCCAAGAGGAGAGCCAAACCTGCCCCG	10	G	C	ef	eg	fg	fg	ee	fg	ee	ee	eg	fg	eg	ee	fg	fg	fg	ef	ef	ee	ef	ef	ef	fg	fg	ef	eg	ef	ef	fg	ef	ef	ef	fg	ef	ee	eg	fg	fg
55	4375	54393	<nnxnp>		14	33.823	1.002	RACA17	AAATGAACTTTAAATTTTTAAAAATAATTTGTGTTTTCATTTCAATGTTTC	42	A	C	nn	np	np	np	nn	np	nn	nn	np	np	np	nn	np	np	np	nn	nn	nn	nn	nn	nn	np	np	nn	np	nn	np	np	nn	nn	nn	np	nn	nn	np	np	nn
56	4608	56867	<lmxll>		14	35.429	1.606	RACA17	TTGAGACCATTTACTACGCCGCCCTGGAGGCCAGCTGTGAGCTGGCAGCAG	10	T	C	lm	ll	lm	ll	ll	lm	ll	ll	ll	lm	ll	ll	lm	lm	lm	lm	lm	ll	lm	lm	lm	lm	lm	lm	ll	lm	lm	lm	lm	lm	lm	lm	lm	ll	ll	lm	lm
57	4380	54423	<lmxll>		14	37.182	1.753	RACA17	CTATGTAGCACATGTCTAAGCCAGTCTAAAGGTTTCCAGAGACCATCTGGA	25	C	T	lm	--	--	lm	ll	lm	ll	ll	ll	lm	ll	ll	--	lm	lm	lm	lm	ll	lm	lm	lm	lm	lm	lm	ll	lm	lm	--	lm	lm	lm	lm	lm	ll	ll	lm	lm
58	4381	54432	<lmxll>		14	37.397	0.215	RACA17	AGGGAAATTCAGGAAGACTCAAAGCTTTAGCATCCATTTAAACAGATGAAA	16	A	G	lm	ll	lm	lm	ll	lm	ll	ll	ll	lm	ll	ll	lm	lm	lm	lm	lm	ll	lm	lm	lm	lm	lm	lm	ll	lm	lm	lm	lm	lm	lm	lm	lm	ll	ll	lm	lm
59	4378	54410	<lmxll>		14	37.635	0.238	RACA17	TCTCAAGAGCTTCATACAGAAAGGGTCTTCTTTTCTAATAAGAGCATGATG	18	G	A	lm	ll	lm	lm	ll	lm	ll	ll	ll	lm	ll	ll	lm	lm	lm	lm	lm	ll	lm	lm	lm	lm	lm	lm	ll	lm	lm	lm	lm	lm	lm	lm	lm	ll	ll	lm	lm
60	4617	56926	<lmxll>		14	38.741	1.106	RACA17	TATATTTGTTTCAAACCAAAATATTTACTTCACGTATGCAAATATTTGAGG	33	G	A	lm	ll	lm	lm	ll	lm	ll	ll	ll	lm	ll	ll	lm	lm	lm	lm	lm	ll	lm	lm	lm	lm	lm	lm	ll	lm	lm	lm	lm	lm	lm	lm	lm	ll	ll	lm	lm
61	4394	54638	<lmxll>		14	39.554	0.813	RACA17	ACCGTGCTCTCATTCAGTGTCCACGTCACGTATGTGATCAGTGGATTGGCC	30	T	G	lm	ll	lm	lm	ll	lm	ll	ll	ll	lm	ll	ll	lm	lm	lm	lm	lm	ll	lm	lm	lm	lm	lm	lm	lm	lm	lm	lm	lm	lm	lm	lm	lm	ll	ll	lm	lm
62	4385	54506	<lmxll>		14	40.508	0.954	RACA17	GAGATTTGGCGTTGGGTGCAGCACGGTGAAGGTGACATAACGTCAACCAAC	12	T	C	lm	ll	lm	lm	ll	lm	ll	ll	ll	lm	ll	ll	lm	lm	lm	lm	lm	ll	lm	lm	lm	lm	lm	lm	lm	lm	lm	lm	lm	lm	lm	lm	lm	ll	ll	lm	lm
63	4417	54881	<nnxnp>		14	40.877	0.369	RACA17	GGGAGCATCTCATCGCCTCACCATGAGGAGTTGTAGTAAGTTTCAACGGTG	15	G	C	np	nn	nn	nn	np	nn	np	np	nn	nn	nn	nn	nn	nn	np	np	np	np	np	np	np	nn	nn	np	nn	np	nn	nn	np	np	np	nn	np	np	nn	nn	np
64	4415	54872	<nnxnp>		14	40.908	0.031	RACA17	TTTTGAATAATCTACATGTTAATTTGACATCTTTTGTTATGCATTTTTGAA	18	C	T	np	nn	nn	nn	np	nn	np	np	nn	nn	nn	nn	nn	nn	np	np	np	np	np	np	np	nn	nn	np	nn	np	nn	nn	np	np	np	nn	np	np	nn	nn	np
65	4416	54879	<nnxnp>		14	40.971	0.063	RACA17	GCAGGAGAAGCAGACAGTGACAGCACAGAAGTAAAGTAGACAGGAGCTGGG	4	A	G	np	nn	nn	nn	np	--	np	np	nn	nn	nn	nn	nn	nn	np	np	np	np	np	np	np	nn	nn	np	nn	np	nn	nn	np	np	np	nn	np	np	nn	nn	np
66	4414	54850	<nnxnp>		14	41.008	0.037	RACA17	GTCTCTGTATTCAGAAACATCTATAATCATTTTTGTCTGCTTGTTCTTTCA	23	T	C	np	nn	nn	nn	np	nn	np	np	nn	nn	nn	nn	nn	nn	np	np	np	np	np	np	np	--	nn	np	nn	np	nn	nn	np	np	np	nn	np	np	nn	nn	np
67	4411	54827	<nnxnp>		14	41.144	0.136	RACA17	TACACGAGTGTTTAGTCACAGCACCTCCACTGCAAAATCCATTTCTGTAGN	24	T	C	np	nn	nn	nn	np	nn	np	np	--	nn	nn	nn	nn	nn	np	np	np	np	np	np	np	nn	nn	np	nn	np	nn	nn	--	np	np	nn	np	np	nn	nn	np
68	4398	54672	<lmxll>		14	41.362	0.218	RACA17	GGCAAGTTATTCAACGACACAGCCCGAATACTCGGCTCTGACATCATATCA	14	C	G	lm	ll	lm	lm	ll	lm	ll	ll	ll	lm	ll	ll	lm	lm	lm	lm	lm	ll	lm	lm	lm	lm	lm	lm	lm	lm	lm	lm	lm	lm	lm	lm	lm	ll	ll	lm	lm
69	4391	54608	<lmxll>		14	41.494	0.132	RACA17	GAAACCCACAACTATTTAAGGAAGAATCGTGTTTTTATGAGCTTCTTTGCT	17	A	T	lm	ll	--	lm	ll	lm	ll	ll	ll	lm	ll	ll	lm	lm	lm	lm	lm	ll	lm	lm	lm	lm	lm	lm	lm	lm	lm	lm	lm	lm	lm	lm	lm	ll	ll	lm	lm
70	4393	54627	<lmxll>		14	44.172	2.678	RACA17	CCTACAGCCCAGCGTACCCCCTGAACCTGCAGTACCCCTACAACCACCAGC	31	G	C	lm	ll	ll	lm	ll	lm	ll	ll	ll	lm	ll	ll	lm	lm	lm	--	lm	ll	lm	lm	lm	lm	lm	lm	lm	lm	lm	lm	lm	lm	lm	lm	lm	ll	ll	lm	lm
71	4422	54921	<nnxnp>		14	44.542	0.37	RACA17	ACAGTAAAACTTGCTTTTTATGTTGAGAAATTAGTATAACAAGTAAAATGT	13	T	C	np	nn	nn	nn	np	nn	np	np	np	nn	nn	nn	nn	nn	np	np	np	np	np	np	np	nn	nn	np	nn	nn	nn	nn	np	np	np	nn	np	np	nn	nn	np
72	4429	55032	<hkxhk>		14	47.185	2.643	RACA17	CGCTCATCAATAAGAGATTTTGATGGAGTTTGGCTGCTTAATTAAGTAGGT	6	T	C	kk	hh	hk	hk	hk	hk	hk	hk	hk	hk	hh	hh	hk	hk	kk	kk	kk	hk	kk	hk	kk	hk	hk	hh	hk	hk	hk	hk	kk	kk	kk	hh	kk	hk	hh	hk	kk
73	4419	54910	<nnxnp>	4419	14	49.814	2.629	RACA17	AAAGTCATCATGTTCTAGATACGATTCATATTAAATATATTCTACACATGT	21	A	C	np	nn	nn	nn	np	nn	np	np	np	nn	nn	nn	nn	nn	np	np	np	np	np	np	np	nn	nn	np	nn	nn	nn	nn	np	np	np	nn	np	np	nn	nn	np
74	4420	54914	<nnxnp>	4419	14	49.814	0	RACA17	GTGTGGAAGCACAACTCTTATCCCAAAACTCTTGGACACTTTTTTGTTTGA	16	A	C	np	nn	nn	nn	np	nn	np	np	np	nn	nn	nn	nn	nn	np	np	np	np	np	np	np	nn	nn	np	nn	nn	nn	nn	np	np	np	nn	np	np	nn	nn	np
75	4433	55140	<lmxll>		14	53.809	3.995	RACA17	CTATATAACCTTATGTTTCTTCCGTTAGTTGTTCTTACAGCAGGACACACT	23	G	A	lm	ll	lm	lm	ll	ll	ll	ll	ll	lm	ll	ll	lm	lm	ll	lm	lm	ll	lm	lm	lm	lm	--	ll	lm	lm	lm	lm	--	lm	lm	ll	lm	ll	ll	lm	lm
76	4451	55438	<nnxnp>		14	55.537	1.728	RACA17	AGTCTTTCGTGGACTGGAAGTGGACAGCTGCTGCAGAGATCCTGCAAGTCG	8	G	A	nn	np	np	nn	nn	np	nn	nn	nn	np	np	np	np	np	nn	nn	nn	nn	np	np	np	np	np	np	nn	np	--	np	nn	np	np	np	nn	nn	np	np	nn
77	4450	55404	<hkxhk>		14	55.896	0.359	RACA17	GACATCTTAAAAAGTCTTCAGTGGCCTTATGGCTTTCTTCTGCTGCCATTA	20	G	A	hh	kk	--	hh	hk	kk	hk	hk	hk	kk	kk	kk	hk	hk	hk	hh	hh	hh	hk	kk	hk	hk	hk	kk	hh	hk	hk	hk	hh	hh	hk	kk	hh	hk	kk	kk	hh
78	4435	55173	<lmxll>		14	57.682	1.786	RACA17	GAACTGCAATACACAGTCTCTCATACAGAAAGAAGAGAAATTCATTTAGGG	4	T	A	ll	lm	ll	ll	lm	lm	lm	lm	lm	ll	lm	lm	ll	ll	lm	ll	ll	lm	ll	ll	ll	ll	ll	lm	ll	ll	ll	ll	ll	ll	ll	lm	ll	lm	lm	ll	ll
79	4446	55389	<hkxhk>		14	58.158	0.476	RACA17	AGAGAGAGCCCATGATTGGGTGCTGTGACAGGGTTAGTATGAAATCTGGAT	28	C	G	kk	hh	hk	kk	hk	hh	hk	hk	hk	hh	hh	hh	hk	hk	hk	kk	kk	kk	hk	hh	hk	hk	hk	hh	kk	hk	hk	hk	kk	kk	hk	hh	kk	hk	hh	hh	kk
80	4444	55320	<efxeg>		14	60.849	2.691	RACA17	AAATTGGGTTAAAGAAATGATAATACTAGAAGGGAATTTGAGAAAAAAACT	20	C	T	ee	fg	eg	ee	ef	fg	ef	ef	ef	fg	fg	fg	eg	eg	ef	ee	ee	ee	eg	fg	eg	--	eg	fg	eg	eg	eg	eg	ee	ee	eg	fg	ee	ef	fg	eg	ee
81	4448	55391	<hkxhk>		14	61.921	1.072	RACA17	GGTCACTCTGAAAGTTGCTCCAGGCCACTAATCCTCTTCTAAAAAGCAGAA	19	C	G	hh	kk	--	hh	hk	kk	hk	hk	--	kk	kk	kk	hk	hk	hk	hh	--	hh	hk	kk	hk	hk	hk	kk	hh	hk	hk	hk	hh	hh	hk	kk	hh	hk	kk	kk	hh
82	4465	55545	<lmxll>		14	62.325	0.404	RACA17	GCATGAAAGAATGGACCAAAATAGCAACTACAGTGTGTGAAAACTGGAAAC	35	T	G	lm	ll	lm	lm	ll	ll	ll	ll	ll	ll	ll	ll	lm	lm	ll	lm	lm	lm	lm	ll	lm	lm	lm	ll	lm	lm	lm	lm	lm	lm	lm	ll	lm	ll	ll	ll	lm
83	4457	55484	<hkxhk>		14	62.462	0.137	RACA17	CTGATGTGGTGTTCCAAGTCATTGTGCATTGTGGGAGTTAGGTATGTTCTG	7	G	A	hk	hk	kk	hk	hh	hk	hh	hh	hh	hk	hk	hk	kk	hk	hh	hk	hk	hk	kk	hk	kk	kk	kk	hk	hk	kk	kk	kk	hk	hk	kk	hk	hk	hh	hk	hk	hk
84	4453	55462	<hkxhk>		14	62.777	0.315	RACA17	CACCGTCTGAGTTGGACCATCTGTTCTGTCGGCTCCGGTTCTGGCTCTCAT	46	C	T	hk	hk	hh	hk	kk	hk	kk	kk	kk	hk	hk	hk	hh	hk	kk	hk	hk	hk	hh	hk	hh	hh	hh	hk	hk	hh	hh	--	hk	hk	hh	hk	hk	kk	hk	hk	hk
85	4442	55292	<lmxll>		14	63.782	1.005	RACA17	CTTCATACCTGATTTTTTTTTTTTATTTTGTTACATTTTTTCTCTTCTTTT	33	C	A	ll	lm	ll	ll	lm	lm	lm	lm	lm	lm	lm	lm	ll	--	lm	ll	ll	ll	ll	lm	ll	ll	ll	lm	ll	ll	ll	--	ll	ll	ll	lm	ll	lm	lm	ll	ll
86	4452	55444	<efxeg>		14	64.321	0.539	RACA17	CTCGGTGAAAGAGGGCGGGGCCAACATAAGCTTTTTAAATCAGTCTTCATA	12	G	T	ef	eg	fg	ef	ee	eg	ee	ee	ee	eg	eg	eg	fg	ef	ee	ef	ef	ef	fg	eg	fg	fg	fg	eg	ef	fg	fg	fg	ef	ef	fg	eg	ef	ee	eg	eg	ef
87	4467	55562	<lmxll>		14	65.69	1.369	RACA17	AGAGGAGTGGTATTAGAAGAGCCGGTGCATAGAAAGTGGGCGAATGCTGCA	12	T	G	lm	ll	lm	lm	ll	ll	ll	ll	ll	ll	ll	ll	lm	lm	ll	lm	lm	lm	lm	ll	lm	lm	lm	ll	lm	lm	lm	lm	lm	lm	lm	ll	lm	ll	ll	ll	lm
88	4456	55483	<lmxll>		14	66.199	0.509	RACA17	TCGTCCTCGAATTAAGAGACATTTACTCCGTAAATAGTTAAATGTTGAGGC	39	A	C	lm	--	lm	lm	ll	ll	ll	ll	ll	ll	ll	ll	lm	lm	ll	lm	lm	lm	lm	ll	lm	lm	lm	ll	lm	lm	lm	lm	lm	lm	lm	ll	lm	ll	ll	ll	lm
89	4478	55635	<hkxhk>		14	66.578	0.379	RACA17	AAGGAGCACTCAAGGTTTTCAGAATGAAGGAAAAATAGGACCTTTACGTCT	25	G	C	kk	hh	--	kk	hk	hk	hk	hk	hk	hh	hh	hh	hk	kk	hk	kk	hk	kk	hk	hh	hk	hk	hk	hh	kk	hk	hk	hk	--	kk	hk	hh	kk	hk	hh	hh	kk
90	4501	55868	<hkxhk>		14	67.948	1.37	RACA17	GGTCTGTTCCAGTCCCCCCACAGACCACTGAGCCCACAACAGCTGATCTGA	21	A	G	hk	hk	--	hk	hh	hk	hh	hh	hh	hk	kk	hk	kk	hk	hh	hk	kk	hk	kk	hk	kk	kk	kk	hk	hk	kk	kk	kk	hk	hk	--	hk	hk	hh	hk	hk	hk
91	4535	56175	<nnxnp>		14	68.265	0.317	RACA17	GACTGTGAGACGCCATGATGGCGGTGGCATGACCCATCATCAGAACCTGGA	11	C	G	--	np	np	nn	--	np	nn	--	nn	np	np	np	np	nn	--	nn	np	nn	np	np	np	np	np	np	nn	np	np	np	nn	nn	np	np	nn	nn	np	np	nn
92	4515	56010	<hkxhk>		14	68.433	0.168	RACA17	GGTTGGTTGAATAGTTTCAATGTTTTGACCCCAAAAAAATCCTGAAAATAA	31	C	T	hk	hk	kk	hk	--	hk	hh	hh	hh	hk	--	hk	kk	hk	--	hk	kk	hk	kk	hk	kk	kk	kk	hk	hk	kk	kk	kk	hk	hk	kk	hk	hk	hh	hk	hk	hk
93	4533	56169	<nnxnp>		14	68.469	0.036	RACA17	ACTTCCTCTCAGGCCTGCAGATGTTCCTCCTCACTCTTCATGTCATCAGTT	20	G	A	nn	np	--	nn	nn	np	nn	nn	nn	np	np	np	np	nn	nn	nn	np	nn	np	np	np	np	np	np	nn	np	np	np	nn	nn	np	np	nn	nn	np	np	nn
94	4536	56206	<nnxnp>		14	68.511	0.042	RACA17	GGACAGAGGAGCATCTGTGAGGGGGCGGGGCTTCTGAGGCTACAAGAAACA	31	T	C	nn	np	np	nn	nn	np	nn	nn	nn	np	np	np	np	nn	nn	nn	np	nn	np	np	np	np	np	np	nn	np	np	np	nn	nn	np	np	nn	nn	np	np	nn
95	4508	55929	<lmxll>	4508	14	68.65	0.139	RACA17	AAATGTTTTCTACCAGTTAAAAAACTGAAATAAAACGTGCTTTTCTGGACT	42	T	C	lm	ll	lm	lm	ll	ll	ll	ll	ll	ll	lm	ll	lm	lm	ll	lm	lm	lm	lm	ll	lm	lm	lm	ll	lm	lm	lm	lm	lm	lm	lm	ll	lm	ll	ll	ll	lm
96	4531	56146	<lmxll>	4508	14	68.65	0	RACA17	CCGTGATCCTCCTCAGGTGGAGATCAGAGATCCTGAAAGGTCTAAGGCGTC	39	G	C	lm	ll	lm	lm	ll	ll	ll	ll	ll	ll	lm	ll	lm	lm	ll	lm	lm	lm	lm	ll	lm	lm	lm	ll	lm	lm	lm	lm	lm	lm	lm	ll	lm	ll	ll	ll	lm
97	4537	56214	<lmxll>	4508	14	68.65	0	RACA17	TTACTCGTTCAGATTCTACCTTCAAACGTTGGAGGATCTTCCTCTGGAGTC	5	C	T	lm	ll	lm	lm	ll	ll	ll	ll	ll	ll	lm	ll	lm	lm	ll	lm	lm	lm	lm	ll	lm	lm	lm	ll	lm	lm	lm	lm	lm	lm	lm	ll	lm	ll	ll	ll	lm
98	4490	55779	<hkxhk>		14	68.864	0.214	RACA17	GTCAAAGGGCTAACATGGTCAAAGAAGTGAAAACATGAATCTCATTCTGTA	40	C	T	hk	hk	--	hk	hh	hk	hh	hh	hh	hk	kk	hk	kk	hk	hh	hk	kk	hk	kk	hk	kk	kk	kk	hk	hk	kk	kk	kk	--	hk	kk	hk	hk	hh	hk	hk	hk
99	4502	55872	<hkxhk>		14	68.864	0	RACA17	GTAATTTTATACCTGAGAGACAAAATCAGAAGAAAATCCATAAAATCTGAT	14	G	T	hk	hk	--	hk	kk	hk	kk	kk	kk	hk	hh	hk	hh	hk	kk	hk	hh	--	hh	hk	hh	hh	hh	hk	hk	hh	hh	hh	hk	hk	hh	hk	hk	kk	hk	hk	hk
100	4494	55798	<hkxhk>		14	68.877	0.013	RACA17	GTGTTCTGTTTTCAGCAGCAGTTTCCTCCCCAAAAATCTAATGTTTGATCC	32	A	G	hk	hk	hh	hk	--	hk	kk	kk	kk	hk	hh	hk	hh	hk	kk	hk	--	hk	hh	hk	hh	hh	hh	hk	hk	hh	hh	hh	hk	hk	hh	hk	hk	kk	hk	hk	hk
101	4513	56003	<hkxhk>		14	68.918	0.041	RACA17	CTTTTCAAGGAAGACCTGGCCTGAAAGGCATCAACTCAACTAGTGGTGGGG	19	C	G	hk	hk	kk	hk	hh	hk	hh	hh	hh	hk	kk	hk	kk	hk	hh	hk	kk	hk	kk	hk	kk	kk	kk	hk	hk	kk	kk	kk	hk	hk	kk	hk	hk	hh	hk	hk	hk
102	4486	55744	<hkxhk>	4486	14	68.918	0	RACA17	GACGAGGACAACAAATCACTCCTAGAAGCTTTTTCAAATAGCTTTTCTCGG	20	C	G	hk	hk	hh	hk	kk	hk	kk	kk	kk	hk	hh	hk	hh	hk	kk	hk	hh	hk	hh	hk	hh	hh	hh	hk	hk	hh	hh	hh	hk	hk	hh	hk	hk	kk	hk	hk	hk
103	4493	55795	<hkxhk>	4486	14	68.918	0	RACA17	TTGTCCTGGCACGACACGACAGTTTGACTCACAACATTGCAAACATTTTTC	29	C	T	hk	hk	hh	hk	kk	hk	kk	kk	kk	hk	hh	hk	hh	hk	kk	hk	hh	hk	hh	hk	hh	hh	hh	hk	hk	hh	hh	hh	hk	hk	hh	hk	hk	kk	hk	hk	hk
104	4510	55960	<hkxhk>		14	68.991	0.073	RACA17	GATTTCTGATCGGATTGTAGCATTCCTAGTTTGAATAAAGTTTGGATTTTA	34	A	T	hk	hk	--	hk	kk	hk	kk	kk	kk	hk	hh	hk	hh	hk	kk	hk	hh	hk	hh	hk	hh	hh	hh	--	hk	hh	hh	hh	hk	hk	hh	hk	hk	kk	hk	hk	hk
105	4516	56014	<lmxll>		14	69.04	0.049	RACA17	TAGATCAGCGGTGGGCAAACGTTATGACTCTTGGGCCACAAAGGGTTCTAA	43	G	T	lm	--	lm	lm	ll	ll	ll	ll	ll	ll	lm	ll	lm	lm	ll	lm	lm	lm	lm	ll	lm	lm	--	ll	lm	lm	lm	lm	lm	lm	lm	ll	lm	ll	ll	ll	lm
106	4526	56097	<nnxnp>		14	69.044	0.004	RACA17	GAATTCAGACATTGTCTTTATTTACCTGTGGTTGTTCACACCTGATTCACA	45	G	T	nn	np	--	nn	nn	np	nn	nn	nn	np	np	np	np	nn	nn	nn	np	nn	np	np	np	np	np	np	nn	np	np	np	--	nn	np	np	nn	nn	np	np	nn
107	4500	55816	<lmxll>		14	69.058	0.014	RACA17	AAATAAAAAGATGGGTTGCTTGGTTACATCCGGAGCCAGCTCCAGTGGGGT	45	T	C	lm	ll	lm	lm	ll	ll	ll	ll	ll	ll	lm	ll	lm	lm	ll	lm	lm	lm	lm	ll	lm	lm	lm	ll	lm	lm	lm	lm	lm	lm	lm	ll	lm	ll	ll	ll	lm
108	4503	55900	<efxeg>		14	69.102	0.044	RACA17	GAAGCTCTTCATGAGGAAAAGCATCTCTGTGATGATGCAGAAGGTTTATAG	36	G	T	ef	eg	fg	ef	ee	eg	ee	ee	ee	eg	fg	eg	fg	ef	ee	ef	fg	ef	fg	eg	fg	fg	fg	eg	ef	fg	fg	fg	ef	ef	fg	eg	ef	ee	eg	eg	ef
109	4524	56091	<nnxnp>		14	69.123	0.021	RACA17	GATCTTATCCATGTGATGCTGAAGGAGGGGGGGACTGATGACAAAAAACAT	20	G	A	nn	np	--	nn	nn	np	nn	nn	nn	np	np	np	np	--	nn	nn	np	nn	np	np	np	np	np	np	nn	np	np	np	--	nn	np	np	nn	nn	np	np	nn
110	4532	56153	<nnxnp>		14	69.19	0.067	RACA17	ACAATCCCTCCACTCGCTCCGGCTCGGCGATGAAAGGCTTCCTACACTCTG	36	C	G	nn	np	np	nn	nn	np	nn	nn	nn	np	np	np	np	nn	nn	nn	np	nn	np	np	np	np	np	np	nn	np	np	np	nn	nn	np	np	nn	nn	np	np	nn
111	4528	56099	<hkxhk>		14	69.226	0.036	RACA17	TTGGTCGTTCTGCTCTGACCTTTCTTCTTCTGCAGCTCAGACTGAGCTTTG	6	G	A	hk	hk	--	hk	hh	hk	hh	hh	hh	hk	kk	hk	kk	hk	hh	hk	kk	hk	kk	hk	kk	kk	kk	hk	hk	kk	kk	kk	hk	hk	kk	hk	hk	hh	hk	hk	hk
112	4507	55926	<lmxll>		14	69.428	0.202	RACA17	ACTGGTTTGCACAACTTTCTCGTGGACTTAGAAGTTAGGTAACAGTGATTG	39	T	G	lm	--	lm	lm	--	ll	ll	ll	ll	--	lm	ll	lm	lm	ll	lm	lm	lm	lm	ll	lm	lm	lm	ll	lm	lm	lm	lm	lm	lm	lm	ll	lm	ll	ll	ll	lm
113	4529	56124	<efxeg>		14	69.432	0.004	RACA17	AAGAGCAAATATCCACGATGGAGACCCAAGTATGTCGAAATTACCAATCCA	25	C	G	ef	--	fg	ef	ee	eg	ee	ee	ee	eg	fg	eg	fg	ef	ee	ef	fg	ef	fg	eg	fg	fg	fg	eg	ef	fg	fg	fg	ef	ef	fg	eg	ef	ee	eg	eg	ef
114	4534	56170	<efxeg>		14	69.433	0.001	RACA17	AGAGCCCAGACCCTGATGGTGGTCAGGCAGGACCGCACCAATCGAAGAGCC	3	G	C	ef	--	fg	ef	ee	eg	ee	ee	ee	eg	fg	eg	fg	ef	ee	ef	fg	ef	fg	eg	fg	fg	fg	eg	ef	fg	fg	fg	--	ef	fg	eg	ef	ee	--	eg	ef
115	4521	56063	<lmxll>		14	69.466	0.033	RACA17	ATAAGCTGTGAGCTTTTTCAATAGTAAATTATGATTTATGTCAAACGCAGC	4	G	C	lm	ll	lm	lm	ll	ll	ll	ll	ll	ll	lm	ll	lm	lm	ll	lm	lm	lm	lm	ll	lm	lm	lm	ll	lm	lm	--	lm	lm	lm	lm	ll	lm	ll	ll	ll	lm
116	4522	56069	<lmxll>		14	69.635	0.169	RACA17	TTGAGTAGACTGCTGAACCCCCCACGACCCGGTCCGGATGAGCGGAAGACG	29	C	T	lm	ll	lm	lm	ll	ll	ll	ll	ll	ll	lm	ll	lm	lm	ll	lm	lm	lm	lm	ll	lm	lm	lm	ll	lm	lm	lm	lm	lm	lm	lm	ll	lm	ll	ll	ll	lm
117	4527	56098	<lmxll>		14	69.67	0.035	RACA17	GAATTCCTCCAGCTGCTCTTGGATTCCAGAATCTCTTCAGTTCTTCATGTT	40	T	C	--	ll	lm	lm	ll	ll	ll	ll	ll	ll	lm	ll	lm	lm	ll	lm	lm	lm	lm	ll	lm	lm	lm	ll	lm	lm	lm	lm	lm	lm	lm	ll	lm	ll	ll	ll	lm
118	4484	55719	<hkxhk>		14	69.8	0.13	RACA17	GTTCTCACCGCAGACCCAACTCAAATACCACGCATGCATATTAATCCCAGT	19	C	T	hk	hk	--	hk	kk	hk	kk	kk	kk	hk	hh	hk	hh	hk	kk	hk	hh	hk	hh	hk	hh	hh	hh	hk	hk	hh	hh	hh	--	hk	hh	hk	hk	kk	hk	hk	hk
119	4511	55993	<lmxll>		14	70.754	0.954	RACA17	GTGACCCCCAATGCTGGATCACAACTTTTTACACCATTTTCAAATGTCAAG	31	C	A	lm	ll	--	lm	ll	ll	ll	ll	ll	ll	lm	ll	lm	lm	ll	lm	lm	lm	lm	ll	lm	lm	lm	ll	lm	lm	lm	lm	lm	lm	lm	ll	lm	ll	ll	ll	lm
120	4505	55913	<efxeg>		14	71.05	0.296	RACA17	GCACCAAGTCCAGTTCACTCGTGTTGCTCCATAAAAATCGTCAAAAAATAT	20	G	A	ef	eg	fg	ef	ee	eg	ee	ee	ee	eg	fg	eg	fg	ef	ee	ef	fg	ef	fg	eg	fg	fg	fg	eg	ef	fg	fg	fg	ef	--	fg	eg	ef	ee	eg	eg	ef
121	4514	56004	<efxeg>		14	71.213	0.163	RACA17	GACAGAACCAGGAAAAGCCTCAAATTGGAATTTCTCAAATCAAAACACATC	38	A	G	ef	eg	--	ef	ee	eg	ee	ee	ee	eg	fg	eg	fg	--	ee	ef	fg	ef	fg	eg	fg	fg	fg	eg	ef	fg	fg	fg	ef	fg	fg	eg	--	ee	eg	eg	ef
122	4530	56128	<lmxll>		14	71.559	0.346	RACA17	NAATTCCTCCATGGTTGTCTGACAGGTTTGTGCAGCTTTTGATACCGGCTT	9	C	T	lm	--	--	lm	ll	ll	ll	ll	ll	--	lm	ll	lm	lm	--	lm	lm	lm	lm	ll	lm	lm	lm	--	lm	lm	lm	ll	lm	lm	lm	ll	lm	ll	ll	ll	lm
123	4477	55624	<hkxhk>		14	71.804	0.245	RACA17	ACAACATGCCGACAGTCAGCTACCTAGAGGTGATGCACATCTTTACGGTTC	40	C	G	kk	hh	hk	kk	hk	hh	hk	hk	hk	hh	hh	hh	hk	kk	hk	kk	hk	kk	hk	hh	hk	hk	hk	hh	kk	hk	hk	hk	--	kk	hk	hh	kk	hk	hh	hh	kk
124	4512	56001	<lmxll>		14	72.938	1.134	RACA17	GCAGCTTTCTCTGGATTTATGACCAGATATAAGATACTCTGAGGTCACCAG	18	A	G	lm	ll	lm	lm	ll	ll	ll	ll	ll	ll	lm	ll	lm	lm	ll	lm	lm	lm	lm	ll	lm	lm	lm	ll	lm	lm	lm	lm	lm	lm	lm	ll	lm	ll	ll	ll	lm
125	4480	55672	<hkxhk>		14	73.141	0.203	RACA17	TTTTATTTTATTGTTATTAATGTCCGTATGTTACCTTGCCCTTATTTCTAA	25	G	C	hh	kk	hk	hh	hk	kk	hk	hk	hk	kk	hk	kk	hk	hh	hk	hh	hk	hh	hk	kk	hk	hk	hk	kk	hh	hk	hk	hk	hh	hh	hk	kk	hh	hk	--	kk	hh
126	4485	55733	<lmxll>	4485	14	73.261	0.12	RACA17	TTTAGTCGGTTTGTGAACCCGGTCCAGGTGTCGTTCAGGGTCGGGGTTTCG	46	T	A	lm	ll	lm	lm	ll	ll	ll	ll	ll	ll	lm	ll	lm	lm	ll	lm	lm	lm	lm	ll	lm	lm	lm	ll	lm	lm	lm	lm	lm	lm	lm	ll	lm	ll	ll	ll	lm
127	4488	55760	<lmxll>	4485	14	73.261	0	RACA17	CATCGTAATAAACTATTTATTTAACTCTGGAAAGCTACTTGAATCTGCACA	31	A	G	lm	ll	lm	lm	ll	ll	ll	ll	ll	ll	lm	ll	lm	lm	ll	lm	lm	lm	lm	ll	lm	lm	lm	ll	lm	lm	lm	lm	lm	lm	lm	ll	lm	ll	ll	ll	lm
128	4482	55689	<lmxll>		14	73.36	0.099	RACA17	CTTTTGAAAGCTGATGAGTAATGTCAGTGATGACAGGAAGACGCTGGGGAG	8	A	T	lm	ll	--	lm	ll	ll	ll	ll	ll	ll	lm	ll	lm	lm	ll	--	lm	lm	lm	ll	lm	lm	lm	ll	lm	lm	lm	lm	lm	lm	lm	ll	lm	ll	ll	ll	lm
129	4479	55639	<lmxll>		14	73.646	0.286	RACA17	TTAGCAGTGAGAGTGAATGAGTCCAGCAGCTGGTAGCATATGGGGTCCTTC	23	C	T	lm	ll	lm	lm	ll	ll	ll	ll	ll	ll	ll	ll	lm	lm	ll	lm	lm	lm	lm	ll	lm	lm	lm	ll	lm	lm	lm	lm	lm	lm	lm	ll	lm	ll	ll	ll	lm
130	4517	56017	<efxeg>		14	74.246	0.6	RACA17	CACATTTAAAAGGAGTTGATGAAATCCATTGAGTCAGACTTCACAAACTCA	28	T	C	ef	eg	--	--	ee	eg	ee	ee	ee	eg	fg	eg	fg	--	ee	ef	fg	ef	fg	eg	fg	fg	fg	eg	ef	fg	fg	fg	ef	--	fg	eg	ef	ee	eg	eg	ef
131	4498	55810	<hkxhk>		14	74.521	0.275	RACA17	GAATTCCTCAGCTTCCCGTCGAGTCCTCTGTGATCGCCTGTCTGAGGAACT	35	G	A	hk	hk	--	hk	hh	hk	hh	hh	hh	hk	kk	hk	kk	hk	hh	hk	kk	hk	kk	hk	kk	kk	kk	hk	--	kk	kk	kk	hk	hk	kk	hk	hk	hh	hk	hk	hk
132	4499	55811	<efxeg>		14	75.091	0.57	RACA17	GAATTCAATGAAACACGACAATGCTTCTGTAAGAAAACAAACAGGCCAGCG	8	T	A	ef	eg	fg	ef	ee	eg	ee	ee	ee	eg	fg	ee	fg	ef	ee	ef	fg	ef	fg	eg	--	fg	--	--	ef	fg	fg	fg	ef	ef	fg	eg	ef	ee	eg	eg	ef
133	4489	55769	<hkxhk>		14	75.217	0.126	RACA17	AACATCTTCATGAAAGCTGGAGTTTAAAAAATATATATATGTCACTTTGTT	31	T	A	hk	hk	kk	hk	hh	hk	hh	hh	hh	hk	kk	hk	kk	hk	hh	hk	kk	hk	kk	hk	kk	kk	kk	hh	hk	kk	kk	kk	--	hk	kk	hk	hk	hh	hk	hk	hk
134	5536	72027	<nnxnp>		14	75.43	0.213	sc08363	GAGCTGCTAATCCTTCACCACAGGGTGCCAATCTGGCCACAGCCTCAGACC	18	T	C	nn	np	--	nn	nn	np	nn	nn	nn	np	np	np	np	nn	nn	--	np	nn	np	np	np	np	np	np	nn	np	np	np	--	nn	np	np	nn	nn	np	np	nn
135	4487	55753	<nnxnp>	4487	14	75.439	0.009	RACA17	AACAAACAATGCTAAGTCTGCTAGCTTGATGCTAACGTTTAATTGGAATTN	6	C	T	nn	np	np	nn	nn	np	nn	nn	nn	np	np	np	np	nn	nn	nn	np	nn	np	np	np	np	np	np	nn	np	np	np	nn	nn	np	np	nn	nn	np	np	nn
136	4495	55803	<nnxnp>	4487	14	75.439	0	RACA17	TCACATCAGATTCTCCTGATGGATTTGGTACAACACAGATTCTATTTTAAA	24	C	T	nn	np	np	nn	nn	np	nn	nn	nn	np	np	np	np	nn	nn	nn	np	nn	np	np	np	np	np	np	nn	np	np	np	nn	nn	np	np	nn	nn	np	np	nn
137	4491	55780	<nnxnp>	4491	14	75.494	0.055	RACA17	GAACCGTGCACATGCGTACGTTTTTTTCTTCTTCTGTTTCATTTAAAGGCA	6	T	C	nn	np	np	nn	nn	np	nn	nn	nn	np	np	np	np	nn	nn	nn	np	nn	np	np	np	np	np	np	nn	np	np	np	--	nn	np	np	nn	nn	np	np	nn
138	4497	55809	<nnxnp>	4491	14	75.494	0	RACA17	TGAGTAAACGGCCCCTAACTTCTGTCTCTAAATTAGAAGAAAACCCACAGG	5	G	A	nn	np	np	nn	nn	np	nn	nn	nn	np	np	np	np	nn	nn	nn	np	nn	np	np	np	np	np	np	nn	np	np	np	--	nn	np	np	nn	nn	np	np	nn
139	4472	55591	<lmxll>		14	76.103	0.609	RACA17	CATCCTGACTAATAGCTTTTTAATTGACTATCACTGTCAAGCAGTTCTACT	39	A	T	lm	ll	lm	lm	ll	ll	ll	ll	ll	ll	ll	ll	lm	lm	ll	lm	lm	lm	lm	ll	lm	lm	lm	ll	lm	lm	lm	lm	lm	lm	lm	ll	lm	ll	ll	ll	lm
140	4469	55586	<lmxll>		14	76.191	0.088	RACA17	TGGCTCTTTCTCCCGTCCGTTTTCCCTCCAAATCCTTCATAAACACTGTTT	13	C	A	lm	ll	lm	lm	ll	ll	ll	ll	ll	ll	ll	ll	lm	lm	ll	lm	lm	lm	lm	ll	lm	lm	lm	ll	lm	lm	lm	lm	--	lm	lm	ll	lm	ll	ll	ll	lm
141	4440	55265	<lmxll>		14	80.048	3.857	RACA17	GCTTATTCTTCATTATAACTCTGATAAGTTGACACTGAAAGTACCAGTTTC	41	T	A	ll	lm	ll	ll	lm	lm	lm	lm	lm	lm	lm	lm	ll	ll	lm	ll	ll	ll	ll	lm	ll	ll	ll	lm	ll	ll	ll	ll	ll	ll	ll	lm	ll	lm	lm	ll	ll
142	4470	55587	<nnxnp>		14	81.03	0.982	RACA17	AAAAGTAAAAAATACAGATAATAGCTCATATCTGATTCTCAGATCAATATT	26	T	C	np	nn	nn	np	np	nn	np	np	np	nn	nn	nn	nn	np	np	np	np	np	nn	nn	nn	nn	nn	nn	np	nn	nn	nn	np	np	nn	nn	np	np	nn	nn	np
1	641	7301	<nnxnp>		15	0		RACA20	TTTCATTTGACAAGACATAGTTTACTCGGTAAAATAAAGTACAAAAATAGC	27	G	T	nn	np	nn	nn	np	np	nn	np	np	np	nn	np	np	--	np	nn	np	nn	nn	nn	nn	nn	np	np	np	nn	np	nn	--	nn	np	nn	nn	nn	nn	nn	nn
2	640	7297	<nnxnp>		15	0.922	0.922	RACA20	GCAAGAGAGAATGGACCATAGTAGCAGCTATAGTGTCTTCAAACCTGATGA	20	G	A	nn	np	--	nn	np	np	nn	np	np	np	nn	np	np	nn	np	--	np	nn	nn	nn	nn	nn	--	np	np	nn	np	nn	--	nn	np	nn	nn	nn	nn	nn	nn
3	644	7311	<nnxnp>		15	3.109	2.187	RACA20	NAATTCTGGCTTTAATTAAAATTGTTTTCTTTTTTTCAGAAATTAAACTTT	18	A	C	nn	np	--	nn	np	np	nn	np	np	np	nn	np	np	nn	np	nn	np	nn	nn	nn	nn	nn	np	np	np	nn	np	nn	np	nn	np	nn	nn	nn	nn	nn	nn
4	689	7857	<lmxll>		15	9.547	6.438	RACA20	NAATTCCAGAACAATGTCGGCGGTTGCTCCACAGCCGGGGCGTCAACTCGT	20	C	T	ll	ll	--	ll	ll	ll	ll	lm	ll	lm	lm	ll	lm	ll	ll	--	ll	lm	lm	ll	lm	lm	ll	ll	ll	lm	ll	ll	--	lm	ll	ll	lm	lm	lm	lm	ll
5	660	7474	<nnxnp>		15	10.569	1.022	RACA20	NAATTCCCTCTGTTTACACCGCTACAACGTGGGTCGCAGTGATTGAACTAT	43	T	G	np	nn	--	np	nn	nn	np	nn	nn	nn	np	nn	nn	np	nn	np	nn	np	np	np	np	np	nn	nn	nn	np	nn	np	nn	np	nn	np	np	nn	np	np	np
6	692	7903	<lmxll>		15	11.448	0.879	RACA20	NAATTCACACATACAGTTCTTAGAAAGTGCTGGGGGCTGCACATTGTTGAT	40	A	G	lm	ll	--	ll	ll	ll	ll	lm	ll	lm	lm	ll	lm	ll	ll	lm	ll	lm	lm	ll	lm	lm	ll	ll	ll	--	ll	ll	--	lm	ll	ll	lm	lm	lm	lm	ll
7	667	7563	<nnxnp>		15	11.742	0.294	RACA20	TTTAAAAAGTCACAGTTTAGACCTTCAAATAGGAGAAAATTAAGATGAAAC	35	A	G	np	np	np	np	nn	nn	np	nn	nn	nn	np	nn	nn	np	nn	np	nn	np	np	np	np	np	nn	nn	nn	np	nn	np	nn	np	nn	np	np	nn	np	np	np
8	668	7565	<nnxnp>		15	12.998	1.256	RACA20	GGAGAGTTTGGAAACTTGGACTTTTTGTTTGGGAACCTCCAAAGCATGGAG	37	G	T	np	nn	np	np	nn	nn	np	nn	nn	nn	np	nn	nn	np	nn	np	nn	np	np	np	np	np	nn	nn	nn	np	nn	np	--	np	nn	np	np	nn	np	np	np
9	675	7640	<nnxnp>		15	14.386	1.388	RACA20	TTGCAATAAGAAATTTGATCTGTTTTATCTTAGCTTTTGCGATGTTTAAAA	20	C	T	nn	np	nn	nn	np	np	nn	np	np	np	nn	np	np	nn	np	--	np	nn	nn	nn	nn	nn	np	np	nn	nn	np	nn	np	nn	np	nn	nn	np	nn	nn	nn
10	662	7496	<nnxnp>		15	14.444	0.058	RACA20	GTGGTGTGATGTTTTTTTTTTTCAAGAAATATTATTTTTTTATGTATTTTT	33	C	A	np	nn	np	np	nn	nn	np	nn	nn	nn	np	nn	nn	np	nn	np	nn	np	np	np	np	np	nn	nn	nn	np	nn	np	nn	np	nn	np	np	nn	np	np	np
11	663	7497	<nnxnp>		15	14.555	0.111	RACA20	TTCGCCAAACTTGAGACAGTTAAATGGATTTCAAAATAAAATCTGCATGAA	18	A	G	np	nn	np	np	nn	nn	np	nn	nn	--	np	nn	nn	np	nn	np	nn	np	np	np	np	np	nn	nn	nn	np	nn	np	--	np	nn	np	np	nn	np	np	np
12	661	7491	<nnxnp>	661	15	14.561	0.006	RACA20	TGTATATTTTCAGAGAAAAGGCCTCTGACACCACAGATACAATGAGACAGA	5	G	A	np	nn	np	np	nn	nn	np	nn	nn	nn	np	nn	nn	np	nn	np	nn	np	np	np	np	np	nn	nn	nn	np	nn	np	nn	np	nn	np	np	nn	np	np	np
13	666	7562	<nnxnp>	661	15	14.561	0	RACA20	GGGCTTTGATCAGACGGTTCAGGACAGGTGTATTCCTGACTCAGCGACACC	14	C	T	np	nn	np	np	nn	nn	np	nn	nn	nn	np	nn	nn	np	nn	np	nn	np	np	np	np	np	nn	nn	nn	np	nn	np	nn	np	nn	np	np	nn	np	np	np
14	659	7469	<nnxnp>		15	14.622	0.061	RACA20	NAATTCAGTCTGTATTTTGGATAAATTTTTGATTATTAATTGAGTGTAGGT	22	T	A	np	nn	np	np	nn	nn	np	nn	nn	nn	np	nn	nn	np	nn	np	nn	np	np	np	np	np	nn	nn	nn	np	nn	np	nn	--	nn	np	np	nn	np	np	np
15	665	7558	<nnxnp>		15	14.665	0.043	RACA20	CCCTACAGTTGGAGGGGCAAGGAGAAGAGGTAGGGGTAAAGGAAGAATTCN	27	A	C	np	nn	--	np	nn	nn	np	nn	nn	nn	np	nn	nn	np	nn	np	nn	np	np	np	np	np	nn	nn	nn	np	nn	np	nn	np	nn	np	np	nn	np	np	np
16	656	7442	<hkxhk>		15	16.732	2.067	RACA20	GTAGTTACTTGGTTTGGTTTACAAGCTTTGATCTGGAAAACAATAGCCTGA	44	A	T	hk	hk	kk	kk	hh	hh	kk	hh	hk	hk	kk	hk	hh	kk	hk	hk	hk	hk	hk	kk	hk	hk	hh	hh	hk	kk	hk	kk	--	hk	hk	kk	hk	kk	hk	hk	kk
17	669	7578	<nnxnp>		15	18.557	1.825	RACA20	AGAGGTGGACAGAATTTGTGAAAATAGATGGACTGTTAAAAAGCGCTAAAG	9	C	A	np	--	np	np	nn	nn	np	nn	nn	--	np	nn	nn	np	nn	np	nn	np	np	np	np	np	nn	nn	nn	np	nn	np	nn	np	nn	np	np	nn	np	np	np
18	674	7626	<nnxnp>		15	20.471	1.914	RACA20	TCATTTTCTGATGTTTCGTCTTTATTGATCATTCATTTTTCACATTATTTT	10	A	G	nn	np	nn	nn	np	np	--	np	np	np	nn	np	np	nn	np	nn	np	nn	nn	nn	nn	nn	np	np	nn	nn	np	nn	np	nn	np	nn	nn	np	nn	nn	nn
19	657	7452	<hkxhk>		15	22.447	1.976	RACA20	TTTATGAACCATTTAGATGACAATTGTGTTTTGAGTGTCTTCAACATGTTC	33	A	G	hk	hk	hh	hh	kk	kk	hh	kk	hk	hk	hh	hk	kk	hh	hk	hk	hk	hk	hk	hh	hk	hk	kk	kk	hk	hh	hk	hh	kk	hk	hk	hh	hk	hk	hk	hk	hh
20	634	7213	<hkxhk>		15	26.191	3.744	RACA20	TGACAAATCACCATGGTGAGTAAAGGAGTCTCATTAGAGGTGAGGGCTTAA	11	C	T	hk	hk	hk	kk	hh	hh	kk	hh	hk	hk	kk	hk	hh	kk	hk	hk	hk	hk	kk	kk	hk	hk	hh	hh	hk	hk	hk	kk	hh	hk	hk	kk	hk	kk	hk	hk	hk
21	633	7209	<hkxhk>		15	26.456	0.265	RACA20	GGGTTGTCCCCAACTCCAAAAAGGAAGAGCTGTCCCCTTCTTTGTAACCAT	29	C	T	hk	hk	hk	kk	hh	hh	kk	hh	hk	hk	kk	hk	hh	kk	hk	hk	hk	hk	kk	kk	hk	hk	hh	hh	hk	hk	hk	kk	hh	hk	hk	kk	hk	kk	hk	hk	hk
22	696	7953	<nnxnp>		15	28.945	2.489	RACA20	GTATCCATCTTCTCCTGTTCAGTCTTTTTTCTCTCCGTCCGTCTATACGCT	41	T	C	np	nn	--	np	nn	nn	np	np	nn	nn	np	np	nn	np	nn	np	nn	np	np	np	nn	np	nn	nn	np	np	nn	np	--	np	nn	np	np	nn	np	np	np
23	794	8956	<nnxnp>		15	29.345	0.4	RACA20	ACTGAATCTCCTACATGTTCCGGTGGCCTTTATCTACAGGATAAGTGAGAC	47	G	A	np	nn	--	np	nn	nn	np	np	nn	nn	nn	nn	np	np	np	--	nn	np	nn	np	np	np	nn	--	nn	nn	nn	np	--	np	nn	nn	np	np	np	np	nn
24	754	8483	<hkxhk>		15	30.025	0.68	RACA20	GCTTTTCCAGGGACATCGAGTTTCTGTCCGACGTGGGTGAAAAGAAGTGTC	16	C	T	hh	kk	kk	hk	kk	kk	hk	hh	kk	hk	hh	hk	hk	hk	kk	hh	hk	hh	hh	hk	hk	hh	kk	kk	hk	hh	hk	hk	hk	hh	kk	kk	hh	hk	hh	hh	hk
25	715	8119	<nnxnp>		15	30.463	0.438	RACA20	CCAGAATGGATGAGATTATCCAGCTGATGTGGCTGAAACAATCCGTCTATT	42	C	A	np	nn	nn	np	nn	nn	np	np	nn	nn	np	np	nn	np	nn	np	nn	np	np	np	nn	np	nn	nn	np	np	nn	np	nn	np	nn	nn	np	nn	np	np	np
26	795	8990	<nnxnp>		15	30.499	0.036	RACA20	TTTCTGCAGCGACTCACGTTTGAAACCAGTTTGTTCTTTAGGGAAGTTTCA	9	C	T	np	nn	np	np	nn	nn	np	np	nn	nn	nn	nn	np	np	np	nn	nn	np	nn	np	np	np	nn	nn	nn	nn	nn	np	--	np	nn	nn	np	np	np	np	nn
27	622	7042	<lmxll>		15	31.615	1.116	RACA20	TTGTAATTTCACAGATTTAATTAGAAATGTGTCTGTAGGACCATAAACACG	19	A	C	ll	lm	ll	lm	ll	ll	lm	ll	lm	lm	lm	lm	ll	lm	lm	ll	lm	ll	lm	lm	ll	ll	ll	ll	lm	lm	lm	lm	ll	ll	lm	lm	ll	lm	ll	ll	lm
28	716	8120	<nnxnp>		15	31.703	0.088	RACA20	CTCAGATTCAGGTCAACACTCCCATGTCTACGGTCTTACCTACACAGGTGA	41	G	A	nn	np	np	nn	np	np	nn	nn	np	np	nn	nn	np	nn	np	nn	np	nn	nn	nn	np	nn	np	np	nn	nn	np	nn	np	nn	np	np	nn	np	nn	nn	nn
29	694	7937	<nnxnp>		15	31.944	0.241	RACA20	TTAAAGAACAAGTTCCATATTTTGAGTCTACTAAAGAGAAAAAATGAACAA	14	C	A	nn	np	np	nn	np	np	nn	nn	np	np	nn	nn	np	nn	np	nn	np	nn	nn	nn	np	nn	np	np	nn	nn	--	nn	np	nn	np	nn	nn	np	nn	nn	nn
30	628	7125	<hkxhk>		15	33.528	1.584	RACA20	CTAGAAAAAAAACCAAAGTCGTGGACAGTTGTCTCTGCTGCTGTAAGGGGA	18	T	A	hk	hk	hk	kk	hh	hh	kk	hh	hk	hk	kk	hk	hh	kk	hk	hk	hk	hk	kk	kk	hk	hk	hh	hh	hk	hk	hk	kk	hh	hk	hk	kk	hk	kk	hk	hk	hk
31	629	7150	<hkxhk>		15	33.538	0.01	RACA20	NAATTCAGATTTTCATTTTTACAAATTTACTTTAATACGCTACAGCCCTGA	13	C	A	--	hk	hk	hh	kk	kk	hh	kk	hk	hk	hh	hk	kk	hh	hk	hk	hk	hk	hh	hh	hk	hk	kk	kk	hk	hk	hk	hh	kk	hk	hk	hh	hk	hh	hk	hk	hk
32	623	7048	<hkxhk>		15	33.818	0.28	RACA20	TGTGTTATTTCTTTCTCTTAAGAGGTAAATTACCAAAACCCGCCACAAATC	14	C	G	hk	hk	hk	hh	kk	kk	hh	kk	hk	hk	hh	hk	kk	hh	hk	hk	hk	hk	hh	hh	hk	hk	kk	kk	hk	hk	hk	--	kk	hk	hk	hh	hk	hh	hk	hk	hk
33	790	8814	<nnxnp>		15	35.275	1.457	RACA20	TTTTACTATTTTTATGGAAACTGAGATCAGCAATCTAAAAATAAAGTGAGA	36	T	A	np	np	--	nn	np	np	nn	nn	np	nn	np	np	nn	nn	nn	np	np	nn	np	nn	nn	nn	np	np	np	np	np	nn	np	nn	np	np	nn	nn	nn	nn	np
34	801	9142	<lmxll>		15	36.504	1.229	RACA20	CCATCAGAAATTCTCCCCCTGTACCTCTCAAGGTTTGTTTAGTTCCCGTGT	30	A	G	ll	lm	ll	lm	ll	ll	lm	ll	lm	lm	lm	ll	ll	lm	lm	ll	lm	ll	lm	lm	ll	ll	ll	lm	lm	lm	lm	ll	ll	ll	lm	lm	ll	lm	ll	ll	lm
35	744	8350	<nnxnp>		15	36.659	0.155	RACA20	GGGTCTAAGTGCAGACGTCCTCCCATGCAGCAGGGGGCAGCATACAATAGG	39	G	T	--	np	np	nn	np	np	nn	nn	np	np	nn	nn	np	nn	np	nn	np	nn	nn	nn	np	nn	np	np	nn	nn	np	nn	np	nn	np	np	nn	np	nn	nn	nn
36	799	9087	<lmxll>		15	37.309	0.65	RACA20	TACTTATCAACAATAAATGGGACACTTCTAAAATGAGCTAATTTATGAAAC	10	C	T	ll	lm	ll	lm	ll	ll	lm	ll	lm	lm	lm	ll	ll	lm	lm	ll	lm	ll	lm	lm	ll	ll	ll	--	lm	lm	lm	ll	ll	ll	lm	lm	ll	lm	ll	ll	lm
37	597	6580	<lmxll>		15	37.475	0.166	RACA20	ATAATCCTGTTAAGTTTTAATCCTGGAATTTTGGAAATCATTTTGTTAATA	38	C	A	ll	lm	ll	lm	ll	ll	lm	ll	lm	lm	lm	ll	ll	lm	lm	ll	lm	ll	lm	lm	ll	ll	ll	ll	lm	lm	lm	ll	ll	ll	lm	lm	ll	lm	--	ll	lm
38	800	9134	<lmxll>		15	37.595	0.12	RACA20	AGCTGAGGACCTGGTTGATGTGTTGAGGTAAGTTTCCTCCTTACATGTTGC	43	C	G	ll	lm	ll	lm	ll	ll	lm	ll	lm	lm	lm	ll	ll	lm	lm	ll	lm	ll	lm	lm	ll	ll	ll	ll	lm	lm	lm	ll	ll	ll	lm	lm	ll	lm	ll	ll	lm
39	606	6699	<efxeg>		15	38.037	0.442	RACA20	TTAGATCAATGTGACTTGTCAACAAAGCAAGCCTTCATATCAGTGTCAATA	6	C	G	eg	ef	eg	fg	ee	ee	fg	ee	ef	ef	ef	ee	ee	fg	ef	eg	ef	eg	fg	fg	eg	eg	ee	ee	ef	ef	ef	eg	ee	eg	ef	fg	eg	fg	eg	eg	ef
40	757	8524	<nnxnp>		15	40.853	2.816	RACA20	CTTATGCCTCGTGTCCACTGAATGATCCGGATCACTCCGCTCCAGGCCGGT	34	A	C	nn	nn	--	nn	nn	nn	np	np	nn	np	nn	nn	np	np	np	nn	nn	np	nn	np	np	nn	np	nn	nn	nn	nn	np	--	np	nn	nn	np	nn	np	np	nn
41	3805	46490	<lmxll>		15	42.098	1.245	RACA19	TAACTCAAAGATGTCCTACTTTTTTCTTGGTTTCTCATATCCTTCCCAAAC	33	C	T	ll	lm	ll	lm	ll	ll	lm	ll	lm	lm	lm	ll	ll	lm	lm	ll	lm	lm	lm	lm	ll	ll	ll	ll	lm	lm	lm	ll	ll	lm	ll	ll	ll	lm	ll	lm	lm
42	764	8620	<nnxnp>		15	42.925	0.827	RACA20	GGGTGTATGCATGTTTTACCCTTGAAGAGGAGCTCTGCTATCTCATACAGT	31	A	G	np	np	nn	nn	np	np	nn	nn	np	nn	np	np	nn	nn	nn	np	np	nn	np	nn	nn	np	np	np	np	np	np	nn	--	nn	np	np	nn	nn	nn	nn	np
43	3809	46512	<lmxll>		15	43.007	0.082	RACA19	TTAGCCCAGGTGTCAACAATCCTTTCATATATGGAGGCAACACTCACCCGG	22	T	C	ll	lm	ll	lm	ll	ll	lm	ll	lm	lm	lm	ll	ll	lm	lm	ll	lm	lm	lm	lm	ll	ll	ll	ll	lm	lm	lm	ll	ll	lm	ll	ll	ll	lm	ll	lm	lm
44	614	6779	<lmxll>		15	44.107	1.1	RACA20	CTTTCCTGATGCCTGCATTAATTGAACAGAATCCCCCCCACATTGTAAGAC	9	T	C	--	lm	ll	lm	ll	ll	lm	ll	lm	lm	lm	ll	ll	lm	lm	ll	lm	ll	lm	lm	ll	ll	ll	ll	lm	lm	lm	ll	ll	ll	lm	lm	ll	lm	ll	ll	lm
45	759	8549	<nnxnp>		15	44.742	0.635	RACA20	CTGTAAATCAGCTTAAATCTTCCTTCCAAATGTATGAAAAGTACTCTGTTT	45	C	T	nn	nn	np	np	nn	nn	--	np	nn	np	nn	nn	np	np	np	nn	nn	np	nn	np	np	nn	np	nn	nn	nn	nn	np	nn	np	nn	nn	np	nn	np	np	nn
46	776	8718	<lmxll>		15	45.712	0.97	RACA20	TGTTGTCTGGTGATGCTCATGAGTCTGTGGTTTCTGCTCTGTGATGCCCTT	14	G	T	lm	ll	lm	ll	lm	lm	ll	lm	ll	ll	ll	lm	lm	ll	ll	lm	ll	ll	ll	ll	lm	lm	lm	lm	ll	ll	ll	--	--	ll	ll	ll	lm	ll	lm	ll	ll
47	762	8597	<nnxnp>		15	46.303	0.591	RACA20	GGGGTTGATAGTGGCGTTTGGTGTGTATGTAGCTGTCACACAGTATTAGCG	4	C	T	nn	nn	--	np	--	nn	np	np	nn	np	nn	nn	np	np	np	nn	nn	np	nn	np	np	nn	nn	nn	nn	nn	nn	np	nn	np	nn	nn	np	np	np	np	nn
48	778	8727	<lmxll>		15	47.009	0.706	RACA20	GTAATTCAATCGGTTAAATCAGTTCCACTCTTTCTGACATGAGGAAGAATA	26	A	T	lm	ll	--	ll	lm	lm	ll	lm	ll	ll	ll	lm	lm	ll	ll	lm	ll	ll	ll	ll	lm	lm	lm	lm	ll	ll	ll	lm	lm	ll	ll	ll	lm	ll	lm	ll	ll
49	773	8678	<lmxll>		15	48.758	1.749	RACA20	GCCTGAGCGCTGAGCTGAGAATGCCTCATTTCCTAAAGCACACACACAAGA	39	A	G	ll	lm	--	lm	ll	ll	lm	ll	lm	lm	lm	ll	ll	lm	lm	ll	lm	lm	lm	lm	ll	ll	ll	ll	lm	lm	lm	ll	ll	lm	lm	lm	ll	lm	ll	lm	lm
50	3810	46541	<lmxll>		15	50.063	1.305	RACA19	AGTGAAGTCTACTGTACTAGAAAGTCTGAAAAATGTGGAGAAAACAAACAC	6	G	A	ll	lm	--	lm	ll	ll	lm	ll	lm	lm	lm	ll	ll	lm	lm	ll	lm	lm	lm	lm	ll	ll	ll	ll	lm	lm	lm	ll	ll	lm	ll	ll	ll	lm	ll	lm	lm
51	783	8762	<lmxll>		15	50.123	0.06	RACA20	GAAAGGTTTCCAGGAAACATTTGAATTTTTTTGTGGTGCTTTCTAAAATAC	9	C	T	lm	ll	--	--	lm	lm	ll	lm	ll	ll	ll	lm	lm	ll	ll	lm	ll	ll	ll	ll	lm	lm	lm	lm	ll	ll	ll	lm	lm	ll	ll	ll	lm	ll	lm	ll	ll
52	1191	14160	<hkxhk>		15	50.409	0.286	RACA32	CTCTTTAAAATTGTATTAAAAAATGTTTTATTATTTAAAAATATTCTTACT	40	A	T	kk	hk	hk	hk	kk	kk	hk	hk	hk	hk	hk	kk	hk	hh	hh	kk	hh	hh	hk	hh	hk	kk	hk	kk	hk	hk	hk	hk	kk	hh	hk	hk	hk	hk	hk	hh	hk
53	779	8728	<lmxll>		15	50.485	0.076	RACA20	TATGAGAGTCTGTGGAGACAAACCTGAGAAAAAGTCCTCTCTGACAGACAG	16	G	A	lm	ll	--	ll	lm	lm	ll	lm	ll	ll	ll	lm	lm	ll	ll	lm	ll	ll	ll	ll	lm	lm	lm	lm	ll	ll	ll	lm	lm	ll	ll	ll	lm	ll	lm	ll	ll
54	5378	68862	<efxeg>		15	50.543	0.058	sc00302	TTTGATTTCAGTGTTTGTTAGTGTTTGTTGTGTTTCTAGGTCAGGTATGTA	29	G	A	ee	ef	ee	ef	ee	ee	ef	eg	ef	fg	ef	ee	eg	fg	fg	ee	ef	fg	ef	fg	eg	ee	eg	ee	ef	ef	ef	ee	--	fg	ef	ef	eg	ef	eg	fg	ef
55	782	8761	<lmxll>		15	50.584	0.041	RACA20	AGGGACAAAATTGATTATAGGAGCATTTTAACTTCAGGAAGAGACAAGGGC	12	G	T	lm	ll	lm	ll	lm	lm	ll	lm	ll	ll	ll	lm	lm	ll	ll	lm	ll	ll	ll	ll	lm	lm	lm	lm	ll	ll	ll	lm	lm	ll	ll	ll	lm	ll	lm	ll	ll
56	766	8630	<lmxll>		15	50.658	0.074	RACA20	CTTTTACAAGGGTGACTGGGCCAAGAGGTCAATATTCAAACTCCTCCACCT	44	T	A	lm	ll	lm	ll	lm	lm	ll	lm	ll	ll	ll	lm	lm	ll	ll	lm	ll	ll	ll	ll	lm	lm	lm	lm	ll	ll	ll	lm	lm	ll	ll	ll	lm	ll	lm	ll	ll
57	767	8636	<lmxll>		15	50.749	0.091	RACA20	AACAAGTTTCTCATTATTTTAGACTCAGATCAGCAGGATCTCGTTCTCCAG	37	A	G	lm	ll	--	ll	lm	lm	ll	lm	ll	ll	ll	lm	lm	ll	ll	lm	ll	ll	ll	ll	lm	lm	lm	lm	ll	ll	ll	lm	--	lm	ll	ll	lm	ll	lm	ll	--
58	771	8648	<efxeg>		15	50.984	0.235	RACA20	GAGGATTTGTTGGTTATTATAGGGCTAATCAACTAATCGATTAATTAATTT	27	A	T	ef	ee	fg	eg	ef	ef	eg	fg	ee	eg	ee	ef	fg	eg	eg	ef	ee	eg	ee	eg	--	ef	ef	ef	ee	ee	ee	fg	--	eg	ee	ee	fg	eg	fg	eg	ee
59	777	8719	<lmxll>		15	52.392	1.408	RACA20	GCTTTGTTCCTCATGGAGTCTTTAATCACCTGAAAGGGCATCACAGAGCAG	20	T	C	lm	ll	--	ll	lm	lm	ll	lm	ll	ll	ll	lm	lm	ll	ll	lm	ll	ll	ll	ll	lm	lm	lm	lm	ll	ll	--	lm	lm	ll	ll	ll	lm	ll	lm	ll	ll
60	769	8643	<lmxll>		15	53.263	0.871	RACA20	TGTTGGAAAGCAAAAACACCTTGTTCACAGTATACACGTCGAGATACTGCA	4	G	A	ll	lm	ll	lm	ll	ll	lm	ll	lm	lm	lm	ll	ll	lm	lm	ll	lm	lm	lm	lm	ll	ll	ll	ll	lm	lm	lm	ll	--	lm	lm	lm	ll	lm	ll	lm	lm
61	4272	52959	<hkxhk>		15	54.081	0.818	RACA24	AGCGAGGTCTACTGCAGGCTGAACAGCGGAGCTTCTTGGGTTTATAATGTG	35	T	A	kk	hk	hk	hk	kk	kk	hk	hk	hk	hh	hk	kk	hk	hh	hh	kk	hh	hh	hk	hh	hk	kk	hk	kk	hk	hk	hk	hk	kk	hh	hk	hk	hk	hk	hk	hh	hk
62	775	8715	<lmxll>		15	54.394	0.313	RACA20	GCAGGATCTAGATTGGACTGTCATCTCAAAGACACTTTACCTTAACTGGAC	37	T	C	ll	lm	ll	lm	ll	ll	lm	ll	lm	lm	lm	ll	ll	lm	lm	ll	lm	lm	lm	lm	ll	ll	ll	ll	lm	lm	lm	ll	ll	lm	lm	ll	ll	lm	ll	lm	lm
63	637	7238	<hkxhk>		15	55.688	1.294	RACA20	TTGTAGCTTTCATGTTCATCTTTGGTAGAGTGGCTTCATCTTGGAGATTGA	30	T	G	kk	hk	hk	hk	kk	kk	hk	hk	hk	hh	hk	kk	hk	hh	hh	kk	hh	hh	hk	hh	hk	kk	hk	kk	hh	hk	hk	hk	kk	hh	hk	hk	hk	hk	hk	hh	hk
64	755	8500	<lmxll>		15	56.563	0.875	RACA20	GCGATGATAAATTCTCTTAATGGAAACACTGAAGAAAAGTTTTTGTGCTTG	17	T	C	ll	lm	ll	lm	ll	ll	lm	ll	lm	lm	lm	ll	ll	lm	lm	ll	lm	lm	lm	lm	ll	ll	ll	ll	lm	lm	lm	ll	ll	lm	ll	ll	ll	lm	ll	lm	lm
65	670	7586	<hkxhk>		15	56.71	0.147	RACA20	CAGGTCCCAGGAGGAACCTTTTTATAGTTAAACAGGAACCAGCCCTCCCTT	16	C	T	kk	hk	hk	hk	kk	kk	hk	hk	hk	hh	hk	kk	hk	hh	hh	kk	hh	hh	hk	hh	hk	kk	hk	kk	hh	hk	hk	hk	kk	hh	hk	hk	hk	hk	hk	hh	hk
66	786	8775	<lmxll>		15	57.49	0.78	RACA20	ATTGTATAACAGGAAAAGTTTCAGTCTGAAGCTTTGGGAAGTTCTTTTTTT	37	G	A	lm	ll	lm	ll	lm	lm	ll	lm	ll	ll	ll	lm	lm	ll	ll	lm	ll	ll	ll	ll	lm	lm	lm	lm	ll	ll	ll	lm	lm	ll	ll	ll	lm	ll	lm	ll	ll
67	3800	46413	<nnxnp>		15	60.129	2.639	RACA19	AAGGCTGCATTGTTTTGGGAAATGCATGGTGGAGTTAGATACTTTCATCTC	4	C	T	nn	--	np	nn	nn	nn	nn	np	nn	np	np	nn	np	np	np	nn	np	np	nn	np	nn	nn	np	nn	np	nn	nn	np	nn	np	nn	nn	np	nn	np	np	nn
68	5096	64158	<nnxnp>		15	61.405	1.276	sc00158	GCAGAGGGAGAATGAAAGCCTTTGCAAGGAGAATAATGTCCTGAAAGAGAA	36	T	A	nn	nn	np	nn	nn	nn	nn	np	nn	np	np	nn	np	np	np	nn	np	np	nn	np	nn	nn	np	nn	np	nn	nn	np	nn	np	nn	nn	np	nn	np	np	nn
69	3795	46375	<lmxll>		15	62.899	1.494	RACA19	GTCCTGAGGGCTCCTAACAGTTGGAGATGCTCAAACATTTCCTAAAAGATA	9	G	C	--	lm	--	lm	ll	ll	lm	ll	lm	lm	lm	ll	ll	lm	lm	ll	lm	lm	lm	lm	ll	ll	ll	ll	lm	lm	ll	ll	--	lm	ll	ll	ll	lm	ll	lm	lm
70	3794	46350	<efxeg>		15	63.619	0.72	RACA19	TTCTTCAAATTGAAAGTTAGTCTGACAAAATTACATAACTCATGATTCTGC	31	T	A	ee	ef	eg	ef	ee	ee	ef	eg	ef	fg	fg	ee	eg	fg	fg	ee	fg	fg	ef	fg	ee	ee	--	ee	fg	ef	ee	--	ee	fg	ee	ee	eg	ef	eg	fg	ef
71	3796	46378	<hkxhk>		15	67.342	3.723	RACA19	GAGCCGGGAGTGGGCTTGGCATGTTTTAGGGGTCAGGCCTAAGGCCAGCTT	20	A	G	kk	hk	hk	hk	kk	kk	hk	hk	hk	--	hh	kk	hk	hh	hh	kk	hh	hh	hk	hh	kk	kk	hk	kk	hh	hk	kk	hk	kk	hh	kk	kk	hk	hk	hk	hh	hk
72	2228	27357	<nnxnp>		15	69.002	1.66	RACA10	GTGCATCTTTTTTTGTTCTTTTGTTCTTCCACATTAACAGTCTATAGACAA	46	A	G	nn	nn	np	nn	nn	nn	nn	np	nn	np	np	nn	np	np	np	nn	np	np	nn	np	nn	nn	np	nn	np	nn	nn	np	nn	np	nn	nn	np	nn	np	np	nn
73	2227	27356	<nnxnp>		15	69.176	0.174	RACA10	TCTAAGATACAAGCAGCCAATGGGAATGATGAACGGTCTGCTAACAACTAG	34	A	G	nn	nn	np	nn	--	--	--	np	nn	np	np	nn	np	np	np	nn	np	np	nn	np	nn	nn	np	nn	np	nn	--	np	nn	np	nn	nn	np	nn	np	np	nn
74	3792	46250	<hkxhk>		15	71.657	2.481	RACA19	AACTGTTATTATTCAGAAGAAAGTTTAGTCCAGAGATGGAAACTGAAACAC	6	T	A	kk	hk	hk	hk	kk	kk	hk	hk	hk	hh	hh	kk	hk	hh	hh	kk	hh	hh	hk	hh	kk	kk	hk	kk	hh	hk	kk	hk	kk	hh	kk	kk	hk	hk	hk	hh	hk
1	1477	17604	<lmxll>		16	0		RACA27	CTTTTAGAGCTAATCTTTCTCAGATTTGTCTCATCCTTTTCTCCTTAATCC	25	T	G	lm	lm	--	ll	lm	lm	--	lm	lm	lm	lm	lm	lm	lm	lm	lm	lm	lm	lm	lm	lm	lm	ll	lm	ll	lm	ll	ll	ll	lm	lm	lm	--	lm	ll	lm	lm
2	1491	17796	<nnxnp>		16	6.973	6.973	RACA27	CAGCAGCAAGAGAGAAAGAGCATGCACTGTTCACTCGATTTCCACTGTTCA	31	C	T	--	nn	--	np	np	np	np	nn	np	np	nn	nn	nn	np	np	nn	nn	np	nn	np	np	np	nn	np	np	nn	nn	np	--	nn	np	nn	nn	nn	np	np	np
3	1485	17664	<nnxnp>		16	7.119	0.146	RACA27	TGTATGAAATAAACTCACCTTGTTTATTAAACTTTTACTTAATCGTACTTC	7	C	A	nn	nn	--	np	np	np	np	nn	np	np	nn	nn	nn	np	np	nn	nn	np	nn	np	np	np	nn	np	np	nn	nn	--	--	nn	np	nn	nn	nn	np	np	np
4	1494	17802	<nnxnp>		16	8.808	1.689	RACA27	TAACGCCGCGCGGTGTGGAGCTGCAGGTGGGAAACAAGCTGATTGGTTGAT	10	T	C	nn	nn	--	np	np	np	np	nn	np	np	nn	--	nn	np	np	--	nn	nn	nn	np	np	np	nn	np	np	nn	nn	np	nn	nn	np	nn	nn	nn	np	np	np
5	1481	17624	<lmxll>		16	9.038	0.23	RACA27	GGTGAAAACAAACACAGCGACGTGCTTGCTGGTGCCTCTGTAGAGTTCTCC	20	C	T	lm	lm	lm	ll	lm	lm	ll	lm	lm	lm	lm	lm	lm	lm	lm	lm	lm	lm	lm	lm	lm	lm	ll	ll	ll	ll	ll	ll	ll	lm	ll	ll	--	lm	ll	ll	ll
6	5090	63956	<nnxnp>		16	9.876	0.838	sc00152	TGGAGGAATACTTTTACTCAAATCTAAGGTTCGATAAGCAATTCATTTTGT	31	C	T	nn	nn	nn	np	np	np	np	nn	np	np	nn	nn	nn	np	np	nn	nn	np	nn	np	np	np	nn	np	np	nn	nn	np	nn	nn	np	nn	nn	nn	np	np	np
7	5271	66725	<nnxnp>		16	10.127	0.251	sc00239	ACGTCTCATCCCCGTCGTGGAAAGCTAGCATTAGCGTTAGCATCAATTAGA	23	G	A	nn	nn	nn	np	np	np	np	nn	np	np	nn	nn	nn	np	np	nn	nn	np	nn	np	np	np	nn	np	np	nn	nn	np	nn	--	np	nn	nn	nn	np	np	np
8	5224	65834	<nnxnp>		16	10.151	0.024	sc00206	CAGAGATTCAGTGTTCCTTCAGTAAAGCATTGTCACCATCGAACAGCGCCC	15	G	C	nn	nn	nn	np	np	np	np	nn	np	np	nn	nn	nn	np	np	nn	nn	np	nn	np	np	np	nn	np	np	nn	nn	np	nn	nn	np	nn	nn	nn	np	np	np
9	1492	17797	<nnxnp>		16	10.404	0.253	RACA27	CATCTTCAATTTTGCTTTGCTATGGGTATGCAGTATTTCTAAATTAGAACC	3	C	T	nn	nn	nn	np	np	np	np	nn	np	np	nn	nn	nn	np	np	nn	nn	np	nn	np	np	np	nn	np	np	nn	nn	np	nn	nn	np	nn	nn	nn	np	np	np
10	1437	17164	<lmxll>	1437	16	10.923	0.519	RACA27	GTTACAAGGCAGTAGTTTTATTGTTCATTTGCAGAGGCCACGGGGACTGAC	13	A	G	lm	lm	lm	ll	lm	lm	ll	lm	lm	lm	lm	lm	lm	lm	lm	lm	lm	lm	lm	lm	lm	lm	ll	ll	ll	ll	ll	ll	ll	lm	ll	ll	ll	lm	ll	ll	ll
11	1443	17198	<lmxll>	1437	16	10.923	0	RACA27	CTTTCAGAATAATCTAGTGATACATTCTGTTAAAAATACAAGAATAATAGT	16	G	A	lm	lm	lm	ll	lm	lm	ll	lm	lm	lm	lm	lm	lm	lm	lm	lm	lm	lm	lm	lm	lm	lm	ll	ll	ll	ll	ll	ll	ll	lm	ll	ll	ll	lm	ll	ll	ll
12	1440	17179	<lmxll>		16	11.272	0.349	RACA27	GTTAAATGGCATCACTGGCTCTGGGAGGAGAACAACTTCATTGATTTCACT	3	A	T	lm	lm	lm	ll	lm	lm	ll	lm	lm	lm	lm	lm	lm	lm	lm	lm	lm	lm	lm	lm	lm	lm	ll	ll	ll	ll	ll	ll	--	lm	ll	ll	ll	lm	ll	ll	ll
13	1459	17384	<lmxll>		16	11.926	0.654	RACA27	ACTCAGTAATTGTCAGCAGTTATGAGGGCAGGTAAAAATAAAAAGAGCAGA	7	A	C	lm	lm	lm	ll	lm	lm	ll	lm	lm	lm	lm	lm	lm	lm	lm	lm	lm	lm	lm	lm	lm	lm	ll	ll	ll	ll	ll	ll	--	lm	ll	ll	ll	lm	ll	ll	ll
14	1441	17182	<lmxll>		16	12.109	0.183	RACA27	ATATATTTATATTTGTTGATGTAGAGCTTGTAAACATGCAATGTGACATCA	46	C	A	lm	lm	lm	ll	lm	lm	ll	lm	lm	lm	lm	lm	lm	lm	lm	lm	lm	lm	lm	lm	lm	lm	ll	ll	ll	ll	ll	ll	ll	lm	ll	ll	ll	lm	ll	ll	ll
15	5273	66750	<nnxnp>		16	13.642	1.533	sc00239	TCATCATCAGAATGTCAGGAACTGAAGAGGAAGAGTGAAGATTCTGACCAG	15	G	C	nn	nn	nn	np	np	np	np	nn	np	np	nn	nn	nn	np	np	nn	nn	np	nn	np	np	np	nn	np	np	nn	nn	np	nn	nn	np	nn	nn	nn	np	np	np
16	1445	17207	<lmxll>		16	14.158	0.516	RACA27	TGACATCATGTAATAATGGGCTGTGACAAGTTAAGTCAAAGTGTCTGTGAG	18	G	A	lm	lm	lm	ll	lm	lm	ll	lm	lm	lm	lm	lm	lm	lm	lm	lm	lm	lm	lm	lm	lm	lm	ll	ll	ll	ll	ll	ll	ll	lm	ll	ll	ll	lm	ll	ll	ll
17	1488	17688	<hkxhk>		16	14.697	0.539	RACA27	CTCAGTCGGAATATGATCCGCTCTCCGAGCCAAATAACCGGACCAAAATGG	23	T	C	hk	hk	hk	hk	hh	hh	hk	hk	hh	hh	hk	hk	hk	hh	hh	hk	hk	hh	hk	hh	hh	hh	kk	hk	hk	kk	kk	hk	kk	hk	hk	kk	kk	hk	hk	hk	hk
18	1462	17420	<nnxnp>		16	15.623	0.926	RACA27	TTTTAGGATTTCTTGTTAAGCAAAAATTACTTCTACAAATCAATTTTATCT	5	T	G	nn	nn	nn	np	np	np	np	nn	np	np	nn	nn	nn	np	np	nn	nn	np	nn	np	np	np	nn	np	np	nn	nn	np	nn	nn	np	nn	nn	nn	np	np	np
19	1458	17378	<nnxnp>		16	15.626	0.003	RACA27	GTCACGATGCCATAAGACTCATTAAAGCCATAAAAATAATGCTGCAGGTCA	44	G	C	nn	nn	--	np	np	np	np	nn	np	np	nn	nn	nn	np	np	nn	nn	np	nn	np	np	np	nn	np	np	nn	nn	np	nn	nn	np	nn	nn	nn	np	np	np
20	1463	17423	<nnxnp>		16	15.913	0.287	RACA27	GGTAATGAGGTGAGGAGAGTTCCCCCTCAATCCATCCATTCACAGCCGGCT	24	T	C	nn	nn	nn	np	np	np	np	nn	np	np	nn	nn	nn	np	np	nn	nn	np	nn	np	np	np	nn	np	np	nn	nn	np	nn	nn	np	nn	nn	nn	np	np	np
21	1466	17443	<nnxnp>		16	15.919	0.006	RACA27	TTTCTTGGTTTTATGTTTCAACTGATCTTATTTTGAAATTTCAGCAGACGG	6	G	A	nn	nn	--	np	np	np	np	nn	np	np	nn	nn	nn	np	np	nn	nn	np	nn	np	np	np	nn	np	np	nn	nn	np	nn	nn	np	nn	nn	nn	np	np	np
22	1475	17571	<hkxhk>		16	16.105	0.186	RACA27	AGGAATTGTAACAAGGAAGGACTAAACAATGGGAGGAGGGAAAGTATCAAA	42	A	C	hk	hk	hk	hk	kk	kk	hk	hk	kk	kk	hk	hk	hk	kk	kk	hk	hk	kk	hk	kk	kk	kk	hh	hk	hk	hh	hh	hk	hh	hk	hk	hh	hh	hk	hk	hk	hk
23	1482	17647	<lmxll>		16	16.44	0.335	RACA27	TCTGTCAGCGCGCATAAGCTGCAGGTCCTCAGCACACACAGTTCTGTGTCA	41	T	C	lm	lm	lm	ll	lm	lm	ll	lm	lm	lm	lm	lm	lm	lm	lm	lm	lm	lm	lm	lm	lm	lm	ll	ll	ll	ll	ll	ll	ll	lm	ll	ll	ll	lm	ll	ll	ll
24	1480	17617	<hkxhk>		16	16.629	0.189	RACA27	CTCAGGTGTCCATCTCCACTTACTTCTCTGTGAAACAGCATCATGATACCA	23	T	C	hk	hk	--	hk	hh	hh	hk	hk	hh	hh	hk	hk	hk	hh	hh	hk	hk	hh	hk	hh	hh	hh	--	hk	hk	kk	kk	hk	--	hk	hk	kk	kk	hk	hk	hk	hk
25	1473	17558	<lmxll>		16	16.699	0.07	RACA27	CAACTACAGAGGGAGACTGGGTGCTCCCTTAGAGATAGGGTGAGAAGCTCG	14	G	T	lm	lm	lm	ll	lm	lm	ll	lm	--	lm	lm	lm	lm	lm	lm	lm	lm	lm	lm	lm	lm	lm	ll	ll	ll	ll	ll	ll	ll	lm	ll	ll	ll	lm	ll	ll	ll
26	5027	63076	<nnxnp>		16	17.097	0.398	RACA33	AATGCAAGGCAAACACTAGTCAGGGAACATCAAGGGAGGTCATGTTCTGGT	28	A	G	nn	nn	--	np	np	np	np	nn	np	np	nn	nn	nn	np	np	nn	nn	np	nn	np	np	np	nn	np	np	nn	nn	np	--	nn	np	nn	nn	nn	np	np	np
27	1490	17731	<lmxll>		16	17.731	0.634	RACA27	TTATAACCACTATGCACACACATAAATGTATTAGGTGTAAAAACAGACTAA	14	C	T	lm	lm	lm	ll	lm	lm	ll	lm	lm	lm	lm	lm	lm	lm	lm	lm	lm	lm	lm	lm	lm	lm	ll	ll	ll	ll	ll	ll	ll	lm	ll	ll	ll	lm	ll	ll	ll
28	1442	17190	<lmxll>		16	19.069	1.338	RACA27	TCCTTTTTTTGGAGCTCCAGATGATAAGACGTGGGTTTGGAGAGACTGGAA	32	G	T	lm	lm	--	ll	lm	lm	ll	lm	lm	lm	lm	lm	lm	lm	lm	lm	lm	lm	lm	lm	lm	lm	ll	ll	ll	ll	ll	ll	--	lm	ll	ll	ll	lm	ll	ll	ll
29	1450	17268	<efxeg>		16	20.298	1.229	RACA27	GTACAGTGTCAGAGTCTGAGTAACCCTTTGACGCTGCAGATGTTCTAAATG	28	T	C	--	fg	ef	eg	fg	fg	eg	ef	fg	fg	ef	fg	ef	fg	fg	ef	ef	fg	ef	fg	fg	fg	ee	eg	eg	ee	ee	eg	ee	ef	eg	ee	ee	ef	eg	eg	ee
30	1454	17304	<nnxnp>		16	20.397	0.099	RACA27	ATAAACACAGAACAGATGATTAATGTCATCCACAGGATTGTGCTCAGTTAA	39	G	C	nn	np	nn	np	np	np	np	nn	np	np	nn	np	nn	np	np	nn	nn	np	nn	np	np	np	nn	np	np	nn	nn	np	nn	nn	np	nn	nn	nn	np	np	np
31	1453	17286	<nnxnp>		16	20.703	0.306	RACA27	TCTTCTTGTCATCCAAGTCCTCCAACTCTCTCCTAAAGTTCAAAAACAAGC	27	T	C	nn	np	--	np	np	np	np	nn	np	np	nn	np	nn	np	np	nn	nn	np	nn	np	np	np	nn	np	np	nn	nn	np	--	nn	np	nn	--	nn	np	np	np
32	1447	17240	<nnxnp>		16	21.674	0.971	RACA27	CAGCCCCCCAAAGTGCAATGGGTCACAAAATGACTTTTTACACAAGAAAAT	45	G	A	nn	np	--	np	np	np	np	nn	np	np	nn	np	nn	np	np	nn	nn	np	nn	np	np	np	nn	np	np	nn	nn	np	nn	nn	np	nn	nn	nn	np	np	nn
33	1432	17040	<lmxll>		16	24.295	2.621	RACA27	GACACAGATTTTACAGGAGCAGAGGCCAAAAATAAATCCTCTAATTTTGGA	22	A	G	lm	lm	--	ll	lm	lm	lm	lm	lm	lm	lm	lm	lm	lm	lm	lm	lm	lm	lm	lm	lm	lm	ll	ll	ll	ll	ll	ll	ll	ll	ll	ll	ll	ll	ll	ll	ll
34	1430	17018	<lmxll>		16	24.35	0.055	RACA27	TAGAACAACTTTTTTATATGAGGCATTTTCCTTAGGAGCCAGCCGGAAGGT	19	G	T	lm	lm	lm	ll	lm	lm	lm	lm	lm	lm	lm	lm	lm	lm	lm	lm	lm	lm	lm	lm	lm	lm	ll	ll	ll	ll	ll	ll	ll	ll	ll	ll	ll	ll	ll	ll	ll
35	1404	16718	<nnxnp>		16	24.444	0.094	RACA27	CACCACAGATGAGACAGAAAAAGATGAATGCTAACGATTTTTTTTTTTTAT	40	T	A	np	nn	np	nn	nn	np	nn	np	nn	np	np	nn	np	nn	np	nn	np	np	nn	np	np	nn	np	np	np	np	np	np	np	--	np	--	np	np	np	nn	np
36	1434	17048	<lmxll>	1434	16	24.598	0.154	RACA27	GTTTCACAGCAATTAACATCTTACAAGAGCAAATAGGATTATAAAGCGCAT	47	G	A	lm	lm	lm	ll	lm	lm	lm	lm	lm	lm	lm	lm	lm	lm	lm	lm	lm	lm	lm	lm	lm	lm	ll	ll	ll	ll	ll	ll	ll	ll	ll	ll	ll	ll	ll	ll	ll
37	4397	54652	<lmxll>	1434	16	24.598	0	RACA17	AAACAAGAGCTATTACTGGTCCTTGTATACAATCTTTTTTCATGCCTCTCC	31	A	G	lm	lm	lm	ll	lm	lm	lm	lm	lm	lm	lm	lm	lm	lm	lm	lm	lm	lm	lm	lm	lm	lm	ll	ll	ll	ll	ll	ll	ll	ll	ll	ll	ll	ll	ll	ll	ll
38	1428	16993	<lmxll>		16	25.566	0.968	RACA27	GTGATTTTGGACTCGCCAGGGACATCTACAAAGACCCGGATTACGTTCGCA	16	C	A	lm	lm	lm	ll	--	lm	lm	lm	lm	lm	lm	lm	lm	lm	lm	lm	lm	lm	lm	lm	lm	lm	ll	ll	ll	ll	ll	ll	ll	ll	ll	ll	ll	ll	ll	ll	ll
39	1418	16866	<lmxll>		16	26.312	0.746	RACA27	GGACATCAGTTTTTAAATAATTCTTCCCATTTTTTTGCTTTGCTTTTGCTG	23	T	C	ll	ll	ll	lm	ll	ll	ll	ll	ll	lm	ll	ll	ll	ll	ll	ll	ll	ll	ll	ll	ll	ll	lm	lm	lm	lm	lm	lm	--	lm	lm	lm	lm	lm	lm	lm	lm
40	1427	16992	<lmxll>		16	27.978	1.666	RACA27	CAATCGTGGACAAAGAATCTTTACATACTTTTAGAGAAGAAAACATAATTT	46	A	C	lm	lm	lm	ll	lm	lm	lm	lm	lm	lm	lm	lm	lm	lm	lm	lm	lm	lm	lm	lm	lm	lm	ll	ll	ll	ll	ll	ll	ll	ll	ll	ll	ll	ll	ll	ll	ll
41	1426	16980	<lmxll>		16	28.085	0.107	RACA27	TCAAGTCTGATGGCCTCAAAGGTCTGTACCAAGGGTTCAATGTGTCAGTGC	31	A	G	lm	lm	--	ll	lm	lm	lm	lm	lm	lm	lm	lm	lm	lm	lm	lm	lm	lm	lm	lm	lm	lm	ll	ll	ll	ll	ll	ll	ll	ll	ll	ll	ll	ll	ll	ll	ll
42	1416	16858	<lmxll>		16	28.853	0.768	RACA27	AGTGGACCAAATGTGTTGGCTTTTTATTTCCATGTTTCATCTCTATCTCTA	8	A	G	lm	lm	lm	ll	lm	lm	lm	lm	lm	ll	lm	lm	lm	lm	lm	lm	lm	lm	lm	lm	lm	lm	ll	ll	ll	ll	ll	ll	ll	ll	ll	ll	ll	ll	ll	ll	ll
43	1422	16943	<lmxll>		16	29.172	0.319	RACA27	NNNAATAGATTTAGATGTATTTTTAGGAAGATGTCGTTTCCCCCGAATTCT	11	T	A	lm	lm	lm	ll	lm	lm	lm	lm	lm	ll	lm	lm	lm	lm	lm	lm	lm	lm	lm	lm	lm	lm	ll	ll	ll	ll	ll	ll	ll	ll	ll	ll	ll	ll	ll	ll	ll
44	1400	16660	<hkxhk>		16	29.537	0.365	RACA27	TTGGAAATTACGCAACTGATGATGGATTTGAGGTTTTTTGACGCACATTGT	9	A	G	hk	hh	hk	hk	hh	hk	hh	hk	hh	hk	hk	hh	hk	hh	hk	hh	hk	hk	hh	hk	hk	hk	kk	kk	kk	kk	kk	hk	kk	hk	hk	hk	kk	kk	hk	hk	kk
45	1415	16853	<lmxll>		16	31.352	1.815	RACA27	NAATTCCACTGAGTCTGTGTGGCAGAAACTGTAAATCTGGGCTCCTAGAGG	16	G	A	lm	lm	lm	ll	lm	lm	lm	lm	lm	ll	lm	lm	lm	lm	lm	lm	lm	lm	lm	lm	lm	lm	ll	ll	ll	ll	ll	ll	ll	ll	ll	ll	ll	ll	ll	ll	ll
46	1546	18471	<lmxll>		16	34.479	3.127	RACA27	TAAGGATGTGACGACTAGCTTTAGAAATCATACAGCAAAATGTTTGCAGCT	15	T	G	lm	lm	lm	ll	lm	ll	lm	lm	lm	ll	lm	lm	lm	lm	lm	lm	lm	lm	lm	lm	lm	ll	ll	ll	ll	ll	ll	lm	ll	ll	ll	ll	ll	ll	ll	ll	ll
47	1533	18313	<nnxnp>		16	35.436	0.957	RACA27	TGTTGTTTTCTTCTGTTTTGTTTTTTAAGGTTCGGAGTATGCTGCCACAGC	19	G	T	nn	np	--	np	np	np	np	nn	np	np	nn	np	nn	np	nn	np	nn	nn	np	nn	nn	np	nn	nn	nn	nn	np	np	nn	np	np	np	nn	np	np	np	nn
48	1394	16573	<lmxll>		16	35.87	0.434	RACA27	TGCTGGAGGCGTCATGTTTATTAAAGTTTGTGACAACCCACTCTGACTAGT	29	G	T	lm	lm	lm	ll	lm	ll	lm	lm	lm	ll	lm	lm	lm	lm	lm	lm	lm	lm	lm	lm	lm	ll	ll	ll	ll	ll	ll	ll	--	ll	ll	ll	ll	ll	ll	ll	ll
49	1530	18285	<hkxhk>		16	36.076	0.206	RACA27	CTTGTGTTGCCACTTGATGGCGCTGGTGCTGCGTTTTCCTTTTACTTTTTT	7	T	C	hk	hh	hk	hk	hh	hk	hh	hk	hh	hk	kk	hh	hk	hh	hk	hh	hk	hk	hh	hk	hk	hk	kk	kk	kk	kk	hk	hh	kk	hk	hk	hk	kk	hk	hk	hk	kk
50	1388	16522	<lmxll>		16	37.047	0.971	RACA27	AATGGATAGAAAAGAAGGGAAAACTTTAGGTCAATTTGAAGGATAAAATAC	4	G	T	lm	lm	lm	ll	lm	ll	lm	lm	lm	ll	lm	lm	lm	lm	lm	lm	lm	lm	lm	lm	lm	ll	ll	ll	ll	ll	ll	ll	ll	ll	ll	ll	ll	ll	ll	ll	ll
51	1544	18453	<lmxll>		16	38.473	1.426	RACA27	AACAGATTCTAACAGAATCCACTCTTTGTGGGTTCAAGAATCTTCTTCTGA	24	T	C	lm	lm	lm	ll	lm	ll	lm	lm	lm	ll	lm	lm	lm	lm	lm	lm	lm	lm	lm	lm	lm	ll	ll	ll	ll	ll	ll	lm	ll	ll	ll	ll	ll	ll	ll	ll	ll
52	1539	18400	<efxeg>		16	39.262	0.789	RACA27	GAACTTTTTTTACTCACTTGGCCCTGATCTTCTCTCCTCTTGCAACACTTT	5	T	A	ef	--	ee	eg	fg	eg	fg	ef	--	eg	ee	fg	ef	fg	ef	fg	ef	ef	fg	ef	ef	eg	ee	ee	ee	ee	eg	fg	--	eg	eg	eg	ee	eg	eg	eg	ee
53	1528	18271	<lmxll>		16	41.246	1.984	RACA27	CCCACTTAGAAATCATGGAGGAACCTGAGATTTTCCTCTTAGCTCCCTGTC	25	T	C	ll	ll	ll	lm	ll	lm	ll	ll	ll	lm	lm	ll	ll	ll	ll	ll	ll	ll	ll	ll	ll	lm	lm	lm	lm	lm	lm	ll	lm	lm	lm	--	lm	lm	lm	lm	lm
54	1529	18279	<lmxll>		16	41.25	0.004	RACA27	AGAGGAGCGCCTGGTGGAGAAGGAGCACGAGTTGAAGCAGATGAAAAGAAA	31	T	C	lm	lm	lm	ll	lm	ll	lm	lm	lm	ll	ll	lm	lm	lm	lm	lm	lm	lm	lm	lm	lm	ll	ll	ll	ll	ll	ll	lm	ll	ll	ll	ll	ll	ll	ll	ll	ll
55	1536	18372	<lmxll>		16	41.389	0.139	RACA27	TACCAAACAAACTGAATCTTGAGATGAGTCACTGTCAGCACTTCATCTTTT	32	T	C	lm	lm	lm	ll	lm	ll	lm	lm	lm	ll	ll	lm	lm	lm	lm	lm	lm	lm	lm	lm	lm	ll	ll	ll	ll	ll	--	lm	ll	ll	ll	ll	--	ll	ll	--	ll
56	1543	18441	<efxeg>		16	41.475	0.086	RACA27	TTTCATCTTTGTGTCCACCTGTTTCCTTTCTCCAGAAGTAGGCCCTCCATG	25	T	C	ef	fg	ef	eg	fg	eg	fg	ef	fg	eg	ef	fg	ef	fg	ef	--	ef	ef	fg	ef	ef	eg	ee	ee	ee	ee	eg	fg	ee	eg	eg	eg	ee	eg	eg	eg	ee
57	1540	18421	<hkxhk>		16	42.647	1.172	RACA27	CCACGCTCGCTATGGCTCACCAACATACTTCTACGCCTTTTACCATCACTG	39	T	C	hk	hh	hk	hk	hh	hk	hh	hk	hh	hk	hk	hh	hk	hh	hk	hh	hk	hk	hh	hk	hk	hk	kk	kk	kk	kk	hk	hh	--	hk	hk	hk	kk	hk	hk	hk	kk
58	1541	18427	<hkxhk>		16	43.147	0.5	RACA27	GTGAGCAAAGAGCATTTAAATTAGTTTAAAAAAAATGCTGCATATATTAAA	27	A	T	hk	kk	hk	hk	kk	hk	kk	hk	kk	hk	hk	kk	hk	kk	hk	kk	hk	hk	kk	hk	hk	hk	hh	hh	--	hh	hk	kk	hh	hk	hk	hk	hh	hk	hk	hk	hh
59	1525	18106	<lmxll>		16	44.315	1.168	RACA27	GCGGGAGGAGGGGGGGCTCTGAATACAGGTGAGTGTGCGCTGGTTTCATGT	40	T	C	lm	lm	--	ll	lm	ll	lm	lm	lm	ll	ll	lm	lm	lm	lm	lm	lm	lm	lm	lm	lm	ll	ll	--	ll	ll	ll	lm	--	ll	ll	ll	ll	ll	ll	ll	ll
60	1524	18101	<lmxll>		16	45.475	1.16	RACA27	AATAACCTGAGTCCTTCGGTGGATTGGCTGGACTCTGTGACCTCATTCTCG	13	C	G	lm	lm	lm	ll	lm	ll	lm	lm	lm	ll	ll	lm	lm	lm	lm	lm	lm	lm	lm	lm	lm	ll	ll	lm	ll	ll	ll	lm	ll	ll	ll	ll	ll	ll	ll	ll	ll
61	1522	18061	<lmxll>		16	46.309	0.834	RACA27	NAATTCCTCTGAACATCTTTGGGGTTTACGACAAGATTTGAGACAAAATGT	6	C	A	lm	--	lm	ll	lm	ll	lm	lm	lm	ll	ll	lm	lm	lm	lm	lm	lm	lm	lm	lm	lm	ll	ll	lm	ll	ll	ll	lm	ll	ll	ll	ll	ll	ll	ll	ll	ll
62	1516	17975	<lmxll>		16	47.592	1.283	RACA27	ATTCCTAAAAGCTTCACAAACTCGTTACTTTATTCTACCTTGAACCCAGAA	41	G	A	lm	lm	--	ll	lm	ll	lm	lm	lm	ll	ll	ll	lm	lm	lm	lm	lm	lm	lm	lm	lm	ll	ll	lm	ll	--	ll	lm	ll	ll	ll	ll	ll	ll	ll	ll	ll
63	1510	17909	<hkxhk>		16	49.806	2.214	RACA27	ATACAAAAAAAATGCAAATAAAAATAAAACAGATGTTCAGGAGCCAGAACA	35	T	G	hh	hk	hh	kk	hk	kk	hh	hk	hk	kk	hk	kk	hh	hh	hh	hk	hh	hh	hk	hh	hh	kk	hk	hh	hk	hk	hk	hk	hk	kk	kk	kk	hk	kk	hk	kk	hk
64	4093	50477	<nnxnp>		16	50.582	0.776	RACA26	TATTTATTAAAACCTTAAAAACCTTATCGTCTACTTTTAAGCAAACATTTA	29	C	T	np	nn	np	nn	np	nn	np	nn	nn	nn	np	nn	np	np	np	nn	np	np	nn	np	np	nn	np	np	np	np	nn	nn	np	nn	np	nn	np	nn	np	nn	np
65	4092	50476	<nnxnp>		16	50.585	0.003	RACA26	GATTCAGTTACAGCCAGTAACTTCAGAAAAGATGGTCTTTTGGGTCTTCTG	5	A	G	np	nn	np	nn	np	nn	np	nn	nn	nn	np	nn	np	np	np	nn	np	np	nn	np	np	nn	np	np	np	np	nn	nn	np	nn	np	nn	np	nn	np	nn	np
66	1509	17904	<lmxll>		16	51.597	1.012	RACA27	GAATTCACAATAAAACCGGAGAGTTTTGTGAGAAAATCCCACCGCTGTGAC	26	T	C	lm	lm	lm	ll	ll	ll	lm	lm	lm	ll	ll	ll	lm	lm	lm	lm	lm	lm	lm	lm	lm	ll	ll	lm	ll	ll	lm	lm	--	ll	ll	ll	ll	ll	ll	ll	ll
67	4115	50743	<nnxnp>		16	52.785	1.188	RACA26	CTTCTCCATCTCAGATTTTACTGAGTGACTCAGTGACTCAGACTCTCCCNN	29	T	G	nn	np	nn	np	nn	np	nn	np	np	np	nn	np	nn	nn	nn	np	nn	nn	np	nn	nn	np	nn	nn	nn	nn	np	np	nn	np	nn	np	nn	np	nn	np	nn
68	1498	17850	<lmxll>		16	53.782	0.997	RACA27	CAGAGTTGCTGTGGTGCTATCAAGGCCAGGATGAGTTTTGTGCAACATCAA	23	G	C	lm	lm	lm	ll	ll	ll	lm	lm	lm	ll	ll	ll	lm	lm	lm	lm	lm	lm	lm	lm	lm	ll	ll	lm	ll	ll	lm	lm	ll	ll	ll	ll	ll	ll	ll	ll	ll
69	4103	50604	<hkxhk>		16	54.719	0.937	RACA26	GGTCTGTTCAGGTTCAAACCTGCATTTGGAATCAGTTTATTTCTACAAAAA	38	A	G	kk	hk	kk	hh	hk	hh	kk	hk	hk	hh	hk	hh	kk	kk	hk	hk	kk	kk	hk	kk	kk	hh	kk	kk	hk	hk	hk	hk	hk	hh	hh	hh	hk	hh	hk	hh	kk
70	1519	18014	<lmxll>		16	55.199	0.48	RACA27	TCCAGAGACTCTCGTGGTGCAGTGTACGTCACTCTTCTACCGGGACCTGTG	13	G	C	ll	ll	--	lm	lm	lm	ll	ll	ll	lm	lm	lm	ll	ll	lm	ll	ll	ll	--	ll	ll	lm	lm	ll	lm	lm	ll	ll	lm	lm	lm	lm	lm	lm	lm	lm	ll
71	1474	17566	<nnxnp>		16	55.585	0.386	RACA27	GATATTTTTGACACAATGTGTGTGTTTGTGTGTGTGTTGTAAAGTGCACTG	7	G	T	nn	np	nn	np	nn	np	nn	np	np	np	nn	np	--	--	nn	np	nn	nn	np	nn	nn	np	nn	nn	nn	nn	np	np	nn	np	np	np	nn	np	nn	np	nn
72	1425	16960	<nnxnp>		16	55.61	0.025	RACA27	ATGAGCCAAGCTACATTTCAGCTTACATCAAGCGCAAAAGAATTTACATTT	33	G	A	nn	np	nn	np	nn	np	nn	np	np	np	nn	np	nn	nn	nn	np	nn	nn	np	nn	nn	np	--	nn	nn	--	np	np	nn	np	np	np	nn	np	--	np	nn
73	1521	18051	<lmxll>		16	55.757	0.147	RACA27	TAGACCAGTCAGTGAGACTGAAGAACAAAAGTATTCATGCATATTATTTTA	3	A	G	ll	ll	ll	lm	lm	lm	ll	ll	ll	lm	lm	lm	ll	ll	lm	ll	ll	ll	ll	ll	ll	lm	lm	ll	lm	lm	ll	ll	--	lm	lm	lm	lm	lm	lm	lm	ll
74	1410	16814	<efxeg>		16	56.643	0.886	RACA27	CCGTTTTGGTCTCACCTGACCAAAGCACCTCCTCAAAATTACTCTCTAAAT	19	C	T	ee	eg	ee	fg	ef	--	ee	eg	eg	--	ef	fg	ee	ee	ee	eg	ee	ee	eg	ee	ee	fg	ef	ee	ef	ef	eg	eg	ef	fg	fg	--	ef	fg	ef	fg	ee
75	1411	16816	<efxeg>		16	56.907	0.264	RACA27	GTCCTTGGAAGAACAGCTTTTACATTTCTTACATTAAAACACTTGCAACTA	21	A	C	ee	eg	ee	fg	ef	fg	ee	eg	eg	fg	ef	fg	ee	ee	ee	eg	ee	ee	eg	ee	ee	fg	ef	ee	ef	ef	eg	eg	ef	--	fg	fg	ef	fg	ef	fg	ee
76	4108	50656	<lmxll>		16	57.269	0.362	RACA26	GCTCCACATTTACTAAAACTCCCTGTCTCTGTGGAAATCGCCACGCCAAAT	21	C	T	ll	ll	--	lm	lm	lm	ll	ll	ll	lm	lm	lm	ll	ll	lm	ll	ll	ll	ll	ll	ll	lm	ll	ll	lm	lm	ll	ll	--	lm	lm	lm	lm	lm	lm	lm	ll
77	4105	50622	<hkxhk>		16	57.822	0.553	RACA26	CCTCCATGGAACACTCTGCATGTCGTTCCAAAAAGGTTAGAGTAGATATTC	46	T	C	hh	hk	hh	kk	hk	kk	hh	hk	hk	--	hk	kk	hh	hh	hk	hk	hh	hh	hk	hh	hh	kk	hh	hh	hk	hk	hk	hk	hk	kk	kk	kk	hk	kk	hk	kk	hh
78	1399	16658	<hkxhk>		16	57.852	0.03	RACA27	ACCAATATTCGGTTCAGTCATTCAAAAAAAATGGGGGAATCACTTGAACAT	20	T	G	kk	hk	kk	hh	hk	hh	kk	hk	hk	--	hk	hh	kk	kk	hk	hk	kk	kk	hk	kk	kk	hh	kk	kk	hk	hk	hk	hk	hk	hh	hh	hh	hk	hh	hk	hh	kk
79	4106	50623	<hkxhk>		16	57.883	0.031	RACA26	TAGGGCAAATAAGCAGAAAGGGAGCATCCCGATTATCCTTCTTCTAGTAGA	5	C	T	kk	hk	kk	hh	hk	hh	kk	hk	hk	hh	hk	hh	kk	kk	hk	hk	kk	kk	hk	kk	kk	hh	kk	kk	hk	hk	hk	hk	hk	hh	hh	hh	hk	hh	hk	hh	kk
80	1436	17145	<lmxll>		16	58.066	0.183	RACA27	NAATTCTGATTGTAAAGTTTAATTCTCCAAAATACAAATGTATTAACTTAT	40	T	C	ll	ll	--	lm	lm	lm	ll	ll	ll	lm	lm	--	ll	ll	ll	ll	ll	ll	ll	ll	ll	lm	lm	ll	lm	lm	ll	ll	lm	--	lm	lm	lm	lm	lm	lm	ll
81	5487	71052	<lmxll>		16	58.25	0.184	sc01100	CTGGTCAAATCTGGGATGTGAGTTAACCCAGACTTCCACCCCGATTGGACA	13	G	A	ll	ll	ll	lm	lm	lm	ll	ll	ll	--	lm	lm	ll	ll	ll	ll	ll	ll	ll	ll	ll	lm	lm	ll	lm	lm	ll	ll	lm	lm	lm	lm	lm	lm	lm	lm	ll
82	1392	16564	<hkxhk>		16	58.386	0.136	RACA27	NAATTCATAAATATGTATTCCTATCTGTCGGCTAAGATAGAAAATAATTTT	28	C	T	hh	hk	hh	kk	hk	kk	hh	hk	hk	kk	hk	kk	hh	hh	hh	hk	hh	hh	hk	hh	hh	kk	hk	hh	hk	hk	hk	hk	--	kk	kk	kk	hk	kk	hk	kk	hh
83	1391	16549	<hkxhk>		16	58.737	0.351	RACA27	TCCAAGTGACATCTAGTCCTTTATCTGATAACAGCAGTCATTTCTTAAAGA	44	T	A	kk	hk	kk	hh	hk	hh	kk	hk	hk	hh	hk	hh	kk	kk	kk	hk	kk	kk	hk	kk	kk	hh	hk	kk	hk	hk	hk	hk	hk	hh	hh	hh	hk	hh	hk	hh	kk
84	1548	18473	<hkxhk>		16	58.805	0.068	RACA27	ATCTCTACTGTTTACATTGTGGATTTTTTTTCCTGAAATAAATCAAGGTGA	14	C	T	kk	hk	kk	hh	hk	hh	kk	hk	hk	hh	hk	hh	kk	kk	kk	hk	kk	kk	hk	kk	kk	hh	hk	kk	hk	hk	hk	hk	--	hh	hh	hh	hk	hh	hk	hh	kk
85	1405	16730	<hkxhk>		16	58.836	0.031	RACA27	NAATTCCCATTATAACTGAAAGCCTTGGTCACAACTGTCCTCAGAAGTGGA	9	T	A	hh	hk	hh	kk	hk	kk	hh	hk	hk	kk	hk	kk	hh	hh	hh	hk	hh	hh	hk	hh	hh	kk	hk	hh	hk	hk	hk	hk	--	kk	kk	kk	hk	kk	hk	kk	hh
86	1532	18307	<nnxnp>		16	58.998	0.162	RACA27	TTTCCCACCTTGATTTCTTCTAATTTTTGAAATCTTTTCCAAAAGAGACTA	47	A	T	nn	np	--	np	nn	np	nn	np	np	np	nn	np	nn	nn	nn	np	nn	nn	np	nn	nn	np	nn	nn	nn	nn	np	np	nn	np	np	np	nn	np	nn	np	nn
87	1403	16709	<nnxnp>		16	59.03	0.032	RACA27	ATTTTTGATTTTGACTTGCCAGTTATGGACACGCAGTCGAATAATTTCCTG	26	G	A	nn	np	nn	np	nn	np	nn	np	np	np	nn	np	nn	nn	nn	np	nn	nn	np	nn	nn	np	nn	nn	nn	nn	np	np	nn	np	np	np	nn	np	nn	np	nn
88	1555	18540	<hkxhk>		16	59.125	0.095	RACA27	CCAACTCCCTCTGAAGTCTTTAAAAGACCATCCAGCTGGAGATGAGGCCCA	28	C	T	kk	hk	kk	hh	hk	hh	kk	hk	hk	hh	hk	hh	kk	kk	hk	hk	kk	kk	hk	kk	kk	hh	kk	kk	hk	hk	hk	hk	hk	hh	hh	hh	hk	hh	hk	hh	kk
89	1527	18141	<hkxhk>		16	59.125	0	RACA27	GTAAAATGAAGACTATTTTCTCTCGAGTCAAATATAATTTTCTAGACACCA	24	G	A	hh	hk	hh	kk	hk	kk	hh	hk	hk	kk	hk	kk	hh	hh	hk	hk	hh	hh	hk	hh	hh	kk	hh	hh	hk	hk	hk	hk	hk	kk	kk	kk	hk	kk	hk	kk	hh
90	4107	50639	<hkxhk>		16	59.143	0.018	RACA26	CACTTTGACATCAGTATTTAGTTTTTGACATATCACTGATAAAATACACGT	18	T	C	kk	hk	kk	hh	hk	hh	kk	hk	hk	hh	hk	hh	kk	kk	hk	hk	kk	kk	hk	kk	kk	hh	kk	kk	hk	hk	hk	hk	--	hh	hh	hh	hk	hh	hk	hh	kk
91	1408	16771	<nnxnp>		16	59.944	0.801	RACA27	ACCACCAATGTATAACTCATATATCACGTTAAAATTATGTAATTGATTCAC	28	C	T	nn	np	--	np	nn	np	nn	np	np	np	nn	np	nn	nn	nn	np	nn	nn	np	nn	nn	np	nn	nn	nn	--	np	np	nn	np	np	np	nn	np	nn	np	nn
92	1500	17860	<nnxnp>		16	60.7	0.756	RACA27	GTTTTTTTGAGTCTTTTATTCTGTAGCCTAGATATGGATGGGGGCCATTAG	24	T	A	nn	np	nn	np	nn	np	nn	np	np	np	nn	np	nn	nn	nn	np	nn	nn	np	nn	nn	np	nn	nn	nn	nn	np	np	nn	np	--	np	nn	np	nn	np	nn
93	4101	50559	<hkxhk>	4101	16	60.983	0.283	RACA26	CCTCCTCCTCTGTGGACCTGATCCATGTTGCCATGGTGCATCTTCATATCT	11	G	A	hh	hk	hh	kk	hk	kk	hh	hk	hk	kk	hk	kk	hh	hh	hk	hk	hh	hh	hk	hh	hh	kk	hh	hh	hk	hk	hk	hk	hk	kk	kk	kk	hk	kk	hk	kk	hh
94	4102	50582	<hkxhk>	4101	16	60.983	0	RACA26	GAACCAAAGAGCAGAAGAACGACAACAGGAGTCTGTTAGGAAGAAGATAGA	37	A	G	hh	hk	hh	kk	hk	kk	hh	hk	hk	kk	hk	kk	hh	hh	hk	hk	hh	hh	hk	hh	hh	kk	hh	hh	hk	hk	hk	hk	hk	kk	kk	kk	hk	kk	hk	kk	hh
95	1431	17026	<lmxll>		16	61.282	0.299	RACA27	GTCGCAGTGTTTAATAAATCACATTTTTTTTTGCCCGTCTTTGAACTTCAC	8	G	A	lm	lm	lm	ll	ll	ll	lm	lm	lm	ll	ll	ll	lm	lm	lm	lm	lm	lm	lm	lm	lm	ll	ll	lm	ll	ll	lm	lm	ll	ll	ll	ll	ll	ll	ll	ll	lm
96	4089	50444	<nnxnp>		16	61.443	0.161	RACA26	AAAGCTTCAAATGTGAAGTCGTTGCTTTCATCACTTCTGTTTGTAAAAAGA	32	G	A	nn	np	nn	np	nn	np	--	np	np	np	nn	np	nn	nn	nn	np	nn	nn	np	nn	nn	np	nn	nn	nn	nn	np	np	nn	np	nn	np	nn	np	nn	np	nn
97	4079	50372	<nnxnp>	4079	16	61.46	0.017	RACA26	GTCTCTGCAAACCAACGATGAAGAACTTCAGAAGTTCCACCATAACATCTC	15	A	C	nn	np	nn	np	nn	np	nn	np	np	np	nn	np	nn	nn	nn	np	nn	nn	np	nn	nn	np	nn	nn	nn	nn	np	np	nn	np	nn	np	nn	np	nn	np	nn
98	4088	50435	<nnxnp>	4079	16	61.46	0	RACA26	ATAGTTGCAAATGACTTTTTTTACCCAAATAGTTGTGAATATGCTGAGTAA	7	C	T	nn	np	nn	np	nn	np	nn	np	np	np	nn	np	nn	nn	nn	np	nn	nn	np	nn	nn	np	nn	nn	nn	nn	np	np	nn	np	nn	np	nn	np	nn	np	nn
99	4076	50362	<nnxnp>		16	61.837	0.377	RACA26	GCATGAACTGTGGGGTCATCACCGCGGCGGTGTTTCTGTGGAACCGCCGCT	30	C	T	nn	np	nn	np	nn	np	nn	np	np	np	nn	np	nn	nn	nn	np	nn	nn	np	nn	nn	np	nn	nn	nn	nn	np	np	nn	np	nn	np	nn	np	nn	np	nn
100	1495	17830	<lmxll>		16	61.978	0.141	RACA27	GGAAGTATCCACTCCACTTTCACTTGCGGGTCAGAGGTAATAACACTACAC	5	T	A	lm	lm	lm	ll	ll	--	lm	lm	lm	ll	ll	ll	lm	lm	lm	lm	lm	lm	lm	lm	lm	ll	ll	lm	ll	ll	lm	lm	ll	ll	ll	ll	ll	ll	ll	ll	lm
101	1506	17873	<hkxhk>		16	62.209	0.231	RACA27	AACCCAGTAAAGGTGTGAAACTTTTCTGCAGTTCCTGGTGAAAACCATGTC	45	C	T	hh	hk	hh	kk	hk	kk	hh	hk	hk	kk	hk	kk	hh	hh	hh	hk	hh	hh	hk	hh	hh	kk	hk	hh	hk	hk	hk	hk	hk	kk	kk	kk	hk	kk	hk	kk	hk
102	1511	17910	<hkxhk>		16	62.213	0.004	RACA27	TTAGCTTTGAAGCTACAAAGAGATTCTGCATAAGCTTTCGATAGCAGCCGG	31	A	T	kk	hk	kk	hh	hk	hh	kk	hk	hk	hh	hk	hh	kk	kk	kk	hk	kk	kk	hk	kk	kk	hh	hk	--	hk	hk	hk	hk	hk	hh	hh	hh	hk	hh	hk	hh	hk
103	4116	50744	<nnxnp>		16	62.587	0.374	RACA26	TTGACTTCTAATAAACAGAAACATTTTGTATTTTATATTTTTAAATTTAAC	18	G	A	nn	np	nn	np	nn	np	nn	np	np	np	nn	np	nn	nn	nn	np	nn	nn	np	nn	nn	np	nn	nn	nn	nn	np	np	nn	np	nn	np	nn	np	--	np	nn
104	4077	50366	<nnxnp>		16	62.728	0.141	RACA26	GTATAGGGTCAACACCTACAATTGTAAACAACTGGCTAAAGTATGTTGAAA	16	G	T	nn	np	nn	np	nn	np	nn	np	np	np	nn	np	nn	nn	nn	np	nn	nn	np	nn	nn	np	nn	nn	--	nn	np	np	nn	np	nn	np	nn	np	nn	np	nn
105	4098	50516	<nnxnp>	4098	16	62.745	0.017	RACA26	ATCGTTCTGTAATCCTGGGATTATTTTACTCTGAAGGCTTGAGGGAAAAGT	25	T	C	nn	np	nn	np	nn	np	nn	np	np	np	nn	np	nn	nn	nn	np	nn	nn	np	nn	nn	np	nn	nn	nn	nn	np	np	nn	np	nn	np	nn	np	nn	np	nn
106	4110	50699	<nnxnp>	4098	16	62.745	0	RACA26	CTGTGGTTTAAGGTCAGCAGGGATCGTATCGTGAGGTCTCCAGGTACTAAG	44	T	C	nn	np	nn	np	nn	np	nn	np	np	np	nn	np	nn	nn	nn	np	nn	nn	np	nn	nn	np	nn	nn	nn	nn	np	np	nn	np	nn	np	nn	np	nn	np	nn
107	4119	50788	<nnxnp>	4098	16	62.745	0	RACA26	TTAGTCACATGGTTTTGTTTACAACTTTAGTTTAGAACAGGAAAGTCTGCT	14	T	C	nn	np	nn	np	nn	np	nn	np	np	np	nn	np	nn	nn	nn	np	nn	nn	np	nn	nn	np	nn	nn	nn	nn	np	np	nn	np	nn	np	nn	np	nn	np	nn
108	4118	50759	<nnxnp>		16	62.826	0.081	RACA26	TTTCTTCCTAAGTGGTTCCTCCAGCGTTCATCCGACCACACAGTCGGATTA	6	T	C	nn	np	nn	np	nn	np	nn	np	np	np	nn	np	nn	nn	nn	np	nn	nn	np	nn	nn	np	nn	nn	nn	--	np	np	nn	np	nn	np	nn	np	nn	np	nn
109	1508	17899	<hkxhk>		16	62.889	0.063	RACA27	AAATCAAACTGATCTCAAAACTTCAGCATAAAGATTTATGATGAGTAAAAC	42	G	A	kk	hk	kk	hh	hk	hh	kk	hk	hk	hh	hk	hh	kk	kk	kk	hk	kk	kk	hk	kk	kk	--	hk	--	hk	hk	hk	hk	hk	hh	hh	hh	hk	hh	hk	hh	hk
110	1496	17838	<lmxll>		16	62.993	0.104	RACA27	TCCCTTAAAGGAAGAAGAAAAAACAGAGAGAAAACAATCGTGAAGCTCCAC	28	A	T	lm	lm	--	ll	ll	ll	lm	lm	lm	ll	ll	ll	lm	lm	lm	lm	lm	lm	lm	lm	lm	ll	ll	lm	ll	ll	lm	lm	ll	ll	ll	ll	ll	ll	ll	ll	lm
111	1503	17864	<lmxll>		16	63.157	0.164	RACA27	CTGCGCCAAGGAAGAGGAGGGGATTCGCTCTGCTGCTGCGCCACGAATTCC	25	C	T	lm	lm	--	ll	ll	ll	lm	lm	lm	--	ll	ll	lm	lm	lm	lm	lm	lm	lm	lm	lm	ll	ll	lm	ll	ll	lm	--	ll	ll	ll	ll	ll	ll	ll	ll	ll
112	1507	17898	<hkxhk>		16	63.621	0.464	RACA27	CCATCCCACGCGCAGCGACTTGGGACGAACAAAGCTGATTTTTTACATTAT	14	G	A	kk	hk	--	hh	hk	hh	kk	hk	hk	hh	hk	hh	kk	--	kk	hk	kk	kk	hk	kk	kk	hh	hk	kk	hk	hk	hk	hk	hk	hh	hh	hh	hk	hh	hk	hh	hk
113	1513	17922	<nnxnp>		16	64.562	0.941	RACA27	GTAAATACAGGAAGTGTGAGGAGCTGAAGAGGAAGCCCGGGGGGCCGGGGT	16	T	C	np	nn	np	nn	np	nn	np	nn	nn	nn	np	nn	np	np	np	nn	np	np	nn	np	np	nn	np	np	np	np	nn	nn	np	nn	nn	nn	np	nn	np	nn	np
114	1502	17863	<efxeg>		16	64.761	0.199	RACA27	CTTAAATGCACATAAAAGCGTAAGCGCACACACACCACCCAGCACGTCAGG	22	A	C	fg	ef	fg	ee	eg	ee	fg	ef	ef	ee	eg	ee	fg	--	fg	ef	fg	fg	ef	fg	fg	ee	eg	fg	eg	eg	ef	ef	eg	ee	ee	ee	eg	ee	eg	ee	eg
115	4090	50449	<nnxnp>		16	65.58	0.819	RACA26	CTCAAGAAGAAATCCCAATTCAACATTTTTTGAGAGTAAAAGAAGAAATTA	17	A	G	np	nn	np	nn	np	nn	np	nn	nn	nn	np	nn	np	np	np	nn	np	np	nn	np	np	nn	np	np	np	np	nn	nn	np	nn	np	nn	np	nn	np	nn	np
116	4085	50403	<nnxnp>		16	66.822	1.242	RACA26	GCAGAGCCGGGAGGGTGGAGAAGTCAAAGATTCATTGACTTTTTCACTTCT	15	T	C	np	nn	np	nn	np	nn	np	nn	nn	nn	np	nn	np	np	np	nn	np	np	nn	np	np	nn	np	np	np	np	np	nn	np	nn	np	nn	np	nn	np	nn	np
117	4096	50510	<nnxnp>		16	68.297	1.475	RACA26	NAATTCCAAAATGACATTGATAAAGATGAGGATGTGCTTTTCATTCCCAAA	27	A	G	nn	np	nn	np	nn	np	nn	np	np	np	nn	np	nn	--	nn	np	nn	nn	np	nn	nn	np	nn	nn	nn	nn	np	nn	nn	np	nn	np	nn	np	nn	np	nn
1	505	5594	<lmxll>		17	0		RACA29	AAAACCCAAATCATCTCTTTCTTTGCTTCACCGGGAATGGACCTAAATTTT	32	G	A	lm	ll	ll	ll	ll	ll	lm	ll	ll	lm	lm	ll	ll	lm	ll	ll	ll	ll	ll	lm	lm	lm	ll	lm	lm	ll	ll	ll	--	ll	ll	lm	lm	lm	lm	ll	ll
2	506	5599	<lmxll>		17	0.18	0.18	RACA29	CCAGGTTGGAGGTGTGGAGGATGCAGGAGGTTAATGGTTATTAATGCGGGC	7	G	T	lm	ll	ll	ll	ll	ll	lm	ll	ll	lm	lm	ll	ll	lm	ll	ll	ll	ll	ll	lm	lm	lm	ll	lm	lm	ll	ll	ll	lm	ll	ll	lm	lm	lm	lm	ll	ll
3	428	4770	<nnxnp>		17	1.652	1.472	RACA29	CACATTACCAGTTTTGAAAACTGGATTGCTTCTTTCCTTATCCTTTTCTCT	8	C	T	nn	nn	np	np	np	np	nn	nn	np	nn	nn	nn	np	nn	np	nn	nn	nn	nn	nn	np	np	np	np	np	nn	nn	nn	nn	nn	nn	nn	nn	nn	np	nn	np
4	519	5735	<lmxll>		17	3.529	1.877	RACA29	NAATTCTGTTTTCCTGTCGGTTTGAATAAATACTTTGCATTAAATGAAGTG	26	T	C	ll	lm	--	lm	lm	lm	ll	lm	lm	ll	ll	lm	lm	ll	lm	lm	lm	lm	lm	ll	ll	ll	lm	ll	ll	lm	lm	lm	--	lm	lm	ll	ll	ll	lm	lm	lm
5	517	5726	<lmxll>	517	17	3.999	0.47	RACA29	TTAAATGCCAAATAATAAACGTGTCAATTGTACTTTAAGTCAGTTAGAATA	20	G	A	ll	lm	lm	lm	lm	lm	ll	lm	lm	ll	ll	lm	lm	ll	lm	lm	lm	lm	lm	ll	ll	ll	lm	ll	ll	lm	lm	lm	ll	lm	lm	ll	ll	ll	lm	lm	lm
6	5094	64104	<lmxll>	517	17	3.999	0	sc00158	CAAAGACGTAGAGGTTTGTTGGGACTTCAGAAGACCAGAAACAAACGTGAG	10	G	A	ll	lm	lm	lm	lm	lm	ll	lm	lm	ll	ll	lm	lm	ll	lm	lm	lm	lm	lm	ll	ll	ll	lm	ll	ll	lm	lm	lm	ll	lm	lm	ll	ll	ll	lm	lm	lm
7	518	5734	<lmxll>		17	4.231	0.232	RACA29	NAATTCTGCTTCCTACATGATGCATATGGATTTCTGTCATTAACAAAGGGG	23	A	T	ll	lm	--	lm	lm	lm	ll	lm	lm	ll	ll	lm	lm	ll	lm	lm	lm	lm	lm	ll	ll	ll	lm	ll	ll	lm	lm	lm	--	lm	lm	ll	ll	ll	lm	lm	lm
8	510	5670	<lmxll>		17	4.909	0.678	RACA29	ATCAAAAAGAAAATGTGACTTATAGTCCGGAAAATGTGGTGTTCAGAAATG	8	G	A	ll	lm	lm	lm	lm	lm	ll	lm	lm	ll	ll	lm	lm	ll	lm	lm	lm	lm	lm	ll	ll	ll	lm	ll	ll	lm	lm	lm	ll	lm	lm	ll	ll	ll	lm	lm	lm
9	421	4694	<nnxnp>		17	5.315	0.406	RACA29	GCGTGACACGCAGCTCCCAAAGACTGAATGGTGCTTTGGTATCGACTGAAT	8	C	T	nn	nn	--	np	np	np	nn	nn	np	nn	nn	nn	np	nn	np	nn	nn	nn	nn	nn	np	np	np	np	np	nn	nn	nn	--	nn	nn	nn	nn	nn	np	nn	np
10	515	5689	<lmxll>		17	5.558	0.243	RACA29	GCTGTTTGTTCAGCAGCTCGGGCGGTTCTATCCTCCGTGATTCTATTGAAA	36	G	A	ll	lm	--	lm	lm	lm	ll	lm	lm	ll	ll	lm	lm	ll	lm	lm	lm	lm	lm	ll	ll	ll	lm	ll	ll	lm	lm	lm	ll	lm	lm	ll	ll	ll	lm	lm	lm
11	3812	46566	<lmxll>		17	6.998	1.44	RACA19	CATGGGTCTGTTGGATCCAGGTTCAGGTTTGGAGGCTCAGGAAGATGATCA	18	A	G	ll	lm	lm	lm	lm	lm	--	lm	lm	ll	ll	lm	lm	--	lm	lm	lm	lm	lm	ll	ll	ll	lm	ll	ll	lm	lm	lm	ll	lm	lm	ll	ll	ll	lm	lm	lm
12	520	5739	<lmxll>	520	17	7.202	0.204	RACA29	CTTTTGCACAACGTGAAATCAGCTTCCATTTTGGGACTGTGGAAATCAACT	17	A	G	ll	lm	lm	lm	lm	lm	ll	lm	lm	ll	ll	lm	lm	ll	lm	lm	lm	lm	lm	ll	ll	ll	lm	ll	ll	lm	lm	lm	ll	lm	lm	ll	ll	ll	lm	lm	lm
13	5093	64079	<lmxll>	520	17	7.202	0	sc00158	CGTCTCCTGATTCCTCTCCGATCCCTGCAGCCGCTGCGTGTGCATGAGCAG	19	G	T	ll	lm	lm	lm	lm	lm	ll	lm	lm	ll	ll	lm	lm	ll	lm	lm	lm	lm	lm	ll	ll	ll	lm	ll	ll	lm	lm	lm	ll	lm	lm	ll	ll	ll	lm	lm	lm
14	3816	46641	<lmxll>		17	7.721	0.519	RACA19	AAACGTGATCCGAAGAGCTTTTATCTGACCTCAGAGGAGTTTGTATAGTCG	11	G	A	ll	lm	lm	lm	lm	lm	ll	lm	lm	ll	ll	lm	lm	ll	lm	lm	lm	lm	lm	ll	ll	ll	lm	ll	ll	lm	lm	lm	ll	lm	lm	ll	ll	ll	lm	lm	lm
15	3811	46561	<lmxll>		17	8.413	0.692	RACA19	AATTCCAAAAAAGAAATGAAATAGAAGTGCAGTAAATACAGGTATTATGGG	17	G	C	ll	lm	lm	lm	lm	lm	ll	lm	lm	ll	ll	lm	lm	ll	lm	lm	lm	lm	lm	ll	ll	ll	lm	ll	ll	lm	lm	lm	ll	lm	lm	ll	ll	ll	lm	lm	lm
16	5095	64136	<lmxll>		17	8.603	0.19	sc00158	GGAGGGTGTCGGATTGGGGGACTTCGTAAGTTTAGGATTCTCCGCTGATCT	43	G	A	ll	lm	lm	lm	lm	lm	ll	lm	lm	ll	ll	lm	lm	ll	lm	lm	lm	lm	lm	ll	ll	ll	lm	ll	ll	lm	lm	lm	ll	lm	lm	ll	ll	ll	lm	lm	lm
17	513	5677	<lmxll>	513	17	13.78	5.177	RACA29	TTTATAGGTGAACTTTATCATATTTTTGGACTACAGGTCAAACAGAAAATC	42	C	T	ll	lm	lm	lm	lm	lm	ll	lm	lm	ll	ll	lm	lm	ll	lm	lm	lm	lm	lm	ll	ll	ll	lm	ll	ll	lm	lm	lm	ll	lm	lm	ll	ll	ll	lm	lm	lm
18	521	5741	<lmxll>	513	17	13.78	0	RACA29	GTCCAGCAAAAGCCTGGATTAGACCTTATTAAAGTCTTGACGTTCTCCTAA	40	C	T	ll	lm	lm	lm	lm	lm	ll	lm	lm	ll	ll	lm	lm	ll	lm	lm	lm	lm	lm	ll	ll	ll	lm	ll	ll	lm	lm	lm	ll	lm	lm	ll	ll	ll	lm	lm	lm
19	524	5790	<lmxll>	513	17	13.78	0	RACA29	GATTATAAGCAGATAGTGGATCTTGTTAAAACGAGAGATTGAAGTTTGTTT	46	T	C	ll	lm	lm	lm	lm	lm	ll	lm	lm	ll	ll	lm	lm	ll	lm	lm	lm	lm	lm	ll	ll	ll	lm	ll	ll	lm	lm	lm	ll	lm	lm	ll	ll	ll	lm	lm	lm
20	5497	71280	<nnxnp>		17	15.261	1.481	sc01671	CTGTGAGAGCAAGGCAACATAAGGCAGGCTTTATTAGTCGACCACATTTTA	22	A	G	np	np	nn	np	nn	nn	np	nn	np	np	np	np	nn	np	nn	np	nn	np	np	np	np	nn	nn	nn	nn	nn	np	np	np	np	np	np	np	np	nn	np	nn
21	486	5425	<nnxnp>		17	15.33	0.069	RACA29	CTGCTAACCTGCTCAGCTTCGGGTCCTCGTGATACTGAAGCTGTTCTGAAN	28	G	A	np	np	nn	np	nn	nn	np	nn	np	np	np	np	nn	np	nn	np	nn	np	np	np	np	nn	nn	nn	nn	nn	np	np	np	--	np	np	np	np	nn	np	nn
22	470	5333	<hkxhk>		17	15.904	0.574	RACA29	GAAACCTCAATGACAGGTGTATCCACCTGTCTGCATCAACAGTAGAGGGAC	42	T	C	hk	--	hh	hk	hk	hk	hk	hk	kk	hk	hk	kk	hh	hk	hk	kk	hk	kk	kk	hk	hk	hk	hk	hh	hh	hk	kk	kk	hk	hk	kk	hk	hk	hk	hh	kk	hk
23	478	5369	<nnxnp>		17	16.651	0.747	RACA29	TAAAAAATGGTTCCAAATAACCAAAAACAAATGCCTATTAAGAGCATTTTC	38	T	A	np	np	nn	nn	nn	nn	np	nn	np	np	np	np	nn	np	--	np	nn	np	np	np	np	nn	nn	nn	nn	--	np	np	np	np	np	np	np	np	nn	np	nn
24	477	5366	<nnxnp>		17	17.078	0.427	RACA29	ACACACACAATGGCAATGTATTAGGCACCCTGACCTTTACAGTGACTCAGG	22	G	A	np	np	--	nn	nn	nn	np	nn	np	np	np	np	nn	np	nn	np	nn	np	np	np	np	nn	nn	nn	nn	nn	np	np	np	np	np	np	np	np	nn	np	nn
25	484	5410	<hkxhk>		17	17.582	0.504	RACA29	CGGAGCTCCCAAAGCGGACTCCGTTGGGGTTTAGTGTTCCATCACTACAGC	46	A	G	hk	kk	--	kk	hk	hk	hk	hk	kk	hk	hk	kk	hh	hk	hk	kk	hk	kk	kk	hk	hk	hk	hk	hh	hh	hk	kk	kk	--	kk	kk	hk	hk	hk	hh	kk	hk
26	489	5456	<lmxll>		17	18.757	1.175	RACA29	TTTTGTCATCTTGTCAAAAGAAGCTGGATTGGATTTTTTTTCCCTTTTTTT	23	C	G	ll	lm	--	lm	lm	lm	ll	lm	lm	ll	ll	lm	ll	ll	lm	lm	lm	lm	lm	ll	ll	lm	lm	ll	ll	lm	lm	lm	ll	lm	lm	ll	ll	ll	ll	lm	lm
27	491	5460	<lmxll>		17	18.934	0.177	RACA29	GGTTGGTCATAAGTAATAAGCTGCAAGCACTGTTGCATGACCCACATATGT	35	C	T	ll	lm	ll	lm	lm	lm	ll	lm	lm	ll	ll	lm	ll	ll	lm	lm	lm	lm	lm	ll	ll	lm	lm	ll	ll	lm	lm	lm	ll	lm	lm	ll	ll	ll	ll	lm	lm
28	464	5282	<hkxhk>		17	20.436	1.502	RACA29	ATAGAGGAAAAGCAGACAGGAGGTTCATGGATGTGTGAGGGGGAGGATGTG	12	C	A	hk	kk	--	hk	hk	hk	hk	hk	kk	hk	kk	kk	hh	hk	hk	kk	hk	kk	kk	hk	hk	hk	hk	hh	hh	hk	kk	kk	--	kk	kk	hk	hk	hk	hk	kk	hk
29	472	5342	<nnxnp>		17	20.817	0.381	RACA29	TCAGGTTTTTGTTTTCTCCTTCGACCCATGCATTAAGCTGCTGCAGCCACG	22	C	G	np	np	nn	nn	nn	nn	np	nn	np	np	np	np	nn	np	nn	np	nn	np	np	np	np	nn	nn	nn	nn	nn	np	np	np	np	np	np	np	np	nn	np	nn
30	471	5340	<nnxnp>		17	20.989	0.172	RACA29	GGTGGAGTTAAGATGAAGGGTGGCATACAAACTGAATCACAGTCACAAATG	9	G	A	np	np	nn	nn	nn	nn	np	nn	np	np	np	np	nn	np	nn	np	nn	np	np	np	np	nn	nn	nn	nn	nn	np	np	np	np	np	np	np	np	nn	np	nn
31	455	5220	<hkxhk>		17	21.753	0.764	RACA29	TAGATTATTAGTTAATTACGAGAAAAGCCCAAACATAAAAAGTCCTCAACA	14	A	T	hk	hk	--	hk	hk	hk	hk	hk	kk	hk	hk	kk	hh	hk	hk	kk	hk	kk	kk	hk	hk	hk	hk	hh	hh	hk	kk	kk	hk	kk	kk	hk	hk	hk	hh	kk	hk
32	456	5238	<lmxll>		17	22.938	1.185	RACA29	GGGTGTTGCACAGGATGGGTGCAACAGGAATTGGGTAAACACCGGCCCCAG	45	C	G	ll	lm	ll	lm	lm	lm	ll	lm	lm	ll	ll	lm	ll	ll	lm	lm	lm	lm	lm	ll	ll	lm	lm	ll	ll	lm	lm	lm	ll	lm	lm	ll	ll	ll	ll	lm	lm
33	463	5278	<nnxnp>	463	17	23.998	1.06	RACA29	GTATGCATGTTTATATCTAGTTTTGTTTGACCACAGACGAATGAGTCTGAT	11	T	C	nn	nn	np	np	np	np	nn	np	nn	nn	nn	nn	np	nn	np	nn	np	nn	nn	nn	nn	np	np	np	np	np	nn	nn	nn	nn	nn	nn	nn	nn	np	nn	np
34	466	5298	<nnxnp>	463	17	23.998	0	RACA29	TGTATTTCTGTCATTGATTTCTTCTCACGAGCTGTTTGCTGATTGTAGATT	28	G	A	nn	nn	np	np	np	np	nn	np	nn	nn	nn	nn	np	nn	np	nn	np	nn	nn	nn	nn	np	np	np	np	np	nn	nn	nn	nn	nn	nn	nn	nn	np	nn	np
35	458	5263	<hkxhk>		17	24.423	0.425	RACA29	AGCCGTCTACAGATGGATGAATCAGAATAGAGCAGACCATTGGTAGCTTCT	3	C	T	kk	hk	--	hh	hh	hh	kk	hh	hk	kk	kk	hk	hk	kk	hh	hk	hh	hk	hk	kk	kk	hh	hh	hk	hk	hh	hk	hk	kk	hk	hk	kk	kk	kk	hk	hk	hh
36	460	5269	<efxeg>		17	24.595	0.172	RACA29	CTGCAGTCACACTTTTCTGCGGTCGCAGCTCTCTCCTGGAAACAGGAAGTA	20	G	A	ee	ef	eg	fg	--	fg	ee	fg	ef	ee	ee	ef	eg	ee	fg	ef	--	ef	ef	ee	ee	--	fg	eg	eg	fg	ef	ef	ee	ef	ef	ee	ee	ee	eg	ef	fg
37	459	5266	<efxeg>		17	24.995	0.4	RACA29	GCAAGTGAAGCCATGAAGGAGTGTATCGTTCAGGAATAAATGACTGATCCT	26	C	T	ee	ef	eg	fg	fg	fg	ee	fg	ef	ee	ee	ef	eg	ee	fg	ef	fg	ef	ef	ee	ee	fg	fg	eg	eg	fg	ef	ef	ee	ef	ef	ee	ee	ee	eg	ef	fg
38	468	5323	<hkxhk>		17	25.225	0.23	RACA29	TTTTCTAATGTTTGATTTTTTTTTTAAAGTTTTGCTTTGCTTAGCAGCAAA	11	T	C	hh	hk	--	kk	kk	--	hh	kk	hk	--	hh	hk	hk	hh	kk	hk	kk	hk	hk	hh	hh	kk	kk	hk	hk	kk	hk	hk	--	hk	hk	hh	hh	hh	hk	hk	kk
39	461	5275	<nnxnp>		17	25.905	0.68	RACA29	GATTCACTGACCTAAAATTGACCCATCTATACCAAAACTTCCACCAGTGTG	22	T	C	nn	np	np	np	np	np	nn	np	nn	nn	nn	nn	np	nn	np	--	np	nn	nn	nn	nn	np	np	np	np	np	nn	nn	--	nn	nn	nn	nn	nn	np	--	np
40	452	5143	<nnxnp>	452	17	27.981	2.076	RACA29	GTGTTTTGATGTCTTTTTCCATCAGGGCTTATTTGGTAAGAGTCTCGACAG	8	A	G	nn	nn	--	np	np	np	nn	np	np	nn	nn	nn	np	nn	np	nn	np	nn	nn	nn	nn	np	np	np	np	np	nn	nn	nn	nn	nn	nn	nn	nn	np	nn	np
41	453	5145	<nnxnp>	452	17	27.981	0	RACA29	NAATTCCAGTGCTTTCTGACTAATGCCATGGCCGGCGTGCACAGCCTCCGT	41	C	G	nn	nn	--	np	np	np	nn	np	np	nn	nn	nn	np	nn	np	nn	np	nn	nn	nn	nn	np	np	np	np	np	nn	nn	nn	nn	nn	nn	nn	nn	np	nn	np
42	438	5005	<lmxll>	438	17	28.857	0.876	RACA29	AAAGAAAACTTGATTCTCAAAGCATATGAGGTTTGTGCCTAGCAAATAAAA	33	T	C	ll	lm	ll	lm	lm	lm	ll	lm	lm	ll	ll	ll	ll	ll	lm	lm	lm	lm	lm	ll	ll	lm	lm	ll	ll	lm	lm	lm	ll	lm	lm	ll	ll	ll	ll	lm	lm
43	442	5042	<lmxll>	438	17	28.857	0	RACA29	GGCAGACAGCAAGCAGCAACAGAAAACAACTGGAAGGTAGTGAAAGGAACA	20	A	G	ll	lm	ll	lm	lm	lm	ll	lm	lm	ll	ll	ll	ll	ll	lm	lm	lm	lm	lm	ll	ll	lm	lm	ll	ll	lm	lm	lm	ll	lm	lm	ll	ll	ll	ll	lm	lm
44	445	5057	<hkxhk>		17	28.922	0.065	RACA29	GAAACATGAGAAAAAGCCAACTCTGCTTTTTCGATGTGCTGTTTTTCTTTT	9	G	A	kk	hk	hk	hh	hh	hh	kk	hh	hh	kk	kk	kk	hk	kk	hh	hk	hh	hk	hk	kk	kk	hh	hh	hk	hk	hk	hk	hk	kk	hk	hk	kk	kk	kk	hk	hk	hh
45	4059	49950	<nnxnp>		17	31.024	2.102	RACA28	NNTGAAAACAAACACAGCGATGTGGTTACCAGTGCCTTTGTAGAGTTCTCT	21	A	G	nn	np	np	np	np	np	np	nn	--	np	nn	nn	np	nn	np	np	np	np	np	np	nn	nn	np	np	np	nn	nn	np	np	nn	np	nn	nn	nn	np	np	np
46	426	4764	<lmxll>		17	33.63	2.606	RACA29	ATGCAGGCAGTTATGGTGAAATATAACGGACACTGTATGATGGGTTCATGC	7	C	T	ll	lm	ll	lm	lm	lm	ll	lm	lm	ll	ll	ll	ll	ll	lm	lm	lm	lm	lm	ll	ll	lm	lm	ll	ll	lm	lm	lm	ll	lm	lm	ll	lm	ll	ll	lm	lm
47	427	4765	<lmxll>		17	33.765	0.135	RACA29	CAGGTTTCTGTCTGCTGAGGAGGTAAAAGCCTAAAGAAGATGCAAAGGAGT	45	A	T	ll	lm	ll	lm	lm	lm	ll	lm	lm	ll	ll	ll	ll	ll	lm	lm	lm	lm	lm	ll	ll	lm	lm	ll	ll	lm	lm	lm	ll	lm	lm	ll	lm	ll	ll	lm	lm
48	431	4864	<hkxhk>		17	34.102	0.337	RACA29	NAATTCCACTGGGGAAGGAAACAGTGCCTGCTGTTGTTGAAACTCCACTGA	8	C	A	hk	hh	--	hk	hk	hk	hk	--	hk	--	hk	hk	kk	hk	hk	hh	hk	hh	hh	hk	kk	hk	hk	kk	kk	hh	hh	hh	hk	hh	hh	hk	hh	hk	kk	hh	hk
49	433	4899	<hkxhk>		17	35.014	0.912	RACA29	TTAACATCTGTGCCAGAAACAGTTGGAGAAAAGCAAAGCAAATCTTGGGAT	3	A	T	hk	kk	hh	hk	hk	hk	hk	hk	hk	hk	hk	hk	hh	hk	hk	kk	hk	kk	kk	hk	hh	hk	hk	hh	hh	kk	kk	kk	hk	kk	kk	hk	hk	hk	hh	kk	hk
50	422	4724	<lmxll>		17	35.589	0.575	RACA29	GGAGTTCTTTTGGTGAACAGGAGGCAAACTCACATCCATCAGACCACCTAA	19	G	T	ll	lm	ll	lm	lm	lm	ll	lm	lm	ll	ll	ll	ll	ll	lm	lm	lm	lm	ll	ll	ll	lm	lm	ll	ll	lm	lm	lm	ll	lm	lm	ll	lm	ll	ll	lm	lm
51	423	4729	<lmxll>		17	35.592	0.003	RACA29	GCATTCAGTCACCTTTGGTCACTAAACTTCCAGATGGTTGAGAAGCAGAAG	38	T	C	ll	lm	ll	lm	lm	lm	ll	lm	lm	ll	ll	ll	ll	ll	lm	lm	lm	lm	ll	ll	ll	lm	lm	--	ll	lm	lm	lm	ll	lm	lm	ll	lm	ll	ll	lm	lm
52	4068	50231	<nnxnp>		17	42.08	6.488	RACA28	GGTCTCAGCCTCAGACTGTGTCTCTAGAAGGTGAGAGCACTTCTCAAAGTC	32	G	T	nn	np	np	np	np	np	np	nn	nn	np	nn	nn	np	nn	np	np	np	np	np	np	nn	nn	np	np	np	nn	nn	np	np	nn	np	nn	nn	nn	np	np	np
53	4069	50240	<nnxnp>		17	42.147	0.067	RACA28	GTCATGGAGCCTCAGTCTGAGGGAGATTGACAGTCATGTTTAGCTTCTTCC	21	A	G	nn	np	np	np	np	np	np	nn	nn	np	nn	nn	np	nn	np	np	np	np	np	np	nn	nn	np	np	np	nn	nn	np	np	nn	np	nn	nn	nn	np	np	np
54	907	10248	<nnxnp>		17	42.482	0.335	RACA34	CACATTTACAGAGCTTTCAAGCCCCTCCCCGTAGAAAACACCTGCACAGAT	17	C	A	nn	np	np	np	np	np	np	nn	nn	np	nn	nn	np	nn	np	np	np	np	np	np	nn	nn	np	np	np	nn	nn	np	np	nn	np	nn	nn	nn	np	np	np
55	2925	35585	<hkxhk>		17	42.605	0.123	RACA37	TCTTCTCAGACTGTTTGGCGTTAGACAAACGATCAGAATACAGTGGGACAG	43	T	C	hk	hk	hh	--	hh	hk	hk	hk	hk	hh	--	hk	hh	hk	hh	hh	hh	hh	hh	hk	hk	kk	hk	hh	hk	hk	hk	hk	hh	kk	hk	hk	kk	hk	hh	hk	hh
56	396	4468	<hkxhk>		17	43.422	0.817	RACA29	TTTTTTGAGTCAGTTTGTGAGTGTGCTGTGAGTGCTAAGAATGGGAGTTGT	8	G	A	hk	hk	--	hh	hk	hh	kk	kk	hk	kk	hk	kk	hk	kk	hh	--	kk	hk	kk	kk	hk	hh	hh	--	hk	hk	hh	hk	--	hk	hk	kk	hk	kk	hk	hk	hk
57	5404	69165	<hkxhk>		17	43.766	0.344	sc00315	GAATTCTCAGCCCAGTCCTAAAGAAAATGTATATGGGCATTCTCTTCTAAG	30	A	T	hk	hk	--	hh	hh	hk	hk	hk	hk	hh	kk	hk	hh	hk	hh	hh	hh	hh	hh	hk	hk	kk	hh	hh	hk	hk	hk	hk	--	kk	hk	hk	kk	hk	hh	hk	hh
58	4073	50266	<efxeg>		17	44.774	1.008	RACA28	CTGCAGACTCTTGACCTGCAGGAACTCCAGACAACCTGGGAGAAGTTCAGA	3	C	A	ef	eg	fg	fg	fg	eg	eg	ef	ef	--	ee	ef	fg	ef	fg	fg	fg	--	--	eg	ef	--	eg	fg	eg	ef	ef	eg	fg	ee	eg	ef	ee	ef	--	eg	fg
59	392	4406	<hkxhk>		17	45.322	0.548	RACA29	CCTGGAGAAATGTTTGGGTAAAAGCTGTCACGGTTTCTCCTTCCGAGTCGG	8	A	C	kk	hh	kk	hk	kk	hk	hk	hk	kk	hk	hk	hk	kk	hk	hk	hk	hk	hh	hk	hk	kk	hk	hk	kk	kk	hh	hk	hh	hk	hh	hh	hk	hh	hk	kk	hh	hh
60	387	4368	<lmxll>		17	46.782	1.46	RACA29	GAGCGTAAGTGAGGTTTTGTGTGTGCATAAGTGTGTGCATGTAATTTTAAT	40	G	A	lm	ll	lm	ll	lm	--	lm	lm	lm	lm	ll	lm	lm	lm	ll	lm	lm	ll	lm	lm	lm	ll	ll	lm	lm	ll	ll	ll	lm	ll	ll	lm	ll	lm	lm	ll	ll
61	5350	68384	<hkxhk>		17	46.798	0.016	sc00284	GGAAAGCTGGACGCATTCTGTACAGGAGACACGGCAGGGAGATTGACAAGT	6	C	G	hk	hk	hh	hh	hh	hk	hk	hk	hk	hh	kk	hk	hh	hk	hh	hh	hh	hh	hh	hk	hk	kk	hk	hh	hk	hk	hk	hk	hh	kk	hk	hk	kk	hk	hh	hk	hh
62	386	4362	<lmxll>		17	46.837	0.039	RACA29	GGCACATTCACGTCTGACAGTCCCTGCAGATCCTGCGATTACAGCAGGCGC	41	C	T	lm	ll	lm	ll	lm	ll	lm	lm	lm	lm	ll	lm	lm	lm	ll	lm	lm	ll	lm	lm	lm	ll	ll	lm	lm	ll	ll	ll	lm	ll	ll	lm	ll	lm	lm	ll	ll
63	388	4377	<lmxll>		17	47.74	0.903	RACA29	CATTCATACCAACAAAGACTTCTTAGAGAGATTTGACTTTTACAAGAATTC	41	A	C	lm	lm	--	ll	lm	ll	lm	lm	lm	lm	ll	lm	lm	lm	ll	lm	lm	ll	lm	--	lm	ll	ll	lm	lm	ll	ll	ll	--	ll	ll	lm	ll	lm	lm	ll	ll
64	592	6488	<nnxnp>		17	49.191	1.451	RACA29	NAATTCACTTCGTCTTTGCTCTCCGCAGTAATTGTAAAATTGTGGGGAGTC	21	T	C	nn	np	nn	nn	nn	nn	np	np	nn	np	nn	nn	nn	nn	nn	np	np	np	np	np	nn	nn	nn	nn	np	np	nn	np	np	np	np	np	np	np	np	np	np
65	370	4084	<nnxnp>		17	49.276	0.085	RACA29	GAAACCGTCTGTGGGATGCTGCGTTTTCTCTGATCTTTTGTACTCTCCATT	16	A	T	nn	np	nn	nn	nn	nn	np	np	nn	np	nn	nn	nn	nn	nn	np	np	np	np	np	nn	nn	nn	nn	np	np	nn	np	np	np	np	np	np	np	np	np	np
66	416	4633	<nnxnp>		17	55.746	6.47	RACA29	TGTTAAAGATCATTTATTCCAATGGATTTCCAATGGATCTGAAGAAGTCTT	31	A	G	np	nn	nn	np	nn	nn	nn	nn	np	nn	np	np	nn	np	np	nn	nn	nn	nn	nn	np	np	nn	nn	nn	np	np	nn	nn	np	nn	np	nn	nn	nn	nn	nn
67	580	6411	<lmxll>		17	56.289	0.543	RACA29	AAAGGAGGACAGCAGTTGTGTTTTGGTTCAGATGTCCCGTTTGGGTGTGGC	18	T	C	lm	ll	--	lm	lm	ll	ll	lm	lm	lm	ll	lm	lm	lm	ll	lm	lm	ll	lm	lm	lm	ll	ll	lm	lm	lm	lm	ll	--	ll	ll	lm	ll	lm	lm	ll	ll
68	579	6393	<lmxll>		17	56.405	0.116	RACA29	TGTCATTTTCTTCCAATAATTTAAAAAAAAGAAACACATTTAGTTAATTGT	21	T	A	lm	ll	--	lm	lm	ll	ll	lm	lm	lm	ll	lm	lm	lm	ll	lm	lm	ll	lm	lm	lm	ll	ll	lm	lm	lm	lm	ll	lm	ll	ll	lm	ll	lm	lm	ll	ll
69	432	4867	<nnxnp>		17	57.115	0.71	RACA29	AATAGCCATCAAAAATTTGGGTGAATGTGGGAAACTGAATGAATTGTGTTT	13	C	A	--	nn	--	np	nn	nn	nn	nn	np	nn	np	np	nn	np	np	nn	nn	nn	nn	nn	np	np	nn	nn	nn	np	np	nn	nn	np	nn	np	nn	nn	nn	nn	nn
70	558	6245	<lmxll>		17	58.222	1.107	RACA29	TTCATTTTCTTCAGAAGTCTTTAAAAATCCTTAAATGTAACTTCTGTGAAT	3	A	G	lm	--	lm	lm	lm	ll	ll	lm	lm	lm	ll	lm	lm	lm	ll	lm	lm	ll	lm	lm	lm	ll	ll	lm	lm	lm	lm	ll	lm	ll	ll	lm	ll	lm	lm	ll	ll
71	588	6467	<lmxll>		17	59.65	1.428	RACA29	ACTTACCTTCTACCTGATCTTAGACATAAACGCTCAGTGTCATTTGATCCC	4	A	C	ll	lm	ll	ll	ll	lm	lm	ll	ll	ll	lm	ll	ll	ll	lm	ll	ll	lm	ll	ll	ll	lm	lm	ll	ll	lm	ll	lm	ll	lm	lm	ll	lm	ll	ll	lm	lm
72	4065	50173	<nnxnp>		17	59.912	0.262	RACA28	CTCCTAAAAGCCTTTTAATTTCTTTGAGCTTGAAATTTTGAGTTTAGAAAA	9	A	G	nn	np	np	nn	np	np	np	np	nn	np	--	nn	nn	nn	nn	np	np	np	np	np	nn	nn	np	np	np	nn	nn	np	np	nn	np	nn	np	np	np	np	np
73	560	6271	<nnxnp>		17	59.988	0.076	RACA29	GACCTGGTGGGGTTTCTATGATCATGAGAACAGAGAGAAATCGCCCTAAAA	43	C	G	nn	np	np	nn	np	np	np	np	nn	np	nn	nn	nn	nn	nn	np	np	np	np	np	nn	nn	np	np	np	nn	nn	np	np	nn	np	nn	np	np	np	np	np
74	587	6459	<lmxll>		17	60.219	0.231	RACA29	TCTTTGCTGAAACACTAAAATAGCTGCATCTCCTTGCCTGAAAATGACCAA	34	T	C	ll	lm	ll	ll	ll	lm	lm	ll	ll	ll	lm	ll	ll	ll	lm	ll	ll	lm	ll	ll	ll	lm	lm	ll	ll	lm	ll	lm	--	lm	lm	ll	lm	ll	ll	lm	lm
75	527	5858	<nnxnp>		17	61.654	1.435	RACA29	CTGTCTGTGGTAAGATGGGGTTCCTTAAGTAAGTTTAGCTAGAGAGAACTA	4	T	C	nn	np	np	nn	np	np	np	np	nn	np	nn	nn	nn	nn	nn	np	np	np	np	np	nn	nn	nn	np	np	nn	nn	np	np	nn	np	nn	np	np	np	np	np
76	593	6489	<lmxll>		17	61.995	0.341	RACA29	GAATTCTGTCTGTGATAATGAAAACAAGAAGGTGCGTGCAGCATAAACCCG	43	T	C	ll	lm	--	ll	ll	lm	lm	ll	ll	ll	lm	ll	ll	ll	lm	ll	ll	lm	ll	ll	ll	lm	lm	ll	ll	lm	ll	lm	--	lm	lm	ll	lm	ll	ll	lm	lm
77	391	4394	<nnxnp>		17	62.867	0.872	RACA29	CAACATTTCCTTGATTTTACCCGAGCTTCCATCCATGTTCGTTGATAATGT	47	A	T	nn	np	--	nn	np	np	np	np	nn	np	nn	nn	np	nn	nn	np	np	np	np	np	--	nn	np	np	np	--	nn	np	--	--	np	nn	np	np	np	np	np
78	583	6430	<lmxll>		17	63.113	0.246	RACA29	GAATGCTGGGTAGCATAGTGTATCCCTGCAGAATTTTCCACTAGATGTGAA	22	T	G	ll	lm	--	ll	ll	lm	lm	ll	ll	ll	lm	ll	ll	ll	lm	ll	ll	lm	ll	ll	ll	lm	lm	--	ll	ll	ll	lm	--	lm	lm	ll	lm	ll	ll	lm	lm
79	576	6376	<lmxll>		17	63.202	0.089	RACA29	GGTGGACCACAAGCTGGGTATTCATGGGTTAATAGTGATTTATCTCATTCC	11	A	T	ll	lm	ll	ll	ll	lm	lm	ll	ll	ll	lm	ll	ll	--	lm	ll	ll	lm	ll	ll	ll	lm	lm	ll	ll	ll	ll	lm	ll	lm	lm	ll	lm	ll	ll	lm	lm
80	577	6382	<lmxll>	577	17	63.28	0.078	RACA29	GACAAAATAAGGATGCCTGGCGCACCTTTGACAGTTCTACCTGACTGTGAA	37	T	C	ll	lm	ll	ll	ll	lm	lm	ll	ll	ll	lm	ll	ll	ll	lm	ll	ll	lm	ll	ll	ll	lm	lm	ll	ll	ll	ll	lm	ll	lm	lm	ll	lm	ll	ll	lm	lm
81	578	6391	<lmxll>	577	17	63.28	0	RACA29	CACTTGGGGAAACAAATGTACTAATATTCATCCAAAAAGCCTCTGTTTGAG	12	C	A	ll	lm	ll	ll	ll	lm	lm	ll	ll	ll	lm	ll	ll	ll	lm	ll	ll	lm	ll	ll	ll	lm	lm	ll	ll	ll	ll	lm	ll	lm	lm	ll	lm	ll	ll	lm	lm
82	565	6288	<lmxll>		17	64.628	1.348	RACA29	TCCAGCACAGACGTCGATCTCCAACAAAGAAGAGAGTGCCAATCAAAAGAT	33	G	A	lm	ll	lm	lm	lm	ll	ll	lm	lm	lm	ll	lm	lm	lm	ll	lm	lm	ll	lm	lm	lm	ll	ll	lm	lm	lm	lm	ll	--	ll	ll	lm	ll	lm	lm	ll	ll
83	574	6363	<lmxll>		17	64.993	0.365	RACA29	TTAGTCGTGTGGTTTTGTTTACCAGCTTTGGTTCAAAACAGTGGAAAGGCG	18	T	A	lm	ll	lm	lm	lm	--	ll	lm	lm	lm	ll	lm	lm	lm	ll	lm	lm	ll	lm	lm	lm	ll	ll	lm	lm	lm	lm	ll	lm	ll	ll	lm	ll	lm	lm	ll	ll
84	536	5973	<nnxnp>		17	65.701	0.708	RACA29	GCTTGTGGGTTCATTTGTGGCTGTTTTGCTTCACTGGGGGCTTTTGCAGAA	9	C	T	nn	np	np	nn	np	np	np	np	nn	np	nn	nn	nn	nn	nn	np	np	np	np	np	nn	nn	nn	np	np	nn	nn	np	np	nn	np	nn	np	np	np	np	np
85	564	6286	<lmxll>		17	66.225	0.524	RACA29	GATGTGTCACTCATCTCCAGAATAAAGGAGAAGACGAACTTAAGATATACA	36	A	G	lm	--	--	lm	lm	ll	ll	lm	lm	lm	ll	lm	lm	lm	ll	lm	lm	ll	lm	lm	lm	ll	ll	lm	lm	lm	lm	ll	lm	ll	ll	lm	ll	lm	lm	ll	ll
86	544	6044	<efxeg>		17	66.997	0.772	RACA29	AATAGAAATTAGTTATTCAGATGACATCACAACCCTTAGAATGTATTGCCA	4	G	C	ef	eg	fg	ef	--	eg	eg	fg	ef	fg	ee	ef	ef	ef	ee	fg	--	eg	fg	fg	ef	ee	ee	fg	fg	ef	ef	eg	fg	ee	eg	ef	eg	fg	fg	eg	eg
87	543	6043	<efxeg>		17	67.036	0.039	RACA29	TACTTGATCTGCCATAACAGCCCATCTTTTCTTTATTTGGACTTAAGACAT	24	C	T	ef	eg	fg	ef	fg	eg	eg	fg	ef	fg	ee	ef	ef	ef	ee	fg	fg	eg	fg	fg	ef	ee	ee	fg	fg	ef	ef	eg	fg	ee	eg	ef	eg	fg	fg	eg	eg
88	547	6072	<hkxhk>		17	68.117	1.081	RACA29	CTATTTGCAATCCATTGTAAACAGTATCTATATAGTTCATACATTTTTGCA	41	C	A	hk	hk	--	hk	hh	hk	hk	hh	hk	hh	kk	hk	hk	hk	kk	hh	hh	hk	hh	hh	hk	kk	kk	hh	hh	hk	hk	hk	--	kk	--	hk	hk	hh	hh	hk	hk
89	534	5954	<lmxll>		17	68.129	0.012	RACA29	CCGACCGAAAACACGTTGGCACAGTGGTGGATTTGTTCGATGAGAAGGTCA	6	G	A	lm	ll	lm	lm	lm	ll	ll	lm	lm	lm	ll	lm	lm	lm	ll	lm	lm	ll	lm	lm	lm	ll	ll	lm	lm	lm	lm	ll	lm	ll	ll	lm	ll	lm	lm	ll	ll
90	548	6102	<hkxhk>		17	68.151	0.022	RACA29	GGTATGAGTGATTACAAGCCTTCACTGTCTAAAAAATTACTCCAGGAGTTG	37	T	A	hk	hk	kk	hk	kk	hk	hk	--	hk	kk	hh	hk	hk	hk	hh	kk	kk	hk	kk	kk	hk	hh	hh	kk	kk	hk	hk	hk	kk	hh	hk	hk	hk	kk	kk	hk	hk
91	535	5956	<lmxll>		17	68.177	0.026	RACA29	GCTTAAACATGAGAATTTGGAGTTGCAATAATCAAGAAATTAAAGCATGTA	24	G	T	lm	ll	--	lm	lm	ll	ll	lm	lm	lm	ll	lm	lm	lm	ll	lm	lm	ll	lm	lm	lm	ll	ll	lm	lm	lm	lm	ll	lm	ll	ll	lm	ll	lm	lm	ll	ll
92	546	6071	<nnxnp>		17	69.002	0.825	RACA29	GGGAAGTGATTTCTCATATAACCACGTGTCTCCTGGATGTCCCAAACTTCA	25	G	A	nn	np	np	nn	np	np	np	np	nn	np	nn	nn	nn	nn	nn	np	np	np	np	np	nn	nn	nn	np	np	nn	nn	np	np	nn	np	nn	np	np	np	np	np
93	545	6059	<nnxnp>		17	69.103	0.101	RACA29	CAGATGAAAGTTGCCGAGCTTTTACAAATGCTTTGGTCCTCTCCGTCCTCG	11	T	A	nn	np	--	nn	np	np	np	np	nn	np	nn	nn	nn	nn	nn	np	np	np	np	--	nn	nn	nn	np	np	nn	nn	np	--	nn	np	nn	np	np	np	np	np
94	555	6171	<nnxnp>		17	69.275	0.172	RACA29	NAATTCATCAGATACGTGAAACAAAAACCCTGGTTTTCGGCCGTTCTGTCA	36	T	A	nn	np	np	nn	np	np	np	np	nn	np	nn	nn	nn	nn	--	np	np	np	np	np	nn	nn	nn	np	--	nn	nn	np	np	nn	--	nn	np	np	np	np	np
95	550	6142	<nnxnp>		17	69.408	0.133	RACA29	TGTTCAGTTAAATACAGTTGTGATCATGTGGAAGATTAAAAACAGATTGGT	23	C	T	nn	np	np	nn	np	np	np	np	nn	np	nn	nn	nn	nn	nn	np	np	np	np	np	nn	nn	nn	np	np	nn	nn	np	np	nn	np	nn	np	np	np	np	np
96	551	6153	<nnxnp>		17	70.129	0.721	RACA29	GAATTCCAGTCTGTATTCTTAATTCTTTTTTTAGGCGTTTAACTGTAAATG	31	A	T	nn	np	np	nn	np	np	np	np	nn	np	nn	nn	nn	nn	nn	np	np	np	np	np	nn	nn	nn	np	np	nn	nn	np	np	nn	nn	nn	np	np	np	np	np
97	563	6274	<lmxll>	563	17	70.467	0.338	RACA29	GTAACCTCTTTAAGATACTCTTCTATCCTTTTTGAATGGATTATCTATAGT	16	A	G	ll	lm	ll	ll	ll	lm	lm	ll	ll	ll	lm	ll	ll	ll	lm	ll	ll	lm	ll	ll	ll	lm	lm	ll	ll	ll	ll	lm	ll	lm	lm	ll	lm	ll	ll	lm	lm
[truncated: 638 more rows]
[truncated: 21 more columns]

## Sheet: Phenotype
Individuals	Phenotype for sex	Code for QTL
[truncated: 58 more rows]
